# Supplementary material for: Heterosis in Early Maize Ear Inflorescence Development: A Genome-Wide Transcription Analysis for Two Maize Inbred Lines and Their Hybrid
Source: Int J Mol Sci. 2014 Aug 11;15(8):13892–915. doi: 10.3390/ijms150813892 (PMC4159830; doi:10.3390/ijms150813892)
Supplement: Supplementary File 1 [file ijms-15-13892-s001.zip › ijms-56986-SI-Tables-final.xlsx]

## Sheet: Table S1
Supplementary Information
Table S1. Reference tag database, major characteristics of DGE libraries and tag mapping to the maize B73 reference genome.
(a) Reference tag database
	B73		Mo17		F1
Reference Gene	32540		32540		32540
Genes With CATG Site	32150	0.988	32150	0.988	32150	0.988
# of Total Reference Tags	578031		578031		578031
# of Unambiguous Tags	532956	0.922	532956	0.922	532956	0.922
# of Ambiguous tags	45075	0.078	45075	0.078	45075	0.078
Note: We take all CATG*** tags in a gene, not only the 3' end one, as its reference tags.
(b) Major characteristics of DGE libraries and tag mapping to the maize reference genome.
Digital gene expression (DGE) library
category	B73						Mo17						F1
	Distinct Tag	%	Total Tag Number	%	Number of Gene	%	Distinct Tag	%	Total Tag Number	%	Number of Gene	%	Distinct Tag	%	Total Tag Number	%	Number of Gene	%
Raw Data	254882	100	4200000	100			252386	100	4200000	100			272402	100	4200000	100
Tags Containing N	12698	4.98	23175	0.55			12423	4.92	23248	0.55			13120	4.82	23378	0.56
Adaptors	0	0	0	0			0	0	0	0			0	0	0	0
*Tag CopyNum <1	0	0	0	0			0	0	0	0			0	0	0	0
Clean Tag	242184	95.02	4176825	99.45			239963	95.08	4176752	99.45			259282	95.18	4176622	99.44
CopyNum >=1	242184	100	4176825	100			239963	100	4176752	100			259282	100	4176622	100
CopyNum >5	53515	22.1	3851310	92.21			51013	21.26	3862547	92.48			59582	22.98	3828872	91.67
CopyNum >10	36100	14.91	3719564	89.05			34925	14.55	3740525	89.56			40125	15.48	3681798	88.15
CopyNum >20	24504	10.12	3549808	84.99			23895	9.96	3579385	85.7			26270	10.13	3478572	83.29
CopyNum >50	13658	5.64	3198679	76.58			13746	5.73	3250369	77.82			13702	5.28	3073654	73.59
CopyNum >100	7749	3.2	2774866	66.43			7893	3.29	2831969	67.8			7421	2.86	2628103	62.92
Tag mapping
Clean Tag	242184	100	4176825	100	32540	100	239963	100	4176752	100	32540	100	259282	100	4176622	100	32540	100
All Tag Mapping to Sense Gene	90153	37.23	2749499	65.83	23032	70.78	93464	38.95	2864901	68.59	23133	71.09	90509	34.91	2467368	59.08	23534	72.32
Unambiguous Tag Mapping to Sense Gene	79545	32.84	2439024	58.39	19753	60.7	82698	34.46	2570907	61.55	19891	61.13	80118	30.9	2200507	52.69	20253	62.24
Perfect Match(Sense)§
1 tag->1 gene	51430	21.24	2146173	51.38	18667	57.37	53452	22.28	2264432	54.22	18846	57.92	50504	19.48	1887962	45.2	19320	59.37
1 tag->n gene	6290	2.6	275047	6.59	8973	27.58	6466	2.69	264378	6.33	9167	28.17	6098	2.35	223952	5.36	9048	27.81
1bp MisMatch(Sense)
1 tag->1 gene	28115	11.61	292851	7.01	11686	35.91	29246	12.19	306475	7.34	11537	35.45	29614	11.42	312545	7.48	12082	37.13
1 tag->n gene	4318	1.78	35428	0.85	5492	16.88	4300	1.79	29616	0.71	5687	17.48	4293	1.66	42909	1.03	5736	17.63
All Tag Mapping to Anti-Sense Gene	44225	18.26	230116	5.51	17713	54.43	48012	20.01	262619	6.29	18036	55.43	43940	16.95	299317	7.17	17979	55.25
Unambiguous Tag Mapping to Anti-Sense Gene	39174	16.18	198395	4.75	15043	46.23	42769	17.82	233482	5.59	15467	47.53	39198	15.12	251786	6.03	15282	46.96
Perfect Match(AntiSense)
1 tag->1 gene	31883	13.16	163253	3.91	14028	43.11	35376	14.74	203011	4.86	14555	44.73	30470	11.75	168773	4.04	14173	43.56
1 tag->n gene	3876	1.6	26177	0.63	5695	17.5	4101	1.71	24217	0.58	5739	17.64	3557	1.37	20679	0.5	5500	16.9
1bp MisMatch(AntiSense)
1 tag->1 gene	7291	3.01	35142	0.84	5246	16.12	7393	3.08	30471	0.73	5250	16.13	8728	3.37	83013	1.99	5713	17.56
1 tag->n gene	1175	0.49	5544	0.13	2124	6.53	1142	0.48	4920	0.12	2095	6.44	1185	0.46	26852	0.64	2070	6.36
Mapping to Mitochondrion
Perfect Match	127	0.05	953	0.02			120	0.05	692	0.02			120	0.05	1007	0.02
1bp Mismatch	38	0.02	67	0			33	0.01	85	0			45	0.02	239	0.01
Mapping to Chloroplast
Perfect Match	30	0.01	453	0.01			34	0.01	376	0.01			31	0.01	232	0.01
1bp Mismatch	14	0.01	36	0			10	0	19	0			24	0.01	368	0.01
Mapping to Genome
Perfect Match
1 tag->1 position	17305	7.15	297901	7.13			19815	8.26	335846	8.04			18265	7.04	262502	6.29
1 tag->n position	1122	0.46	14891	0.36			1178	0.49	17165	0.41			1097	0.42	13454	0.32
1bp Mismatch
1 tag->1 position	15758	6.51	131538	3.15			13987	5.83	111313	2.67			16769	6.47	183780	4.4
1 tag->n position	2712	1.12	29585	0.71			2294	0.96	22260	0.53			3330	1.28	53852	1.29
Unknown Tag	70700	29.19	721786	17.28			61016	25.43	561476	13.44			85152	32.84	894503	21.42
Copy Num >=1	70700	100	721786	100			61016	100	561476	100			85152	100	894503	100
Copy Num >5	10565	14.94	624547	86.53			7634	12.51	480815	85.63			15288	17.95	777711	86.94
Copy Num >10	6474	9.16	593828	82.27			4826	7.91	459707	81.87			9575	11.24	734626	82.13
Copy Num >20	3979	5.63	557434	77.23			2985	4.89	432815	77.09			5818	6.83	679661	75.98
Copy Num >50	1895	2.68	490832	68			1558	2.55	387195	68.96			2699	3.17	580303	64.87
Copy Num >100	1007	1.42	427680	59.25			890	1.46	340230	60.6			1375	1.61	487540	54.5
* Normalised tag copy number was calculated by dividing tag counts for each gene with the total number of tags generated for each library and are presented per one million transcripts.
§ 1 tag->1 gene represents that one tag has a single locus;1 tag->n gene represents that one tag showed ambiguous assignment to multiple loci.

## Sheet: Table S2
Table S2. Summary of antisense and sense transcripts.
Number of gene	F1	B73	Mo17
total	21372	20784	20938
Sense	20253	19753	19891
Antisense	15282	15043	15467
Overlap	14163	14012	14420
Antisense-specific	1119	1031	1047
Sense/Antisense	1.3253	1.3131	1.286

## Sheet: Table S3
Table S3. list of genes expressed collectively in three genotypes by mapping all distinct tags to the maize reference genome.
#gene identifier	F1_raw(4176622)	F1_norm(TPM)	B73_raw(4176825)	B73_norm(TPM)	Mo17_raw(4176752)	Mo17_norm(TPM)	Description	GO Component	GO Function	GO Process	blast nr	transcriptID
GRMZM2G071883	1	0.24	0	0	0	0	seq=gene; coord=4:222386165..222391363:-1;IPR001944:Glycoside hydrolase, family 35;IPR017853:Glycoside hydrolase, catalytic core;IPR008979:Galactose-binding like;IPR000922:D-galactoside/L-rhamnose binding SUEL lectin;IPR001944:Glycoside hydrolase, family 35;IPR008979:Galactose-binding like;IPR017853:Glycoside hydrolase, catalytic core;	GO:0016023//cytoplasmic membrane-bounded vesicle;GO:0016023//cytoplasmic membrane-bounded vesicle	-	-	gi|242081931|ref|XP_002445734.1|/0/hypothetical protein SORBIDRAFT_07g024870 [Sorghum bicolor]	GRMZM2G071883
AC205376.4_FG003	4	0.96	0	0	2	0.48	seq=gene; coord=4:86896778..86898051:-1	-	-	-	gi|242079185|ref|XP_002444361.1|/5.36411e-41/hypothetical protein SORBIDRAFT_07g020690 [Sorghum bicolor]	AC205376.4_FG003
GRMZM2G024563	6	1.44	0	0	0	0	seq=gene; coord=4:23493800..23508890:1	-	-	-	gi|293331841|ref|NP_001168901.1|/3.41884e-65/hypothetical protein LOC100382707 [Zea mays]	GRMZM2G024563
AC233865.1_FG006	5	1.2	0	0	3	0.72	seq=gene; coord=7:140975270..140978720:-1;IPR000504:RNA recognition motif, RNP-1	-	-	-	gi|242050110|ref|XP_002462799.1|/1.59935e-127/hypothetical protein SORBIDRAFT_02g032170 [Sorghum bicolor]	AC233865.1_FG006
GRMZM2G030710	234	56.03	600	143.65	803	192.25	seq=gene; coord=6:164617307..164622572:1;IPR003340:Transcriptional factor B3;IPR010525:Auxin response factor;	-	GO:0003677//DNA binding	GO:0006355//regulation of transcription, DNA-dependent	gi|242088827|ref|XP_002440246.1|/0/hypothetical protein SORBIDRAFT_09g028450 [Sorghum bicolor]	GRMZM2G030710
GRMZM2G005155	68	16.28	28	6.7	2	0.48	seq=gene; coord=2:10278374..10281325:-1;IPR002100:Transcription factor, MADS-box;IPR002487:Transcription factor, K-box;IPR002100:Transcription factor, MADS-box;IPR002487:Transcription factor, K-box;IPR002100:Transcription factor, MADS-box;IPR002487:Transcription factor, K-box;	-	-	-	gi|226503881|ref|NP_001140301.1|/3.94553e-135/hypothetical protein LOC100272346 [Zea mays]	GRMZM2G005155
GRMZM2G001272	262	62.73	358	85.71	134	32.08	seq=gene; coord=10:8335002..8342117:-1;IPR000007:Tubby, C-terminal;IPR018066:Tubby, C-terminal, conserved site;IPR001810:Cyclin-like F-box;IPR000007:Tubby, C-terminal;IPR018066:Tubby, C-terminal, conserved site;IPR001810:Cyclin-like F-box;IPR001810:Cyclin-like F-box;IPR000007:Tubby, C-terminal;	-	-	-	gi|238010258|gb|ACR36164.1|/1.24061e-106/unknown [Zea mays]	GRMZM2G001272
GRMZM2G111923	43	10.3	14	3.35	69	16.52	seq=gene; coord=4:145119485..145124978:1;IPR000104:Antifreeze protein, type I;IPR000104:Antifreeze protein, type I;	-	-	-	gi|226532548|ref|NP_001141861.1|/1.69004e-178/hypothetical protein LOC100274004 [Zea mays]	GRMZM2G111923
GRMZM2G073508	0	0	1	0.24	2	0.48	seq=gene; coord=1:286339369..286339854:-1	-	-	-	gi|195655059|gb|ACG46997.1|/8.53822e-43/hypothetical protein [Zea mays]	GRMZM2G073508
GRMZM2G142721	217	51.96	177	42.38	268	64.16	seq=gene; coord=7:4686219..4687206:-1;IPR006936:Protein of unknown function DUF640;	-	-	-	gi|226490815|ref|NP_001144926.1|/1.2382e-103/hypothetical protein LOC100278049 [Zea mays]	GRMZM2G142721
GRMZM2G098208	171	40.94	165	39.5	238	56.98	seq=gene; coord=1:89504006..89509692:1	GO:0005956//protein kinase CK2 complex;GO:0005956//protein kinase CK2 complex;GO:0005956//protein kinase CK2 complex;GO:0005956//protein kinase CK2 complex;GO:0005956//protein kinase CK2 complex	GO:0016301//kinase activity;GO:0008605//protein kinase CK2 regulator activity;GO:0016301//kinase activity;GO:0008605//protein kinase CK2 regulator activity;GO:0016301//kinase activity;GO:0008605//protein kinase CK2 regulator activity;GO:0016301//kinase activity;GO:0008605//protein kinase CK2 regulator activity;GO:0016301//kinase activity;GO:0008605//protein kinase CK2 regulator activity	-	gi|195610218|gb|ACG26939.1|/1.19208e-53/casein kinase II subunit beta-4 [Zea mays]	GRMZM2G098208
GRMZM2G092363	5	1.2	12	2.87	3	0.72	seq=gene; coord=10:38534924..38536330:-1;IPR000315:Zinc finger, B-box;IPR010402:CCT domain;	-	-	-	gi|226508042|ref|NP_001148275.1|/9.28792e-64/CONSTANS-like protein CO8 [Zea mays]	GRMZM2G092363
GRMZM2G023652	355	85	674	161.37	542	129.77	seq=gene; coord=2:223175575..223180049:1;IPR009675:Targeting for Xklp2;IPR009675:Targeting for Xklp2;	-	-	-	gi|226500402|ref|NP_001149997.1|/2.54558e-150/LOC100283624 [Zea mays]	GRMZM2G023652
GRMZM2G318123	0	0	1	0.24	0	0	seq=gene; coord=8:137554718..137556551:-1	-	-	-	gi|293336402|ref|NP_001170187.1|/4.76617e-66/hypothetical protein LOC100384135 [Zea mays]	GRMZM2G318123
GRMZM2G040600	0	0	0	0	1	0.24	seq=gene; coord=7:163557873..163563493:-1;IPR018282:Ribosomal protein S6e, conserved site;IPR001377:Ribosomal protein S6e;	GO:0005840//ribosome	GO:0003735//structural constituent of ribosome	GO:0006412//translation	gi|195618246|gb|ACG30953.1|/9.00538e-18/40S ribosomal protein S6 [Zea mays]	GRMZM2G040600
GRMZM2G027875	351	84.04	390	93.37	513	122.82	seq=gene; coord=5:155305108..155314495:1;IPR014782:Peptidase M1, membrane alanine aminopeptidase, N-terminal;	-	GO:0008238//exopeptidase activity	-	gi|242060970|ref|XP_002451774.1|/0/hypothetical protein SORBIDRAFT_04g007610 [Sorghum bicolor]	GRMZM2G027875
GRMZM2G029518	48	11.49	10	2.39	12	2.87	seq=gene; coord=1:235209093..235210213:-1;IPR000817:Prion protein;IPR008119:Dense granule Gra6 protein;IPR004692:Preprotein translocase SecG subunit;IPR005405:Potassium channel, voltage dependent, Kv3.4;	-	-	-	gi|226494015|ref|NP_001152444.1|/1.34357e-11/fibroin heavy chain [Zea mays]	GRMZM2G029518
GRMZM2G026580	12	2.87	132	31.6	124	29.69	seq=gene; coord=10:125637310..125642586:1;IPR001270:Chaperonin clpA/B;IPR003593:ATPase, AAA+ type, core;IPR012763:DNA polymerase III, subunits gamma and tau;IPR008921:DNA polymerase III clamp loader subunit, C-terminal;IPR010372:DNA polymerase III, delta;	-	-	-	gi|125536334|gb|EAY82822.1|/0/hypothetical protein OsI_38032 [Oryza sativa Indica Group]	GRMZM2G026580
GRMZM2G446201	1	0.24	16	3.83	1	0.24	seq=gene; coord=10:119158238..119159971:-1	-	-	-	gi|238009574|gb|ACR35822.1|/6.12931e-64/unknown [Zea mays]	GRMZM2G446201
GRMZM2G070323	2	0.48	3	0.72	6	1.44	seq=gene; coord=1:251799407..251814191:1;IPR006186:Serine/threonine-specific protein phosphatase and bis(5-nucleosyl)-tetraphosphatase;IPR012391:Serine/threonine protein phosphatase, BSU1;IPR011043:Galactose oxidase/kelch, beta-propeller;IPR011498:Kelch repeat type 2;IPR004843:Metallophosphoesterase;	-	-	-	gi|242033549|ref|XP_002464169.1|/0/hypothetical protein SORBIDRAFT_01g013460 [Sorghum bicolor]	GRMZM2G070323
GRMZM2G028366	0	0	0	0	3	0.72	seq=gene; coord=5:154383912..154392191:-1;IPR000629:RNA helicase, ATP-dependent, DEAD-box, conserved site;IPR000209:Peptidase S8 and S53, subtilisin, kexin, sedolisin;IPR001878:Zinc finger, CCHC-type;IPR014001:DEAD-like helicase, N-terminal;IPR001650:DNA/RNA helicase, C-terminal;IPR011545:DNA/RNA helicase, DEAD/DEAH box type, N-terminal;	-	GO:0016787//hydrolase activity;GO:0005488//binding	-	gi|242060998|ref|XP_002451788.1|/0/hypothetical protein SORBIDRAFT_04g007820 [Sorghum bicolor]	GRMZM2G028366
GRMZM2G004888	50	11.97	29	6.94	12	2.87	seq=gene; coord=6:160137799..160144414:-1;IPR002885:Pentatricopeptide repeat;	-	-	-	gi|222622177|gb|EEE56309.1|/0/hypothetical protein OsJ_05395 [Oryza sativa Japonica Group]	GRMZM2G004888
GRMZM2G037411	1	0.24	2	0.48	0	0	seq=gene; coord=7:159145753..159149005:-1;IPR002411:Cereal allergen/alpha-amylase inhibitor, rice-type;IPR011050:Pectin lyase fold/virulence factor;IPR018040:Pectinesterase, active site;IPR000070:Pectinesterase, catalytic;	GO:0016023//cytoplasmic membrane-bounded vesicle	-	-	gi|222637427|gb|EEE67559.1|/2.05177e-155/hypothetical protein OsJ_25062 [Oryza sativa Japonica Group]	GRMZM2G037411
GRMZM2G109821	249	59.62	152	36.39	364	87.15	seq=gene; coord=6:28760705..28774660:-1;IPR002912:Amino acid-binding ACT;IPR002912:Amino acid-binding ACT;IPR002912:Amino acid-binding ACT;	-	-	-	gi|195626784|gb|ACG35222.1|/0/amino acid binding protein [Zea mays]	GRMZM2G109821
AC212835.3_FG002	2	0.48	0	0	0	0	seq=gene; coord=2:20776450..20777213:1;IPR008972:Cupredoxin	-	-	-	gi|226509294|ref|NP_001149787.1|/6.2905e-66/blue copper protein [Zea mays]	AC212835.3_FG002
AC208110.2_FG001	2	0.48	10	2.39	4	0.96	seq=gene; coord=10:140307691..140310563:1;IPR003657:DNA-binding WRKY	-	-	-	gi|242074190|ref|XP_002447031.1|/1.85219e-180/hypothetical protein SORBIDRAFT_06g027290 [Sorghum bicolor]	AC208110.2_FG001
GRMZM2G119782	2775	664.41	700	167.59	346	82.84	seq=gene; coord=5:212538164..212539024:1;IPR001199:Cytochrome b5;	-	-	-	gi|226499414|ref|NP_001146971.1|/1.78145e-52/membrane steroid-binding protein 1 [Zea mays]	GRMZM2G119782
GRMZM2G117633	224	53.63	157	37.59	188	45.01	seq=gene; coord=10:116859650..116866465:1;IPR001810:Cyclin-like F-box;IPR001810:Cyclin-like F-box;	-	GO:0005515//protein binding;GO:0005515//protein binding	-	gi|223943813|gb|ACN25990.1|/1.16604e-177/unknown [Zea mays]	GRMZM2G117633
GRMZM2G091487	1	0.24	1	0.24	1	0.24	seq=gene; coord=5:5626183..5628015:-1	-	-	-	gi|194702832|gb|ACF85500.1|/4.6569e-146/unknown [Zea mays]	GRMZM2G091487
GRMZM2G469969	26	6.23	39	9.34	43	10.3	seq=gene; coord=2:143237809..143243863:1;IPR005571:RNA polymerase, Rpb5, N-terminal;	GO:0005739//mitochondrion	-	-	gi|293334619|ref|NP_001167748.1|/0/hypothetical protein LOC100381436 [Zea mays]	GRMZM2G469969
GRMZM2G151873	89	21.31	133	31.84	122	29.21	seq=gene; coord=1:291354552..291361752:-1	-	-	-	gi|194703586|gb|ACF85877.1|/3.84864e-69/unknown [Zea mays]	GRMZM2G151873
GRMZM2G320152	26	6.23	20	4.79	6	1.44	seq=gene; coord=6:44356154..44360747:-1;IPR002035:von Willebrand factor, type A;	-	-	-	gi|224029935|gb|ACN34043.1|/0/unknown [Zea mays]	GRMZM2G320152
GRMZM2G159935	2	0.48	1	0.24	0	0	seq=gene; coord=3:202873514..202874697:-1	-	-	-	gi|242054155|ref|XP_002456223.1|/3.4439e-21/hypothetical protein SORBIDRAFT_03g032390 [Sorghum bicolor]	GRMZM2G159935
GRMZM2G038365	7	1.68	27	6.46	12	2.87	seq=gene; coord=4:231897899..231899942:1;IPR005805:Rieske iron-sulphur protein, C-terminal;IPR005806:Rieske [2Fe-2S] region;IPR014909:Cytochrome b6-f complex Fe-S subunit;	GO:0045275//respiratory chain complex III;GO:0009536//plastid	-	-	gi|226503077|ref|NP_001140947.1|/6.15045e-119/hypothetical protein LOC100273026 [Zea mays]	GRMZM2G038365
GRMZM2G128228	85	20.35	33	7.9	92	22.03	seq=gene; coord=5:172989125..172990617:-1	-	-	-	gi|242065402|ref|XP_002453990.1|/9.96129e-127/hypothetical protein SORBIDRAFT_04g022810 [Sorghum bicolor]	GRMZM2G128228
GRMZM2G080509	130	31.13	132	31.6	111	26.58	seq=gene; coord=6:86575403..86580425:1;IPR000679:Zinc finger, GATA-type;IPR010399:Tify;IPR018467:CCT domain-like;IPR010402:CCT domain;IPR000679:Zinc finger, GATA-type;IPR010399:Tify;IPR018467:CCT domain-like;IPR010402:CCT domain;	-	-	-	gi|226507512|ref|NP_001148559.1|/1.69196e-132/GATA transcription factor 25 [Zea mays]	GRMZM2G080509
GRMZM2G412254	1	0.24	6	1.44	1	0.24	seq=gene; coord=9:119941747..119944535:-1	-	-	-	gi|212275704|ref|NP_001130069.1|/5.48799e-23/hypothetical protein LOC100191162 [Zea mays]	GRMZM2G412254
GRMZM2G063156	23	5.51	29	6.94	14	3.35	seq=gene; coord=3:40116132..40117041:-1;IPR000104:Antifreeze protein, type I;	-	-	-	-	GRMZM2G063156
GRMZM2G009136	117	28.01	121	28.97	159	38.07	seq=gene; coord=2:175999942..176005069:-1;IPR001464:Annexin;IPR018252:Annexin repeat, conserved site;IPR018502:Annexin repeat;	-	-	-	gi|226508140|ref|NP_001149599.1|/0/annexin A4 [Zea mays]	GRMZM2G009136
GRMZM2G054023	2	0.48	0	0	0	0	seq=gene; coord=5:135147393..135149558:1;IPR001245:Tyrosine protein kinase;IPR017441:Protein kinase, ATP binding site;IPR008271:Serine/threonine protein kinase, active site;IPR002290:Serine/threonine protein kinase;IPR011009:Protein kinase-like;IPR008985:Concanavalin A-like lectin/glucanase;IPR001220:Legume lectin, beta domain;IPR017442:Serine/threonine protein kinase-related;	GO:0016023//cytoplasmic membrane-bounded vesicle;GO:0016020//membrane	-	-	gi|242080543|ref|XP_002445040.1|/0/hypothetical protein SORBIDRAFT_07g003240 [Sorghum bicolor]	GRMZM2G054023
AC165178.2_FG004	1	0.24	3	0.72	2	0.48	seq=gene; coord=2:178522488..178523696:-1;IPR001859:Ribosomal protein P2	-	-	-	gi|242044676|ref|XP_002460209.1|/2.06726e-93/hypothetical protein SORBIDRAFT_02g024640 [Sorghum bicolor]	AC165178.2_FG004
GRMZM2G174797	45	10.77	67	16.04	109	26.1	seq=gene; coord=4:184790979..184795351:1;IPR006816:Engulfment and cell motility, ELMO;IPR006816:Engulfment and cell motility, ELMO;	-	-	-	gi|293335866|ref|NP_001169373.1|/2.75377e-177/hypothetical protein LOC100383240 [Zea mays]	GRMZM2G174797
AC235534.1_FG002	1	0.24	1	0.24	2	0.48	seq=gene; coord=10:136600759..136604782:1;IPR011016:Zinc finger, RING-CH-type	GO:0009536//plastid;GO:0016020//membrane	-	-	gi|219884153|gb|ACL52451.1|/1.3719e-99/unknown [Zea mays]	AC235534.1_FG002
GRMZM2G462417	1	0.24	0	0	0	0	seq=gene; coord=4:184703947..184706988:1;IPR006456:ZF-HD homeobox protein Cys/His-rich dimerisation region;IPR002885:Pentatricopeptide repeat;	-	-	-	gi|242067301|ref|XP_002448927.1|/0/hypothetical protein SORBIDRAFT_05g001710 [Sorghum bicolor]	GRMZM2G462417
GRMZM2G056442	4	0.96	4	0.96	0	0	seq=gene; coord=4:113084241..113092413:1;IPR001611:Leucine-rich repeat;	-	-	-	gi|242061914|ref|XP_002452246.1|/1.26587e-160/hypothetical protein SORBIDRAFT_04g022320 [Sorghum bicolor]	GRMZM2G056442
AC209784.3_FG011	2	0.48	5	1.2	8	1.92	seq=gene; coord=3:179215220..179218017:1;IPR006578:MADF domain	-	-	-	gi|242059195|ref|XP_002458743.1|/9.17996e-130/hypothetical protein SORBIDRAFT_03g039440 [Sorghum bicolor]	AC209784.3_FG011
GRMZM2G337229	3	0.72	2	0.48	1	0.24	seq=gene; coord=2:20721969..20723938:1;IPR000136:Oleosin;	GO:0012511//monolayer-surrounded lipid storage body;GO:0016020//membrane	-	-	gi|195658177|gb|ACG48556.1|/6.66103e-89/oleosin 16 kDa [Zea mays]	GRMZM2G337229
GRMZM2G134544	19	4.55	20	4.79	43	10.3	seq=gene; coord=1:181716328..181719775:-1;IPR001898:Sodium/sulphate symporter;	GO:0016020//membrane;GO:0009536//plastid	GO:0005215//transporter activity	GO:0006814//sodium ion transport	gi|194708434|gb|ACF88301.1|/3.41574e-158/unknown [Zea mays]	GRMZM2G134544
GRMZM2G108273	155	37.11	114	27.29	37	8.86	seq=gene; coord=8:109377423..109379836:-1;IPR000425:Major intrinsic protein;IPR000425:Major intrinsic protein;	GO:0005774//vacuolar membrane;GO:0016021//integral to membrane;GO:0016020//membrane;GO:0005773//vacuole	GO:0005215//transporter activity	GO:0006810//transport	gi|242087301|ref|XP_002439483.1|/1.06919e-130/hypothetical protein SORBIDRAFT_09g007940 [Sorghum bicolor]	GRMZM2G108273
GRMZM2G077596	80	19.15	215	51.47	203	48.6	seq=gene; coord=1:299307360..299320256:1	-	-	-	gi|242037319|ref|XP_002466054.1|/0/hypothetical protein SORBIDRAFT_01g000280 [Sorghum bicolor]	GRMZM2G077596
GRMZM2G314386	12	2.87	17	4.07	21	5.03	seq=gene; coord=2:14458442..14462277:-1;IPR001806:Ras GTPase;IPR006073:GTP1/OBG;IPR003579:Ras small GTPase, Rab type;IPR013684:Miro-like;IPR006073:GTP1/OBG;	-	-	-	gi|226494045|ref|NP_001141046.1|/0/hypothetical protein LOC100273127 [Zea mays]	GRMZM2G314386
AC217977.3_FG001	5	1.2	0	0	0	0	seq=gene; coord=1:219919276..219920013:-1;IPR005018:DOMON related	-	-	-	gi|242078865|ref|XP_002444201.1|/3.13693e-81/hypothetical protein SORBIDRAFT_07g014900 [Sorghum bicolor]	AC217977.3_FG001
GRMZM2G060465	0	0	0	0	1	0.24	seq=gene; coord=4:183925629..183926452:-1;IPR001471:Pathogenesis-related transcriptional factor and ERF, DNA-binding;IPR016177:DNA-binding, integrase-type;	-	-	-	gi|242069759|ref|XP_002450156.1|/2.40078e-59/hypothetical protein SORBIDRAFT_05g001280 [Sorghum bicolor]	GRMZM2G060465
GRMZM2G032840	256	61.29	318	76.13	295	70.63	seq=gene; coord=2:34805682..34824410:-1;IPR006093:Oxygen oxidoreductase covalent FAD-binding site;IPR001876:Zinc finger, RanBP2-type;IPR001841:Zinc finger, RING-type;IPR002867:Zinc finger, C6HC-type;IPR001878:Zinc finger, CCHC-type;	GO:0016020//membrane	-	-	gi|242073556|ref|XP_002446714.1|/0/hypothetical protein SORBIDRAFT_06g021080 [Sorghum bicolor]	GRMZM2G032840
GRMZM2G427635	0	0	1	0.24	0	0	seq=gene; coord=1:163127659..163138905:-1	-	-	-	gi|242083974|ref|XP_002442412.1|/0/hypothetical protein SORBIDRAFT_08g019590 [Sorghum bicolor]	GRMZM2G427635
GRMZM2G160454	112	26.82	31	7.42	24	5.75	seq=gene; coord=1:99441935..99448056:-1;IPR003591:Leucine-rich repeat, typical subtype;IPR001611:Leucine-rich repeat;IPR003591:Leucine-rich repeat, typical subtype;IPR001611:Leucine-rich repeat;IPR003591:Leucine-rich repeat, typical subtype;IPR001611:Leucine-rich repeat;	-	-	-	gi|226531494|ref|NP_001147848.1|/0/LOC100281458 [Zea mays]	GRMZM2G160454
AC234164.1_FG004	1	0.24	3	0.72	1	0.24	seq=gene; coord=9:24926044..24928503:1;IPR005202:GRAS transcription factor	-	-	-	gi|242091800|ref|XP_002436390.1|/0/hypothetical protein SORBIDRAFT_10g001690 [Sorghum bicolor]	AC234164.1_FG004
GRMZM2G432746	8	1.92	48	11.49	77	18.44	seq=gene; coord=1:299813229..299815681:-1;IPR006634:TRAM, LAG1 and CLN8 homology;IPR006634:TRAM, LAG1 and CLN8 homology;IPR006634:TRAM, LAG1 and CLN8 homology;	-	-	-	gi|194700028|gb|ACF84098.1|/1.85235e-127/unknown [Zea mays]	GRMZM2G432746
GRMZM2G133885	15	3.59	32	7.66	40	9.58	seq=gene; coord=8:156063263..156070780:1;IPR005221:Phosphatidylserine decarboxylase;IPR003817:Phosphatidylserine decarboxylase-related;	-	-	-	gi|226499906|ref|NP_001143081.1|/0/hypothetical protein LOC100275554 [Zea mays]	GRMZM2G133885
GRMZM2G173739	2	0.48	1	0.24	0	0	seq=gene; coord=8:164922811..164925833:1	GO:0016020//membrane	-	-	gi|195625918|gb|ACG34789.1|/7.42196e-69/hypothetical protein [Zea mays]	GRMZM2G173739
GRMZM2G179253	10	2.39	9	2.15	4	0.96	seq=gene; coord=2:40960954..40963995:-1	GO:0005739//mitochondrion	-	-	gi|259489932|ref|NP_001159120.1|/1.08959e-118/hypothetical protein LOC100304196 [Zea mays]	GRMZM2G179253
GRMZM2G111304	27	6.46	50	11.97	83	19.87	seq=gene; coord=4:242563685..242568893:-1;IPR005061:Protein of unknown function DUF292, eukaryotic;	-	-	-	gi|195608494|gb|ACG26077.1|/1.58058e-09/hypothetical protein [Zea mays]	GRMZM2G111304
GRMZM2G064031	20	4.79	18	4.31	11	2.63	seq=gene; coord=3:225467719..225475485:1;IPR003095:Heat shock protein DnaJ;IPR000381:Inhibin, beta B subunit;IPR001623:Heat shock protein DnaJ, N-terminal;IPR018253:Heat shock protein DnaJ, conserved site;IPR015399:Protein of unknown function DUF1977, DnaJ-like;IPR003095:Heat shock protein DnaJ;IPR000381:Inhibin, beta B subunit;IPR001623:Heat shock protein DnaJ, N-terminal;IPR015399:Protein of un…	-	-	-	gi|223947879|gb|ACN28023.1|/2.27e-169/unknown [Zea mays]	GRMZM2G064031
GRMZM2G012391	917	219.56	471	112.77	754	180.52	seq=gene; coord=4:193201336..193204819:-1;IPR002401:Cytochrome P450, E-class, group I;IPR017973:Cytochrome P450, C-terminal region;IPR002403:Cytochrome P450, E-class, group IV;IPR017972:Cytochrome P450, conserved site;IPR001128:Cytochrome P450;IPR002401:Cytochrome P450, E-class, group I;IPR017973:Cytochrome P450, C-terminal region;IPR002403:Cytochrome P450, E-class, group IV;IPR001128:Cytochrome …	GO:0016023//cytoplasmic membrane-bounded vesicle;GO:0016023//cytoplasmic membrane-bounded vesicle;GO:0016023//cytoplasmic membrane-bounded vesicle;GO:0016023//cytoplasmic membrane-bounded vesicle	-	-	gi|224028631|gb|ACN33391.1|/0/unknown [Zea mays]	GRMZM2G012391
GRMZM2G053315	0	0	0	0	2	0.48	seq=gene; coord=7:141550029..141552252:1;IPR000960:Flavin-containing monooxygenase FMO;IPR013027:FAD-dependent pyridine nucleotide-disulphide oxidoreductase;IPR000759:Adrenodoxin reductase;IPR012143:Dimethylaniline monooxygenase, N-oxide-forming;	-	-	-	gi|242050080|ref|XP_002462784.1|/0/hypothetical protein SORBIDRAFT_02g031940 [Sorghum bicolor]	GRMZM2G053315
GRMZM2G126239	0	0	3	0.72	1	0.24	seq=gene; coord=3:213282365..213286757:1;IPR000047:Helix-turn-helix motif, lambda-like repressor;IPR017970:Homeobox, conserved site;IPR001356:Homeobox;IPR003106:Leucine zipper, homeobox-associated;IPR009057:Homeodomain-like;	GO:0005634//nucleus	GO:0043565//sequence-specific DNA binding;GO:0003700//transcription factor activity	GO:0006355//regulation of transcription, DNA-dependent	gi|226503413|ref|NP_001150230.1|/1.63512e-81/homeobox-leucine zipper protein ATHB-4 [Zea mays]	GRMZM2G126239
GRMZM2G080487	2	0.48	0	0	0	0	seq=gene; coord=3:160631248..160632461:1	-	-	-	gi|194705312|gb|ACF86740.1|/1.00291e-53/unknown [Zea mays]	GRMZM2G080487
GRMZM2G337389	3	0.72	1	0.24	2	0.48	seq=gene; coord=10:38224549..38236430:1;IPR004159:Protein of unknown function DUF248, methyltransferase putative;	GO:0016023//cytoplasmic membrane-bounded vesicle	-	-	gi|242096822|ref|XP_002438901.1|/1.28842e-89/hypothetical protein SORBIDRAFT_10g027910 [Sorghum bicolor]	GRMZM2G337389
GRMZM2G440614	195	46.69	144	34.48	314	75.18	seq=gene; coord=3:38267800..38273455:1	GO:0009536//plastid;GO:0009536//plastid	-	-	gi|226494321|ref|NP_001146585.1|/0/hypothetical protein LOC100280181 [Zea mays]	GRMZM2G440614
GRMZM2G034575	93	22.27	81	19.39	152	36.39	seq=gene; coord=9:142109937..142116442:1;IPR017853:Glycoside hydrolase, catalytic core;IPR000322:Glycoside hydrolase, family 31;IPR000322:Glycoside hydrolase, family 31;IPR000322:Glycoside hydrolase, family 31;IPR001402:Prolactin-releasing peptide receptor;	-	-	-	gi|226499640|ref|NP_001145786.1|/7.78429e-151/hypothetical protein LOC100279293 [Zea mays]	GRMZM2G034575
GRMZM2G090300	34	8.14	185	44.29	35	8.38	seq=gene; coord=6:155955003..155957191:-1;IPR004853:Protein of unknown function DUF250;IPR004853:Protein of unknown function DUF250;IPR004853:Protein of unknown function DUF250;	GO:0016020//membrane;GO:0016020//membrane;GO:0016020//membrane	-	-	gi|195625058|gb|ACG34359.1|/6.56393e-161/plastidic phosphate translocator-like protein1 [Zea mays]	GRMZM2G090300
GRMZM2G002124	5	1.2	4	0.96	4	0.96	seq=gene; coord=5:215144144..215146054:1;IPR001245:Tyrosine protein kinase;IPR002290:Serine/threonine protein kinase;IPR011009:Protein kinase-like;IPR001245:Tyrosine protein kinase;IPR002290:Serine/threonine protein kinase;IPR011009:Protein kinase-like;	-	-	-	gi|242063532|ref|XP_002453055.1|/4.06007e-148/hypothetical protein SORBIDRAFT_04g037490 [Sorghum bicolor]	GRMZM2G002124
GRMZM2G037064	134	32.08	171	40.94	259	62.01	seq=gene; coord=10:2226127..2229214:-1	-	-	-	gi|194706984|gb|ACF87576.1|/2.73321e-123/unknown [Zea mays]	GRMZM2G037064
GRMZM2G001652	109	26.1	119	28.49	118	28.25	seq=gene; coord=7:83718639..83728801:-1;IPR008528:Protein of unknown function DUF810;	-	-	-	gi|242049030|ref|XP_002462259.1|/0/hypothetical protein SORBIDRAFT_02g022610 [Sorghum bicolor]	GRMZM2G001652
GRMZM2G124276	26	6.23	32	7.66	54	12.93	seq=gene; coord=9:4785327..4787687:1;IPR006694:Fatty acid hydroxylase;	GO:0016023//cytoplasmic membrane-bounded vesicle	-	GO:0008152//metabolic process	gi|238007766|gb|ACR34918.1|/9.72e-155/unknown [Zea mays]	GRMZM2G124276
GRMZM2G014975	701	167.84	3	0.72	109	26.1	seq=gene; coord=4:27873356..27874819:-1;IPR004241:Light chain 3 (LC3);IPR004241:Light chain 3 (LC3);	-	-	-	gi|221137698|ref|NP_001137496.1|/5.60617e-54/autophagy-related 8e [Zea mays]	GRMZM2G014975
GRMZM2G072894	27	6.46	42	10.06	258	61.77	seq=gene; coord=5:859429..864722:1	-	-	-	gi|242032189|ref|XP_002463489.1|/0/hypothetical protein SORBIDRAFT_01g000700 [Sorghum bicolor]	GRMZM2G072894
GRMZM2G449200	95	22.75	73	17.48	154	36.87	seq=gene; coord=2:150981673..150984360:1	-	-	-	gi|125563031|gb|EAZ08411.1|/0/hypothetical protein OsI_30675 [Oryza sativa Indica Group]	GRMZM2G449200
GRMZM2G046676	71	17	112	26.81	759	181.72	seq=gene; coord=5:17751721..17755423:-1;IPR005024:Snf7;IPR005024:Snf7;	-	-	-	gi|224034829|gb|ACN36490.1|/3.81735e-107/unknown [Zea mays]	GRMZM2G046676
GRMZM2G160224	0	0	2	0.48	0	0	seq=gene; coord=1:25700051..25702632:1	-	-	-	gi|242041795|ref|XP_002468292.1|/7.12589e-34/hypothetical protein SORBIDRAFT_01g043110 [Sorghum bicolor]	GRMZM2G160224
GRMZM2G014154	397	95.05	336	80.44	327	78.29	seq=gene; coord=2:162585791..162589017:-1;IPR008207:Signal transduction histidine kinase, phosphotransfer (Hpt) region;IPR008207:Signal transduction histidine kinase, phosphotransfer (Hpt) region;IPR008207:Signal transduction histidine kinase, phosphotransfer (Hpt) region;IPR008207:Signal transduction histidine kinase, phosphotransfer (Hpt) region;IPR008207:Signal transduction histidine kinase, p…	GO:0016023//cytoplasmic membrane-bounded vesicle;GO:0016023//cytoplasmic membrane-bounded vesicle;GO:0016023//cytoplasmic membrane-bounded vesicle;GO:0016023//cytoplasmic membrane-bounded vesicle	GO:0004871//signal transducer activity;GO:0004871//signal transducer activity;GO:0004871//signal transducer activity	GO:0000160//two-component signal transduction system (phosphorelay);GO:0000160//two-component signal transduction system (phosphorelay);GO:0000160//two-component signal transduction system (phosphorelay)	gi|162458273|ref|NP_001104850.1|/2.40608e-62/histidine-containing phosphotransfer protein2 [Zea mays]	GRMZM2G014154
GRMZM2G302882	2	0.48	5	1.2	1	0.24	seq=gene; coord=10:17169889..17172999:1	GO:0005739//mitochondrion;GO:0016020//membrane	-	-	gi|226529302|ref|NP_001144216.1|/0/hypothetical protein LOC100277078 [Zea mays]	GRMZM2G302882
GRMZM2G356718	0	0	2	0.48	0	0	seq=gene; coord=1:280838231..280844005:-1;IPR001005:SANT, DNA-binding;IPR001932:Protein phosphatase 2C-related;IPR009057:Homeodomain-like;IPR014778:Myb, DNA-binding;	-	-	-	gi|226503829|ref|NP_001141115.1|/4.68258e-42/hypothetical protein LOC100273199 [Zea mays]	GRMZM2G356718
GRMZM2G324727	33	7.9	28	6.7	32	7.66	seq=gene; coord=8:112073360..112097860:-1;IPR011009:Protein kinase-like;IPR009071:High mobility group, superfamily;IPR008266:Tyrosine protein kinase, active site;IPR002290:Serine/threonine protein kinase;	-	-	-	gi|238006820|gb|ACR34445.1|/6.15887e-84/unknown [Zea mays]	GRMZM2G324727
GRMZM2G043773	3	0.72	4	0.96	5	1.2	seq=gene; coord=7:157668397..157678632:1;IPR011629:Cobalamin (vitamin B12) biosynthesis CobW-like, C-terminal;IPR003495:Cobalamin (vitamin B12) biosynthesis CobW-like;IPR011629:Cobalamin (vitamin B12) biosynthesis CobW-like, C-terminal;IPR003495:Cobalamin (vitamin B12) biosynthesis CobW-like;IPR011629:Cobalamin (vitamin B12) biosynthesis CobW-like, C-terminal;IPR003495:Cobalamin (vitamin B12) bio…	-	-	-	gi|219363369|ref|NP_001136727.1|/2.04685e-154/hypothetical protein LOC100216864 [Zea mays]	GRMZM2G043773
GRMZM2G039650	101	24.18	89	21.31	80	19.15	seq=gene; coord=3:175916880..175930956:1;IPR004274:NLI interacting factor;IPR001159:Double-stranded RNA binding;IPR004274:NLI interacting factor;IPR001159:Double-stranded RNA binding;	-	GO:0005515//protein binding;GO:0005515//protein binding	-	gi|293334643|ref|NP_001168634.1|/0/hypothetical protein LOC100382420 [Zea mays]	GRMZM2G039650
GRMZM2G029912	118	28.25	79	18.91	121	28.97	seq=gene; coord=9:102124848..102131445:1;IPR016040:NAD(P)-binding;IPR016040:NAD(P)-binding;IPR006694:Fatty acid hydroxylase;IPR006694:Fatty acid hydroxylase;	GO:0016020//membrane;GO:0005783//endoplasmic reticulum;GO:0016020//membrane;GO:0016020//membrane	GO:0016491//oxidoreductase activity;GO:0005506//iron ion binding;GO:0005488//binding;GO:0003824//catalytic activity	GO:0006633//fatty acid biosynthetic process;GO:0055114//oxidation reduction;GO:0008152//metabolic process;GO:0008152//metabolic process	gi|195647274|gb|ACG43105.1|/0/gl1 protein [Zea mays]	GRMZM2G029912
GRMZM2G101179	55	13.17	59	14.13	105	25.14	seq=gene; coord=10:145892478..145895030:-1;IPR000104:Antifreeze protein, type I;IPR005819:Histone H5;IPR010301:Nucleolar, Nop52;IPR000104:Antifreeze protein, type I;IPR005819:Histone H5;IPR010301:Nucleolar, Nop52;	-	-	-	gi|293336367|ref|NP_001168446.1|/0/hypothetical protein LOC100382218 [Zea mays]	GRMZM2G101179
GRMZM2G120302	2	0.48	5	1.2	4	0.96	seq=gene; coord=9:7509816..7517230:1;IPR001844:Chaperonin Cpn60;IPR001375:Peptidase S9, prolyl oligopeptidase active site region;	-	-	-	gi|226506266|ref|NP_001152650.1|/0/acylaminoacyl-peptidase1 [Zea mays]	GRMZM2G120302
GRMZM2G113473	102	24.42	142	34	0	0	seq=gene; coord=9:142930436..142931761:-1;IPR013179:Protein of unknown function DUF1715, eukaryotic;	-	-	-	gi|195645272|gb|ACG42104.1|/9.23134e-77/oral cancer overexpressed protein 1 [Zea mays]	GRMZM2G113473
GRMZM2G323936	81	19.39	201	48.12	199	47.64	seq=gene; coord=3:130299812..130302534:1;IPR008936:Rho GTPase activation protein;IPR000198:RhoGAP;IPR000095:PAK-box/P21-Rho-binding;IPR000198:RhoGAP;IPR008936:Rho GTPase activation protein;	-	-	-	gi|226504252|ref|NP_001151189.1|/4.01222e-178/LOC100284822 [Zea mays]	GRMZM2G323936
GRMZM2G136072	40	9.58	36	8.62	25	5.99	seq=gene; coord=8:23107079..23109031:1;IPR006036:Potassium uptake protein TrkA;IPR016040:NAD(P)-binding;IPR006139:D-isomer specific 2-hydroxyacid dehydrogenase, catalytic region;IPR006140:D-isomer specific 2-hydroxyacid dehydrogenase, NAD-binding;	-	-	-	gi|226528854|ref|NP_001147169.1|/1.69522e-121/glyoxylate reductase [Zea mays]	GRMZM2G136072
GRMZM2G052671	38	9.1	18	4.31	31	7.42	seq=gene; coord=2:186375389..186379423:-1;IPR003657:DNA-binding WRKY;IPR003657:DNA-binding WRKY;	-	-	-	gi|293334221|ref|NP_001170182.1|/0/hypothetical protein LOC100384128 [Zea mays]	GRMZM2G052671
GRMZM2G047178	23	5.51	38	9.1	47	11.25	seq=gene; coord=9:43127331..43134558:1;IPR006745:Protein of unknown function DUF605;	-	GO:0005515//protein binding;GO:0005515//protein binding	-	gi|242092906|ref|XP_002436943.1|/0/hypothetical protein SORBIDRAFT_10g011810 [Sorghum bicolor]	GRMZM2G047178
GRMZM2G040079	35	8.38	79	18.91	94	22.51	seq=gene; coord=7:133810224..133818466:1;IPR001487:Bromodomain;IPR018359:Bromodomain, conserved site;IPR003960:ATPase, AAA-type, conserved site;IPR014001:DEAD-like helicase, N-terminal;IPR003593:ATPase, AAA+ type, core;IPR003959:ATPase, AAA-type, core;IPR011704:ATPase associated with various cellular activities, AAA-5;	-	GO:0005524//ATP binding;GO:0017111//nucleoside-triphosphatase activity	-	gi|162459424|ref|NP_001105102.1|/0/bromodomain protein 103 [Zea mays]	GRMZM2G040079
GRMZM2G048616	48	11.49	69	16.52	142	34	seq=gene; coord=1:182239000..182241455:1;IPR004136:2-nitropropane dioxygenase, NPD;	-	-	-	gi|212274339|ref|NP_001130207.1|/0/hypothetical protein LOC100191301 [Zea mays]	GRMZM2G048616
GRMZM2G031568	10	2.39	27	6.46	8	1.92	seq=gene; coord=3:66918082..66923491:1	GO:0009536//plastid	-	-	gi|242052949|ref|XP_002455620.1|/0/hypothetical protein SORBIDRAFT_03g014690 [Sorghum bicolor]	GRMZM2G031568
GRMZM2G322287	18	4.31	20	4.79	38	9.1	seq=gene; coord=8:124154150..124154933:-1	-	-	-	gi|242089657|ref|XP_002440661.1|/8.18095e-65/hypothetical protein SORBIDRAFT_09g004740 [Sorghum bicolor]	GRMZM2G322287
GRMZM2G018806	0	0	7	1.68	6	1.44	seq=gene; coord=3:24868200..24868939:1	GO:0009536//plastid	-	-	gi|238006602|gb|ACR34336.1|/3.5006e-48/unknown [Zea mays]	GRMZM2G018806
GRMZM2G135044	70	16.76	14	3.35	35	8.38	seq=gene; coord=9:27123322..27125185:-1;IPR002198:Short-chain dehydrogenase/reductase SDR;IPR000620:Protein of unknown function DUF6, transmembrane;IPR004853:Protein of unknown function DUF250;	-	-	-	gi|226532118|ref|NP_001140317.1|/2.32792e-129/hypothetical protein LOC100272362 [Zea mays]	GRMZM2G135044
GRMZM2G084762	11	2.63	5	1.2	59	14.13	seq=gene; coord=3:131724742..131728198:1;IPR001553:RecA bacterial DNA recombination;IPR003583:Helix-hairpin-helix DNA-binding motif, class 1;IPR003593:ATPase, AAA+ type, core;IPR011941:DNA repair protein RAD51;IPR016467:DNA repair and recombination, RecA-like;IPR011260:RNA polymerase, alpha subunit, C-terminal;IPR013632:Rad51, C-terminal;	GO:0005634//nucleus	GO:0008094//DNA-dependent ATPase activity;GO:0043565//sequence-specific DNA binding;GO:0005515//protein binding;GO:0005524//ATP binding;GO:0003684//damaged DNA binding	GO:0006310//DNA recombination;GO:0006281//DNA repair	gi|162457934|ref|NP_001104919.1|/0/recombination protein51 gene b [Zea mays]	GRMZM2G084762
GRMZM2G141244	2	0.48	0	0	0	0	seq=gene; coord=1:286926692..286929069:-1;IPR017907:Zinc finger, RING-type, conserved site;IPR001841:Zinc finger, RING-type;IPR002867:Zinc finger, C6HC-type;	-	-	-	gi|242067153|ref|XP_002448853.1|/2.15959e-94/hypothetical protein SORBIDRAFT_05g000320 [Sorghum bicolor]	GRMZM2G141244
GRMZM2G084014	5	1.2	2	0.48	7	1.68	seq=gene; coord=7:126855495..126860866:1;IPR003882:Pistil-specific extensin-like protein;IPR007087:Zinc finger, C2H2-type;IPR008162:Inorganic pyrophosphatase;IPR015880:Zinc finger, C2H2-like;	GO:0016023//cytoplasmic membrane-bounded vesicle	-	-	gi|226497084|ref|NP_001144611.1|/1.3148e-148/hypothetical protein LOC100277627 [Zea mays]	GRMZM2G084014
GRMZM2G101689	163	39.03	221	52.91	89	21.31	seq=gene; coord=1:60926894..60931182:1;IPR001632:G-protein, beta subunit;IPR011046:WD40 repeat-like;IPR014906:Pre-mRNA processing factor 4 (PRP4) like;IPR001680:WD40 repeat;IPR003648:Splicing factor motif;	GO:0044424//intracellular part	-	-	gi|226528469|ref|NP_001146287.1|/0/hypothetical protein LOC100279862 [Zea mays]	GRMZM2G101689
GRMZM2G442555	461	110.38	66	15.8	232	55.55	seq=gene; coord=2:162014622..162015662:1;IPR000558:Histone H2B;IPR009072:Histone-fold;IPR007125:Histone core;	GO:0005694//chromosome;GO:0005634//nucleus	GO:0003677//DNA binding	GO:0006334//nucleosome assembly	gi|242048528|ref|XP_002462010.1|/6.5554e-58/hypothetical protein SORBIDRAFT_02g012500 [Sorghum bicolor]	GRMZM2G442555
GRMZM2G076128	43	10.3	90	21.55	107	25.62	seq=gene; coord=10:56130936..56144063:1;IPR010492:GINS complex, Psf3 component;	-	-	-	gi|226505556|ref|NP_001147271.1|/2.13067e-108/TTN10 [Zea mays]	GRMZM2G076128
GRMZM2G065596	14	3.35	10	2.39	12	2.87	seq=gene; coord=6:51665987..51669307:1	GO:0005739//mitochondrion	-	-	gi|94502659|ref|YP_588302.1|/2.42371e-61/hypothetical protein ZeamMp040 [Zea mays subsp. mays]	GRMZM2G065596
GRMZM2G097068	184	44.05	206	49.32	302	72.3	seq=gene; coord=3:126244364..126262326:1	-	-	-	gi|242085820|ref|XP_002443335.1|/0/hypothetical protein SORBIDRAFT_08g017700 [Sorghum bicolor]	GRMZM2G097068
GRMZM2G098527	19	4.55	22	5.27	25	5.99	seq=gene; coord=4:205578967..205580975:1	-	-	-	gi|226500362|ref|NP_001144226.1|/1.9394e-52/hypothetical protein LOC100277090 [Zea mays]	GRMZM2G098527
GRMZM2G099305	5	1.2	10	2.39	99	23.7	seq=gene; coord=1:278905986..278908884:1;IPR016181:Acyl-CoA N-acyltransferase;IPR000182:GCN5-related N-acetyltransferase;	-	-	-	gi|293334001|ref|NP_001170084.1|/7.06151e-17/hypothetical protein LOC100384002 [Zea mays]	GRMZM2G099305
GRMZM2G057247	16	3.83	14	3.35	6	1.44	seq=gene; coord=7:156436280..156442676:1;IPR017997:Vinculin;IPR003980:Histamine H3 receptor;IPR001859:Ribosomal protein P2;IPR001904:Paxillin;IPR000104:Antifreeze protein, type I;IPR015425:Actin-binding FH2;IPR003104:Actin-binding FH2 and DRF autoregulatory;	GO:0016023//cytoplasmic membrane-bounded vesicle	-	-	gi|242046148|ref|XP_002460945.1|/0/hypothetical protein SORBIDRAFT_02g037970 [Sorghum bicolor]	GRMZM2G057247
GRMZM2G320319	17	4.07	16	3.83	10	2.39	seq=gene; coord=1:55187742..55188323:-1	-	-	-	gi|293333446|ref|NP_001168611.1|/1.86603e-60/hypothetical protein LOC100382395 [Zea mays]	GRMZM2G320319
GRMZM2G016066	150	35.91	114	27.29	85	20.35	seq=gene; coord=2:166681110..166682193:-1;IPR008990:Electron transport accessory protein;IPR003375:Photosystem I reaction centre subunit IV/PsaE;IPR008990:Electron transport accessory protein;IPR003375:Photosystem I reaction centre subunit IV/PsaE;	-	-	-	gi|226503797|ref|NP_001149700.1|/7.85056e-50/photosystem I reaction center subunit IV A [Zea mays]	GRMZM2G016066
GRMZM2G086906	356	85.24	521	124.74	57	13.65	seq=gene; coord=9:10235783..10236651:-1;IPR001210:Ribosomal protein S17e;	-	-	-	gi|226506574|ref|NP_001149330.1|/2.43528e-73/40S ribosomal protein S17-4 [Zea mays]	GRMZM2G086906
GRMZM2G077131	38	9.1	53	12.69	28	6.7	seq=gene; coord=1:254045814..254048882:1;IPR016027:Nucleic acid-binding, OB-fold-like;IPR000424:Primosome PriB/single-strand DNA-binding;IPR016027:Nucleic acid-binding, OB-fold-like;IPR000424:Primosome PriB/single-strand DNA-binding;	-	-	-	gi|223942215|gb|ACN25191.1|/3.85943e-94/unknown [Zea mays]	GRMZM2G077131
GRMZM2G368411	1	0.24	5	1.2	6	1.44	seq=gene; coord=3:169227245..169230042:-1;IPR002283:Isopenicillin N synthase;IPR005123:2OG-Fe(II) oxygenase;	-	-	-	gi|242055211|ref|XP_002456751.1|/0/hypothetical protein SORBIDRAFT_03g041900 [Sorghum bicolor]	GRMZM2G368411
GRMZM2G030167	31	7.42	19	4.55	54	12.93	seq=gene; coord=8:146872954..146882246:1;IPR002842:ATPase, V1/A1 complex, subunit E;	-	-	-	gi|226496896|ref|NP_001141326.1|/2.64796e-115/hypothetical protein LOC100273417 [Zea mays]	GRMZM2G030167
GRMZM2G302601	37	8.86	7	1.68	21	5.03	seq=gene; coord=7:148776850..148779143:-1	-	-	-	gi|226503105|ref|NP_001144496.1|/7.47212e-15/hypothetical protein LOC100277476 [Zea mays]	GRMZM2G302601
GRMZM2G142207	8	1.92	6	1.44	4	0.96	seq=gene; coord=3:208796379..208799112:1;IPR008271:Serine/threonine protein kinase, active site;IPR001480:Curculin-like (mannose-binding) lectin;IPR003609:Apple-like;IPR001245:Tyrosine protein kinase;IPR002290:Serine/threonine protein kinase;IPR011009:Protein kinase-like;IPR016085:Protease inhibitor, beta-barrel;IPR017442:Serine/threonine protein kinase-related;	-	GO:0005529//sugar binding;GO:0004713//protein tyrosine kinase activity;GO:0005524//ATP binding;GO:0004674//protein serine/threonine kinase activity	GO:0006468//protein amino acid phosphorylation	gi|242058287|ref|XP_002458289.1|/0/hypothetical protein SORBIDRAFT_03g030720 [Sorghum bicolor]	GRMZM2G142207
GRMZM2G143450	125	29.93	300	71.82	144	34.48	seq=gene; coord=9:142256848..142265390:-1;IPR014758:Methionyl-tRNA synthetase, class Ia, N-terminal;IPR002304:Methionyl-tRNA synthetase, class Ia;IPR001412:Aminoacyl-tRNA synthetase, class I, conserved site;IPR016027:Nucleic acid-binding, OB-fold-like;IPR009080:Aminoacyl-tRNA synthetase, class 1a, anticodon-binding;IPR015413:Aminoacyl-tRNA synthetase, class I (M);IPR002547:tRNA-binding region;IPR…	-	-	GO:0006412//translation;GO:0006412//translation	gi|242036495|ref|XP_002465642.1|/0/hypothetical protein SORBIDRAFT_01g042830 [Sorghum bicolor]	GRMZM2G143450
GRMZM2G469873	46	11.01	43	10.29	17	4.07	seq=gene; coord=4:111880862..111883342:1	-	-	-	gi|293334305|ref|NP_001168394.1|/0/hypothetical protein LOC100382163 [Zea mays]	GRMZM2G469873
GRMZM2G131026	126	30.17	179	42.86	191	45.73	seq=gene; coord=7:167734135..167738192:1	GO:0005739//mitochondrion;GO:0005739//mitochondrion;GO:0005739//mitochondrion	-	-	gi|242046962|ref|XP_002461227.1|/0/hypothetical protein SORBIDRAFT_02g043200 [Sorghum bicolor]	GRMZM2G131026
GRMZM2G131937	0	0	1	0.24	0	0	seq=gene; coord=1:212306588..212307915:-1;IPR009057:Homeodomain-like;IPR001005:SANT, DNA-binding;IPR014778:Myb, DNA-binding;	-	-	-	gi|242079269|ref|XP_002444403.1|/6.49312e-122/hypothetical protein SORBIDRAFT_07g021420 [Sorghum bicolor]	GRMZM2G131937
GRMZM2G102657	5	1.2	0	0	4	0.96	seq=gene; coord=9:128213891..128216349:-1;IPR011059:Metal-dependent hydrolase, composite;IPR006740:Protein of unknown function DUF604;	-	-	-	gi|238010386|gb|ACR36228.1|/0/unknown [Zea mays]	GRMZM2G102657
GRMZM2G072041	85	20.35	104	24.9	101	24.18	seq=gene; coord=1:30936074..30939728:1	-	-	-	gi|212274913|ref|NP_001130614.1|/3.04322e-119/hypothetical protein LOC100191713 [Zea mays]	GRMZM2G072041
GRMZM2G306935	19	4.55	41	9.82	33	7.9	seq=gene; coord=7:93355823..93362430:1	-	-	-	gi|242044496|ref|XP_002460119.1|/0/hypothetical protein SORBIDRAFT_02g023040 [Sorghum bicolor]	GRMZM2G306935
GRMZM2G174343	88	21.07	35	8.38	93	22.27	seq=gene; coord=8:13493964..13497005:1;IPR000326:Phosphatidic acid phosphatase type 2/haloperoxidase;IPR000326:Phosphatidic acid phosphatase type 2/haloperoxidase;IPR000326:Phosphatidic acid phosphatase type 2/haloperoxidase;IPR000326:Phosphatidic acid phosphatase type 2/haloperoxidase;IPR000326:Phosphatidic acid phosphatase type 2/haloperoxidase;IPR000326:Phosphatidic acid phosphatase type 2/hal…	-	-	-	gi|194694718|gb|ACF81443.1|/4.75428e-159/unknown [Zea mays]	GRMZM2G174343
GRMZM2G064328	73	17.48	70	16.76	87	20.83	seq=gene; coord=4:239460958..239465397:-1;IPR001005:SANT, DNA-binding;IPR009057:Homeodomain-like;IPR007526:SWIRM;IPR014778:Myb, DNA-binding;	-	GO:0042802//identical protein binding	-	gi|226505302|ref|NP_001141323.1|/0/hypothetical protein LOC100273414 [Zea mays]	GRMZM2G064328
GRMZM2G156069	12	2.87	15	3.59	12	2.87	seq=gene; coord=3:216609746..216617812:1;IPR003960:ATPase, AAA-type, conserved site;IPR003593:ATPase, AAA+ type, core;IPR005936:Peptidase M41, FtsH;IPR011546:Peptidase M41, FtsH extracellular;IPR003959:ATPase, AAA-type, core;IPR011704:ATPase associated with various cellular activities, AAA-5;IPR000642:Peptidase M41;	-	-	-	gi|242058043|ref|XP_002458167.1|/0/hypothetical protein SORBIDRAFT_03g028120 [Sorghum bicolor]	GRMZM2G156069
GRMZM2G445854	0	0	1	0.24	1	0.24	seq=gene; coord=4:5948348..5952958:1;IPR008949:Terpenoid synthase;IPR008930:Terpenoid cylases/protein prenyltransferase alpha-alpha toroid;IPR001906:Terpene synthase-like;IPR005630:Terpene synthase, metal-binding domain;	GO:0009536//plastid	GO:0051498;GO:0009905//ent-copalyl diphosphate synthase activity	GO:0051504;GO:0009685	gi|75103309|sp|Q5MQ85.1|CPS2_ORYSI/2.13182e-117/RecName: Full=Ent-copalyl diphosphate synthase 2; Short=Ent-CDP synthase 2; Short=OsCPS2ent; Short=OsCPS2; AltName: Full=Ent-kaurene synthase A; AltName: Full=OsCyc2	GRMZM2G445854
GRMZM2G397836	27	6.46	97	23.22	125	29.93	seq=gene; coord=1:262343330..262348798:-1;IPR001807:Chloride channel, voltage gated;IPR000644:Cystathionine beta-synthase, core;IPR014743:Chloride channel, core;IPR001807:Chloride channel, voltage gated;IPR000644:Cystathionine beta-synthase, core;IPR014743:Chloride channel, core;IPR001807:Chloride channel, voltage gated;IPR000644:Cystathionine beta-synthase, core;IPR014743:Chloride channel, core;	-	-	-	gi|1742959|emb|CAA96065.1|/2.76469e-176/CLC-d chloride channel protein [Arabidopsis thaliana]	GRMZM2G397836
GRMZM2G166671	101	24.18	102	24.42	176	42.14	seq=gene; coord=3:227992533..228001752:1;IPR006651:Kelch;IPR000408:Regulator of chromosome condensation, RCC1;IPR013989:Development and cell death domain;IPR006652:Kelch repeat type 1;IPR011043:Galactose oxidase/kelch, beta-propeller;IPR011498:Kelch repeat type 2;	-	-	-	gi|242082526|ref|XP_002441688.1|/0/hypothetical protein SORBIDRAFT_08g000780 [Sorghum bicolor]	GRMZM2G166671
GRMZM2G319573	33	7.9	36	8.62	205	49.08	seq=gene; coord=5:76572705..76585912:-1;IPR018329:DNA helicase, ATP-dependent, RecQ type, N-terminal region;IPR002464:DNA/RNA helicase, ATP-dependent, DEAH-box type, conserved site;IPR014001:DEAD-like helicase, N-terminal;IPR001650:DNA/RNA helicase, C-terminal;IPR011545:DNA/RNA helicase, DEAD/DEAH box type, N-terminal;IPR002464:DNA/RNA helicase, ATP-dependent, DEAH-box type, conserved site;IPR014…	-	GO:0016787//hydrolase activity;GO:0005488//binding;GO:0004386//helicase activity;GO:0008026//ATP-dependent helicase activity;GO:0005524//ATP binding	GO:0044237//cellular metabolic process;GO:0006310//DNA recombination	gi|242063976|ref|XP_002453277.1|/0/hypothetical protein SORBIDRAFT_04g003070 [Sorghum bicolor]	GRMZM2G319573
GRMZM2G174792	3	0.72	0	0	8	1.92	seq=gene; coord=7:126353230..126362335:-1;IPR001748:G10 protein;	GO:0005634//nucleus	-	-	gi|293333368|ref|NP_001169732.1|/3.94353e-36/hypothetical protein LOC100383613 [Zea mays]	GRMZM2G174792
GRMZM2G019356	360	86.19	255	61.05	141	33.76	seq=gene; coord=9:23098313..23100071:-1;IPR006766:Phosphate-induced protein 1 conserved region;	GO:0016023//cytoplasmic membrane-bounded vesicle	-	-	gi|242091864|ref|XP_002436422.1|/1.29183e-145/hypothetical protein SORBIDRAFT_10g002190 [Sorghum bicolor]	GRMZM2G019356
GRMZM2G315264	30	7.18	53	12.69	30	7.18	seq=gene; coord=4:16331959..16339834:1;IPR003960:ATPase, AAA-type, conserved site;IPR003593:ATPase, AAA+ type, core;IPR003959:ATPase, AAA-type, core;IPR011704:ATPase associated with various cellular activities, AAA-5;	-	-	-	gi|242070735|ref|XP_002450644.1|/0/hypothetical protein SORBIDRAFT_05g008540 [Sorghum bicolor]	GRMZM2G315264
GRMZM2G172330	439	105.11	468	112.05	577	138.15	seq=gene; coord=2:216777020..216781032:-1;IPR001245:Tyrosine protein kinase;IPR002290:Serine/threonine protein kinase;IPR011009:Protein kinase-like;IPR013210:Leucine-rich repeat, N-terminal;IPR001611:Leucine-rich repeat;IPR017442:Serine/threonine protein kinase-related;	GO:0016023//cytoplasmic membrane-bounded vesicle	-	-	gi|226501936|ref|NP_001151988.1|/0/brassinosteroid LRR receptor kinase [Zea mays]	GRMZM2G172330
GRMZM2G020285	18	4.31	16	3.83	28	6.7	seq=gene; coord=5:203666037..203669679:-1;IPR004348:Protein of unknown function DUF246, plant;	-	-	-	gi|242066126|ref|XP_002454352.1|/0/hypothetical protein SORBIDRAFT_04g029280 [Sorghum bicolor]	GRMZM2G020285
GRMZM2G009653	21	5.03	15	3.59	26	6.22	seq=gene; coord=2:3684257..3686527:-1	-	-	-	gi|238008010|gb|ACR35040.1|/3.33259e-14/unknown [Zea mays]	GRMZM2G009653
GRMZM2G178435	0	0	0	0	1	0.24	seq=gene; coord=4:149936451..149941866:1;IPR000330:SNF2-related;IPR001650:DNA/RNA helicase, C-terminal;IPR014001:DEAD-like helicase, N-terminal;	-	-	-	gi|242066540|ref|XP_002454559.1|/0/hypothetical protein SORBIDRAFT_04g033300 [Sorghum bicolor]	GRMZM2G178435
GRMZM2G053742	90	21.55	20	4.79	15	3.59	seq=gene; coord=1:90747948..90752810:1;IPR002052:N-6 adenine-specific DNA methylase, conserved site;IPR000007:Tubby, C-terminal;	-	-	-	gi|242040269|ref|XP_002467529.1|/0/hypothetical protein SORBIDRAFT_01g029670 [Sorghum bicolor]	GRMZM2G053742
GRMZM2G447691	303	72.55	415	99.36	253	60.57	seq=gene; coord=2:38622816..38625784:-1;IPR012946:X8;	GO:0016023//cytoplasmic membrane-bounded vesicle;GO:0016023//cytoplasmic membrane-bounded vesicle;GO:0016023//cytoplasmic membrane-bounded vesicle;GO:0016023//cytoplasmic membrane-bounded vesicle;GO:0016023//cytoplasmic membrane-bounded vesicle	-	-	gi|195609468|gb|ACG26564.1|/1.54917e-67/glucan endo-1,3-beta-glucosidase 4 precursor [Zea mays]	GRMZM2G447691
GRMZM2G049906	74	17.72	56	13.41	51	12.21	seq=gene; coord=1:288161269..288162870:1;IPR001245:Tyrosine protein kinase;IPR017441:Protein kinase, ATP binding site;IPR008266:Tyrosine protein kinase, active site;IPR002290:Serine/threonine protein kinase;IPR011009:Protein kinase-like;IPR017442:Serine/threonine protein kinase-related;	-	GO:0016301//kinase activity	-	gi|242037747|ref|XP_002466268.1|/2.37797e-167/hypothetical protein SORBIDRAFT_01g004780 [Sorghum bicolor]	GRMZM2G049906
GRMZM2G044343	2	0.48	142	34	4	0.96	seq=gene; coord=8:140537768..140542766:1;IPR012935:Zinc finger, C3HC-like;	-	-	-	gi|226492785|ref|NP_001141693.1|/0/hypothetical protein LOC100273822 [Zea mays]	GRMZM2G044343
GRMZM2G039592	124	29.69	60	14.36	36	8.62	seq=gene; coord=1:287751626..287753247:1;IPR008496:Protein of unknown function DUF778;	GO:0016020//membrane	-	-	gi|226497096|ref|NP_001144071.1|/2.94131e-106/hypothetical protein LOC100276900 [Zea mays]	GRMZM2G039592
GRMZM2G084779	0	0	3	0.72	0	0	seq=gene; coord=3:154564041..154569328:-1;IPR018519:Potassium uptake protein, kup;IPR003855:K+ potassium transporter;IPR003855:K+ potassium transporter;	GO:0016020//membrane;GO:0016020//membrane	-	-	gi|242055497|ref|XP_002456894.1|/0/hypothetical protein SORBIDRAFT_03g044790 [Sorghum bicolor]	GRMZM2G084779
GRMZM2G075884	23	5.51	8	1.92	5	1.2	seq=gene; coord=3:228305922..228308314:-1;IPR001245:Tyrosine protein kinase;IPR011009:Protein kinase-like;IPR008985:Concanavalin A-like lectin/glucanase;IPR001220:Legume lectin, beta domain;IPR017442:Serine/threonine protein kinase-related;IPR017441:Protein kinase, ATP binding site;IPR008271:Serine/threonine protein kinase, active site;IPR000985:Legume lectin, alpha;IPR002290:Serine/threonine pro…	GO:0043231//intracellular membrane-bounded organelle;GO:0044444//cytoplasmic part	-	-	gi|226504338|ref|NP_001148178.1|/0/protein kinase [Zea mays]	GRMZM2G075884
GRMZM2G149534	20	4.79	94	22.51	1	0.24	seq=gene; coord=10:25777101..25780345:1	-	-	-	gi|226499420|ref|NP_001143362.1|/8.55985e-91/hypothetical protein LOC100275988 [Zea mays]	GRMZM2G149534
GRMZM2G024131	20	4.79	25	5.99	34	8.14	seq=gene; coord=1:262028590..262031199:1;IPR002213:UDP-glucuronosyl/UDP-glucosyltransferase;IPR002213:UDP-glucuronosyl/UDP-glucosyltransferase;	GO:0009536//plastid;GO:0009536//plastid	GO:0047215//indole-3-acetate beta-glucosyltransferase activity;GO:0047215//indole-3-acetate beta-glucosyltransferase activity	GO:0008152//metabolic process;GO:0008152//metabolic process	gi|162460991|ref|NP_001105326.1|/0/IAA-glu synthetase [Zea mays]	GRMZM2G024131
GRMZM2G012464	24	5.75	264	63.21	86	20.59	seq=gene; coord=5:134053405..134054998:1	-	-	-	gi|242050106|ref|XP_002462797.1|/5.37472e-19/hypothetical protein SORBIDRAFT_02g032160 [Sorghum bicolor]	GRMZM2G012464
GRMZM2G176662	61	14.61	110	26.34	195	46.69	seq=gene; coord=1:288459632..288466033:-1;IPR002136:Ribosomal protein L4/L1e;	-	-	-	gi|226491762|ref|NP_001147335.1|/3.3063e-157/LOC100280943 [Zea mays]	GRMZM2G176662
GRMZM2G073077	49	11.73	163	39.02	239	57.22	seq=gene; coord=10:64870489..64873622:1;IPR005062:SAC3/GANP/Nin1/mts3/eIF-3 p25;IPR005062:SAC3/GANP/Nin1/mts3/eIF-3 p25;	-	-	-	gi|226497002|ref|NP_001148851.1|/6.22707e-140/26S proteasome non-ATPase regulatory subunit 8 [Zea mays]	GRMZM2G073077
GRMZM2G390009	1	0.24	0	0	0	0	seq=gene; coord=6:6704643..6705534:1;IPR002867:Zinc finger, C6HC-type;IPR017907:Zinc finger, RING-type, conserved site;	-	-	-	gi|224035271|gb|ACN36711.1|/2.93964e-56/unknown [Zea mays]	GRMZM2G390009
GRMZM2G123394	81	19.39	0	0	33	7.9	seq=gene; coord=8:165875097..165876997:-1;IPR009869:Hs1pro-1, N-terminal;IPR009743:Hs1pro-1, C-terminal;IPR018054:Chromogranin, conserved site;	-	-	-	gi|83271054|gb|ABC00199.1|/0/HS1-like protein [Saccharum hybrid cultivar R570]	GRMZM2G123394
GRMZM2G003909	1	0.24	0	0	0	0	seq=gene; coord=1:118266791..118268186:1;IPR010616:Protein of unknown function DUF1210;	GO:0016023//cytoplasmic membrane-bounded vesicle	-	-	gi|238014166|gb|ACR38118.1|/3.92291e-21/unknown [Zea mays]	GRMZM2G003909
GRMZM2G109326	0	0	1	0.24	0	0	seq=gene; coord=9:118981953..118984264:-1;IPR017391:COBRA-like;IPR008965:Carbohydrate-binding;IPR006918:Glycosyl-phosphatidyl inositol-anchored, plant;IPR017391:COBRA-like;IPR008965:Carbohydrate-binding;IPR006918:Glycosyl-phosphatidyl inositol-anchored, plant;	GO:0016023//cytoplasmic membrane-bounded vesicle;GO:0016023//cytoplasmic membrane-bounded vesicle	-	-	gi|162459967|ref|NP_001105928.1|/0/brittle stalk2 [Zea mays]	GRMZM2G109326
GRMZM2G052277	0	0	1	0.24	0	0	seq=gene; coord=2:133657890..133661728:-1;IPR000644:Cystathionine beta-synthase, core;	-	-	-	gi|242084930|ref|XP_002442890.1|/1.02476e-156/hypothetical protein SORBIDRAFT_08g004470 [Sorghum bicolor]	GRMZM2G052277
GRMZM2G048928	33	7.9	37	8.86	70	16.76	seq=gene; coord=2:163492167..163498588:1;IPR000533:Tropomyosin;IPR000533:Tropomyosin;IPR000533:Tropomyosin;	-	-	-	gi|219884639|gb|ACL52694.1|/0/unknown [Zea mays]	GRMZM2G048928
GRMZM2G067080	2	0.48	114	27.29	99	23.7	seq=gene; coord=8:82855686..82860188:-1;IPR001733:Peptidase S26B, eukaryotic signal peptidase;IPR015927:Peptidase S24, S26A, S26B and S26C;IPR011056:Peptidase S24, S26A and S26B, C-terminal;IPR001733:Peptidase S26B, eukaryotic signal peptidase;IPR015927:Peptidase S24, S26A, S26B and S26C;IPR011056:Peptidase S24, S26A and S26B, C-terminal;	-	-	-	gi|212275790|ref|NP_001130251.1|/8.76154e-98/hypothetical protein LOC100191345 [Zea mays]	GRMZM2G067080
GRMZM2G046267	0	0	5	1.2	0	0	seq=gene; coord=1:289090374..289091635:1	-	-	-	gi|242037717|ref|XP_002466253.1|/4.69727e-32/hypothetical protein SORBIDRAFT_01g004410 [Sorghum bicolor]	GRMZM2G046267
GRMZM2G174975	14	3.35	31	7.42	37	8.86	seq=gene; coord=3:60325055..60328558:1;IPR013830:Esterase, SGNH hydrolase-type;IPR001087:Lipase, GDSL;IPR013830:Esterase, SGNH hydrolase-type;IPR001087:Lipase, GDSL;	GO:0016023//cytoplasmic membrane-bounded vesicle;GO:0005739//mitochondrion;GO:0016023//cytoplasmic membrane-bounded vesicle;GO:0005739//mitochondrion	-	-	gi|219363735|ref|NP_001136917.1|/0/hypothetical protein LOC100217075 [Zea mays]	GRMZM2G174975
GRMZM2G026889	1	0.24	27	6.46	10	2.39	seq=gene; coord=9:113384890..113388875:-1;IPR008075:Lipocalin-1 receptor;IPR002495:Glycosyl transferase, family 8;	GO:0016020//membrane	-	-	gi|224029615|gb|ACN33883.1|/0/unknown [Zea mays]	GRMZM2G026889
GRMZM2G372077	239	57.22	256	61.29	150	35.91	seq=gene; coord=3:35597519..35600950:-1	GO:0005739//mitochondrion	-	-	gi|293336508|ref|NP_001167699.1|/2.79326e-28/hypothetical protein LOC100381381 [Zea mays]	GRMZM2G372077
GRMZM2G100475	21	5.03	4	0.96	10	2.39	seq=gene; coord=2:172205165..172208289:1;IPR007658:Protein of unknown function DUF594;	-	-	-	gi|218186091|gb|EEC68518.1|/1.42888e-164/hypothetical protein OsI_36799 [Oryza sativa Indica Group]	GRMZM2G100475
GRMZM2G098129	34	8.14	56	13.41	144	34.48	seq=gene; coord=8:67686406..67693582:-1;IPR000533:Tropomyosin;IPR015894:Guanylate-binding protein, N-terminal;IPR003191:Guanylate-binding protein, C-terminal;	-	-	-	gi|242091367|ref|XP_002441516.1|/0/hypothetical protein SORBIDRAFT_09g028440 [Sorghum bicolor]	GRMZM2G098129
GRMZM2G102845	16	3.83	122	29.21	199	47.64	seq=gene; coord=5:77679220..77687270:-1;IPR003340:Transcriptional factor B3;IPR010525:Auxin response factor;IPR002016:Haem peroxidase, plant/fungal/bacterial;	-	-	-	gi|242063990|ref|XP_002453284.1|/0/hypothetical protein SORBIDRAFT_04g003240 [Sorghum bicolor]	GRMZM2G102845
GRMZM2G341698	0	0	0	0	2	0.48	seq=gene; coord=9:104649241..104650521:1;IPR003072:Orphan nuclear receptor, NOR1 type;IPR000782:FAS1 domain;	-	-	-	gi|226492018|ref|NP_001149463.1|/1.5735e-115/fasciclin-like arabinogalactan protein 8 [Zea mays]	GRMZM2G341698
GRMZM2G409934	23	5.51	36	8.62	36	8.62	seq=gene; coord=5:94248285..94256132:1;IPR001594:Zinc finger, DHHC-type;	GO:0016020//membrane	-	-	gi|242064258|ref|XP_002453418.1|/9.87515e-141/hypothetical protein SORBIDRAFT_04g005696 [Sorghum bicolor]	GRMZM2G409934
GRMZM2G162333	209	50.04	4	0.96	5	1.2	seq=gene; coord=2:19184256..19186725:1;IPR011050:Pectin lyase fold/virulence factor;IPR000070:Pectinesterase, catalytic;IPR018040:Pectinesterase, active site;IPR000070:Pectinesterase, catalytic;IPR011050:Pectin lyase fold/virulence factor;	GO:0016023//cytoplasmic membrane-bounded vesicle	-	-	gi|219886901|gb|ACL53825.1|/0/unknown [Zea mays]	GRMZM2G162333
GRMZM2G145909	16	3.83	31	7.42	30	7.18	seq=gene; coord=10:59720347..59722355:-1;IPR011598:Helix-loop-helix DNA-binding;IPR011598:Helix-loop-helix DNA-binding;	-	-	-	gi|226499908|ref|NP_001145144.1|/1.59822e-66/hypothetical protein LOC100278375 [Zea mays]	GRMZM2G145909
GRMZM2G082906	69	16.52	0	0	113	27.05	seq=gene; coord=5:31821290..31822896:1	-	-	-	gi|238013854|gb|ACR37962.1|/2.01536e-85/unknown [Zea mays]	GRMZM2G082906
GRMZM2G142544	25	5.99	6	1.44	5	1.2	seq=gene; coord=2:162043616..162048529:-1;IPR001245:Tyrosine protein kinase;IPR002290:Serine/threonine protein kinase;IPR008271:Serine/threonine protein kinase, active site;IPR011009:Protein kinase-like;IPR017442:Serine/threonine protein kinase-related;IPR011009:Protein kinase-like;IPR017442:Serine/threonine protein kinase-related;IPR001245:Tyrosine protein kinase;IPR002290:Serine/threonine prote…	-	-	-	gi|242043966|ref|XP_002459854.1|/0/hypothetical protein SORBIDRAFT_02g012400 [Sorghum bicolor]	GRMZM2G142544
GRMZM2G077930	1	0.24	2	0.48	1	0.24	seq=gene; coord=5:16737175..16739895:-1;IPR004294:Carotenoid oxygenase;	GO:0009507//chloroplast	GO:0045549//9-cis-epoxycarotenoid dioxygenase activity	GO:0006950//response to stress;GO:0055114//oxidation reduction;GO:0009688//abscisic acid biosynthetic process	gi|226529341|ref|NP_001105902.2|/0/viviparous14 precursor [Zea mays]	GRMZM2G077930
GRMZM2G045236	63	15.08	167	39.98	143	34.24	seq=gene; coord=6:147059915..147064450:-1;IPR001630:cAMP response element binding (CREB) protein;IPR004827:Basic-leucine zipper (bZIP) transcription factor;IPR011616:bZIP transcription factor, bZIP-1;IPR011700:Basic leucine zipper;IPR001630:cAMP response element binding (CREB) protein;IPR011616:bZIP transcription factor, bZIP-1;IPR011700:Basic leucine zipper;IPR004827:Basic-leucine zipper (bZIP) …	-	-	-	gi|226492761|ref|NP_001148077.1|/0/DNA binding protein [Zea mays]	GRMZM2G045236
GRMZM2G061704	6	1.44	4	0.96	5	1.2	seq=gene; coord=1:155459084..155461776:-1;IPR017907:Zinc finger, RING-type, conserved site;IPR001841:Zinc finger, RING-type;	-	GO:0005488//binding	-	gi|242085946|ref|XP_002443398.1|/0/hypothetical protein SORBIDRAFT_08g018890 [Sorghum bicolor]	GRMZM2G061704
GRMZM2G166109	36	8.62	168	40.22	129	30.89	seq=gene; coord=5:16313312..16320128:1	-	-	-	gi|219888753|gb|ACL54751.1|/3.75427e-97/unknown [Zea mays]	GRMZM2G166109
GRMZM2G004191	1	0.24	1	0.24	3	0.72	seq=gene; coord=1:201000412..201002707:-1;IPR005386:EDG-8 sphingosine 1-phosphate receptor;IPR005386:EDG-8 sphingosine 1-phosphate receptor;	-	-	-	gi|226530926|ref|NP_001142615.1|/2.02918e-145/hypothetical protein LOC100274884 [Zea mays]	GRMZM2G004191
GRMZM2G061472	1	0.24	0	0	3	0.72	seq=gene; coord=9:11859428..11861492:-1;IPR013536:WLM;IPR013536:WLM;	-	-	-	gi|168251062|gb|ACA21845.1|/7.95869e-150/hypothetical protein 4 [Zea mays]	GRMZM2G061472
GRMZM2G037823	106	25.38	119	28.49	82	19.63	seq=gene; coord=5:170272331..170274823:1	-	-	-	gi|293334305|ref|NP_001168394.1|/6.68544e-162/hypothetical protein LOC100382163 [Zea mays]	GRMZM2G037823
GRMZM2G430387	1	0.24	0	0	0	0	seq=gene; coord=3:33640498..33641834:-1;IPR000104:Antifreeze protein, type I;	-	-	-	gi|226505520|ref|NP_001142612.1|/5.79385e-68/hypothetical protein LOC100274880 [Zea mays]	GRMZM2G430387
GRMZM2G311850	0	0	1	0.24	0	0	seq=gene; coord=2:42802582..42808665:1	-	-	-	gi|226532562|ref|NP_001142472.1|/1.54541e-80/hypothetical protein LOC100274682 [Zea mays]	GRMZM2G311850
GRMZM2G401026	6	1.44	36	8.62	8	1.92	seq=gene; coord=5:8302149..8303472:1	GO:0009536//plastid	-	-	gi|226502172|ref|NP_001142956.1|/4.213e-87/hypothetical protein LOC100275407 [Zea mays]	GRMZM2G401026
GRMZM2G096470	94	22.51	122	29.21	100	23.94	seq=gene; coord=3:180329395..180341707:1;IPR000195:RabGAP/TBC;IPR000195:RabGAP/TBC;	-	-	-	gi|242059155|ref|XP_002458723.1|/0/hypothetical protein SORBIDRAFT_03g039030 [Sorghum bicolor]	GRMZM2G096470
GRMZM2G702302	25	5.99	39	9.34	179	42.86	seq=gene; coord=3:222984321..222985272:-1	GO:0005739//mitochondrion	-	-	gi|226496623|ref|NP_001141416.1|/2.23168e-37/hypothetical protein LOC100273526 [Zea mays]	GRMZM2G702302
GRMZM2G403562	26	6.23	36	8.62	44	10.53	seq=gene; coord=2:141854694..141863040:-1;IPR001965:Zinc finger, PHD-type;IPR018500:DDT subgroup;IPR001841:Zinc finger, RING-type;IPR002219:Protein kinase C, phorbol ester/diacylglycerol binding;IPR011011:Zinc finger, FYVE/PHD-type;IPR004022:DDT family;	-	-	-	gi|242069991|ref|XP_002450272.1|/0/hypothetical protein SORBIDRAFT_05g002930 [Sorghum bicolor]	GRMZM2G403562
GRMZM2G113002	290	69.43	243	58.18	202	48.36	seq=gene; coord=1:40720788..40724020:-1;IPR002110:Ankyrin;IPR001841:Zinc finger, RING-type;IPR001841:Zinc finger, RING-type;	-	GO:0004872//receptor activity;GO:0016301//kinase activity;GO:0005515//protein binding;GO:0004842//ubiquitin-protein ligase activity;GO:0008270//zinc ion binding;GO:0004872//receptor activity;GO:0016301//kinase activity;GO:0005515//protein binding;GO:0004842//ubiquitin-protein ligase activity;GO:0008270//zinc ion binding	GO:0042742//defense response to bacterium;GO:0051865//protein autoubiquitination;GO:0042742//defense response to bacterium;GO:0051865//protein autoubiquitination	gi|223946621|gb|ACN27394.1|/0/unknown [Zea mays]	GRMZM2G113002
GRMZM2G037639	45	10.77	120	28.73	36	8.62	seq=gene; coord=1:183437789..183438759:1	-	-	-	-	GRMZM2G037639
GRMZM2G155849	196	46.93	210	50.28	109	26.1	seq=gene; coord=2:219542100..219555210:1;IPR001810:Cyclin-like F-box;IPR006553:Leucine-rich repeat, cysteine-containing subtype;IPR003590:Leucine-rich repeat, ribonuclease inhibitor subtype;IPR001810:Cyclin-like F-box;IPR006553:Leucine-rich repeat, cysteine-containing subtype;	-	GO:0005515//protein binding;GO:0005515//protein binding	-	gi|195658935|gb|ACG48935.1|/0/transport inhibitor response 1 protein [Zea mays]	GRMZM2G155849
GRMZM2G085827	30	7.18	11	2.63	40	9.58	seq=gene; coord=1:2712562..2721170:1;IPR004568:Phosphopantethiene-protein transferase;IPR008278:4'-phosphopantetheinyl transferase;IPR004568:Phosphopantethiene-protein transferase;IPR008278:4'-phosphopantetheinyl transferase;	GO:0005739//mitochondrion;GO:0005739//mitochondrion	-	-	gi|195639072|gb|ACG39004.1|/2.29516e-156/4-phosphopantetheinyl transferase sfp [Zea mays]	GRMZM2G085827
GRMZM2G367657	1	0.24	0	0	0	0	seq=gene; coord=4:223150497..223157976:-1	GO:0005739//mitochondrion	-	-	gi|242041741|ref|XP_002468265.1|/5.20355e-59/hypothetical protein SORBIDRAFT_01g042703 [Sorghum bicolor]	GRMZM2G367657
GRMZM2G050647	97	23.22	158	37.83	143	34.24	seq=gene; coord=10:115732457..115742717:1	-	-	-	gi|242073062|ref|XP_002446467.1|/0/hypothetical protein SORBIDRAFT_06g016440 [Sorghum bicolor]	GRMZM2G050647
GRMZM2G119999	0	0	1	0.24	1	0.24	seq=gene; coord=1:138879174..138881324:1;IPR000047:Helix-turn-helix motif, lambda-like repressor;IPR001356:Homeobox;IPR017970:Homeobox, conserved site;IPR009057:Homeodomain-like;IPR003106:Leucine zipper, homeobox-associated;IPR000047:Helix-turn-helix motif, lambda-like repressor;IPR017970:Homeobox, conserved site;IPR001356:Homeobox;IPR009057:Homeodomain-like;IPR003106:Leucine zipper, homeobox-ass…	GO:0005634//nucleus	GO:0003700//transcription factor activity	GO:0006355//regulation of transcription, DNA-dependent	gi|226502724|ref|NP_001141777.1|/4.13059e-117/hypothetical protein LOC100273913 [Zea mays]	GRMZM2G119999
GRMZM2G142068	25	5.99	28	6.7	23	5.51	seq=gene; coord=6:169180735..169185194:-1;IPR001245:Tyrosine protein kinase;IPR008266:Tyrosine protein kinase, active site;IPR002290:Serine/threonine protein kinase;IPR011009:Protein kinase-like;IPR017442:Serine/threonine protein kinase-related;	-	-	-	gi|242089077|ref|XP_002440371.1|/0/hypothetical protein SORBIDRAFT_09g030480 [Sorghum bicolor]	GRMZM2G142068
GRMZM2G043887	31	7.42	130	31.12	6	1.44	seq=gene; coord=10:130254234..130257362:1;IPR001597:Aromatic amino acid beta-eliminating lyase/threonine aldolase;IPR015424:Pyridoxal phosphate-dependent transferase, major region;IPR015424:Pyridoxal phosphate-dependent transferase, major region;IPR000277:Cys/Met metabolism, pyridoxal phosphate-dependent enzyme;IPR004839:Aminotransferase, class I and II;IPR001597:Aromatic amino acid beta-eliminat…	-	-	-	gi|226499866|ref|NP_001149239.1|/0/L-allo-threonine aldolase [Zea mays]	GRMZM2G043887
GRMZM2G068959	145	34.72	44	10.53	50	11.97	seq=gene; coord=UNKNOWN:2648061..2649657:-1	-	-	-	gi|195627194|gb|ACG35427.1|/6.28961e-58/hypothetical protein [Zea mays]	GRMZM2G068959
GRMZM2G027860	56	13.41	38	9.1	27	6.46	seq=gene; coord=9:47835306..47843563:1;IPR001757:ATPase, P-type, K/Mg/Cd/Cu/Zn/Na/Ca/Na/H-transporter;IPR001757:ATPase, P-type, K/Mg/Cd/Cu/Zn/Na/Ca/Na/H-transporter;IPR000695:ATPase, P-type, H+ transporting proton pump;IPR006539:ATPase, P-type, phospholipid-translocating, flippase;IPR018303:ATPase, P-type phosphorylation site;IPR008250:ATPase, P-type, ATPase-associated region;	-	-	-	gi|242095764|ref|XP_002438372.1|/4.00138e-137/hypothetical protein SORBIDRAFT_10g014640 [Sorghum bicolor]	GRMZM2G027860
GRMZM2G017815	6	1.44	17	4.07	9	2.15	seq=gene; coord=10:131989650..131994730:1;IPR001680:WD40 repeat;IPR011046:WD40 repeat-like;	-	-	-	gi|242073786|ref|XP_002446829.1|/0/hypothetical protein SORBIDRAFT_06g023320 [Sorghum bicolor]	GRMZM2G017815
GRMZM2G106558	0	0	1	0.24	1	0.24	seq=gene; coord=1:214744656..214746274:-1;IPR001005:SANT, DNA-binding;IPR009057:Homeodomain-like;IPR014778:Myb, DNA-binding;IPR001005:SANT, DNA-binding;IPR009057:Homeodomain-like;IPR014778:Myb, DNA-binding;	GO:0005840//ribosome;GO:0005634//nucleus	GO:0003677//DNA binding;GO:0003735//structural constituent of ribosome	GO:0006412//translation;GO:0006355//regulation of transcription, DNA-dependent	gi|194694300|gb|ACF81234.1|/4.93555e-142/unknown [Zea mays]	GRMZM2G106558
GRMZM2G165836	0	0	1	0.24	4	0.96	seq=gene; coord=2:39040336..39041301:1;IPR005427:Salmonella/Shigella invasin protein C;	-	-	-	gi|242076176|ref|XP_002448024.1|/6.95348e-31/hypothetical protein SORBIDRAFT_06g019810 [Sorghum bicolor]	GRMZM2G165836
GRMZM2G331720	29	6.94	10	2.39	7	1.68	seq=gene; coord=3:202079538..202081182:1;IPR002921:Lipase, class 3;	-	-	-	gi|242058485|ref|XP_002458388.1|/0/hypothetical protein SORBIDRAFT_03g032660 [Sorghum bicolor]	GRMZM2G331720
GRMZM2G173280	2	0.48	5	1.2	3	0.72	seq=gene; coord=3:119967485..119969513:1;IPR005516:Remorin, C-terminal region;	-	-	-	gi|238008014|gb|ACR35042.1|/0/unknown [Zea mays]	GRMZM2G173280
GRMZM2G398559	0	0	0	0	1	0.24	seq=gene; coord=5:76038749..76041874:1;IPR001245:Tyrosine protein kinase;IPR002290:Serine/threonine protein kinase;IPR011009:Protein kinase-like;	GO:0044444//cytoplasmic part;GO:0043231//intracellular membrane-bounded organelle	-	-	gi|242060428|ref|XP_002451503.1|/0/hypothetical protein SORBIDRAFT_04g002950 [Sorghum bicolor]	GRMZM2G398559
GRMZM2G126261	3	0.72	0	0	0	0	seq=gene; coord=7:167070464..167072295:1;IPR000823:Plant peroxidase;IPR002016:Haem peroxidase, plant/fungal/bacterial;IPR002207:Plant ascorbate peroxidase;IPR001419:HMW glutenin;IPR010255:Haem peroxidase;IPR000823:Plant peroxidase;IPR002016:Haem peroxidase, plant/fungal/bacterial;IPR002207:Plant ascorbate peroxidase;IPR010255:Haem peroxidase;IPR000823:Plant peroxidase;IPR002016:Haem peroxidase, p…	GO:0016023//cytoplasmic membrane-bounded vesicle;GO:0005576//extracellular region;GO:0016023//cytoplasmic membrane-bounded vesicle;GO:0016023//cytoplasmic membrane-bounded vesicle;GO:0005576//extracellular region	GO:0009055//electron carrier activity;GO:0020037//heme binding;GO:0005509//calcium ion binding;GO:0004601//peroxidase activity;GO:0046872//metal ion binding;GO:0043169//cation binding;GO:0016491//oxidoreductase activity;GO:0005506//iron ion binding;GO:0009055//electron carrier activity;GO:0020037//heme binding;GO:0005509//calcium ion binding;GO:0004601//peroxidase activity	GO:0042744//hydrogen peroxide catabolic process;GO:0055114//oxidation reduction;GO:0008152//metabolic process;GO:0006979//response to oxidative stress;GO:0042744//hydrogen peroxide catabolic process;GO:0055114//oxidation reduction	gi|194708466|gb|ACF88317.1|/7.07189e-155/unknown [Zea mays]	GRMZM2G126261
GRMZM2G109130	62	14.84	171	40.94	119	28.49	seq=gene; coord=1:263313247..263318056:1;IPR001246:Lipoxygenase, plant;IPR013819:Lipoxygenase, C-terminal;IPR008976:Lipase/lipooxygenase, PLAT/LH2;IPR001024:Lipoxygenase, LH2;IPR001246:Lipoxygenase, plant;IPR013819:Lipoxygenase, C-terminal;	GO:0005737//cytoplasm;GO:0005737//cytoplasm	GO:0009055//electron carrier activity;GO:0005506//iron ion binding;GO:0016165//lipoxygenase activity;GO:0009055//electron carrier activity;GO:0005506//iron ion binding;GO:0016165//lipoxygenase activity	GO:0031408//oxylipin biosynthetic process;GO:0009611//response to wounding;GO:0051707//response to other organism;GO:0022900//electron transport chain;GO:0031408//oxylipin biosynthetic process;GO:0009611//response to wounding;GO:0051707//response to other organism;GO:0022900//electron transport chain	gi|162459823|ref|NP_001105515.1|/0/lipoxygenase [Zea mays]	GRMZM2G109130
GRMZM2G178955	31	7.42	1	0.24	47	11.25	seq=gene; coord=4:172398890..172404070:-1;IPR013809:Epsin-like, N-terminal;IPR008942:ENTH/VHS;IPR011417:ANTH;IPR001026:Epsin, N-terminal;	-	-	-	gi|242063412|ref|XP_002452995.1|/0/hypothetical protein SORBIDRAFT_04g036280 [Sorghum bicolor]	GRMZM2G178955
GRMZM2G120110	3	0.72	6	1.44	1	0.24	seq=gene; coord=2:186785846..186787941:-1	-	GO:0005515//protein binding	-	gi|212721804|ref|NP_001132158.1|/0/hypothetical protein LOC100193579 [Zea mays]	GRMZM2G120110
AC217401.3_FG002	0	0	0	0	3	0.72	seq=gene; coord=1:263960570..263969067:-1;IPR018120:Glycoside hydrolase, family 1, active site	GO:0016023//cytoplasmic membrane-bounded vesicle;GO:0005739//mitochondrion	-	-	gi|226502646|ref|NP_001151026.1|/0/LOC100284659 [Zea mays]	AC217401.3_FG002
GRMZM2G448883	184	44.05	143	34.24	175	41.9	seq=gene; coord=4:179332062..179333461:1;IPR006766:Phosphate-induced protein 1 conserved region;	GO:0016023//cytoplasmic membrane-bounded vesicle	-	-	gi|194703044|gb|ACF85606.1|/1.75657e-147/unknown [Zea mays]	GRMZM2G448883
GRMZM2G136465	7	1.68	10	2.39	10	2.39	seq=gene; coord=5:201560085..201565280:-1;IPR002202:Hydroxymethylglutaryl-CoA reductase, class I/II, catalytic;IPR004554:Hydroxymethylglutaryl-CoA reductase, class I, catalytic;IPR009029:Hydroxymethylglutaryl-CoA reductase, class I/II, substrate-binding;	GO:0016021//integral to membrane	GO:0004420//hydroxymethylglutaryl-CoA reductase (NADPH) activity	GO:0006629//lipid metabolic process	gi|242062728|ref|XP_002452653.1|/0/hypothetical protein SORBIDRAFT_04g030030 [Sorghum bicolor]	GRMZM2G136465
GRMZM2G044503	36	8.62	127	30.41	7	1.68	seq=gene; coord=3:84984695..84987092:1	-	-	-	-	GRMZM2G044503
GRMZM2G133189	13	3.11	14	3.35	7	1.68	seq=gene; coord=3:184514133..184515666:1	-	-	-	gi|242059055|ref|XP_002458673.1|/1.04488e-47/hypothetical protein SORBIDRAFT_03g037880 [Sorghum bicolor]	GRMZM2G133189
GRMZM2G104456	52	12.45	176	42.14	204	48.84	seq=gene; coord=4:240278690..240281858:-1	-	-	-	gi|226529047|ref|NP_001149432.1|/8.80035e-22/nucleolin [Zea mays]	GRMZM2G104456
GRMZM2G038032	275	65.84	316	75.66	315	75.42	seq=gene; coord=6:162962939..162965326:-1;IPR001680:WD40 repeat;IPR011046:WD40 repeat-like;	-	-	-	gi|226498574|ref|NP_001146976.1|/0/LOC100280585 [Zea mays]	GRMZM2G038032
GRMZM2G471051	33	7.9	0	0	0	0	seq=gene; coord=8:161455819..161456622:-1;IPR016140:Bifunctional inhibitor/plant lipid transfer protein/seed storage;IPR003612:Plant lipid transfer protein/seed storage/trypsin-alpha amylase inhibitor;	-	-	-	gi|242055361|ref|XP_002456826.1|/2.08521e-36/hypothetical protein SORBIDRAFT_03g043610 [Sorghum bicolor]	GRMZM2G471051
GRMZM2G391746	0	0	3	0.72	0	0	seq=gene; coord=2:4028607..4029266:1	-	-	-	gi|195607632|gb|ACG25646.1|/7.37464e-17/hypothetical protein [Zea mays]	GRMZM2G391746
GRMZM2G472052	50	11.97	117	28.01	18	4.31	seq=gene; coord=7:21079617..21090068:-1;IPR004087:K Homology;IPR004087:K Homology;IPR004087:K Homology;	-	-	-	gi|226503273|ref|NP_001150031.1|/8.68446e-153/nucleic acid binding protein [Zea mays]	GRMZM2G472052
GRMZM2G080512	14	3.35	1	0.24	3	0.72	seq=gene; coord=7:4862558..4864678:-1;IPR011545:DNA/RNA helicase, DEAD/DEAH box type, N-terminal;IPR014001:DEAD-like helicase, N-terminal;	GO:0005634//nucleus;GO:0005739//mitochondrion	GO:0008026//ATP-dependent helicase activity;GO:0003723//RNA binding;GO:0005524//ATP binding;GO:0008270//zinc ion binding	-	gi|226510222|ref|NP_001147777.1|/1.28069e-137/nucleolar RNA helicase 2 [Zea mays]	GRMZM2G080512
GRMZM2G448834	188	45.01	107	25.62	90	21.55	seq=gene; coord=3:155808884..155812125:-1;IPR004263:Exostosin-like;IPR000104:Antifreeze protein, type I;IPR004263:Exostosin-like;IPR004263:Exostosin-like;IPR004263:Exostosin-like;	GO:0016023//cytoplasmic membrane-bounded vesicle;GO:0016023//cytoplasmic membrane-bounded vesicle;GO:0016023//cytoplasmic membrane-bounded vesicle;GO:0016023//cytoplasmic membrane-bounded vesicle	-	GO:0009987//cellular process;GO:0009987//cellular process;GO:0009987//cellular process;GO:0009987//cellular process	gi|195648072|gb|ACG43504.1|/0/secondary cell wall-related glycosyltransferase family 47 [Zea mays]	GRMZM2G448834
GRMZM2G082312	51	12.21	4	0.96	160	38.31	seq=gene; coord=1:289249500..289253554:1;IPR003690:Mitochodrial transcription termination factor-related;IPR004314:Protein of unknown function DUF239, plant;IPR004314:Protein of unknown function DUF239, plant;IPR004314:Protein of unknown function DUF239, plant;	GO:0016023//cytoplasmic membrane-bounded vesicle;GO:0016023//cytoplasmic membrane-bounded vesicle;GO:0016023//cytoplasmic membrane-bounded vesicle;GO:0016023//cytoplasmic membrane-bounded vesicle	-	-	gi|226530387|ref|NP_001140425.1|/0/hypothetical protein LOC100272482 [Zea mays]	GRMZM2G082312
GRMZM2G018223	0	0	18	4.31	8	1.92	seq=gene; coord=2:49156346..49161347:1;IPR018087:Glycoside hydrolase, family 5, conserved site;IPR006849:IKI3;IPR011046:WD40 repeat-like;	-	-	-	gi|242075872|ref|XP_002447872.1|/0/hypothetical protein SORBIDRAFT_06g017250 [Sorghum bicolor]	GRMZM2G018223
GRMZM2G176063	76	18.2	241	57.7	237	56.74	seq=gene; coord=3:122478661..122481046:-1;IPR000104:Antifreeze protein, type I;IPR005398:Tubby, N-terminal;IPR003851:Zinc finger, Dof-type;IPR000104:Antifreeze protein, type I;IPR005398:Tubby, N-terminal;IPR003851:Zinc finger, Dof-type;	-	-	-	gi|242083858|ref|XP_002442354.1|/4.66775e-72/hypothetical protein SORBIDRAFT_08g018760 [Sorghum bicolor]	GRMZM2G176063
GRMZM2G159369	8	1.92	5	1.2	5	1.2	seq=gene; coord=6:127073227..127077887:1;IPR006662:Thioredoxin-like subdomain;IPR005788:Disulphide isomerase;IPR012336:Thioredoxin-like fold;IPR011679:Endoplasmic reticulum, protein ERp29, C-terminal;IPR013766:Thioredoxin domain;IPR017937:Thioredoxin, conserved site;IPR011679:Endoplasmic reticulum, protein ERp29, C-terminal;IPR012336:Thioredoxin-like fold;	GO:0016023//cytoplasmic membrane-bounded vesicle;GO:0005783//endoplasmic reticulum;GO:0016023//cytoplasmic membrane-bounded vesicle;GO:0005783//endoplasmic reticulum	GO:0009055//electron carrier activity;GO:0016853//isomerase activity;GO:0009055//electron carrier activity;GO:0016853//isomerase activity	GO:0045454//cell redox homeostasis;GO:0022900//electron transport chain;GO:0045454//cell redox homeostasis;GO:0022900//electron transport chain	gi|162461925|ref|NP_001105759.1|/1.48278e-112/protein disulfide isomerase [Zea mays]	GRMZM2G159369
GRMZM2G022347	2	0.48	1	0.24	0	0	seq=gene; coord=2:62802611..62803536:1;IPR006040:Allergen Ole e 1, conserved site;IPR006041:Pollen Ole e 1 allergen and extensin;	GO:0016023//cytoplasmic membrane-bounded vesicle;GO:0005615//extracellular space	-	-	gi|194697222|gb|ACF82695.1|/4.27675e-87/unknown [Zea mays]	GRMZM2G022347
GRMZM2G127050	346	82.84	153	36.63	7	1.68	seq=gene; coord=9:147322929..147327685:1;IPR002290:Serine/threonine protein kinase;IPR001245:Tyrosine protein kinase;IPR011009:Protein kinase-like;IPR011009:Protein kinase-like;IPR001245:Tyrosine protein kinase;IPR002290:Serine/threonine protein kinase;	-	GO:0005515//protein binding;GO:0005515//protein binding	-	gi|238010110|gb|ACR36090.1|/0/unknown [Zea mays]	GRMZM2G127050
GRMZM2G099337	166	39.75	89	21.31	243	58.18	seq=gene; coord=9:109716160..109724181:-1;IPR001965:Zinc finger, PHD-type;IPR011011:Zinc finger, FYVE/PHD-type;	-	-	-	gi|242035003|ref|XP_002464896.1|/0/hypothetical protein SORBIDRAFT_01g028420 [Sorghum bicolor]	GRMZM2G099337
GRMZM2G478568	2	0.48	2	0.48	0	0	seq=gene; coord=1:258896612..258898296:-1;IPR001635:Flagellar hook-length control protein;IPR003058:Cloacin;IPR004298:Nicotianamine synthase;	-	GO:0030410//nicotianamine synthase activity	GO:0006826//iron ion transport	gi|20387260|dbj|BAB91326.1|/2.22491e-147/nicotianamine synthase 3 [Zea mays]	GRMZM2G478568
GRMZM2G078118	31	7.42	28	6.7	13	3.11	seq=gene; coord=5:214574623..214577883:1	GO:0005739//mitochondrion;GO:0005739//mitochondrion;GO:0005739//mitochondrion	-	-	gi|194697562|gb|ACF82865.1|/2.1864e-110/unknown [Zea mays]	GRMZM2G078118
GRMZM2G036765	165	39.51	897	214.76	331	79.25	seq=gene; coord=1:236378306..236383584:-1;IPR000641:CbxX/CfqX;IPR008092:Death associated protein 3;IPR003593:ATPase, AAA+ type, core;IPR003960:ATPase, AAA-type, conserved site;IPR005938:ATPase, AAA-type, CDC48;IPR009010:Aspartate decarboxylase-like fold;IPR003338:ATPase, AAA-type, VAT, N-terminal;IPR004201:Cell division protein 48, CDC48, domain 2;IPR003959:ATPase, AAA-type, core;IPR011704:ATPase…	-	GO:0042802//identical protein binding;GO:0042802//identical protein binding	-	gi|195655551|gb|ACG47243.1|/2.97722e-31/hypothetical protein [Zea mays]	GRMZM2G036765
GRMZM2G037627	7	1.68	4	0.96	14	3.35	seq=gene; coord=7:122993700..122995553:-1;IPR011016:Zinc finger, RING-CH-type;IPR001841:Zinc finger, RING-type;	-	-	-	gi|226506540|ref|NP_001147691.1|/1.20186e-141/RING-H2 finger protein ATL5F [Zea mays]	GRMZM2G037627
GRMZM2G087806	71	17	124	29.69	81	19.39	seq=gene; coord=9:91086247..91097193:-1;IPR002110:Ankyrin;IPR001594:Zinc finger, DHHC-type;	GO:0016020//membrane	-	-	gi|242093712|ref|XP_002437346.1|/0/hypothetical protein SORBIDRAFT_10g025310 [Sorghum bicolor]	GRMZM2G087806
GRMZM2G056513	36	8.62	100	23.94	4	0.96	seq=gene; coord=2:3941357..3942490:1	-	-	-	gi|293335161|ref|NP_001170256.1|/6.53299e-50/hypothetical protein LOC100384213 [Zea mays]	GRMZM2G056513
GRMZM2G310155	11	2.63	27	6.46	32	7.66	seq=gene; coord=9:147212032..147218910:1;IPR001487:Bromodomain;IPR018359:Bromodomain, conserved site;IPR001487:Bromodomain;	-	-	-	gi|194705184|gb|ACF86676.1|/6.92201e-58/unknown [Zea mays]	GRMZM2G310155
GRMZM2G093270	13	3.11	3	0.72	6	1.44	seq=gene; coord=9:108862150..108864466:1;IPR000315:Zinc finger, B-box;IPR006734:Protein of unknown function DUF597;	-	-	-	gi|226528870|ref|NP_001145502.1|/1.7311e-118/hypothetical protein LOC100278906 [Zea mays]	GRMZM2G093270
GRMZM2G028438	13	3.11	10	2.39	6	1.44	seq=gene; coord=4:155158091..155160361:-1;IPR000104:Antifreeze protein, type I;IPR005202:GRAS transcription factor;	-	-	-	gi|226493033|ref|NP_001147939.1|/0/chitin-inducible gibberellin-responsive protein 2 [Zea mays]	GRMZM2G028438
GRMZM2G478212	0	0	2	0.48	1	0.24	seq=gene; coord=1:104299359..104310590:-1;IPR007300:LrgB-like protein;	GO:0009536//plastid;GO:0016020//membrane	-	-	gi|226501414|ref|NP_001151575.1|/0/lrgB-like family protein [Zea mays]	GRMZM2G478212
AC177908.3_FG002	28	6.7	34	8.14	26	6.22	seq=gene; coord=1:71637858..71639508:-1;IPR002495:Glycosyl transferase, family 8	-	-	-	gi|226492229|ref|NP_001147871.1|/0/transferase, transferring glycosyl groups [Zea mays]	AC177908.3_FG002
GRMZM2G097802	43	10.3	30	7.18	162	38.79	seq=gene; coord=2:98224260..98229774:-1;IPR013057:Amino acid transporter, transmembrane;IPR001412:Aminoacyl-tRNA synthetase, class I, conserved site;IPR001412:Aminoacyl-tRNA synthetase, class I, conserved site;IPR013057:Amino acid transporter, transmembrane;IPR001412:Aminoacyl-tRNA synthetase, class I, conserved site;IPR013057:Amino acid transporter, transmembrane;IPR013057:Amino acid transporter…	-	-	-	gi|224030581|gb|ACN34366.1|/0/unknown [Zea mays]	GRMZM2G097802
GRMZM2G132958	1	0.24	5	1.2	0	0	seq=gene; coord=1:266277457..266279157:1;IPR000104:Antifreeze protein, type I;IPR005061:Protein of unknown function DUF292, eukaryotic;	GO:0005739//mitochondrion	-	-	gi|194705528|gb|ACF86848.1|/1.40122e-175/unknown [Zea mays]	GRMZM2G132958
GRMZM2G043489	189	45.25	37	8.86	46	11.01	seq=gene; coord=2:207630455..207636472:-1	-	-	-	gi|226504392|ref|NP_001146572.1|/0/hypothetical protein LOC100280168 [Zea mays]	GRMZM2G043489
GRMZM2G400655	2	0.48	1	0.24	0	0	seq=gene; coord=2:104740792..104746969:-1;IPR002241:Glycoside hydrolase, family 27;IPR007087:Zinc finger, C2H2-type;IPR017853:Glycoside hydrolase, catalytic core;IPR000111:Glycoside hydrolase, clan GH-D;	GO:0016023//cytoplasmic membrane-bounded vesicle	GO:0004557//alpha-galactosidase activity	GO:0005975//carbohydrate metabolic process	gi|212274867|ref|NP_001130661.1|/1.90975e-116/hypothetical protein LOC100191764 [Zea mays]	GRMZM2G400655
GRMZM2G006676	726	173.82	722	172.86	557	133.36	seq=gene; coord=1:19034997..19035856:-1;IPR003072:Orphan nuclear receptor, NOR1 type;IPR000104:Antifreeze protein, type I;IPR008097:Fractalkine/neurotactin;IPR003882:Pistil-specific extensin-like protein;	-	-	-	-	GRMZM2G006676
GRMZM2G355846	5	1.2	0	0	0	0	seq=gene; coord=1:9109054..9113489:-1;IPR002035:von Willebrand factor, type A;IPR001965:Zinc finger, PHD-type;IPR011016:Zinc finger, RING-CH-type;IPR001841:Zinc finger, RING-type;IPR001965:Zinc finger, PHD-type;IPR011016:Zinc finger, RING-CH-type;IPR001841:Zinc finger, RING-type;IPR002035:von Willebrand factor, type A;	-	-	-	gi|242042269|ref|XP_002468529.1|/0/hypothetical protein SORBIDRAFT_01g047460 [Sorghum bicolor]	GRMZM2G355846
GRMZM2G005107	17	4.07	9	2.15	11	2.63	seq=gene; coord=2:10282188..10285903:-1	GO:0016020//membrane;GO:0016020//membrane	-	-	gi|195621390|gb|ACG32525.1|/3.16046e-146/peroxisomal 2,4-dienoyl-CoA reductase [Zea mays]	GRMZM2G005107
GRMZM2G072054	158	37.83	133	31.84	180	43.1	seq=gene; coord=7:154540091..154546033:-1;IPR005810:Succinyl-CoA ligase, alpha subunit;IPR017440:ATP-citrate lyase/succinyl-CoA ligase, active site;IPR016102:Succinyl-CoA synthetase-like;IPR016040:NAD(P)-binding;IPR003781:CoA-binding;IPR005811:ATP-citrate lyase/succinyl-CoA ligase;	GO:0005739//mitochondrion	-	-	gi|242046092|ref|XP_002460917.1|/6.47329e-158/hypothetical protein SORBIDRAFT_02g037420 [Sorghum bicolor]	GRMZM2G072054
GRMZM2G125196	0	0	0	0	1	0.24	seq=gene; coord=2:217009167..217010684:1;IPR016040:NAD(P)-binding;IPR013149:Alcohol dehydrogenase, zinc-binding;	-	-	-	gi|224030727|gb|ACN34439.1|/0/unknown [Zea mays]	GRMZM2G125196
GRMZM2G180699	102	24.42	71	17	72	17.24	seq=gene; coord=3:216075380..216078229:1;IPR000008:C2 calcium-dependent membrane targeting;IPR008973:C2 calcium/lipid-binding region, CaLB;	-	-	-	gi|212722952|ref|NP_001132168.1|/2.6591e-78/hypothetical protein LOC100193590 [Zea mays]	GRMZM2G180699
GRMZM2G089421	805	192.74	1202	287.78	1160	277.73	seq=gene; coord=9:147816656..147818894:1;IPR018259:Ribosomal protein L21e, conserved site;IPR008991:Translation protein SH3-like;IPR001147:Ribosomal protein L21e;	GO:0005739//mitochondrion;GO:0005739//mitochondrion	-	-	gi|223946149|gb|ACN27158.1|/6.84497e-92/unknown [Zea mays]	GRMZM2G089421
GRMZM2G057973	43	10.3	68	16.28	85	20.35	seq=gene; coord=1:294759409..294764798:1;IPR003980:Histamine H3 receptor;IPR008507:Protein of unknown function DUF789;IPR003980:Histamine H3 receptor;IPR008507:Protein of unknown function DUF789;IPR008507:Protein of unknown function DUF789;IPR008507:Protein of unknown function DUF789;	GO:0009536//plastid;GO:0009536//plastid;GO:0009536//plastid	-	-	gi|223944513|gb|ACN26340.1|/0/unknown [Zea mays]	GRMZM2G057973
GRMZM2G033855	0	0	2	0.48	0	0	seq=gene; coord=4:231907784..231908338:1;IPR011016:Zinc finger, RING-CH-type;IPR001841:Zinc finger, RING-type;	-	-	-	gi|242064652|ref|XP_002453615.1|/1.73517e-49/hypothetical protein SORBIDRAFT_04g009010 [Sorghum bicolor]	GRMZM2G033855
GRMZM2G169782	15	3.59	6	1.44	4	0.96	seq=gene; coord=3:189300104..189303004:1;IPR000104:Antifreeze protein, type I;IPR000210:BTB/POZ-like;IPR011333:BTB/POZ fold;IPR004249:NPH3;	-	-	-	gi|212275352|ref|NP_001130814.1|/0/hypothetical protein LOC100191918 [Zea mays]	GRMZM2G169782
GRMZM2G317262	36	8.62	26	6.22	70	16.76	seq=gene; coord=9:129210840..129212611:1;IPR001810:Cyclin-like F-box;	-	-	-	gi|242041097|ref|XP_002467943.1|/1.60044e-127/hypothetical protein SORBIDRAFT_01g036900 [Sorghum bicolor]	GRMZM2G317262
GRMZM2G135904	415	99.36	278	66.56	313	74.94	seq=gene; coord=5:58340115..58345603:1;IPR001245:Tyrosine protein kinase;IPR011009:Protein kinase-like;IPR017442:Serine/threonine protein kinase-related;IPR002290:Serine/threonine protein kinase;IPR001245:Tyrosine protein kinase;IPR017441:Protein kinase, ATP binding site;IPR003527:MAP kinase, conserved site;IPR002290:Serine/threonine protein kinase;IPR011009:Protein kinase-like;IPR017442:Serine/t…	GO:0005739//mitochondrion;GO:0005739//mitochondrion	GO:0016301//kinase activity;GO:0005524//ATP binding;GO:0016301//kinase activity;GO:0005524//ATP binding	GO:0006468//protein amino acid phosphorylation;GO:0006468//protein amino acid phosphorylation	gi|219887085|gb|ACL53917.1|/0/unknown [Zea mays]	GRMZM2G135904
GRMZM2G055450	97	23.22	66	15.8	90	21.55	seq=gene; coord=3:204455148..204461700:-1;IPR013809:Epsin-like, N-terminal;IPR008942:ENTH/VHS;IPR011417:ANTH;IPR001026:Epsin, N-terminal;	-	-	-	gi|223950489|gb|ACN29328.1|/0/unknown [Zea mays]	GRMZM2G055450
GRMZM2G056495	14	3.35	1	0.24	1	0.24	seq=gene; coord=3:173630296..173635625:1;IPR007717:NPL4;IPR007717:NPL4;	-	-	-	gi|226529197|ref|NP_001141001.1|/0/hypothetical protein LOC100273080 [Zea mays]	GRMZM2G056495
GRMZM2G083394	9	2.15	47	11.25	48	11.49	seq=gene; coord=8:16030301..16035411:-1;IPR006651:Kelch;IPR013989:Development and cell death domain;IPR006652:Kelch repeat type 1;IPR000169:Peptidase, cysteine peptidase active site;IPR011043:Galactose oxidase/kelch, beta-propeller;IPR011498:Kelch repeat type 2;IPR006651:Kelch;IPR011043:Galactose oxidase/kelch, beta-propeller;IPR013989:Development and cell death domain;IPR006652:Kelch repeat type…	-	-	-	gi|242051987|ref|XP_002455139.1|/0/hypothetical protein SORBIDRAFT_03g004960 [Sorghum bicolor]	GRMZM2G083394
GRMZM2G168760	148	35.44	244	58.42	467	111.81	seq=gene; coord=9:152006551..152040016:-1	-	-	-	gi|242035353|ref|XP_002465071.1|/0/hypothetical protein SORBIDRAFT_01g031580 [Sorghum bicolor]	GRMZM2G168760
GRMZM2G319357	151	36.15	154	36.87	189	45.25	seq=gene; coord=1:204627716..204634140:-1;IPR000106:Protein-tyrosine phosphatase/arsenate reductase;IPR017867:Protein-tyrosine phosphatase, low molecular weight;	GO:0009536//plastid;GO:0009536//plastid;GO:0009536//plastid	-	-	gi|226501280|ref|NP_001149867.1|/1.81061e-117/low molecular weight protein-tyrosine-phosphatase slr0328 [Zea mays]	GRMZM2G319357
GRMZM2G057602	2	0.48	0	0	2	0.48	seq=gene; coord=9:35302000..35304367:-1	-	-	-	gi|226492958|ref|NP_001143706.1|/6.99252e-156/hypothetical protein LOC100276444 [Zea mays]	GRMZM2G057602
GRMZM2G086084	94	22.51	271	64.88	304	72.78	seq=gene; coord=1:234917109..234919531:-1;IPR000504:RNA recognition motif, RNP-1;	-	-	-	gi|293333104|ref|NP_001169336.1|/4.16672e-139/hypothetical protein LOC100383203 [Zea mays]	GRMZM2G086084
GRMZM2G467576	0	0	0	0	1	0.24	seq=gene; coord=10:3624137..3624784:-1;IPR011016:Zinc finger, RING-CH-type;IPR001841:Zinc finger, RING-type;	-	-	-	gi|242084694|ref|XP_002442772.1|/2.3214e-31/hypothetical protein SORBIDRAFT_08g002630 [Sorghum bicolor]	GRMZM2G467576
GRMZM2G439784	0	0	0	0	3	0.72	seq=gene; coord=3:228678659..228681556:-1;IPR013210:Leucine-rich repeat, N-terminal;IPR001611:Leucine-rich repeat;IPR003591:Leucine-rich repeat, typical subtype;	-	-	-	gi|242078575|ref|XP_002444056.1|/0/hypothetical protein SORBIDRAFT_07g006470 [Sorghum bicolor]	GRMZM2G439784
GRMZM2G147869	27	6.46	108	25.86	117	28.01	seq=gene; coord=6:129066326..129067932:1	-	-	-	gi|115486683|ref|NP_001068485.1|/3.8688e-117/Os11g0688000 [Oryza sativa (japonica cultivar-group)]	GRMZM2G147869
GRMZM2G088242	15	3.59	18	4.31	19	4.55	seq=gene; coord=2:182108540..182110610:1;IPR000232:Heat shock factor (HSF)-type, DNA-binding;	-	-	-	gi|226497186|ref|NP_001150223.1|/6.88043e-119/AT-HSFB4 [Zea mays]	GRMZM2G088242
GRMZM2G031317	127	30.41	0	0	0	0	seq=gene; coord=10:4262651..4263663:-1;IPR009438:Phytosulfokine;	GO:0016023//cytoplasmic membrane-bounded vesicle	-	-	gi|226496735|ref|NP_001147704.1|/1.69745e-39/LOC100281314 [Zea mays]	GRMZM2G031317
GRMZM2G148180	79	18.91	98	23.46	100	23.94	seq=gene; coord=9:110728440..110732747:-1;IPR017997:Vinculin;IPR000104:Antifreeze protein, type I;IPR003409:MORN motif;IPR000104:Antifreeze protein, type I;IPR003409:MORN motif;IPR000104:Antifreeze protein, type I;IPR003409:MORN motif;	-	GO:0005515//protein binding	-	gi|212721542|ref|NP_001131541.1|/2.60258e-79/hypothetical protein LOC100192881 [Zea mays]	GRMZM2G148180
GRMZM2G053023	200	47.89	198	47.4	244	58.42	seq=gene; coord=1:288031338..288034041:1;IPR006662:Thioredoxin-like subdomain;IPR017937:Thioredoxin, conserved site;IPR012336:Thioredoxin-like fold;IPR013766:Thioredoxin domain;IPR006662:Thioredoxin-like subdomain;IPR017937:Thioredoxin, conserved site;IPR012336:Thioredoxin-like fold;IPR013766:Thioredoxin domain;IPR006662:Thioredoxin-like subdomain;IPR017937:Thioredoxin, conserved site;IPR012336:T…	-	-	-	gi|195607526|gb|ACG25593.1|/8.52644e-60/thioredoxin H-type 5 [Zea mays]	GRMZM2G053023
GRMZM2G702980	0	0	1	0.24	0	0	seq=gene; coord=2:25203853..25204104:-1	-	-	-	-	GRMZM2G702980
GRMZM2G405133	1	0.24	0	0	0	0	seq=gene; coord=6:115076077..115079295:1	-	-	-	gi|242095308|ref|XP_002438144.1|/3.09443e-101/hypothetical protein SORBIDRAFT_10g008750 [Sorghum bicolor]	GRMZM2G405133
GRMZM2G377373	4	0.96	9	2.15	4	0.96	seq=gene; coord=1:107003023..107004279:1;IPR001810:Cyclin-like F-box;	GO:0008287//protein serine/threonine phosphatase complex	GO:0004722//protein serine/threonine phosphatase activity	GO:0006470//protein amino acid dephosphorylation	gi|242066264|ref|XP_002454421.1|/9.1265e-22/hypothetical protein SORBIDRAFT_04g030550 [Sorghum bicolor]	GRMZM2G377373
GRMZM2G355343	1	0.24	5	1.2	1	0.24	seq=gene; coord=3:189327753..189329122:-1	-	-	-	gi|226505964|ref|NP_001151653.1|/2.60671e-63/SR protein related family member [Zea mays]	GRMZM2G355343
GRMZM2G075782	12	2.87	6	1.44	7	1.68	seq=gene; coord=6:152927439..152928526:-1;IPR011016:Zinc finger, RING-CH-type;IPR001841:Zinc finger, RING-type;	-	-	-	gi|238012678|gb|ACR37374.1|/4.62643e-78/unknown [Zea mays]	GRMZM2G075782
AC210013.4_FG009	68	16.28	89	21.31	33	7.9	seq=gene; coord=5:3342073..3344455:1;IPR000104:Antifreeze protein, type I	-	-	-	gi|242032559|ref|XP_002463674.1|/4.52074e-126/hypothetical protein SORBIDRAFT_01g004016 [Sorghum bicolor]	AC210013.4_FG009
GRMZM2G379179	101	24.18	41	9.82	34	8.14	seq=gene; coord=1:182202650..182204270:1;IPR006578:MADF domain;	-	-	-	gi|226503459|ref|NP_001145889.1|/4.31971e-116/hypothetical protein LOC100279405 [Zea mays]	GRMZM2G379179
GRMZM2G164912	10	2.39	16	3.83	8	1.92	seq=gene; coord=5:201430317..201433428:-1;IPR000104:Antifreeze protein, type I;IPR008166:Protein of unknown function DUF23;	-	-	-	gi|224028871|gb|ACN33511.1|/0/unknown [Zea mays]	GRMZM2G164912
GRMZM2G100741	10	2.39	44	10.53	37	8.86	seq=gene; coord=7:154103530..154105666:1	-	-	-	gi|226496695|ref|NP_001144788.1|/1.22381e-103/hypothetical protein LOC100277857 [Zea mays]	GRMZM2G100741
GRMZM2G108149	554	132.64	372	89.06	514	123.06	seq=gene; coord=9:97916688..97920954:1;IPR001565:Synaptotagmin;IPR008973:C2 calcium/lipid-binding region, CaLB;IPR000008:C2 calcium-dependent membrane targeting;IPR013583:Phosphoribosyltransferase C-terminal, plant;IPR005829:Sugar transporter, conserved site;IPR001565:Synaptotagmin;IPR005829:Sugar transporter, conserved site;IPR000008:C2 calcium-dependent membrane targeting;IPR008973:C2 calcium/l…	-	-	-	gi|242096380|ref|XP_002438680.1|/0/hypothetical protein SORBIDRAFT_10g024200 [Sorghum bicolor]	GRMZM2G108149
GRMZM2G000777	46	11.01	51	12.21	32	7.66	seq=gene; coord=8:88309298..88310261:1	-	-	-	gi|195606802|gb|ACG25231.1|/1.70163e-49/late embryogenesis abundant protein [Zea mays]	GRMZM2G000777
AC191009.3_FG004	229	54.83	275	65.84	235	56.26	seq=gene; coord=1:297380856..297383007:1	-	-	-	gi|219885691|gb|ACL53220.1|/5.23275e-13/unknown [Zea mays]	AC191009.3_FG004
GRMZM2G056608	21	5.03	38	9.1	46	11.01	seq=gene; coord=7:148521490..148527990:1	-	-	-	gi|242045854|ref|XP_002460798.1|/0/hypothetical protein SORBIDRAFT_02g035080 [Sorghum bicolor]	GRMZM2G056608
GRMZM2G086066	1	0.24	1	0.24	0	0	seq=gene; coord=7:93929691..93930940:1;IPR006121:Heavy metal transport/detoxification protein;	-	-	-	gi|223946065|gb|ACN27116.1|/4.47222e-63/unknown [Zea mays]	GRMZM2G086066
GRMZM2G144841	190	45.49	84	20.11	190	45.49	seq=gene; coord=9:109980698..109983999:1	GO:0005739//mitochondrion	-	-	gi|226495979|ref|NP_001148020.1|/2.95548e-51/TOM2B [Zea mays]	GRMZM2G144841
GRMZM2G333875	95	22.75	25	5.99	48	11.49	seq=gene; coord=6:87595138..87605497:-1	GO:0016023//cytoplasmic membrane-bounded vesicle	-	-	gi|115469630|ref|NP_001058414.1|/3.9717e-174/Os06g0689600 [Oryza sativa (japonica cultivar-group)]	GRMZM2G333875
GRMZM2G139952	117	28.01	281	67.28	387	92.66	seq=gene; coord=8:3927774..3934410:-1;IPR006607:Protein of unknown function DM15;	-	-	-	gi|239047078|ref|NP_001131668.2|/8.13256e-169/hypothetical protein LOC100193028 [Zea mays]	GRMZM2G139952
GRMZM2G140885	18	4.31	46	11.01	32	7.66	seq=gene; coord=8:1328003..1332852:1;IPR011004:Trimeric LpxA-like;IPR001451:Bacterial transferase hexapeptide repeat;IPR011004:Trimeric LpxA-like;IPR001451:Bacterial transferase hexapeptide repeat;	-	-	-	gi|242052663|ref|XP_002455477.1|/2.65461e-120/hypothetical protein SORBIDRAFT_03g011540 [Sorghum bicolor]	GRMZM2G140885
GRMZM2G463498	2	0.48	1	0.24	1	0.24	seq=gene; coord=8:17100924..17105088:-1	GO:0016020//membrane;GO:0016023//cytoplasmic membrane-bounded vesicle	GO:0005515//protein binding	-	gi|242056249|ref|XP_002457270.1|/0/hypothetical protein SORBIDRAFT_03g004520 [Sorghum bicolor]	GRMZM2G463498
GRMZM2G103166	82	19.63	249	59.61	175	41.9	seq=gene; coord=6:67819967..67824159:1;IPR001487:Bromodomain;IPR001399:VP6 blue-tongue virus inner capsid protein;IPR001487:Bromodomain;	-	-	-	gi|194696466|gb|ACF82317.1|/3.0905e-117/unknown [Zea mays]	GRMZM2G103166
GRMZM2G042292	33	7.9	114	27.29	57	13.65	seq=gene; coord=3:129489623..129492614:-1	-	-	-	gi|226509662|ref|NP_001145747.1|/0/hypothetical protein LOC100279254 [Zea mays]	GRMZM2G042292
GRMZM2G420926	19	4.55	23	5.51	37	8.86	seq=gene; coord=9:147125326..147131810:1;IPR006186:Serine/threonine-specific protein phosphatase and bis(5-nucleosyl)-tetraphosphatase;IPR004843:Metallophosphoesterase;IPR006186:Serine/threonine-specific protein phosphatase and bis(5-nucleosyl)-tetraphosphatase;IPR004843:Metallophosphoesterase;IPR006186:Serine/threonine-specific protein phosphatase and bis(5-nucleosyl)-tetraphosphatase;	-	-	-	gi|212274515|ref|NP_001130096.1|/0/hypothetical protein LOC100191189 [Zea mays]	GRMZM2G420926
GRMZM2G124593	17	4.07	68	16.28	118	28.25	seq=gene; coord=4:12914620..12923769:-1;IPR015793:Pyruvate kinase, barrel;IPR001697:Pyruvate kinase;IPR015813:Pyruvate/Phosphoenolpyruvate kinase, catalytic core;IPR015795:Pyruvate kinase, C-terminal-like;IPR015794:Pyruvate kinase, alpha/beta;IPR015793:Pyruvate kinase, barrel;IPR001697:Pyruvate kinase;IPR015813:Pyruvate/Phosphoenolpyruvate kinase, catalytic core;IPR015795:Pyruvate kinase, C-termi…	-	-	-	gi|212276284|ref|NP_001130271.1|/0/hypothetical protein LOC100191365 [Zea mays]	GRMZM2G124593
GRMZM2G052546	238	56.98	145	34.72	232	55.55	seq=gene; coord=1:2522932..2529513:-1;IPR000340:Protein-tyrosine phosphatase, dual specificity;IPR000340:Protein-tyrosine phosphatase, dual specificity;IPR000340:Protein-tyrosine phosphatase, dual specificity;IPR004193:Glycoside hydrolase, family 13, N-terminal;IPR000340:Protein-tyrosine phosphatase, dual specificity;IPR004193:Glycoside hydrolase, family 13, N-terminal;	-	GO:0005515//protein binding;GO:0005515//protein binding;GO:0005515//protein binding;GO:0005515//protein binding;GO:0005515//protein binding	-	gi|219362899|ref|NP_001136639.1|/0/hypothetical protein LOC100216768 [Zea mays]	GRMZM2G052546
GRMZM2G023769	8	1.92	63	15.08	125	29.93	seq=gene; coord=6:143008597..143014541:1	-	-	-	gi|242090389|ref|XP_002441027.1|/5.37341e-68/hypothetical protein SORBIDRAFT_09g019120 [Sorghum bicolor]	GRMZM2G023769
GRMZM2G022934	5	1.2	63	15.08	6	1.44	seq=gene; coord=3:188069119..188078922:-1;IPR000639:Epoxide hydrolase-like;IPR012336:Thioredoxin-like fold;IPR000073:Alpha/beta hydrolase fold-1;IPR000639:Epoxide hydrolase-like;IPR012336:Thioredoxin-like fold;	-	GO:0003824//catalytic activity;GO:0003824//catalytic activity	GO:0006629//lipid metabolic process;GO:0006629//lipid metabolic process	gi|242054635|ref|XP_002456463.1|/3.45214e-87/hypothetical protein SORBIDRAFT_03g036770 [Sorghum bicolor]	GRMZM2G022934
GRMZM2G110289	46	11.01	75	17.96	92	22.03	seq=gene; coord=9:2323473..2329971:1;IPR003590:Leucine-rich repeat, ribonuclease inhibitor subtype;	-	-	-	gi|242095286|ref|XP_002438133.1|/0/hypothetical protein SORBIDRAFT_10g008560 [Sorghum bicolor]	GRMZM2G110289
GRMZM2G026490	249	59.62	272	65.12	178	42.62	seq=gene; coord=5:146880687..146886685:-1;IPR001258:NHL repeat;	-	-	-	gi|226504928|ref|NP_001143593.1|/0/hypothetical protein LOC100276297 [Zea mays]	GRMZM2G026490
GRMZM2G160064	46	11.01	66	15.8	116	27.77	seq=gene; coord=5:2525628..2527728:1	-	GO:0046872//metal ion binding	-	gi|226508772|ref|NP_001151149.1|/9.19364e-95/metal ion binding protein [Zea mays]	GRMZM2G160064
GRMZM2G045082	2	0.48	1	0.24	1	0.24	seq=gene; coord=1:222799928..222800646:-1	GO:0016023//cytoplasmic membrane-bounded vesicle	-	-	gi|195638706|gb|ACG38821.1|/3.67065e-33/hypothetical protein [Zea mays]	GRMZM2G045082
GRMZM2G003426	4	0.96	4	0.96	15	3.59	seq=gene; coord=1:218201136..218201968:-1	-	-	-	gi|212720879|ref|NP_001131954.1|/2.99059e-25/hypothetical protein LOC100193349 [Zea mays]	GRMZM2G003426
GRMZM2G038501	0	0	0	0	1	0.24	seq=gene; coord=10:68302216..68303377:1	-	-	-	gi|226501866|ref|NP_001140547.1|/8.42415e-73/hypothetical protein LOC100272612 [Zea mays]	GRMZM2G038501
GRMZM2G018022	3	0.72	0	0	21	5.03	seq=gene; coord=3:148756247..148761160:1;IPR005824:KOW;IPR002618:UTP--glucose-1-phosphate uridylyltransferase;IPR013845:Ribosomal protein S4e, central;	-	GO:0004181//metallocarboxypeptidase activity	-	gi|223947323|gb|ACN27745.1|/1.57105e-61/unknown [Zea mays]	GRMZM2G018022
GRMZM2G126190	453	108.46	473	113.24	945	226.25	seq=gene; coord=4:219854617..219857312:1;IPR004000:Actin/actin-like;IPR004001:Actin, conserved site;IPR004000:Actin/actin-like;IPR004001:Actin, conserved site;IPR004000:Actin/actin-like;IPR004001:Actin, conserved site;	GO:0005856//cytoskeleton;GO:0005737//cytoplasm;GO:0005856//cytoskeleton;GO:0005737//cytoplasm;GO:0005856//cytoskeleton;GO:0005737//cytoplasm	GO:0005524//ATP binding;GO:0005515//protein binding;GO:0005524//ATP binding;GO:0005515//protein binding;GO:0005524//ATP binding;GO:0005515//protein binding	-	gi|226493041|ref|NP_001150248.1|/0/LOC100283878 [Zea mays]	GRMZM2G126190
GRMZM2G160460	133	31.84	112	26.81	83	19.87	seq=gene; coord=6:165229132..165235000:1;IPR003663:Sugar/inositol transporter;IPR002208:SecY protein;IPR001958:Tetracycline resistance protein, TetA;IPR001991:Sodium:dicarboxylate symporter;IPR005829:Sugar transporter, conserved site;IPR016196:Major facilitator superfamily, general substrate transporter;IPR005828:General substrate transporter;IPR011701:Major facilitator superfamily MFS-1;IPR00366…	GO:0016020//membrane;GO:0016020//membrane;GO:0016020//membrane	-	-	gi|226529946|ref|NP_001147831.1|/0/solute carrier family 2, facilitated glucose transporter member 8 [Zea mays]	GRMZM2G160460
GRMZM2G026962	332	79.49	690	165.2	585	140.06	seq=gene; coord=6:98551564..98561678:-1;IPR006599:CARP motif;IPR013912:Adenylate cyclase-associated CAP, C-terminal;IPR012945:Tubulin binding cofactor C;IPR013912:Adenylate cyclase-associated CAP, C-terminal;IPR012945:Tubulin binding cofactor C;IPR006599:CARP motif;	-	-	-	gi|293336649|ref|NP_001168301.1|/0/hypothetical protein LOC100382067 [Zea mays]	GRMZM2G026962
GRMZM2G031586	280	67.04	8	1.92	380	90.98	seq=gene; coord=10:141579569..141582010:1;IPR000104:Antifreeze protein, type I;IPR000104:Antifreeze protein, type I;	-	-	-	gi|226498446|ref|NP_001145312.1|/3.28914e-14/hypothetical protein LOC100278620 [Zea mays]	GRMZM2G031586
GRMZM2G180458	76	18.2	310	74.22	7	1.68	seq=gene; coord=1:29359134..29360998:1;IPR000626:Ubiquitin;IPR001810:Cyclin-like F-box;	-	-	-	gi|242041661|ref|XP_002468225.1|/0/hypothetical protein SORBIDRAFT_01g042080 [Sorghum bicolor]	GRMZM2G180458
GRMZM2G143234	558	133.6	669	160.17	383	91.7	seq=gene; coord=3:222871833..222873998:1;IPR006721:ATPase, F1 complex, epsilon subunit, mitochondrial;IPR006721:ATPase, F1 complex, epsilon subunit, mitochondrial;IPR006721:ATPase, F1 complex, epsilon subunit, mitochondrial;	GO:0000275//mitochondrial proton-transporting ATP synthase complex, catalytic core F(1);GO:0000275//mitochondrial proton-transporting ATP synthase complex, catalytic core F(1);GO:0000275//mitochondrial proton-transporting ATP synthase complex, catalytic core F(1)	GO:0046933//hydrogen ion transporting ATP synthase activity, rotational mechanism;GO:0046961//proton-transporting ATPase activity, rotational mechanism;GO:0046933//hydrogen ion transporting ATP synthase activity, rotational mechanism;GO:0046961//proton-transporting ATPase activity, rotational mechanism;GO:0046933//hydrogen ion transporting ATP synthase activity, rotational mechanism;GO:0046961//p…	GO:0015986//ATP synthesis coupled proton transport;GO:0015986//ATP synthesis coupled proton transport;GO:0015986//ATP synthesis coupled proton transport	gi|195658915|gb|ACG48925.1|/1.40149e-29/ATP synthase epsilon chain, mitochondrial [Zea mays]	GRMZM2G143234
GRMZM2G103740	18	4.31	95	22.74	118	28.25	seq=gene; coord=10:10155070..10159006:1;IPR001270:Chaperonin clpA/B;IPR014001:DEAD-like helicase, N-terminal;IPR003593:ATPase, AAA+ type, core;IPR008921:DNA polymerase III clamp loader subunit, C-terminal;IPR003959:ATPase, AAA-type, core;IPR013748:Replication factor C;	-	-	-	gi|194700788|gb|ACF84478.1|/1.72638e-175/unknown [Zea mays]	GRMZM2G103740
GRMZM2G025356	50	11.97	131	31.36	131	31.36	seq=gene; coord=4:245351948..245355913:-1;IPR001514:DNA-directed RNA polymerase, 30-40 kDa subunit, conserved site;IPR011263:DNA-directed RNA polymerase, RpoA/D/Rpb3-type;IPR009025:DNA-directed RNA polymerase, RBP11-like;IPR011261:DNA-directed RNA polymerase, dimerisation;IPR011262:DNA-directed RNA polymerase, insert;	-	-	-	gi|212276110|ref|NP_001130839.1|/6.22429e-19/hypothetical protein LOC100191943 [Zea mays]	GRMZM2G025356
GRMZM2G325612	73	17.48	45	10.77	6	1.44	seq=gene; coord=8:22273605..22277631:1	-	-	-	gi|242051715|ref|XP_002455003.1|/0/hypothetical protein SORBIDRAFT_03g002810 [Sorghum bicolor]	GRMZM2G325612
GRMZM2G181206	7	1.68	2	0.48	3	0.72	seq=gene; coord=6:148291425..148297832:-1;IPR003864:Protein of unknown function DUF221;	GO:0016023//cytoplasmic membrane-bounded vesicle;GO:0016020//membrane	-	-	gi|242090595|ref|XP_002441130.1|/0/hypothetical protein SORBIDRAFT_09g021010 [Sorghum bicolor]	GRMZM2G181206
GRMZM2G112626	13	3.11	10	2.39	9	2.15	seq=gene; coord=5:198043976..198048967:-1;IPR003095:Heat shock protein DnaJ;IPR001623:Heat shock protein DnaJ, N-terminal;IPR003095:Heat shock protein DnaJ;IPR001623:Heat shock protein DnaJ, N-terminal;IPR003095:Heat shock protein DnaJ;IPR001623:Heat shock protein DnaJ, N-terminal;	-	-	-	gi|226495593|ref|NP_001140350.1|/8.29376e-67/hypothetical protein LOC100272398 [Zea mays]	GRMZM2G112626
GRMZM2G129122	3	0.72	0	0	0	0	seq=gene; coord=10:140563475..140566795:-1	-	-	-	gi|226504280|ref|NP_001146711.1|/0/hypothetical protein LOC100280313 [Zea mays]	GRMZM2G129122
GRMZM2G007300	202	48.36	122	29.21	77	18.44	seq=gene; coord=3:179691239..179696023:1;IPR016135:Ubiquitin-conjugating enzyme/RWD-like;IPR000608:Ubiquitin-conjugating enzyme, E2;IPR000608:Ubiquitin-conjugating enzyme, E2;IPR016135:Ubiquitin-conjugating enzyme/RWD-like;IPR000608:Ubiquitin-conjugating enzyme, E2;IPR016135:Ubiquitin-conjugating enzyme/RWD-like;	-	GO:0004842//ubiquitin-protein ligase activity;GO:0004842//ubiquitin-protein ligase activity;GO:0004842//ubiquitin-protein ligase activity	GO:0016579//protein deubiquitination;GO:0019941//modification-dependent protein catabolic process;GO:0051246//regulation of protein metabolic process;GO:0016579//protein deubiquitination;GO:0019941//modification-dependent protein catabolic process;GO:0051246//regulation of protein metabolic process;GO:0016579//protein deubiquitination;GO:0019941//modification-dependent protein catabolic process;G…	gi|226497270|ref|NP_001149480.1|/6.03242e-87/ubiquitin-conjugating enzyme E2 7 [Zea mays]	GRMZM2G007300
GRMZM2G403797	31	7.42	23	5.51	26	6.22	seq=gene; coord=8:70569956..70572034:1;IPR001578:Peptidase C12, ubiquitin carboxyl-terminal hydrolase 1;	-	-	-	gi|226506360|ref|NP_001144434.1|/0/hypothetical protein LOC100277394 [Zea mays]	GRMZM2G403797
GRMZM2G158300	13	3.11	8	1.92	6	1.44	seq=gene; coord=10:113193301..113194880:-1;IPR007749:Protein of unknown function DUF677;	-	-	-	gi|226496395|ref|NP_001141896.1|/5.99751e-139/hypothetical protein LOC100274043 [Zea mays]	GRMZM2G158300
GRMZM2G138230	98	23.46	166	39.74	170	40.7	seq=gene; coord=7:144922668..144933147:-1;IPR014001:DEAD-like helicase, N-terminal;IPR003593:ATPase, AAA+ type, core;IPR000194:ATPase, F1/V1/A1 complex, alpha/beta subunit, nucleotide-binding;IPR014001:DEAD-like helicase, N-terminal;IPR003593:ATPase, AAA+ type, core;IPR000194:ATPase, F1/V1/A1 complex, alpha/beta subunit, nucleotide-binding;IPR000194:ATPase, F1/V1/A1 complex, alpha/beta subunit, n…	-	GO:0017111//nucleoside-triphosphatase activity;GO:0005524//ATP binding;GO:0003677//DNA binding;GO:0017111//nucleoside-triphosphatase activity;GO:0005524//ATP binding;GO:0003677//DNA binding;GO:0017111//nucleoside-triphosphatase activity;GO:0005524//ATP binding;GO:0003677//DNA binding;GO:0017111//nucleoside-triphosphatase activity;GO:0005524//ATP binding;GO:0003677//DNA binding	-	gi|242045720|ref|XP_002460731.1|/0/hypothetical protein SORBIDRAFT_02g033940 [Sorghum bicolor]	GRMZM2G138230
GRMZM2G126447	196	46.93	144	34.48	217	51.95	seq=gene; coord=5:143966959..143977764:1;IPR002893:Zinc finger, MYND-type;IPR011024:Gamma-crystallin related;IPR018378:C-type lectin, conserved site;IPR000223:Peptidase S26A, signal peptidase I;IPR018200:Peptidase C19, ubiquitin carboxyl-terminal hydrolase 2, conserved site;IPR002893:Zinc finger, MYND-type;IPR011024:Gamma-crystallin related;IPR001394:Peptidase C19, ubiquitin carboxyl-terminal hyd…	-	-	-	gi|242064616|ref|XP_002453597.1|/0/hypothetical protein SORBIDRAFT_04g008750 [Sorghum bicolor]	GRMZM2G126447
GRMZM2G075956	28	6.7	288	68.95	381	91.22	seq=gene; coord=8:164795356..164798628:-1;IPR007087:Zinc finger, C2H2-type;IPR015880:Zinc finger, C2H2-like;IPR007087:Zinc finger, C2H2-type;IPR015880:Zinc finger, C2H2-like;	GO:0005634//nucleus;GO:0005634//nucleus	GO:0030528//transcription regulator activity;GO:0030528//transcription regulator activity	GO:0045449//regulation of transcription;GO:0045449//regulation of transcription	gi|223942683|gb|ACN25425.1|/0/unknown [Zea mays]	GRMZM2G075956
GRMZM2G429982	8410	2013.59	5110	1223.42	7497	1794.94	seq=gene; coord=3:179516878..179518095:1;IPR001938:Thaumatin, pathogenesis-related;	GO:0016023//cytoplasmic membrane-bounded vesicle	-	-	gi|226508544|ref|NP_001147098.1|/3.14542e-134/osmotin-like protein [Zea mays]	GRMZM2G429982
GRMZM2G125004	5	1.2	2	0.48	2	0.48	seq=gene; coord=2:208500183..208502173:1;IPR000923:Blue (type 1) copper domain;IPR001810:Cyclin-like F-box;IPR011043:Galactose oxidase/kelch, beta-propeller;	-	-	-	gi|55741098|gb|AAV64236.1|/1.9045e-132/F-box protein [Zea mays]	GRMZM2G125004
GRMZM2G070259	22	5.27	85	20.35	31	7.42	seq=gene; coord=1:4965513..4967726:1;IPR002343:Paraneoplastic encephalomyelitis antigen;IPR000504:RNA recognition motif, RNP-1;IPR002343:Paraneoplastic encephalomyelitis antigen;IPR000504:RNA recognition motif, RNP-1;	-	-	-	gi|226532724|ref|NP_001151236.1|/5.26825e-122/RNA binding protein [Zea mays]	GRMZM2G070259
GRMZM2G050701	8	1.92	23	5.51	12	2.87	seq=gene; coord=6:94104882..94111449:1;IPR001245:Tyrosine protein kinase;IPR017441:Protein kinase, ATP binding site;IPR011009:Protein kinase-like;IPR001245:Tyrosine protein kinase;IPR011009:Protein kinase-like;IPR017442:Serine/threonine protein kinase-related;IPR002290:Serine/threonine protein kinase;IPR017441:Protein kinase, ATP binding site;IPR008271:Serine/threonine protein kinase, active site;	-	-	-	gi|226532052|ref|NP_001150204.1|/0/protein kinase APK1B [Zea mays]	GRMZM2G050701
GRMZM2G179703	162	38.79	25	5.99	68	16.28	seq=gene; coord=UNKNOWN:6167295..6169841:1;IPR000104:Antifreeze protein, type I;IPR003480:Transferase;	-	-	-	gi|238015264|gb|ACR38667.1|/2.29905e-133/unknown [Zea mays]	GRMZM2G179703
GRMZM2G007842	28	6.7	17	4.07	27	6.46	seq=gene; coord=8:62708833..62712419:-1	-	-	-	gi|194693050|gb|ACF80609.1|/1.05252e-69/unknown [Zea mays]	GRMZM2G007842
GRMZM2G176173	0	0	1	0.24	0	0	seq=gene; coord=4:25608461..25609615:-1;IPR000315:Zinc finger, B-box;IPR010402:CCT domain;	-	-	-	gi|293332859|ref|NP_001169929.1|/1.41925e-88/hypothetical protein LOC100383826 [Zea mays]	GRMZM2G176173
GRMZM2G095931	280	67.04	635	152.03	319	76.38	seq=gene; coord=1:214838418..214842832:1;IPR018325:DNA repair protein Rad4, transglutaminase-like domain;IPR018326:DNA repair protein Rad4, DNA-binding domain 1;IPR018327:DNA repair protein Rad4, DNA-binding domain 2;IPR018328:DNA repair protein Rad4, DNA-binding domain 3;	-	-	-	gi|242079205|ref|XP_002444371.1|/0/hypothetical protein SORBIDRAFT_07g020840 [Sorghum bicolor]	GRMZM2G095931
GRMZM2G004583	37	8.86	123	29.45	95	22.74	seq=gene; coord=7:128351528..128362364:-1;IPR004394:Iojap-related protein;	-	-	-	gi|162463776|ref|NP_001105495.1|/5.09335e-101/iojap striping1 [Zea mays]	GRMZM2G004583
GRMZM2G041633	43	10.3	75	17.96	88	21.07	seq=gene; coord=2:187030958..187036515:1;IPR005491:ENT;IPR002999:Tudor;	-	-	-	gi|226495489|ref|NP_001150442.1|/0/LOC100284072 [Zea mays]	GRMZM2G041633
GRMZM2G096709	100	23.94	50	11.97	91	21.79	seq=gene; coord=7:139403805..139406484:1;IPR014978:Glutamine-Leucine-Glutamine, QLQ;IPR014977:WRC;IPR014978:Glutamine-Leucine-Glutamine, QLQ;	GO:0005634//nucleus	GO:0016818//hydrolase activity, acting on acid anhydrides, in phosphorus-containing anhydrides	GO:0045449//regulation of transcription	gi|162462131|ref|NP_001106028.1|/1.26055e-76/putative growth-regulating factor 10 [Zea mays]	GRMZM2G096709
GRMZM2G171807	0	0	0	0	3	0.72	seq=gene; coord=8:13255146..13267570:1;IPR001245:Tyrosine protein kinase;IPR002290:Serine/threonine protein kinase;IPR017441:Protein kinase, ATP binding site;IPR008271:Serine/threonine protein kinase, active site;IPR011009:Protein kinase-like;IPR017442:Serine/threonine protein kinase-related;IPR001245:Tyrosine protein kinase;IPR017441:Protein kinase, ATP binding site;IPR008271:Serine/threonine pr…	-	-	-	gi|293331483|ref|NP_001167990.1|/0/hypothetical protein LOC100381711 [Zea mays]	GRMZM2G171807
GRMZM2G107597	1	0.24	0	0	0	0	seq=gene; coord=1:57356830..57359958:1;IPR018169:MtN3 and saliva related transmembrane protein, conserved region;	-	-	-	gi|195638024|gb|ACG38480.1|/1.77328e-110/cytochrome c oxidoreductase [Zea mays]	GRMZM2G107597
GRMZM2G005909	37	8.86	22	5.27	18	4.31	seq=gene; coord=5:193133640..193135071:-1;IPR000092:Polyprenyl synthetase;IPR008949:Terpenoid synthase;	GO:0009536//plastid	GO:0004311//farnesyltranstransferase activity	GO:0051501	gi|148535925|gb|ABQ85649.1|/1.21107e-159/putative geranylgeranyl pyrophosphate synthase 4 [Zea mays]	GRMZM2G005909
GRMZM2G416386	1	0.24	1	0.24	0	0	seq=gene; coord=6:86291192..86297176:-1;IPR006220:Anthranilate synthase component II/delta crystallin;IPR005801:Anthranilate synthase component I and chorismate binding protein;IPR011702:Glutamine amidotransferase superfamily;IPR001317:Carbamoyl phosphate synthase, GATase region;IPR006221:Glutamine amidotransferase of anthranilate synthase;IPR005802:Para-aminobenzoate synthase, component I;IPR000…	-	-	-	gi|242094084|ref|XP_002437532.1|/0/hypothetical protein SORBIDRAFT_10g028850 [Sorghum bicolor]	GRMZM2G416386
GRMZM2G312838	124	29.69	77	18.44	41	9.82	seq=gene; coord=7:89616802..89618542:1;IPR008973:C2 calcium/lipid-binding region, CaLB;IPR000008:C2 calcium-dependent membrane targeting;IPR008973:C2 calcium/lipid-binding region, CaLB;IPR008973:C2 calcium/lipid-binding region, CaLB;IPR000008:C2 calcium-dependent membrane targeting;IPR008973:C2 calcium/lipid-binding region, CaLB;IPR008973:C2 calcium/lipid-binding region, CaLB;IPR008973:C2 calcium…	-	-	-	gi|226509018|ref|NP_001140230.1|/2.14375e-68/hypothetical protein LOC100272270 [Zea mays]	GRMZM2G312838
AC207628.4_FG006	1	0.24	7	1.68	4	0.96	seq=gene; coord=3:201154392..201165880:-1;IPR006046:Glycoside hydrolase family 13	-	GO:0043169//cation binding	-	gi|242054203|ref|XP_002456247.1|/0/hypothetical protein SORBIDRAFT_03g032830 [Sorghum bicolor]	AC207628.4_FG006
GRMZM2G008657	9	2.15	13	3.11	24	5.75	seq=gene; coord=7:72435829..72436850:1;IPR018607:Chromosome transmission fidelity protein 8;IPR018607:Chromosome transmission fidelity protein 8;	-	-	-	gi|242044268|ref|XP_002460005.1|/2.85766e-47/hypothetical protein SORBIDRAFT_02g020730 [Sorghum bicolor]	GRMZM2G008657
GRMZM2G045049	1	0.24	2	0.48	7	1.68	seq=gene; coord=2:4191603..4194697:1;IPR010918:AIR synthase related protein, C-terminal;	GO:0009536//plastid	-	-	gi|242077480|ref|XP_002448676.1|/0/hypothetical protein SORBIDRAFT_06g031310 [Sorghum bicolor]	GRMZM2G045049
GRMZM2G092123	2	0.48	1	0.24	2	0.48	seq=gene; coord=9:134097884..134107864:1;IPR002885:Pentatricopeptide repeat;IPR002885:Pentatricopeptide repeat;	-	-	-	gi|242036071|ref|XP_002465430.1|/0/hypothetical protein SORBIDRAFT_01g038770 [Sorghum bicolor]	GRMZM2G092123
GRMZM2G022861	30	7.18	44	10.53	36	8.62	seq=gene; coord=2:6012786..6022658:-1;IPR003938:Potassium channel, voltage-dependent, EAG/ELK/ERG;IPR000595:Cyclic nucleotide-binding;IPR018490:Cyclic nucleotide-binding-like;IPR005821:Ion transport;	-	-	-	gi|226531770|ref|NP_001147588.1|/0/LOC100281197 [Zea mays]	GRMZM2G022861
GRMZM2G166230	67	16.04	114	27.29	102	24.42	seq=gene; coord=2:154450833..154452369:-1;IPR010409:GAGA binding-like;IPR010409:GAGA binding-like;	-	-	-	gi|219884999|gb|ACL52874.1|/1.178e-97/unknown [Zea mays]	GRMZM2G166230
GRMZM2G451132	87	20.83	51	12.21	73	17.48	seq=gene; coord=7:142360902..142382662:-1;IPR001245:Tyrosine protein kinase;IPR000104:Antifreeze protein, type I;IPR002290:Serine/threonine protein kinase;IPR008271:Serine/threonine protein kinase, active site;IPR011009:Protein kinase-like;IPR002912:Amino acid-binding ACT;IPR017442:Serine/threonine protein kinase-related;IPR000104:Antifreeze protein, type I;	GO:0009536//plastid;GO:0009536//plastid	-	-	gi|226505358|ref|NP_001151481.1|/1.95087e-82/ATP binding protein [Zea mays]	GRMZM2G451132
GRMZM2G137558	617	147.73	594	142.21	708	169.51	seq=gene; coord=2:185501993..185504689:-1;IPR000403:Phosphatidylinositol 3- and 4-kinase, catalytic;	GO:0009536//plastid	-	-	gi|242049568|ref|XP_002462528.1|/0/hypothetical protein SORBIDRAFT_02g027450 [Sorghum bicolor]	GRMZM2G137558
GRMZM2G073860	73	17.48	147	35.19	57	13.65	seq=gene; coord=10:27454517..27457622:1;IPR008963:Purple acid phosphatase-like, N-terminal;IPR004843:Metallophosphoesterase;	GO:0016023//cytoplasmic membrane-bounded vesicle	GO:0046872//metal ion binding;GO:0003993//acid phosphatase activity	-	gi|219363589|ref|NP_001136973.1|/0/hypothetical protein LOC100217133 [Zea mays]	GRMZM2G073860
GRMZM2G009717	84	20.11	117	28.01	160	38.31	seq=gene; coord=6:158113563..158119501:1;IPR001810:Cyclin-like F-box;	-	-	-	gi|242088439|ref|XP_002440052.1|/4.05885e-174/hypothetical protein SORBIDRAFT_09g025120 [Sorghum bicolor]	GRMZM2G009717
GRMZM2G104024	122	29.21	0	0	0	0	seq=gene; coord=1:242259856..242260769:-1	-	-	-	gi|115481930|ref|NP_001064558.1|/1.97407e-31/Os10g0405300 [Oryza sativa (japonica cultivar-group)]	GRMZM2G104024
GRMZM2G044388	101	24.18	103	24.66	101	24.18	seq=gene; coord=1:3603859..3607143:-1;IPR001810:Cyclin-like F-box;IPR001810:Cyclin-like F-box;IPR001810:Cyclin-like F-box;IPR001810:Cyclin-like F-box;	-	-	-	gi|226509446|ref|NP_001142270.1|/1.05694e-148/hypothetical protein LOC100274439 [Zea mays]	GRMZM2G044388
GRMZM2G148098	24	5.75	31	7.42	26	6.22	seq=gene; coord=5:13583032..13587551:1;IPR000047:Helix-turn-helix motif, lambda-like repressor;IPR017970:Homeobox, conserved site;IPR006563:POX;IPR001356:Homeobox;IPR009057:Homeodomain-like;	-	-	-	gi|242033373|ref|XP_002464081.1|/0/hypothetical protein SORBIDRAFT_01g011960 [Sorghum bicolor]	GRMZM2G148098
GRMZM2G049141	60	14.37	76	18.2	90	21.55	seq=gene; coord=2:82566774..82586212:-1;IPR000225:Armadillo;IPR000569:HECT;IPR016024:Armadillo-type fold;IPR000357:HEAT;IPR000569:HECT;IPR016024:Armadillo-type fold;IPR000357:HEAT;IPR000225:Armadillo;	-	-	-	gi|242075234|ref|XP_002447553.1|/0/hypothetical protein SORBIDRAFT_06g003290 [Sorghum bicolor]	GRMZM2G049141
AC200057.4_FG007	0	0	3	0.72	0	0	seq=gene; coord=7:135109783..135114529:1;IPR002112:Transcription factor Jun	-	-	-	gi|242049836|ref|XP_002462662.1|/2.7141e-100/hypothetical protein SORBIDRAFT_02g029870 [Sorghum bicolor]	AC200057.4_FG007
GRMZM2G164489	267	63.93	162	38.79	65	15.56	seq=gene; coord=5:215443639..215447893:-1;IPR000116:High mobility group, HMG-I and HMG-Y;IPR017956:AT hook, DNA-binding, conserved site;IPR005175:Protein of unknown function DUF296;IPR000116:High mobility group, HMG-I and HMG-Y;IPR017956:AT hook, DNA-binding, conserved site;IPR005175:Protein of unknown function DUF296;	-	-	-	gi|194700836|gb|ACF84502.1|/4.26936e-154/unknown [Zea mays]	GRMZM2G164489
GRMZM2G472473	102	24.42	94	22.51	81	19.39	seq=gene; coord=1:34669059..34669492:-1	-	-	-	-	GRMZM2G472473
GRMZM2G169207	3	0.72	5	1.2	0	0	seq=gene; coord=4:72908498..72918142:1;IPR000644:Cystathionine beta-synthase, core;IPR000644:Cystathionine beta-synthase, core;	GO:0009536//plastid;GO:0009536//plastid	-	-	gi|195619856|gb|ACG31758.1|/3.07215e-71/IMP dehydrogenase [Zea mays]	GRMZM2G169207
GRMZM2G113391	35	8.38	37	8.86	48	11.49	seq=gene; coord=3:59485150..59494637:1;IPR011421:Bucentaur or craniofacial development;IPR011421:Bucentaur or craniofacial development;	-	-	-	gi|226491872|ref|NP_001148731.1|/2.73187e-14/craniofacial development protein 1 [Zea mays]	GRMZM2G113391
GRMZM2G087758	102	24.42	149	35.67	76	18.2	seq=gene; coord=6:144952296..144958671:1;IPR003095:Heat shock protein DnaJ;IPR003071:Orphan nuclear receptor, HMR type;IPR001623:Heat shock protein DnaJ, N-terminal;IPR001080:3Fe-4S ferredoxin;IPR001623:Heat shock protein DnaJ, N-terminal;	-	-	-	gi|226509476|ref|NP_001149610.1|/3.97309e-142/dnaJ domain containing protein [Zea mays]	GRMZM2G087758
GRMZM2G000719	0	0	0	0	1	0.24	seq=gene; coord=8:147484543..147489526:1;IPR001478:PDZ/DHR/GLGF;	-	-	-	gi|226492455|ref|NP_001147330.1|/1.09509e-172/carboxyl-terminal-processing protease [Zea mays]	GRMZM2G000719
GRMZM2G170805	75	17.96	75	17.96	51	12.21	seq=gene; coord=5:56810306..56813684:-1;IPR009288:AIG2-like;IPR009288:AIG2-like;	-	-	-	gi|226532132|ref|NP_001148626.1|/3.26989e-92/LOC100282242 [Zea mays]	GRMZM2G170805
GRMZM2G090744	1	0.24	8	1.92	4	0.96	seq=gene; coord=7:998346..1000946:1;IPR000533:Tropomyosin;IPR005448:Voltage-dependent calcium channel, P/Q-type, alpha-1 subunit;	-	-	-	gi|224030383|gb|ACN34267.1|/1.03298e-172/unknown [Zea mays]	GRMZM2G090744
GRMZM2G140451	568	136	503	120.43	688	164.72	seq=gene; coord=3:197796322..197799700:1;IPR000490:Glycoside hydrolase, family 17;IPR012946:X8;IPR017853:Glycoside hydrolase, catalytic core;	GO:0016023//cytoplasmic membrane-bounded vesicle	-	-	gi|223947963|gb|ACN28065.1|/0/unknown [Zea mays]	GRMZM2G140451
GRMZM2G166875	8	1.92	34	8.14	26	6.22	seq=gene; coord=8:161537807..161543020:-1	-	-	-	gi|226491392|ref|NP_001143110.1|/0/hypothetical protein LOC100275588 [Zea mays]	GRMZM2G166875
GRMZM2G024615	27	6.46	68	16.28	144	34.48	seq=gene; coord=7:74052538..74058237:1;IPR000326:Phosphatidic acid phosphatase type 2/haloperoxidase;IPR000326:Phosphatidic acid phosphatase type 2/haloperoxidase;IPR000326:Phosphatidic acid phosphatase type 2/haloperoxidase;IPR000326:Phosphatidic acid phosphatase type 2/haloperoxidase;IPR000326:Phosphatidic acid phosphatase type 2/haloperoxidase;	GO:0016020//membrane;GO:0016020//membrane;GO:0016020//membrane;GO:0016020//membrane;GO:0016020//membrane;GO:0016020//membrane	-	-	gi|226500530|ref|NP_001152212.1|/4.12901e-175/lipid phosphate phosphatase 3 [Zea mays]	GRMZM2G024615
GRMZM2G145204	4	0.96	1	0.24	0	0	seq=gene; coord=8:159761541..159763767:-1;IPR015798:Copper amine oxidase, C-terminal;	-	-	-	gi|226498518|ref|NP_001151884.1|/2.46224e-24/snRK1-interacting protein 1 [Zea mays]	GRMZM2G145204
GRMZM2G058531	65	15.56	97	23.22	96	22.98	seq=gene; coord=10:2710108..2713786:1;IPR000210:BTB/POZ-like;IPR011333:BTB/POZ fold;IPR000210:BTB/POZ-like;IPR011333:BTB/POZ fold;IPR004249:NPH3;IPR011333:BTB/POZ fold;IPR011333:BTB/POZ fold;IPR004249:NPH3;	-	-	-	gi|194705888|gb|ACF87028.1|/1.67602e-162/unknown [Zea mays]	GRMZM2G058531
GRMZM2G168119	119	28.49	151	36.15	151	36.15	seq=gene; coord=6:113490658..113493353:1;IPR008978:HSP20-like chaperone;IPR017447:CS;	-	-	-	gi|226500966|ref|NP_001141133.1|/4.39371e-150/hypothetical protein LOC100273219 [Zea mays]	GRMZM2G168119
GRMZM2G395120	3	0.72	0	0	4	0.96	seq=gene; coord=3:16267067..16268785:-1;IPR000245:ATPase, V0 complex, proteolipid subunit C;IPR011555:ATPase, V0 complex, proteolipid subunit C, eukaryotic;	GO:0033177//proton-transporting two-sector ATPase complex, proton-transporting domain;GO:0016023//cytoplasmic membrane-bounded vesicle	-	GO:0006811//ion transport	gi|125535913|gb|EAY82401.1|/1.35366e-27/hypothetical protein OsI_37615 [Oryza sativa Indica Group]	GRMZM2G395120
GRMZM2G414624	0	0	0	0	1	0.24	seq=gene; coord=6:167586439..167588162:1	-	-	-	gi|212275668|ref|NP_001130184.1|/2.67336e-54/hypothetical protein LOC100191278 [Zea mays]	GRMZM2G414624
GRMZM2G340130	27	6.46	39	9.34	106	25.38	seq=gene; coord=2:230726039..230731287:1;IPR002100:Transcription factor, MADS-box;	-	-	-	gi|226509834|ref|NP_001151572.1|/0/YT521-B-like family protein [Zea mays]	GRMZM2G340130
GRMZM2G041060	35	8.38	104	24.9	78	18.67	seq=gene; coord=4:241789790..241799602:-1;IPR000104:Antifreeze protein, type I;IPR000104:Antifreeze protein, type I;IPR000104:Antifreeze protein, type I;IPR001179:Peptidyl-prolyl cis-trans isomerase, FKBP-type;	GO:0009536//plastid;GO:0009536//plastid;GO:0009536//plastid	GO:0016853//isomerase activity;GO:0016853//isomerase activity	GO:0006457//protein folding;GO:0006457//protein folding	gi|226492247|ref|NP_001148684.1|/4.34038e-76/FK506 binding protein [Zea mays]	GRMZM2G041060
GRMZM2G129155	37	8.86	48	11.49	81	19.39	seq=gene; coord=3:159135120..159146145:1;IPR001401:Dynamin, GTPase region;IPR003130:Dynamin GTPase effector;IPR000375:Dynamin central region;IPR000375:Dynamin central region;IPR003130:Dynamin GTPase effector;	-	-	-	gi|255584037|ref|XP_002532763.1|/0/dynamin, putative [Ricinus communis]	GRMZM2G129155
GRMZM2G386643	62	14.84	259	62.01	341	81.64	seq=gene; coord=2:828844..833762:-1;IPR001565:Synaptotagmin;IPR000008:C2 calcium-dependent membrane targeting;IPR008973:C2 calcium/lipid-binding region, CaLB;IPR013583:Phosphoribosyltransferase C-terminal, plant;IPR001565:Synaptotagmin;IPR000008:C2 calcium-dependent membrane targeting;IPR008973:C2 calcium/lipid-binding region, CaLB;IPR013583:Phosphoribosyltransferase C-terminal, plant;	-	-	-	gi|293332419|ref|NP_001168012.1|/0/hypothetical protein LOC100381735 [Zea mays]	GRMZM2G386643
GRMZM2G049378	2	0.48	10	2.39	8	1.92	seq=gene; coord=8:147245397..147248081:-1;IPR001005:SANT, DNA-binding;IPR009057:Homeodomain-like;	-	-	-	gi|226529079|ref|NP_001148292.1|/3.05323e-46/SANT/MYB protein [Zea mays]	GRMZM2G049378
GRMZM2G008714	18	4.31	10	2.39	0	0	seq=gene; coord=10:147754740..147759198:1;IPR015793:Pyruvate kinase, barrel;IPR001697:Pyruvate kinase;IPR015813:Pyruvate/Phosphoenolpyruvate kinase, catalytic core;IPR015795:Pyruvate kinase, C-terminal-like;IPR015794:Pyruvate kinase, alpha/beta;IPR018209:Pyruvate kinase, active site;	-	-	-	gi|242077678|ref|XP_002448775.1|/0/hypothetical protein SORBIDRAFT_06g032940 [Sorghum bicolor]	GRMZM2G008714
GRMZM2G000823	17	4.07	26	6.22	20	4.79	seq=gene; coord=1:12105850..12106918:1;IPR000104:Antifreeze protein, type I;IPR014001:DEAD-like helicase, N-terminal;IPR011545:DNA/RNA helicase, DEAD/DEAH box type, N-terminal;	-	GO:0016787//hydrolase activity	-	gi|212720758|ref|NP_001132088.1|/9.00709e-110/hypothetical protein LOC100193503 [Zea mays]	GRMZM2G000823
GRMZM2G017159	295	70.63	264	63.21	374	89.54	seq=gene; coord=4:167649951..167652226:-1	-	-	-	gi|293333368|ref|NP_001169732.1|/0/hypothetical protein LOC100383613 [Zea mays]	GRMZM2G017159
GRMZM2G036534	91	21.79	132	31.6	148	35.43	seq=gene; coord=10:11822338..11828913:-1;IPR003016:2-oxo acid dehydrogenase, lipoyl-binding site;IPR000276:7TM GPCR, rhodopsin-like;IPR011053:Single hybrid motif;IPR004167:E3 binding;IPR000089:Biotin/lipoyl attachment;IPR001078:2-oxoacid dehydrogenase acyltransferase, catalytic domain;IPR000276:7TM GPCR, rhodopsin-like;IPR001078:2-oxoacid dehydrogenase acyltransferase, catalytic domain;	-	-	-	gi|226499350|ref|NP_001142314.1|/0/hypothetical protein LOC100274483 [Zea mays]	GRMZM2G036534
GRMZM2G132994	0	0	0	0	1	0.24	seq=gene; coord=10:124777628..124780851:1;IPR000909:Phospholipase C, phosphatidylinositol-specific , X region;IPR017946:PLC-like phosphodiesterase, TIM beta/alpha-barrel domain;IPR000909:Phospholipase C, phosphatidylinositol-specific , X region;IPR017946:PLC-like phosphodiesterase, TIM beta/alpha-barrel domain;	GO:0016023//cytoplasmic membrane-bounded vesicle;GO:0016023//cytoplasmic membrane-bounded vesicle	-	-	gi|223943995|gb|ACN26081.1|/1.50478e-128/unknown [Zea mays]	GRMZM2G132994
GRMZM2G180033	235	56.27	265	63.45	142	34	seq=gene; coord=4:220502958..220507371:1;IPR003617:Transcription elongation factor, TFIIS/CRSP70, N-terminal, sub-type;IPR010990:Transcription elongation factor, TFIIS/elongin A/CRSP70, N-terminal;IPR003617:Transcription elongation factor, TFIIS/CRSP70, N-terminal, sub-type;IPR010990:Transcription elongation factor, TFIIS/elongin A/CRSP70, N-terminal;	-	-	-	gi|226495529|ref|NP_001143974.1|/1.15801e-154/hypothetical protein LOC100276791 [Zea mays]	GRMZM2G180033
GRMZM2G063550	74	17.72	20	4.79	27	6.46	seq=gene; coord=9:17319324..17321520:-1;IPR002213:UDP-glucuronosyl/UDP-glucosyltransferase;	GO:0016023//cytoplasmic membrane-bounded vesicle	-	-	gi|226528369|ref|NP_001148983.1|/0/anthocyanidin 5,3-O-glucosyltransferase [Zea mays]	GRMZM2G063550
GRMZM2G037177	239	57.22	340	81.4	439	105.11	seq=gene; coord=7:164075357..164078373:1;IPR011004:Trimeric LpxA-like;IPR001451:Bacterial transferase hexapeptide repeat;	GO:0005739//mitochondrion	-	-	gi|293332983|ref|NP_001169012.1|/9.45068e-130/hypothetical protein LOC100382844 [Zea mays]	GRMZM2G037177
GRMZM2G054115	3	0.72	27	6.46	14	3.35	seq=gene; coord=3:200929069..200931949:-1;IPR013032:EGF-like region, conserved site;IPR015424:Pyridoxal phosphate-dependent transferase, major region;IPR006947:EGF-like, alliinase;IPR006948:Allinase, C-terminal;IPR013032:EGF-like region, conserved site;IPR006947:EGF-like, alliinase;IPR013032:EGF-like region, conserved site;IPR015424:Pyridoxal phosphate-dependent transferase, major region;IPR00694…	GO:0016023//cytoplasmic membrane-bounded vesicle;GO:0016023//cytoplasmic membrane-bounded vesicle;GO:0016023//cytoplasmic membrane-bounded vesicle;GO:0016023//cytoplasmic membrane-bounded vesicle;GO:0016023//cytoplasmic membrane-bounded vesicle	-	-	gi|226508094|ref|NP_001141015.1|/9.62771e-110/hypothetical protein LOC100273094 [Zea mays]	GRMZM2G054115
GRMZM2G377079	0	0	1	0.24	0	0	seq=gene; coord=3:99042614..99045033:1;IPR001965:Zinc finger, PHD-type;IPR011011:Zinc finger, FYVE/PHD-type;	-	-	-	gi|242085262|ref|XP_002443056.1|/3.68243e-102/hypothetical protein SORBIDRAFT_08g007190 [Sorghum bicolor]	GRMZM2G377079
GRMZM2G137421	2	0.48	9	2.15	4	0.96	seq=gene; coord=6:103696266..103703711:1;IPR016196:Major facilitator superfamily, general substrate transporter;IPR000109:TGF-beta receptor, type I/II extracellular region;	GO:0016020//membrane;GO:0016020//membrane	-	-	gi|226502044|ref|NP_001146274.1|/0/hypothetical protein LOC100279849 [Zea mays]	GRMZM2G137421
GRMZM2G050939	76	18.2	80	19.15	74	17.72	seq=gene; coord=6:18733868..18737683:-1;IPR007087:Zinc finger, C2H2-type;IPR015880:Zinc finger, C2H2-like;IPR015880:Zinc finger, C2H2-like;IPR007087:Zinc finger, C2H2-type;IPR007087:Zinc finger, C2H2-type;IPR015880:Zinc finger, C2H2-like;IPR007087:Zinc finger, C2H2-type;IPR015880:Zinc finger, C2H2-like;IPR007087:Zinc finger, C2H2-type;IPR015880:Zinc finger, C2H2-like;IPR007087:Zinc finger, C2H2-t…	-	-	-	gi|224029297|gb|ACN33724.1|/5.44984e-160/unknown [Zea mays]	GRMZM2G050939
GRMZM2G179693	12	2.87	77	18.44	38	9.1	seq=gene; coord=8:144808695..144812026:-1	GO:0005739//mitochondrion;GO:0005739//mitochondrion	-	-	gi|242058133|ref|XP_002458212.1|/3.48502e-108/hypothetical protein SORBIDRAFT_03g029040 [Sorghum bicolor]	GRMZM2G179693
GRMZM2G123544	139	33.28	91	21.79	180	43.1	seq=gene; coord=4:170064905..170068134:1;IPR000764:Uridine kinase;IPR003593:ATPase, AAA+ type, core;	-	-	-	gi|226528381|ref|NP_001145638.1|/0/hypothetical protein LOC100279125 [Zea mays]	GRMZM2G123544
GRMZM2G013908	21	5.03	98	23.46	178	42.62	seq=gene; coord=9:137694540..137700472:-1;IPR004823:TATA box binding protein associated factor (TAF);IPR009072:Histone-fold;IPR016024:Armadillo-type fold;IPR011442:Protein of unknown function DUF1546;IPR016024:Armadillo-type fold;IPR011442:Protein of unknown function DUF1546;IPR004823:TATA box binding protein associated factor (TAF);IPR009072:Histone-fold;IPR016024:Armadillo-type fold;IPR011442:P…	GO:0005634//nucleus	GO:0003702//RNA polymerase II transcription factor activity;GO:0016986//transcription initiation factor activity	GO:0006352//transcription initiation;GO:0051090//regulation of transcription factor activity	gi|219887973|gb|ACL54361.1|/0/unknown [Zea mays]	GRMZM2G013908
GRMZM2G113596	39	9.34	113	27.05	87	20.83	seq=gene; coord=5:173638761..173640170:-1;IPR002110:Ankyrin;	-	-	-	gi|224029233|gb|ACN33692.1|/1.50817e-138/unknown [Zea mays]	GRMZM2G113596
GRMZM2G094712	224	53.63	249	59.61	368	88.11	seq=gene; coord=3:193562124..193568282:-1;IPR000796:Aspartate/other aminotransferase;IPR015424:Pyridoxal phosphate-dependent transferase, major region;IPR004839:Aminotransferase, class I and II;IPR004838:Aminotransferases, class-I, pyridoxal-phosphate-binding site;IPR000796:Aspartate/other aminotransferase;IPR015424:Pyridoxal phosphate-dependent transferase, major region;IPR004839:Aminotransferas…	-	GO:0030170//pyridoxal phosphate binding;GO:0004069//L-aspartate:2-oxoglutarate aminotransferase activity;GO:0030170//pyridoxal phosphate binding;GO:0004069//L-aspartate:2-oxoglutarate aminotransferase activity;GO:0030170//pyridoxal phosphate binding;GO:0004069//L-aspartate:2-oxoglutarate aminotransferase activity;GO:0030170//pyridoxal phosphate binding;GO:0004069//L-aspartate:2-oxoglutarate amino…	GO:0006520//cellular amino acid metabolic process;GO:0009058//biosynthetic process;GO:0006520//cellular amino acid metabolic process;GO:0009058//biosynthetic process;GO:0006520//cellular amino acid metabolic process;GO:0009058//biosynthetic process;GO:0006520//cellular amino acid metabolic process;GO:0009058//biosynthetic process;GO:0006520//cellular amino acid metabolic process;GO:0009058//biosy…	gi|226496407|ref|NP_001141224.1|/2.12257e-37/hypothetical protein LOC100273311 [Zea mays]	GRMZM2G094712
GRMZM2G703296	212	50.76	91	21.79	309	73.98	seq=gene; coord=2:185910840..185914613:-1	GO:0005739//mitochondrion;GO:0005739//mitochondrion	-	-	gi|226530765|ref|NP_001144290.1|/4.78088e-59/hypothetical protein LOC100277172 [Zea mays]	GRMZM2G703296
GRMZM2G472945	56	13.41	114	27.29	172	41.18	seq=gene; coord=5:90044424..90047024:-1;IPR000007:Tubby, C-terminal;IPR017987:Wilm's tumour protein region, bacterial;IPR000104:Antifreeze protein, type I;IPR000007:Tubby, C-terminal;IPR017987:Wilm's tumour protein region, bacterial;IPR000104:Antifreeze protein, type I;	-	-	-	gi|238008370|gb|ACR35220.1|/0/unknown [Zea mays]	GRMZM2G472945
GRMZM2G700375	0	0	1	0.24	0	0	seq=gene; coord=8:9044021..9045002:1	-	-	-	-	GRMZM2G700375
GRMZM2G438673	18	4.31	22	5.27	35	8.38	seq=gene; coord=8:155163078..155168168:1;IPR004033:UbiE/COQ5 methyltransferase;IPR013216:Methyltransferase type 11;IPR013217:Methyltransferase type 12;IPR004033:UbiE/COQ5 methyltransferase;IPR013216:Methyltransferase type 11;IPR013217:Methyltransferase type 12;	GO:0005739//mitochondrion;GO:0005739//mitochondrion	-	-	gi|226529570|ref|NP_001151844.1|/1.31525e-142/ubiquinone biosynthesis methyltransferase COQ5 [Zea mays]	GRMZM2G438673
GRMZM2G051852	0	0	1	0.24	0	0	seq=gene; coord=10:125387603..125389557:-1;IPR003072:Orphan nuclear receptor, NOR1 type;IPR000104:Antifreeze protein, type I;IPR000009:Protein phosphatase 2A, regulatory subunit PR55;IPR011046:WD40 repeat-like;IPR001680:WD40 repeat;	-	-	-	gi|242076246|ref|XP_002448059.1|/3.88139e-130/hypothetical protein SORBIDRAFT_06g020340 [Sorghum bicolor]	GRMZM2G051852
GRMZM2G471698	1	0.24	0	0	13	3.11	seq=gene; coord=3:157756048..157757577:-1;IPR002100:Transcription factor, MADS-box;	GO:0005634//nucleus;GO:0005739//mitochondrion	GO:0003700//transcription factor activity	GO:0006355//regulation of transcription, DNA-dependent	gi|195623930|gb|ACG33795.1|/9.19169e-27/MADS-box transcription factor 8 [Zea mays]	GRMZM2G471698
GRMZM2G046966	188	45.01	53	12.69	20	4.79	seq=gene; coord=1:268083421..268087558:-1;IPR006220:Anthranilate synthase component II/delta crystallin;IPR011702:Glutamine amidotransferase superfamily;IPR000991:Glutamine amidotransferase class-I, C-terminal;IPR006220:Anthranilate synthase component II/delta crystallin;IPR011702:Glutamine amidotransferase superfamily;IPR000991:Glutamine amidotransferase class-I, C-terminal;	GO:0009536//plastid;GO:0009536//plastid;GO:0009536//plastid	GO:0004049//anthranilate synthase activity	GO:0008152//metabolic process;GO:0006541//glutamine metabolic process;GO:0009058//biosynthetic process;GO:0008152//metabolic process	gi|242033181|ref|XP_002463985.1|/1.57673e-131/hypothetical protein SORBIDRAFT_01g010040 [Sorghum bicolor]	GRMZM2G046966
GRMZM2G015875	289	69.19	325	77.81	442	105.82	seq=gene; coord=4:160161349..160168047:-1;IPR000533:Tropomyosin;IPR000533:Tropomyosin;	-	-	-	gi|125540853|gb|EAY87248.1|/0/hypothetical protein OsI_08650 [Oryza sativa Indica Group]	GRMZM2G015875
GRMZM2G114380	5	1.2	0	0	25	5.99	seq=gene; coord=3:216940436..216943171:1	-	-	-	gi|195643614|gb|ACG41275.1|/1.49116e-88/hypothetical protein [Zea mays]	GRMZM2G114380
GRMZM2G430646	6	1.44	1	0.24	6	1.44	seq=gene; coord=8:91740465..91741975:-1	-	-	-	gi|212720735|ref|NP_001132378.1|/6.79362e-62/hypothetical protein LOC100193824 [Zea mays]	GRMZM2G430646
GRMZM2G119640	128	30.65	431	103.19	336	80.45	seq=gene; coord=4:242501782..242508394:-1;IPR000571:Zinc finger, CCCH-type;IPR000571:Zinc finger, CCCH-type;IPR000571:Zinc finger, CCCH-type;IPR000571:Zinc finger, CCCH-type;	-	-	-	gi|194702322|gb|ACF85245.1|/4.27753e-170/unknown [Zea mays]	GRMZM2G119640
GRMZM2G046070	146	34.96	42	10.06	109	26.1	seq=gene; coord=2:10443794..10448038:-1;IPR002328:Alcohol dehydrogenase, zinc-containing, conserved site;IPR011032:GroES-like;IPR013154:Alcohol dehydrogenase GroES-like;IPR013149:Alcohol dehydrogenase, zinc-binding;IPR013027:FAD-dependent pyridine nucleotide-disulphide oxidoreductase;IPR016040:NAD(P)-binding;IPR013149:Alcohol dehydrogenase, zinc-binding;IPR011032:GroES-like;IPR013154:Alcohol dehy…	-	-	-	gi|212274473|ref|NP_001130781.1|/5.01307e-173/hypothetical protein LOC100191885 [Zea mays]	GRMZM2G046070
GRMZM2G139878	2	0.48	3	0.72	15	3.59	seq=gene; coord=1:69568911..69571089:-1;IPR001368:TNFR/CD27/30/40/95 cysteine-rich region;	-	-	-	gi|268321220|gb|ACZ02400.1|/1.36869e-45/GS3-like protein [Zea mays]	GRMZM2G139878
GRMZM2G153359	0	0	0	0	1	0.24	seq=gene; coord=5:186319253..186323140:-1;IPR002283:Isopenicillin N synthase;IPR005123:2OG-Fe(II) oxygenase;	-	-	-	gi|218191217|gb|EEC73644.1|/9.7672e-143/hypothetical protein OsI_08165 [Oryza sativa Indica Group]	GRMZM2G153359
GRMZM2G163473	173	41.42	82	19.63	491	117.56	seq=gene; coord=8:162886420..162891533:-1	GO:0005739//mitochondrion;GO:0005739//mitochondrion	-	-	gi|223945517|gb|ACN26842.1|/3.86196e-96/unknown [Zea mays]	GRMZM2G163473
GRMZM2G044251	13	3.11	12	2.87	14	3.35	seq=gene; coord=5:207246730..207250114:1	-	-	-	gi|238008576|gb|ACR35323.1|/1.48345e-22/unknown [Zea mays]	GRMZM2G044251
GRMZM2G028218	1	0.24	10	2.39	6	1.44	seq=gene; coord=5:4673763..4677719:-1;IPR003095:Heat shock protein DnaJ;IPR018253:Heat shock protein DnaJ, conserved site;IPR001623:Heat shock protein DnaJ, N-terminal;IPR008971:HSP40/DnaJ peptide-binding;IPR001305:Heat shock protein DnaJ, cysteine-rich region;IPR002939:Chaperone DnaJ, C-terminal;IPR003095:Heat shock protein DnaJ;IPR001623:Heat shock protein DnaJ, N-terminal;IPR008971:HSP40/DnaJ …	-	-	-	gi|293333670|ref|NP_001168650.1|/0/hypothetical protein LOC100382437 [Zea mays]	GRMZM2G028218
GRMZM2G422641	13	3.11	10	2.39	3	0.72	seq=gene; coord=8:116030288..116033183:1;IPR010978:tRNA-binding arm;IPR011684:KIP1-like;	GO:0005739//mitochondrion	-	-	gi|242090813|ref|XP_002441239.1|/0/hypothetical protein SORBIDRAFT_09g022910 [Sorghum bicolor]	GRMZM2G422641
GRMZM2G162109	21	5.03	16	3.83	40	9.58	seq=gene; coord=8:117014890..117016299:1;IPR000104:Antifreeze protein, type I;IPR006936:Protein of unknown function DUF640;	-	-	-	gi|239835738|ref|NP_001155193.1|/1.29985e-65/hypothetical protein LOC100273939 [Zea mays]	GRMZM2G162109
GRMZM2G172795	16	3.83	14	3.35	41	9.82	seq=gene; coord=2:18337716..18342173:1;IPR001092:Basic helix-loop-helix dimerisation region bHLH;IPR011598:Helix-loop-helix DNA-binding;	GO:0005634//nucleus	GO:0030528//transcription regulator activity	GO:0045449//regulation of transcription	gi|18568238|gb|AAL75975.1|AF466203_4/0/regulatory protein [Zea mays]	GRMZM2G172795
GRMZM2G035688	12	2.87	5	1.2	9	2.15	seq=gene; coord=2:27399818..27404797:-1;IPR001789:Signal transduction response regulator, receiver region;IPR011006:CheY-like;IPR011006:CheY-like;IPR001789:Signal transduction response regulator, receiver region;	-	GO:0000156//two-component response regulator activity;GO:0000156//two-component response regulator activity	GO:0000160//two-component signal transduction system (phosphorelay);GO:0009735//response to cytokinin stimulus;GO:0006355//regulation of transcription, DNA-dependent;GO:0000160//two-component signal transduction system (phosphorelay);GO:0009735//response to cytokinin stimulus;GO:0006355//regulation of transcription, DNA-dependent	gi|162458935|ref|NP_001104854.1|/8.82195e-70/response regulator [Zea mays]	GRMZM2G035688
GRMZM2G016296	259	62.01	87	20.83	197	47.17	seq=gene; coord=4:202872621..202881040:-1;IPR000504:RNA recognition motif, RNP-1;IPR003954:RNA recognition, region 1;IPR003954:RNA recognition, region 1;IPR000504:RNA recognition motif, RNP-1;IPR000504:RNA recognition motif, RNP-1;IPR003954:RNA recognition, region 1;IPR003954:RNA recognition, region 1;IPR000504:RNA recognition motif, RNP-1;IPR000504:RNA recognition motif, RNP-1;IPR003954:RNA reco…	-	-	-	gi|238006960|gb|ACR34515.1|/9.93711e-60/unknown [Zea mays]	GRMZM2G016296
GRMZM2G093139	148	35.44	6	1.44	19	4.55	seq=gene; coord=5:9963753..9966295:1;IPR009291:Protein of unknown function DUF946, plant;	-	-	-	gi|238015422|gb|ACR38746.1|/0/unknown [Zea mays]	GRMZM2G093139
GRMZM2G067646	21	5.03	24	5.75	19	4.55	seq=gene; coord=9:12862691..12864448:-1;IPR006735:Protein of unknown function DUF602;	-	-	-	gi|242094952|ref|XP_002437966.1|/4.02509e-139/hypothetical protein SORBIDRAFT_10g005640 [Sorghum bicolor]	GRMZM2G067646
GRMZM2G074871	43	10.3	100	23.94	88	21.07	seq=gene; coord=5:19030778..19032985:-1;IPR002401:Cytochrome P450, E-class, group I;IPR002403:Cytochrome P450, E-class, group IV;IPR017973:Cytochrome P450, C-terminal region;IPR002397:Cytochrome P450, B-class;IPR017972:Cytochrome P450, conserved site;IPR001128:Cytochrome P450;	GO:0016023//cytoplasmic membrane-bounded vesicle	-	-	gi|242038919|ref|XP_002466854.1|/0/hypothetical protein SORBIDRAFT_01g015300 [Sorghum bicolor]	GRMZM2G074871
GRMZM2G039089	104	24.9	268	64.16	139	33.28	seq=gene; coord=5:168923402..168926484:1;IPR003095:Heat shock protein DnaJ;IPR001305:Heat shock protein DnaJ, cysteine-rich region;IPR003095:Heat shock protein DnaJ;IPR001305:Heat shock protein DnaJ, cysteine-rich region;	GO:0009536//plastid;GO:0009536//plastid;GO:0009536//plastid;GO:0005739//mitochondrion;GO:0009536//plastid	-	GO:0009987//cellular process;GO:0009987//cellular process;GO:0009987//cellular process	gi|226530323|ref|NP_001143286.1|/1.17533e-165/hypothetical protein LOC100275820 [Zea mays]	GRMZM2G039089
GRMZM2G079774	13	3.11	34	8.14	31	7.42	seq=gene; coord=1:107495610..107501695:1;IPR013845:Ribosomal protein S4e, central;	-	-	-	gi|293336359|ref|NP_001169550.1|/9.27861e-78/hypothetical protein LOC100383428 [Zea mays]	GRMZM2G079774
GRMZM2G034623	1	0.24	2	0.48	1	0.24	seq=gene; coord=9:66111680..66112551:1	-	-	-	gi|226493043|ref|NP_001143344.1|/2.01826e-51/hypothetical protein LOC100275953 [Zea mays]	GRMZM2G034623
GRMZM2G025703	1	0.24	14	3.35	15	3.59	seq=gene; coord=3:169359544..169363169:-1;IPR001965:Zinc finger, PHD-type;IPR001841:Zinc finger, RING-type;IPR011011:Zinc finger, FYVE/PHD-type;IPR001965:Zinc finger, PHD-type;IPR001841:Zinc finger, RING-type;IPR011011:Zinc finger, FYVE/PHD-type;	-	-	-	gi|293334211|ref|NP_001167999.1|/4.12325e-93/hypothetical protein LOC100381720 [Zea mays]	GRMZM2G025703
GRMZM2G107111	16	3.83	44	10.53	48	11.49	seq=gene; coord=3:224931691..224935904:-1;IPR001683:Phox-like;IPR001781:Zinc finger, LIM-type;IPR002219:Protein kinase C, phorbol ester/diacylglycerol binding;IPR001683:Phox-like;IPR001781:Zinc finger, LIM-type;IPR002219:Protein kinase C, phorbol ester/diacylglycerol binding;	-	-	-	gi|238013290|gb|ACR37680.1|/0/unknown [Zea mays]	GRMZM2G107111
GRMZM2G363437	5	1.2	12	2.87	0	0	seq=gene; coord=5:18520527..18523142:-1;IPR014400:Cyclin, A/B/D/E;IPR006671:Cyclin, N-terminal;IPR004367:Cyclin, C-terminal;IPR011028:Cyclin-like;IPR006670:Cyclin;IPR006671:Cyclin, N-terminal;IPR006670:Cyclin;IPR014400:Cyclin, A/B/D/E;IPR011028:Cyclin-like;IPR004367:Cyclin, C-terminal;	GO:0009536//plastid	-	-	gi|219362583|ref|NP_001136529.1|/2.62819e-172/hypothetical protein LOC100216646 [Zea mays]	GRMZM2G363437
GRMZM2G416817	45	10.77	6	1.44	6	1.44	seq=gene; coord=8:5482753..5486913:-1;IPR002921:Lipase, class 3;	-	-	-	gi|293333732|ref|NP_001169446.1|/0/hypothetical protein LOC100383317 [Zea mays]	GRMZM2G416817
GRMZM2G031435	27	6.46	3	0.72	164	39.26	seq=gene; coord=6:160241109..160245102:1;IPR016130:Protein-tyrosine phosphatase, active site;IPR000340:Protein-tyrosine phosphatase, dual specificity;IPR003595:Protein-tyrosine phosphatase, catalytic;	-	GO:0004725//protein tyrosine phosphatase activity;GO:0008138//protein tyrosine/serine/threonine phosphatase activity	GO:0006470//protein amino acid dephosphorylation	gi|195624312|gb|ACG33986.1|/0/dual-specificity protein-like phosphatase 4 [Zea mays]	GRMZM2G031435
GRMZM2G086294	0	0	0	0	4	0.96	seq=gene; coord=6:36981059..36982098:-1;IPR016140:Bifunctional inhibitor/plant lipid transfer protein/seed storage;	-	-	-	gi|195606136|gb|ACG24898.1|/3.3593e-46/prolamin PPROL 17 precursor [Zea mays]	GRMZM2G086294
GRMZM2G009223	0	0	7	1.68	7	1.68	seq=gene; coord=7:148176137..148178596:-1;IPR004696:Tpt phosphate/phosphoenolpyruvate translocator;IPR013657:UAA transporter;IPR000620:Protein of unknown function DUF6, transmembrane;IPR004853:Protein of unknown function DUF250;	GO:0016021//integral to membrane;GO:0009536//plastid	GO:0005215//transporter activity	GO:0006810//transport	gi|239985497|ref|NP_001147439.1|/1.20374e-174/glucose-6-phosphate/phosphate translocator 2 [Zea mays]	GRMZM2G009223
GRMZM2G105770	95	22.75	463	110.85	455	108.94	seq=gene; coord=1:223315768..223329863:1;IPR001752:Kinesin, motor region;IPR000533:Tropomyosin;IPR004082:Protein of unknown function DUF1423, plant;IPR011016:Zinc finger, RING-CH-type;IPR001841:Zinc finger, RING-type;IPR001752:Kinesin, motor region;IPR000533:Tropomyosin;IPR004082:Protein of unknown function DUF1423, plant;IPR011016:Zinc finger, RING-CH-type;IPR001841:Zinc finger, RING-type;	-	-	-	gi|110289398|gb|AAP54589.2|/0/Kinesin heavy chain, putative, expressed [Oryza sativa (japonica cultivar-group)]	GRMZM2G105770
GRMZM2G155043	1	0.24	0	0	4	0.96	seq=gene; coord=1:256836450..256843916:-1;IPR011598:Helix-loop-helix DNA-binding;IPR001092:Basic helix-loop-helix dimerisation region bHLH;	-	-	-	gi|242038587|ref|XP_002466688.1|/9.11302e-94/hypothetical protein SORBIDRAFT_01g012280 [Sorghum bicolor]	GRMZM2G155043
GRMZM2G319104	2	0.48	1	0.24	2	0.48	seq=gene; coord=6:38941201..38953724:1;IPR013194:Histone deacetylase interacting;IPR003822:Paired amphipathic helix;	-	-	-	gi|242089117|ref|XP_002440391.1|/0/hypothetical protein SORBIDRAFT_09g000200 [Sorghum bicolor]	GRMZM2G319104
GRMZM2G388148	4	0.96	13	3.11	10	2.39	seq=gene; coord=5:133460606..133476373:1;IPR000276:7TM GPCR, rhodopsin-like;IPR005172:Tesmin/TSO1-like, CXC;IPR000276:7TM GPCR, rhodopsin-like;IPR005172:Tesmin/TSO1-like, CXC;	-	-	-	gi|259489914|ref|NP_001159253.1|/0/hypothetical protein LOC100304343 [Zea mays]	GRMZM2G388148
GRMZM2G024260	0	0	33	7.9	2	0.48	seq=gene; coord=5:136825930..136838752:-1;IPR012795:Lysidine-tRNA(Ile) synthetase, N-terminal;IPR011063:PP-loop;	-	-	-	gi|222622571|gb|EEE56703.1|/7.22181e-103/hypothetical protein OsJ_06178 [Oryza sativa Japonica Group]	GRMZM2G024260
AC203280.3_FG001	0	0	0	0	1	0.24	seq=gene; coord=1:118833272..118834502:1;IPR000504:RNA recognition motif, RNP-1	GO:0009536//plastid	-	-	gi|293334341|ref|NP_001168036.1|/1.61174e-20/hypothetical protein LOC100381763 [Zea mays]	AC203280.3_FG001
GRMZM2G170934	212	50.76	740	177.17	1279	306.22	seq=gene; coord=2:230659046..230663141:1;IPR012474:Frigida-like;	-	-	-	gi|242047558|ref|XP_002461525.1|/2.58302e-166/hypothetical protein SORBIDRAFT_02g004090 [Sorghum bicolor]	GRMZM2G170934
GRMZM2G116086	290	69.43	404	96.72	489	117.08	seq=gene; coord=8:171307638..171316816:1;IPR011009:Protein kinase-like;IPR017441:Protein kinase, ATP binding site;IPR008271:Serine/threonine protein kinase, active site;IPR001245:Tyrosine protein kinase;IPR002290:Serine/threonine protein kinase;	-	GO:0005524//ATP binding;GO:0004674//protein serine/threonine kinase activity	GO:0006468//protein amino acid phosphorylation	gi|115440227|ref|NP_001044393.1|/0/Os01g0772600 [Oryza sativa (japonica cultivar-group)]	GRMZM2G116086
GRMZM2G042516	71	17	19	4.55	3	0.72	seq=gene; coord=8:100661988..100663455:1;IPR002925:Dienelactone hydrolase;IPR002925:Dienelactone hydrolase;	-	-	-	gi|242090631|ref|XP_002441148.1|/1.45807e-132/hypothetical protein SORBIDRAFT_09g021250 [Sorghum bicolor]	GRMZM2G042516
GRMZM2G027797	2	0.48	3	0.72	5	1.2	seq=gene; coord=1:263053835..263058726:-1;IPR017972:Cytochrome P450, conserved site;IPR001680:WD40 repeat;IPR011046:WD40 repeat-like;IPR011046:WD40 repeat-like;IPR001680:WD40 repeat;IPR017972:Cytochrome P450, conserved site;	-	GO:0005515//protein binding;GO:0005515//protein binding	GO:0044238//primary metabolic process;GO:0034960;GO:0065007//biological regulation;GO:0044238//primary metabolic process;GO:0034960;GO:0065007//biological regulation	gi|226506224|ref|NP_001151241.1|/0/LOC100284874 [Zea mays]	GRMZM2G027797
GRMZM2G149979	52	12.45	85	20.35	136	32.56	seq=gene; coord=10:147110871..147117598:1;IPR009060:UBA-like;IPR006577:UAS;IPR009060:UBA-like;IPR012336:Thioredoxin-like fold;IPR003903:Ubiquitin interacting motif;IPR001012:UBX;	-	-	-	gi|293336800|ref|NP_001170636.1|/0/hypothetical protein LOC100384688 [Zea mays]	GRMZM2G149979
GRMZM2G131638	103	24.66	169	40.46	130	31.12	seq=gene; coord=5:89146469..89151317:-1;IPR001680:WD40 repeat;IPR011046:WD40 repeat-like;	-	-	-	gi|242064218|ref|XP_002453398.1|/0/hypothetical protein SORBIDRAFT_04g005290 [Sorghum bicolor]	GRMZM2G131638
GRMZM2G064590	3	0.72	0	0	2	0.48	seq=gene; coord=1:240776956..240784148:1	-	-	-	gi|223975539|gb|ACN31957.1|/4.77352e-177/unknown [Zea mays]	GRMZM2G064590
GRMZM2G050882	2	0.48	3	0.72	4	0.96	seq=gene; coord=10:129695563..129709442:-1;IPR014001:DEAD-like helicase, N-terminal;IPR006935:Restriction endonuclease, type I, R subunit/Type III, Res subunit;IPR011545:DNA/RNA helicase, DEAD/DEAH box type, N-terminal;	-	-	-	gi|157279689|dbj|BAF80150.1|/1.08165e-106/SHOOT ORGANIZATION1 [Oryza sativa Japonica Group]	GRMZM2G050882
GRMZM2G415613	0	0	33	7.9	24	5.75	seq=gene; coord=4:154132253..154133430:1	-	-	-	gi|195646748|gb|ACG42842.1|/2.01492e-21/hypothetical protein [Zea mays]	GRMZM2G415613
GRMZM2G088737	78	18.68	94	22.51	81	19.39	seq=gene; coord=5:62625196..62629282:-1;IPR005178:Protein of unknown function DUF300;	GO:0016023//cytoplasmic membrane-bounded vesicle	-	-	gi|242097140|ref|XP_002439060.1|/0/hypothetical protein SORBIDRAFT_10g030780 [Sorghum bicolor]	GRMZM2G088737
GRMZM2G465213	6	1.44	2	0.48	7	1.68	seq=gene; coord=9:131089829..131093847:1	-	-	-	gi|242035969|ref|XP_002465379.1|/1.31447e-175/hypothetical protein SORBIDRAFT_01g037540 [Sorghum bicolor]	GRMZM2G465213
GRMZM2G077389	0	0	0	0	1	0.24	seq=gene; coord=5:7721024..7726819:-1;IPR002241:Glycoside hydrolase, family 27;IPR017853:Glycoside hydrolase, catalytic core;	GO:0016023//cytoplasmic membrane-bounded vesicle	-	-	gi|226529467|ref|NP_001147362.1|/4.88227e-19/alpha-galactosidase [Zea mays]	GRMZM2G077389
GRMZM2G306981	57	13.65	7	1.68	3	0.72	seq=gene; coord=10:122068063..122079556:-1;IPR001650:DNA/RNA helicase, C-terminal;IPR014001:DEAD-like helicase, N-terminal;	-	-	-	gi|226500860|ref|NP_001151526.1|/0/ATP-dependent RNA helicase SUV3 [Zea mays]	GRMZM2G306981
AC191264.3_FG002	1	0.24	3	0.72	5	1.2	seq=gene; coord=7:144548540..144551110:1	-	-	-	gi|255670729|dbj|BAF08237.2|/1.60383e-09/Os02g0221600 [Oryza sativa Japonica Group]	AC191264.3_FG002
GRMZM2G041493	6	1.44	0	0	0	0	seq=gene; coord=2:114640521..114641683:-1;IPR003980:Histamine H3 receptor;IPR003980:Histamine H3 receptor;	GO:0005739//mitochondrion	-	-	gi|108709406|gb|ABF97201.1|/8.12649e-20/retrotransposon protein, putative, unclassified [Oryza sativa (japonica cultivar-group)]	GRMZM2G041493
GRMZM2G052034	7	1.68	1	0.24	18	4.31	seq=gene; coord=1:59642011..59645172:-1;IPR008913:Zinc finger, CHY-type;IPR001841:Zinc finger, RING-type;IPR003731:Dinitrogenase iron-molybdenum cofactor biosynthesis;IPR008913:Zinc finger, CHY-type;	-	-	-	gi|226508256|ref|NP_001140779.1|/3.80928e-162/hypothetical protein LOC100272854 [Zea mays]	GRMZM2G052034
AC209784.3_FG007	10	2.39	0	0	0	0	seq=gene; coord=3:179348763..179351949:-1;IPR001023:Heat shock protein Hsp70	-	-	-	gi|242054931|ref|XP_002456611.1|/0/hypothetical protein SORBIDRAFT_03g039360 [Sorghum bicolor]	AC209784.3_FG007
GRMZM2G469920	3	0.72	1	0.24	1	0.24	seq=gene; coord=5:164743600..164745353:-1;IPR000104:Antifreeze protein, type I;	-	-	-	gi|226495801|ref|NP_001149975.1|/7.23264e-55/major ampullate spidroin 2-2 [Zea mays]	GRMZM2G469920
GRMZM2G118637	2354	563.61	1132	271.02	154	36.87	seq=gene; coord=4:242470006..242473191:1;IPR000626:Ubiquitin;IPR000626:Ubiquitin;IPR000626:Ubiquitin;IPR000626:Ubiquitin;IPR000626:Ubiquitin;	-	-	GO:0006464//protein modification process;GO:0006464//protein modification process;GO:0006464//protein modification process;GO:0006464//protein modification process	gi|226502871|ref|NP_001148453.1|/0/polyubiquitin containing 7 ubiquitin monomers [Zea mays]	GRMZM2G118637
GRMZM2G020016	3	0.72	2	0.48	1	0.24	seq=gene; coord=6:156532525..156534340:-1;IPR001471:Pathogenesis-related transcriptional factor and ERF, DNA-binding;IPR016177:DNA-binding, integrase-type;IPR001412:Aminoacyl-tRNA synthetase, class I, conserved site;	-	-	-	gi|226504294|ref|NP_001141110.1|/3.62535e-58/hypothetical protein LOC100273194 [Zea mays]	GRMZM2G020016
GRMZM2G466044	1	0.24	12	2.87	1	0.24	seq=gene; coord=5:190706014..190707543:-1;IPR001471:Pathogenesis-related transcriptional factor and ERF, DNA-binding;IPR000104:Antifreeze protein, type I;IPR016177:DNA-binding, integrase-type;	-	-	-	gi|242063056|ref|XP_002452817.1|/4.20168e-73/hypothetical protein SORBIDRAFT_04g033105 [Sorghum bicolor]	GRMZM2G466044
GRMZM2G078906	0	0	41	9.82	0	0	seq=gene; coord=10:77874418..77876168:1	-	-	-	gi|28812074|dbj|BAC65012.1|/2.31714e-179/putative berberine bridge enzyme [Oryza sativa Japonica Group]	GRMZM2G078906
GRMZM2G117999	8	1.92	1	0.24	3	0.72	seq=gene; coord=9:113744259..113748072:1;IPR004963:Pectinacetylesterase;IPR004963:Pectinacetylesterase;IPR004963:Pectinacetylesterase;IPR004963:Pectinacetylesterase;	-	-	-	gi|224030703|gb|ACN34427.1|/0/unknown [Zea mays]	GRMZM2G117999
GRMZM2G105307	244	58.42	195	46.69	68	16.28	seq=gene; coord=3:181511715..181516062:1;IPR007529:Zinc finger, HIT-type;IPR000315:Zinc finger, B-box;IPR007529:Zinc finger, HIT-type;	-	-	-	gi|194702250|gb|ACF85209.1|/2.46346e-16/unknown [Zea mays]	GRMZM2G105307
GRMZM2G017145	29	6.94	20	4.79	47	11.25	seq=gene; coord=7:161776845..161784069:-1	GO:0005634//nucleus;GO:0005634//nucleus;GO:0005634//nucleus;GO:0005634//nucleus;GO:0005634//nucleus	GO:0030528//transcription regulator activity;GO:0030528//transcription regulator activity;GO:0030528//transcription regulator activity;GO:0030528//transcription regulator activity;GO:0030528//transcription regulator activity	GO:0045449//regulation of transcription;GO:0045449//regulation of transcription;GO:0045449//regulation of transcription;GO:0045449//regulation of transcription;GO:0045449//regulation of transcription	gi|226503781|ref|NP_001149147.1|/2.66281e-117/amelogenin precursor like protein [Zea mays]	GRMZM2G017145
GRMZM2G016232	0	0	1813	434.06	0	0	seq=gene; coord=3:13711696..13713318:-1;IPR001951:Histone H4;IPR004823:TATA box binding protein associated factor (TAF);IPR009072:Histone-fold;IPR007125:Histone core;IPR001951:Histone H4;IPR004823:TATA box binding protein associated factor (TAF);IPR009072:Histone-fold;IPR007125:Histone core;IPR001951:Histone H4;IPR009072:Histone-fold;IPR001951:Histone H4;IPR004823:TATA box binding protein associa…	GO:0000786//nucleosome;GO:0005634//nucleus;GO:0000786//nucleosome;GO:0005634//nucleus;GO:0000786//nucleosome;GO:0005634//nucleus;GO:0000786//nucleosome;GO:0005634//nucleus	GO:0003677//DNA binding;GO:0003677//DNA binding;GO:0003677//DNA binding;GO:0003677//DNA binding	GO:0006334//nucleosome assembly;GO:0006334//nucleosome assembly;GO:0006334//nucleosome assembly;GO:0006334//nucleosome assembly	gi|115472675|ref|NP_001059936.1|/1.02505e-40/Os07g0549900 [Oryza sativa (japonica cultivar-group)]	GRMZM2G016232
GRMZM2G021877	318	76.14	186	44.53	142	34	seq=gene; coord=8:68732372..68734290:1	GO:0016023//cytoplasmic membrane-bounded vesicle	-	-	gi|226532892|ref|NP_001148379.1|/5.10045e-59/60S ribosomal protein L18A [Zea mays]	GRMZM2G021877
GRMZM2G116271	1	0.24	0	0	0	0	seq=gene; coord=3:200465053..200467794:1;IPR003593:ATPase, AAA+ type, core;IPR002182:NB-ARC;	-	-	-	gi|242054233|ref|XP_002456262.1|/0/hypothetical protein SORBIDRAFT_03g033130 [Sorghum bicolor]	GRMZM2G116271
GRMZM2G096486	13	3.11	12	2.87	1	0.24	seq=gene; coord=1:288367767..288371447:1;IPR001388:Synaptobrevin;IPR011012:Longin-like;	-	-	-	gi|226503057|ref|NP_001149329.1|/2.31183e-111/vesicle-associated membrane protein 725 [Zea mays]	GRMZM2G096486
GRMZM2G470499	1	0.24	0	0	0	0	seq=gene; coord=8:173052583..173056735:1;IPR001245:Tyrosine protein kinase;IPR017441:Protein kinase, ATP binding site;IPR008271:Serine/threonine protein kinase, active site;IPR002290:Serine/threonine protein kinase;IPR011009:Protein kinase-like;IPR017442:Serine/threonine protein kinase-related;IPR001245:Tyrosine protein kinase;IPR017441:Protein kinase, ATP binding site;IPR008271:Serine/threonine …	GO:0009536//plastid;GO:0009536//plastid;GO:0009536//plastid;GO:0009536//plastid;GO:0009536//plastid;GO:0009536//plastid	-	-	gi|242058695|ref|XP_002458493.1|/8.20007e-157/hypothetical protein SORBIDRAFT_03g034710 [Sorghum bicolor]	GRMZM2G470499
GRMZM2G040828	2	0.48	10	2.39	3	0.72	seq=gene; coord=1:28746878..28748387:-1;IPR002885:Pentatricopeptide repeat;	GO:0005739//mitochondrion	-	-	gi|219363671|ref|NP_001136913.1|/0/hypothetical protein LOC100217071 [Zea mays]	GRMZM2G040828
GRMZM2G102347	153	36.63	50	11.97	39	9.34	seq=gene; coord=1:34475907..34479526:-1;IPR004345:TB2/DP1 and HVA22 related protein;IPR004345:TB2/DP1 and HVA22 related protein;IPR004345:TB2/DP1 and HVA22 related protein;IPR004345:TB2/DP1 and HVA22 related protein;	-	-	-	gi|224032995|gb|ACN35573.1|/5.13769e-54/unknown [Zea mays]	GRMZM2G102347
GRMZM2G086430	50	11.97	43	10.29	30	7.18	seq=gene; coord=2:16268802..16274173:-1;IPR016196:Major facilitator superfamily, general substrate transporter;IPR004331:SPX, N-terminal;IPR011701:Major facilitator superfamily MFS-1;IPR016196:Major facilitator superfamily, general substrate transporter;	-	-	-	gi|242074056|ref|XP_002446964.1|/1.31421e-44/hypothetical protein SORBIDRAFT_06g025950 [Sorghum bicolor]	GRMZM2G086430
GRMZM2G160514	251	60.1	204	48.84	215	51.48	seq=gene; coord=3:9097598..9101832:-1;IPR000104:Antifreeze protein, type I;IPR000104:Antifreeze protein, type I;	-	-	-	gi|195658669|gb|ACG48802.1|/8.4084e-108/hypothetical protein [Zea mays]	GRMZM2G160514
GRMZM2G429972	0	0	196	46.93	0	0	seq=gene; coord=9:132389338..132395021:1	-	-	-	gi|293330965|ref|NP_001169962.1|/7.1754e-83/hypothetical protein LOC100383861 [Zea mays]	GRMZM2G429972
GRMZM2G164538	163	39.03	186	44.53	151	36.15	seq=gene; coord=10:95180798..95186529:1;IPR013861:Protein of unknown function DUF1751, integral membrane, eukaryotic;IPR013861:Protein of unknown function DUF1751, integral membrane, eukaryotic;	-	-	-	gi|212275404|ref|NP_001130932.1|/3.1231e-146/hypothetical protein LOC100192037 [Zea mays]	GRMZM2G164538
GRMZM2G161302	3	0.72	0	0	2	0.48	seq=gene; coord=7:126330264..126333738:1;IPR012458:Protein of unknown function DUF1664;	-	-	-	gi|212722760|ref|NP_001131325.1|/1.5091e-91/hypothetical protein LOC100192639 [Zea mays]	GRMZM2G161302
GRMZM2G074466	60	14.37	156	37.35	160	38.31	seq=gene; coord=3:218258134..218271119:-1;IPR011046:WD40 repeat-like;IPR001680:WD40 repeat;	-	-	-	gi|218188512|gb|EEC70939.1|/0/hypothetical protein OsI_02530 [Oryza sativa Indica Group]	GRMZM2G074466
GRMZM2G121418	0	0	0	0	1	0.24	seq=gene; coord=9:42543975..42547464:1;IPR016196:Major facilitator superfamily, general substrate transporter;	-	-	-	gi|125539192|gb|EAY85587.1|/3.74405e-139/hypothetical protein OsI_06959 [Oryza sativa Indica Group]	GRMZM2G121418
GRMZM2G046658	70	16.76	60	14.36	50	11.97	seq=gene; coord=1:127870468..127889544:-1;IPR001841:Zinc finger, RING-type;IPR001841:Zinc finger, RING-type;	-	-	-	gi|212723214|ref|NP_001132340.1|/0/hypothetical protein LOC100193782 [Zea mays]	GRMZM2G046658
GRMZM2G045135	84	20.11	214	51.24	133	31.84	seq=gene; coord=1:196438430..196442688:1;IPR006356:HAD-superfamily hydrolase, subfamily IIA, hypothetical 3;IPR005834:Haloacid dehalogenase-like hydrolase;IPR006356:HAD-superfamily hydrolase, subfamily IIA, hypothetical 3;IPR005834:Haloacid dehalogenase-like hydrolase;	-	-	-	gi|226493088|ref|NP_001150664.1|/1.72968e-166/LOC100284297 [Zea mays]	GRMZM2G045135
GRMZM2G006428	79	18.91	133	31.84	88	21.07	seq=gene; coord=10:126993509..127003755:1	GO:0016020//membrane;GO:0016020//membrane	-	-	gi|226506396|ref|NP_001141318.1|/0/hypothetical protein LOC100273409 [Zea mays]	GRMZM2G006428
GRMZM2G029632	54	12.93	59	14.13	60	14.37	seq=gene; coord=2:168351949..168356699:-1;IPR013234:PIGA, GPI anchor biosynthesis;IPR001296:Glycosyl transferase, group 1;IPR013234:PIGA, GPI anchor biosynthesis;IPR013234:PIGA, GPI anchor biosynthesis;	GO:0005783//endoplasmic reticulum;GO:0000506//glycosylphosphatidylinositol-N-acetylglucosaminyltransferase (GPI-GnT) complex;GO:0000506//glycosylphosphatidylinositol-N-acetylglucosaminyltransferase (GPI-GnT) complex	GO:0008194//UDP-glycosyltransferase activity;GO:0017176//phosphatidylinositol N-acetylglucosaminyltransferase activity;GO:0017176//phosphatidylinositol N-acetylglucosaminyltransferase activity	-	gi|293332789|ref|NP_001169463.1|/0/hypothetical protein LOC100383334 [Zea mays]	GRMZM2G029632
GRMZM2G090905	7	1.68	5	1.2	2	0.48	seq=gene; coord=6:144743201..144745581:1;IPR006589:Glycosyl hydrolase, family 13, subfamily, catalytic region;IPR017853:Glycoside hydrolase, catalytic core;IPR014756:Immunoglobulin E-set;IPR004193:Glycoside hydrolase, family 13, N-terminal;	-	GO:0004553//hydrolase activity, hydrolyzing O-glycosyl compounds;GO:0043169//cation binding	GO:0005975//carbohydrate metabolic process	gi|195657421|gb|ACG48178.1|/0/isoamylase-type starch debranching enzyme ISO2 [Zea mays]	GRMZM2G090905
GRMZM2G158489	61	14.61	137	32.8	83	19.87	seq=gene; coord=7:13487877..13490943:1;IPR001680:WD40 repeat;IPR011046:WD40 repeat-like;IPR011046:WD40 repeat-like;IPR001680:WD40 repeat;IPR011046:WD40 repeat-like;IPR001680:WD40 repeat;	-	-	-	gi|242043182|ref|XP_002459462.1|/3.36924e-123/hypothetical protein SORBIDRAFT_02g005080 [Sorghum bicolor]	GRMZM2G158489
GRMZM2G140917	3	0.72	10	2.39	13	3.11	seq=gene; coord=6:85627983..85636336:1;IPR012338:Beta-lactamase-type transpeptidase fold;IPR011009:Protein kinase-like;IPR004147:ABC-1;IPR001466:Beta-lactamase-related;	-	-	-	gi|218198836|gb|EEC81263.1|/0/hypothetical protein OsI_24357 [Oryza sativa Indica Group]	GRMZM2G140917
GRMZM2G336908	2	0.48	2	0.48	0	0	seq=gene; coord=8:115478225..115482360:-1;IPR000422:DHBP synthase RibB;IPR000926:GTP cyclohydrolase II;IPR017945:DHBP synthase RibB-like alpha/beta domain;IPR000422:DHBP synthase RibB;IPR016299:Riboflavin biosynthesis protein RibA;IPR017945:DHBP synthase RibB-like alpha/beta domain;	GO:0009536//plastid;GO:0009536//plastid	-	-	gi|226494421|ref|NP_001149201.1|/0/riboflavin biosynthesis protein ribAB [Zea mays]	GRMZM2G336908
GRMZM2G094003	1	0.24	0	0	0	0	seq=gene; coord=10:78515354..78516643:1	-	-	-	gi|223949459|gb|ACN28813.1|/1.26223e-104/unknown [Zea mays]	GRMZM2G094003
GRMZM2G074270	23	5.51	41	9.82	74	17.72	seq=gene; coord=1:191318306..191321753:1;IPR013216:Methyltransferase type 11;IPR013217:Methyltransferase type 12;	-	-	-	gi|212724066|ref|NP_001132547.1|/3.13845e-110/hypothetical protein LOC100194012 [Zea mays]	GRMZM2G074270
GRMZM2G150014	72	17.24	95	22.74	47	11.25	seq=gene; coord=10:147118580..147121486:-1;IPR000850:Adenylate kinase;IPR006259:Adenylate kinase, subfamily;IPR000850:Adenylate kinase;IPR000104:Antifreeze protein, type I;IPR000850:Adenylate kinase;IPR000104:Antifreeze protein, type I;	GO:0005739//mitochondrion;GO:0005739//mitochondrion;GO:0005739//mitochondrion	-	-	gi|223975427|gb|ACN31901.1|/6.84814e-69/unknown [Zea mays]	GRMZM2G150014
GRMZM2G146222	12	2.87	3	0.72	19	4.55	seq=gene; coord=4:193632707..193634229:-1	-	-	-	gi|226533508|ref|NP_001150909.1|/6.56758e-37/phytosulfokines 2 [Zea mays]	GRMZM2G146222
AC186231.4_FG002	42	10.06	7	1.68	0	0	seq=gene; coord=1:202455013..202455852:1;IPR000116:High mobility group, HMG-I and HMG-Y	-	-	-	gi|226508062|ref|NP_001140422.1|/4.54592e-29/hypothetical protein LOC100272479 [Zea mays]	AC186231.4_FG002
GRMZM2G314955	131	31.37	154	36.87	40	9.58	seq=gene; coord=2:208932665..208943433:1;IPR004182:GRAM;IPR004182:GRAM;	-	-	-	gi|226497086|ref|NP_001145906.1|/4.09702e-78/hypothetical protein LOC100279424 [Zea mays]	GRMZM2G314955
GRMZM2G076029	30	7.18	7	1.68	4	0.96	seq=gene; coord=3:27998092..27999605:-1	-	-	-	-	GRMZM2G076029
GRMZM2G042893	39	9.34	40	9.58	16	3.83	seq=gene; coord=2:80328410..80331659:-1;IPR011598:Helix-loop-helix DNA-binding;IPR001092:Basic helix-loop-helix dimerisation region bHLH;IPR001092:Basic helix-loop-helix dimerisation region bHLH;IPR011598:Helix-loop-helix DNA-binding;IPR011598:Helix-loop-helix DNA-binding;IPR011598:Helix-loop-helix DNA-binding;IPR001092:Basic helix-loop-helix dimerisation region bHLH;IPR011598:Helix-loop-helix DN…	-	-	-	gi|212721346|ref|NP_001132214.1|/0/hypothetical protein LOC100193646 [Zea mays]	GRMZM2G042893
GRMZM2G151668	15	3.59	27	6.46	116	27.77	seq=gene; coord=3:14871987..14873956:-1	-	-	-	gi|293337237|ref|NP_001168763.1|/7.5811e-33/hypothetical protein LOC100382560 [Zea mays]	GRMZM2G151668
GRMZM2G073404	48	11.49	60	14.36	22	5.27	seq=gene; coord=8:140753351..140757912:1	-	-	-	gi|226533130|ref|NP_001144318.1|/5.39898e-113/hypothetical protein LOC100277211 [Zea mays]	GRMZM2G073404
GRMZM2G134313	72	17.24	27	6.46	101	24.18	seq=gene; coord=4:196671029..196677698:-1;IPR000408:Regulator of chromosome condensation, RCC1;IPR009091:Regulator of chromosome condensation/beta-lactamase-inhibitor protein II;IPR000408:Regulator of chromosome condensation, RCC1;IPR009091:Regulator of chromosome condensation/beta-lactamase-inhibitor protein II;IPR000408:Regulator of chromosome condensation, RCC1;IPR009091:Regulator of chromosom…	-	-	-	gi|212721370|ref|NP_001132850.1|/0/hypothetical protein LOC100194342 [Zea mays]	GRMZM2G134313
GRMZM2G117057	1	0.24	0	0	0	0	seq=gene; coord=6:121679304..121680843:1;IPR001858:Phosphatidylethanolamine-binding, conserved site;IPR008914:Phosphatidylethanolamine-binding protein PEBP;IPR001858:Phosphatidylethanolamine-binding, conserved site;IPR008914:Phosphatidylethanolamine-binding protein PEBP;	-	-	-	gi|163838758|ref|NP_001106264.1|/6.7742e-81/ZCN11 protein [Zea mays]	GRMZM2G117057
GRMZM2G447717	2	0.48	9	2.15	7	1.68	seq=gene; coord=5:87505600..87511680:1;IPR018303:ATPase, P-type phosphorylation site;IPR001757:ATPase, P-type, K/Mg/Cd/Cu/Zn/Na/Ca/Na/H-transporter;IPR008250:ATPase, P-type, ATPase-associated region;	-	-	-	gi|242064194|ref|XP_002453386.1|/3.28464e-144/hypothetical protein SORBIDRAFT_04g005130 [Sorghum bicolor]	GRMZM2G447717
GRMZM2G040672	39	9.34	17	4.07	4	0.96	seq=gene; coord=2:11270500..11272687:1;IPR003742:SPOUT methyltransferase, predicted;IPR003742:SPOUT methyltransferase, predicted;	-	-	-	gi|195649513|gb|ACG44224.1|/3.68284e-108/hypothetical protein [Zea mays]	GRMZM2G040672
GRMZM2G111066	0	0	4	0.96	0	0	seq=gene; coord=9:101847958..101849255:-1	-	-	-	gi|226501732|ref|NP_001145446.1|/7.43246e-54/hypothetical protein LOC100278825 [Zea mays]	GRMZM2G111066
GRMZM2G065030	12	2.87	1	0.24	21	5.03	seq=gene; coord=4:161361988..161364559:-1;IPR002961:Tumour necrosis factor c/lymphotoxin-beta;IPR005946:Phosphoribosyl pyrophosphokinase;IPR000836:Phosphoribosyltransferase;	GO:0009536//plastid	-	-	gi|226506888|ref|NP_001147034.1|/3.44479e-167/ribose-phosphate pyrophosphokinase 4 [Zea mays]	GRMZM2G065030
GRMZM2G035563	16	3.83	12	2.87	15	3.59	seq=gene; coord=4:43647082..43651513:-1;IPR009003:Peptidase, trypsin-like serine and cysteine;	-	-	-	gi|242079877|ref|XP_002444707.1|/0/hypothetical protein SORBIDRAFT_07g026410 [Sorghum bicolor]	GRMZM2G035563
GRMZM2G113396	14	3.35	93	22.27	39	9.34	seq=gene; coord=2:203971661..203975292:1	-	GO:0019787//small conjugating protein ligase activity	GO:0019941//modification-dependent protein catabolic process;GO:0051246//regulation of protein metabolic process;GO:0043687//post-translational protein modification	gi|226530478|ref|NP_001148609.1|/5.73477e-77/ubiquitin-conjugating enzyme E2 E3 [Zea mays]	GRMZM2G113396
GRMZM2G316007	15	3.59	4	0.96	1	0.24	seq=gene; coord=9:71868209..71869270:-1;IPR001965:Zinc finger, PHD-type;IPR001841:Zinc finger, RING-type;IPR011016:Zinc finger, RING-CH-type;IPR007527:Zinc finger, SWIM-type;	-	GO:0005488//binding	-	gi|242093302|ref|XP_002437141.1|/4.30413e-105/hypothetical protein SORBIDRAFT_10g021880 [Sorghum bicolor]	GRMZM2G316007
GRMZM2G148536	572	136.95	1025	245.4	362	86.67	seq=gene; coord=1:118067692..118070258:-1;IPR001938:Thaumatin, pathogenesis-related;IPR001938:Thaumatin, pathogenesis-related;IPR001938:Thaumatin, pathogenesis-related;	-	-	-	gi|226529818|ref|NP_001150407.1|/2.28627e-111/thaumatin-like protein 1 [Zea mays]	GRMZM2G148536
GRMZM2G447987	24	5.75	171	40.94	55	13.17	seq=gene; coord=2:217809972..217814661:-1	-	-	-	gi|293333033|ref|NP_001170644.1|/1.49962e-137/hypothetical protein LOC100384697 [Zea mays]	GRMZM2G447987
GRMZM2G135354	55	13.17	47	11.25	63	15.08	seq=gene; coord=2:222825277..222827621:1;IPR009053:Prefoldin;IPR002777:Prefoldin beta-like;	-	-	-	gi|195637780|gb|ACG38358.1|/5.41604e-76/prefoldin subunit 2 [Zea mays]	GRMZM2G135354
GRMZM2G075148	3	0.72	1	0.24	0	0	seq=gene; coord=2:210144624..210152441:-1;IPR000612:Uncharacterised protein family UPF0057;IPR000612:Uncharacterised protein family UPF0057;	GO:0005624//membrane fraction;GO:0016023//cytoplasmic membrane-bounded vesicle;GO:0005886//plasma membrane;GO:0016021//integral to membrane;GO:0005624//membrane fraction;GO:0016023//cytoplasmic membrane-bounded vesicle;GO:0005886//plasma membrane;GO:0016021//integral to membrane	-	GO:0009414//response to water deprivation;GO:0009409//response to cold;GO:0009737//response to abscisic acid stimulus;GO:0009651//response to salt stress;GO:0009414//response to water deprivation;GO:0009409//response to cold;GO:0009737//response to abscisic acid stimulus;GO:0009651//response to salt stress	gi|226501460|ref|NP_001147403.1|/3.11387e-25/hydrophobic protein LTI6A [Zea mays]	GRMZM2G075148
GRMZM2G157102	16	3.83	39	9.34	24	5.75	seq=gene; coord=2:32727293..32730883:-1;IPR006162:Phosphopantetheine attachment site;IPR016196:Major facilitator superfamily, general substrate transporter;IPR004324:Biopterin transport-related protein BT1;	GO:0016020//membrane	-	-	gi|242073612|ref|XP_002446742.1|/0/hypothetical protein SORBIDRAFT_06g021580 [Sorghum bicolor]	GRMZM2G157102
GRMZM2G136887	118	28.25	110	26.34	106	25.38	seq=gene; coord=8:139045910..139053620:1;IPR001005:SANT, DNA-binding;IPR009057:Homeodomain-like;IPR009057:Homeodomain-like;IPR014778:Myb, DNA-binding;IPR005818:Histone H1/H5;IPR001005:SANT, DNA-binding;	GO:0000786//nucleosome;GO:0005634//nucleus;GO:0000786//nucleosome;GO:0005634//nucleus	GO:0003677//DNA binding;GO:0003677//DNA binding	GO:0045449//regulation of transcription;GO:0006334//nucleosome assembly;GO:0045449//regulation of transcription;GO:0006334//nucleosome assembly	gi|226491598|ref|NP_001141858.1|/5.43126e-131/hypothetical protein LOC100274000 [Zea mays]	GRMZM2G136887
GRMZM2G027056	51	12.21	79	18.91	83	19.87	seq=gene; coord=10:144590625..144592315:-1	-	-	-	gi|242077384|ref|XP_002448628.1|/2.38263e-157/hypothetical protein SORBIDRAFT_06g030470 [Sorghum bicolor]	GRMZM2G027056
GRMZM2G032648	55	13.17	47	11.25	18	4.31	seq=gene; coord=5:24472700..24475029:-1;IPR000644:Cystathionine beta-synthase, core;	-	-	-	gi|226528840|ref|NP_001141815.1|/7.81796e-163/hypothetical protein LOC100273954 [Zea mays]	GRMZM2G032648
GRMZM2G419085	260	62.25	353	84.51	232	55.55	seq=gene; coord=3:39734635..39739197:-1;IPR008409:Breast carcinoma amplified sequence 2;IPR008409:Breast carcinoma amplified sequence 2;IPR008409:Breast carcinoma amplified sequence 2;	-	GO:0005515//protein binding;GO:0005515//protein binding;GO:0005515//protein binding;GO:0005515//protein binding	-	gi|224032597|gb|ACN35374.1|/1.62262e-139/unknown [Zea mays]	GRMZM2G419085
GRMZM2G376918	51	12.21	58	13.89	51	12.21	seq=gene; coord=9:21614816..21619623:1;IPR002569:Methionine sulphoxide reductase A;IPR002569:Methionine sulphoxide reductase A;IPR002885:Pentatricopeptide repeat;IPR008266:Tyrosine protein kinase, active site;	-	-	-	gi|242094598|ref|XP_002437789.1|/0/hypothetical protein SORBIDRAFT_10g002620 [Sorghum bicolor]	GRMZM2G376918
GRMZM2G089193	14	3.35	94	22.51	35	8.38	seq=gene; coord=7:8814447..8816807:-1	-	-	-	gi|223943391|gb|ACN25779.1|/0/unknown [Zea mays]	GRMZM2G089193
GRMZM2G129147	159	38.07	166	39.74	536	128.33	seq=gene; coord=10:140576863..140580656:1;IPR014978:Glutamine-Leucine-Glutamine, QLQ;IPR014977:WRC;	GO:0005634//nucleus;GO:0009536//plastid	GO:0016818//hydrolase activity, acting on acid anhydrides, in phosphorus-containing anhydrides	GO:0045449//regulation of transcription	gi|195626150|gb|ACG34905.1|/1.83539e-115/growth-regulating factor [Zea mays]	GRMZM2G129147
GRMZM2G094581	89	21.31	196	46.93	173	41.42	seq=gene; coord=6:22320625..22330223:-1;IPR018611:Protein of unknown function DUF2042;	-	-	-	gi|242086689|ref|XP_002439177.1|/0/hypothetical protein SORBIDRAFT_09g001810 [Sorghum bicolor]	GRMZM2G094581
GRMZM2G087207	110	26.34	84	20.11	174	41.66	seq=gene; coord=1:4044170..4048857:1;IPR010122:Hydroxymethylglutaryl-CoA synthase, eukaryotic;IPR016039:Thiolase-like;IPR013528:Hydroxymethylglutaryl-coenzyme A synthase, N-terminal;IPR013746:Hydroxymethylglutaryl-coenzyme A synthase C-terminal;IPR000590:Hydroxymethylglutaryl-coenzyme A synthase, active site;	-	-	-	gi|293333798|ref|NP_001170696.1|/0/hypothetical protein LOC100384769 [Zea mays]	GRMZM2G087207
GRMZM2G170161	123	29.45	59	14.13	139	33.28	seq=gene; coord=2:222698315..222702905:1;IPR005607:BSD;	-	-	-	gi|239047364|ref|NP_001132157.2|/6.73227e-164/hypothetical protein LOC100193577 [Zea mays]	GRMZM2G170161
GRMZM2G090087	247	59.14	792	189.62	602	144.13	seq=gene; coord=6:161569937..161577869:-1;IPR016160:Aldehyde dehydrogenase, conserved site;IPR005479:Carbamoyl phosphate synthetase, large subunit, ATP-binding;IPR016161:Aldehyde/histidinol dehydrogenase;IPR015590:Aldehyde dehydrogenase;IPR016160:Aldehyde dehydrogenase, conserved site;IPR005479:Carbamoyl phosphate synthetase, large subunit, ATP-binding;IPR016161:Aldehyde/histidinol dehydrogenase;…	-	GO:0016491//oxidoreductase activity;GO:0016491//oxidoreductase activity;GO:0016491//oxidoreductase activity;GO:0016491//oxidoreductase activity	GO:0008152//metabolic process;GO:0008152//metabolic process;GO:0008152//metabolic process;GO:0008152//metabolic process	gi|18449341|gb|AAL70108.1|AF467541_1/0/putative aldehyde dehydrogenase MIS1 [Zea mays]	GRMZM2G090087
GRMZM2G058120	4	0.96	10	2.39	40	9.58	seq=gene; coord=4:198971575..198973949:1	-	-	-	gi|226506234|ref|NP_001143519.1|/0/hypothetical protein LOC100276202 [Zea mays]	GRMZM2G058120
GRMZM2G151576	195	46.69	226	54.11	217	51.95	seq=gene; coord=1:38055756..38065948:1;IPR017066:S-ribonuclease binding protein, SBP1, pollen;IPR001841:Zinc finger, RING-type;	-	-	-	gi|195636040|gb|ACG37488.1|/2.17058e-159/CONSTANS interacting protein 4 [Zea mays]	GRMZM2G151576
GRMZM2G039463	1	0.24	0	0	0	0	seq=gene; coord=5:123546937..123549689:-1;IPR004304:Acetamidase/Formamidase;	-	-	-	gi|219363391|ref|NP_001136897.1|/1.2329e-112/hypothetical protein LOC100217054 [Zea mays]	GRMZM2G039463
GRMZM2G352618	26	6.23	6	1.44	2	0.48	seq=gene; coord=6:128755419..128756289:-1	GO:0009536//plastid	-	-	gi|226501544|ref|NP_001144674.1|/1.1126e-33/hypothetical protein LOC100277700 [Zea mays]	GRMZM2G352618
GRMZM2G703021	2	0.48	8	1.92	14	3.35	seq=gene; coord=2:44476686..44478987:1	-	-	-	gi|293335937|ref|NP_001170300.1|/0/hypothetical protein LOC100384264 [Zea mays]	GRMZM2G703021
GRMZM2G351990	160	38.31	64	15.32	105	25.14	seq=gene; coord=8:140249931..140253039:-1;IPR011008:Dimeric alpha-beta barrel;IPR013097:Stress responsive alpha-beta barrel;IPR011008:Dimeric alpha-beta barrel;IPR013097:Stress responsive alpha-beta barrel;	-	-	-	gi|226530706|ref|NP_001152608.1|/8.36168e-55/pop3 peptide [Zea mays]	GRMZM2G351990
GRMZM2G328795	11	2.63	11	2.63	12	2.87	seq=gene; coord=3:167474016..167477654:-1;IPR013940:Meiosis specific protein SPO22;IPR013940:Meiosis specific protein SPO22;	-	-	-	gi|238014840|gb|ACR38455.1|/0/unknown [Zea mays]	GRMZM2G328795
GRMZM2G139813	0	0	0	0	1	0.24	seq=gene; coord=2:222274112..222282345:1;IPR001176:1-aminocyclopropane-1-carboxylate synthase;IPR004838:Aminotransferases, class-I, pyridoxal-phosphate-binding site;IPR005958:Tyrosine/nicotianamine aminotransferase;IPR015424:Pyridoxal phosphate-dependent transferase, major region;IPR004839:Aminotransferase, class I and II;	-	-	-	gi|226502786|ref|NP_001146419.1|/0/hypothetical protein LOC100279999 [Zea mays]	GRMZM2G139813
GRMZM2G377713	11	2.63	26	6.22	10	2.39	seq=gene; coord=2:208144978..208152024:1;IPR002035:von Willebrand factor, type A;	-	-	-	gi|242046276|ref|XP_002461009.1|/0/hypothetical protein SORBIDRAFT_02g039160 [Sorghum bicolor]	GRMZM2G377713
GRMZM2G126745	42	10.06	56	13.41	180	43.1	seq=gene; coord=9:147384520..147387734:-1;IPR001810:Cyclin-like F-box;IPR006553:Leucine-rich repeat, cysteine-containing subtype;	-	-	-	gi|242037027|ref|XP_002465908.1|/0/hypothetical protein SORBIDRAFT_01g047960 [Sorghum bicolor]	GRMZM2G126745
GRMZM2G126646	1	0.24	12	2.87	9	2.15	seq=gene; coord=4:176668879..176673174:-1;IPR000047:Helix-turn-helix motif, lambda-like repressor;IPR009057:Homeodomain-like;IPR001356:Homeobox;IPR002913:Lipid-binding START;IPR017970:Homeobox, conserved site;	-	-	-	gi|226498004|ref|NP_001142912.1|/0/hypothetical protein LOC100275344 [Zea mays]	GRMZM2G126646
GRMZM2G124416	32	7.66	21	5.03	34	8.14	seq=gene; coord=5:211376259..211380629:-1	-	-	-	gi|242066744|ref|XP_002454661.1|/7.83872e-98/hypothetical protein SORBIDRAFT_04g035060 [Sorghum bicolor]	GRMZM2G124416
GRMZM2G004140	26	6.23	16	3.83	22	5.27	seq=gene; coord=5:1685468..1690263:-1;IPR003980:Histamine H3 receptor;IPR008507:Protein of unknown function DUF789;IPR008507:Protein of unknown function DUF789;IPR003980:Histamine H3 receptor;IPR008507:Protein of unknown function DUF789;IPR008507:Protein of unknown function DUF789;IPR008507:Protein of unknown function DUF789;IPR008507:Protein of unknown function DUF789;IPR008507:Protein of unknow…	GO:0009536//plastid;GO:0009536//plastid;GO:0009536//plastid;GO:0009536//plastid;GO:0009536//plastid;GO:0009536//plastid	-	-	gi|223944513|gb|ACN26340.1|/3.03411e-159/unknown [Zea mays]	GRMZM2G004140
GRMZM2G085035	45	10.77	23	5.51	58	13.89	seq=gene; coord=8:165372116..165373912:1;IPR001151:GPR6 orphan receptor;IPR006458:Protein of unknown function DUF623, plant;	-	-	-	gi|242059331|ref|XP_002458811.1|/1.66624e-55/hypothetical protein SORBIDRAFT_03g040770 [Sorghum bicolor]	GRMZM2G085035
GRMZM2G318633	12	2.87	23	5.51	21	5.03	seq=gene; coord=5:154878196..154880396:1;IPR008120:Dense granule Gra7 protein;IPR006459:Uncharacterised protein family UPF0497, trans-membrane plant subgroup;IPR006702:Uncharacterised protein family UPF0497, trans-membrane plant;	-	-	-	gi|288559199|sp|B6TUW9.1|U497D_MAIZE/5.18819e-64/RecName: Full=UPF0497 membrane protein 13; AltName: Full=Protein salicylic acid-induced 1	GRMZM2G318633
GRMZM2G023179	2	0.48	15	3.59	3	0.72	seq=gene; coord=8:64384226..64388476:1;IPR006818:Histone chaperone, ASF1-like;IPR006818:Histone chaperone, ASF1-like;	GO:0016023//cytoplasmic membrane-bounded vesicle;GO:0016023//cytoplasmic membrane-bounded vesicle	-	GO:0006333//chromatin assembly or disassembly	gi|226493311|ref|NP_001150125.1|/4.18317e-77/anti-silencing protein 1 [Zea mays]	GRMZM2G023179
AC210003.2_FG004	4	0.96	31	7.42	16	3.83	seq=gene; coord=2:4198666..4200965:1;IPR010255:Haem peroxidase	-	-	-	gi|226491039|ref|NP_001142258.1|/7.50171e-173/hypothetical protein LOC100274427 [Zea mays]	AC210003.2_FG004
GRMZM2G171450	37	8.86	5	1.2	106	25.38	seq=gene; coord=9:149514089..149515581:-1;IPR001650:DNA/RNA helicase, C-terminal;	-	-	-	gi|242042443|ref|XP_002468616.1|/1.48206e-96/hypothetical protein SORBIDRAFT_01g049070 [Sorghum bicolor]	GRMZM2G171450
GRMZM2G078926	11	2.63	21	5.03	18	4.31	seq=gene; coord=3:207988056..207997253:-1;IPR002290:Serine/threonine protein kinase;IPR001245:Tyrosine protein kinase;IPR011009:Protein kinase-like;IPR013210:Leucine-rich repeat, N-terminal;IPR001611:Leucine-rich repeat;	GO:0016023//cytoplasmic membrane-bounded vesicle	-	-	gi|212275129|ref|NP_001130369.1|/0/hypothetical protein LOC100191464 [Zea mays]	GRMZM2G078926
GRMZM2G027825	42	10.06	87	20.83	47	11.25	seq=gene; coord=5:4654729..4658565:1;IPR000782:FAS1 domain;	GO:0016023//cytoplasmic membrane-bounded vesicle	-	-	gi|259490623|ref|NP_001159324.1|/0/hypothetical protein LOC100304417 [Zea mays]	GRMZM2G027825
GRMZM2G045294	71	17	79	18.91	106	25.38	seq=gene; coord=4:167830049..167831348:1;IPR013090:Phospholipase A2, active site;IPR016090:Phospholipase A2;IPR016090:Phospholipase A2;IPR013090:Phospholipase A2, active site;	-	-	GO:0006629//lipid metabolic process	gi|238006044|gb|ACR34057.1|/1.17325e-32/unknown [Zea mays]	GRMZM2G045294
GRMZM2G167492	38	9.1	15	3.59	10	2.39	seq=gene; coord=8:4495372..4512518:-1;IPR003441:No apical meristem (NAM) protein;	-	-	-	gi|226493114|ref|NP_001147448.1|/0/TIP [Zea mays]	GRMZM2G167492
GRMZM2G098731	6	1.44	19	4.55	19	4.55	seq=gene; coord=6:60418525..60419811:1	GO:0005634//nucleus	GO:0016818//hydrolase activity, acting on acid anhydrides, in phosphorus-containing anhydrides	GO:0045449//regulation of transcription	gi|162461760|ref|NP_001106045.1|/3.46139e-78/putative growth-regulating factor 14 [Zea mays]	GRMZM2G098731
GRMZM2G365035	221	52.91	158	37.83	191	45.73	seq=gene; coord=2:154506888..154514752:-1;IPR008080:Parvalbumin;IPR001245:Tyrosine protein kinase;IPR011009:Protein kinase-like;IPR017442:Serine/threonine protein kinase-related;IPR018248:EF hand;IPR002290:Serine/threonine protein kinase;IPR000261:EPS15 homology (EH);IPR002048:Calcium-binding EF-hand;IPR018247:EF-HAND 1;IPR017441:Protein kinase, ATP binding site;IPR008271:Serine/threonine protein…	-	GO:0005509//calcium ion binding;GO:0005524//ATP binding;GO:0004674//protein serine/threonine kinase activity;GO:0005509//calcium ion binding;GO:0005524//ATP binding;GO:0004674//protein serine/threonine kinase activity	GO:0006468//protein amino acid phosphorylation;GO:0006468//protein amino acid phosphorylation	gi|226499796|ref|NP_001151048.1|/2.16004e-69/LOC100284681 [Zea mays]	GRMZM2G365035
GRMZM2G329033	6	1.44	4	0.96	1	0.24	seq=gene; coord=6:134585554..134589256:-1;IPR009083:Transcription factor IIA, helical;IPR009083:Transcription factor IIA, helical;	-	-	-	gi|226504288|ref|NP_001148522.1|/1.38294e-106/LOC100282138 [Zea mays]	GRMZM2G329033
GRMZM2G008106	37	8.86	17	4.07	32	7.66	seq=gene; coord=4:207383547..207385244:1;IPR008972:Cupredoxin;IPR003245:Plastocyanin-like;	-	-	-	gi|226529530|ref|NP_001150365.1|/5.8853e-85/uclacyanin-2 [Zea mays]	GRMZM2G008106
GRMZM2G012213	22	5.27	31	7.42	16	3.83	seq=gene; coord=5:203439117..203441879:1;IPR002885:Pentatricopeptide repeat;	-	-	-	gi|242062682|ref|XP_002452630.1|/0/hypothetical protein SORBIDRAFT_04g029423 [Sorghum bicolor]	GRMZM2G012213
AC194022.3_FG013	3	0.72	0	0	0	0	seq=gene; coord=3:2745575..2745844:1	-	-	-	gi|195612526|gb|ACG28093.1|/2.54107e-44/hypothetical protein [Zea mays]	AC194022.3_FG013
GRMZM2G176394	8	1.92	4	0.96	11	2.63	seq=gene; coord=2:230583533..230585418:1;IPR003591:Leucine-rich repeat, typical subtype;IPR001611:Leucine-rich repeat;IPR003591:Leucine-rich repeat, typical subtype;IPR001611:Leucine-rich repeat;IPR003591:Leucine-rich repeat, typical subtype;IPR001611:Leucine-rich repeat;	GO:0016023//cytoplasmic membrane-bounded vesicle;GO:0016023//cytoplasmic membrane-bounded vesicle;GO:0016023//cytoplasmic membrane-bounded vesicle	-	-	gi|226502316|ref|NP_001147644.1|/9.722e-159/receptor protein kinase CLAVATA1 [Zea mays]	GRMZM2G176394
GRMZM2G028700	239	57.22	138	33.04	464	111.09	seq=gene; coord=1:174503724..174514374:-1;IPR006186:Serine/threonine-specific protein phosphatase and bis(5-nucleosyl)-tetraphosphatase;IPR000104:Antifreeze protein, type I;IPR012391:Serine/threonine protein phosphatase, BSU1;IPR011043:Galactose oxidase/kelch, beta-propeller;IPR011498:Kelch repeat type 2;IPR006652:Kelch repeat type 1;IPR004843:Metallophosphoesterase;	-	-	-	gi|242086304|ref|XP_002443577.1|/0/hypothetical protein SORBIDRAFT_08g021850 [Sorghum bicolor]	GRMZM2G028700
AC193500.3_FG003	18	4.31	27	6.46	8	1.92	seq=gene; coord=1:1765068..1766219:1;IPR000960:Flavin-containing monooxygenase FMO	GO:0009536//plastid	-	-	gi|242042593|ref|XP_002468691.1|/0/hypothetical protein SORBIDRAFT_01g050390 [Sorghum bicolor]	AC193500.3_FG003
GRMZM2G444029	26	6.23	97	23.22	130	31.12	seq=gene; coord=3:64918999..64923500:1;IPR009836:Protein of unknown function DUF1399;IPR009836:Protein of unknown function DUF1399;	-	-	-	gi|212720767|ref|NP_001131571.1|/1.52969e-100/hypothetical protein LOC100192913 [Zea mays]	GRMZM2G444029
GRMZM2G100497	21	5.03	22	5.27	36	8.62	seq=gene; coord=1:65752701..65763513:-1;IPR001406:tRNA pseudouridine synthase;IPR001406:tRNA pseudouridine synthase;IPR001406:tRNA pseudouridine synthase;IPR001406:tRNA pseudouridine synthase;IPR001406:tRNA pseudouridine synthase;	-	-	-	gi|194706182|gb|ACF87175.1|/0/unknown [Zea mays]	GRMZM2G100497
GRMZM2G311036	0	0	1	0.24	1	0.24	seq=gene; coord=1:147636203..147638309:1;IPR016461:O-methyltransferase, COMT, eukaryota;IPR012967:Plant methyltransferase dimerisation;IPR001077:O-methyltransferase, family 2;	-	GO:0016740//transferase activity	-	gi|224033401|gb|ACN35776.1|/0/unknown [Zea mays]	GRMZM2G311036
GRMZM2G057262	0	0	0	0	3	0.72	seq=gene; coord=4:155846031..155847875:1;IPR001844:Chaperonin Cpn60;IPR001841:Zinc finger, RING-type;IPR018370:Chaperonin Cpn60, conserved site;IPR017066:S-ribonuclease binding protein, SBP1, pollen;IPR001844:Chaperonin Cpn60;IPR017066:S-ribonuclease binding protein, SBP1, pollen;IPR018370:Chaperonin Cpn60, conserved site;IPR001841:Zinc finger, RING-type;	-	-	-	gi|226498558|ref|NP_001148208.1|/1.78098e-65/S-ribonuclease binding protein SBP1 [Zea mays]	GRMZM2G057262
GRMZM2G701759	0	0	70	16.76	0	0	seq=gene; coord=3:132576828..132577343:1	-	-	-	-	GRMZM2G701759
GRMZM2G167253	5	1.2	9	2.15	6	1.44	seq=gene; coord=3:170720847..170724360:-1;IPR001245:Tyrosine protein kinase;IPR017441:Protein kinase, ATP binding site;IPR008271:Serine/threonine protein kinase, active site;IPR003591:Leucine-rich repeat, typical subtype;IPR002290:Serine/threonine protein kinase;IPR011009:Protein kinase-like;IPR013210:Leucine-rich repeat, N-terminal;IPR001611:Leucine-rich repeat;IPR017442:Serine/threonine protein…	GO:0016023//cytoplasmic membrane-bounded vesicle	-	-	gi|242055173|ref|XP_002456732.1|/0/hypothetical protein SORBIDRAFT_03g041570 [Sorghum bicolor]	GRMZM2G167253
GRMZM2G131597	13	3.11	40	9.58	31	7.42	seq=gene; coord=2:106474937..106482701:-1;IPR007946:AAR2;IPR007946:AAR2;IPR007946:AAR2;	-	-	-	gi|226498152|ref|NP_001149638.1|/0/cePP protein [Zea mays]	GRMZM2G131597
GRMZM2G037485	1	0.24	0	0	0	0	seq=gene; coord=9:97781084..97782567:1;IPR001463:Sodium:alanine symporter;	-	-	-	gi|293331425|ref|NP_001168583.1|/8.80142e-137/hypothetical protein LOC100382367 [Zea mays]	GRMZM2G037485
GRMZM2G103672	101	24.18	286	68.47	121	28.97	seq=gene; coord=1:251141985..251149507:-1;IPR005795:Major pollen allergen Lol pI;IPR007118:Expansin/Lol pI;IPR009009:Barwin-related endoglucanase;IPR005132:Rare lipoprotein A;IPR007117:Pollen allergen/expansin, C-terminal;IPR005795:Major pollen allergen Lol pI;IPR007118:Expansin/Lol pI;IPR009009:Barwin-related endoglucanase;IPR005132:Rare lipoprotein A;IPR007117:Pollen allergen/expansin, C-termin…	GO:0016023//cytoplasmic membrane-bounded vesicle;GO:0016023//cytoplasmic membrane-bounded vesicle;GO:0016023//cytoplasmic membrane-bounded vesicle;GO:0016023//cytoplasmic membrane-bounded vesicle	-	-	gi|226506340|ref|NP_001148569.1|/5.15258e-159/beta-expansin 4 [Zea mays]	GRMZM2G103672
GRMZM2G007288	46	11.01	64	15.32	50	11.97	seq=gene; coord=5:143844076..143849577:1;IPR001841:Zinc finger, RING-type;	-	-	-	gi|226505120|ref|NP_001143691.1|/0/hypothetical protein LOC100276421 [Zea mays]	GRMZM2G007288
GRMZM2G168552	4	0.96	0	0	0	0	seq=gene; coord=8:155786769..155787746:-1;IPR003496:ABA/WDS induced protein;	-	-	-	gi|226496359|ref|NP_001152067.1|/1.37997e-63/bundle sheath cell specific protein 1 [Zea mays]	GRMZM2G168552
GRMZM2G016605	95	22.75	60	14.36	391	93.61	seq=gene; coord=8:105362922..105365658:1;IPR013094:Alpha/beta hydrolase fold-3;IPR002168:Lipase, GDXG, active site;IPR002168:Lipase, GDXG, active site;IPR013094:Alpha/beta hydrolase fold-3;IPR002168:Lipase, GDXG, active site;IPR013094:Alpha/beta hydrolase fold-3;	GO:0005634//nucleus;GO:0005634//nucleus;GO:0005634//nucleus;GO:0005634//nucleus;GO:0005634//nucleus	-	GO:0009739//response to gibberellin stimulus;GO:0009739//response to gibberellin stimulus;GO:0009739//response to gibberellin stimulus;GO:0009739//response to gibberellin stimulus;GO:0009739//response to gibberellin stimulus	gi|169159258|tpe|CAP64328.1|/7.30847e-159/TPA: putative GID1-like gibberellin receptor [Zea mays]	GRMZM2G016605
GRMZM2G101900	55	13.17	87	20.83	112	26.82	seq=gene; coord=10:39031450..39035931:-1;IPR002082:Aspartate carbamoyltransferase, eukaryotic;IPR006130:Aspartate/ornithine carbamoyltransferase;IPR002292:Ornithine carbamoyltransferase;IPR006132:Aspartate/ornithine carbamoyltransferase, carbamoyl-P binding;IPR006131:Aspartate/ornithine carbamoyltransferase, Asp/Orn-binding region;IPR002082:Aspartate carbamoyltransferase, eukaryotic;IPR006130:Asp…	-	-	-	gi|238013300|gb|ACR37685.1|/0/unknown [Zea mays]	GRMZM2G101900
GRMZM2G034152	42	10.06	125	29.93	61	14.6	seq=gene; coord=10:62062466..62066849:-1;IPR001613:Flavin-containing amine oxidase;IPR006036:Potassium uptake protein TrkA;IPR006076:FAD dependent oxidoreductase;IPR002937:Amine oxidase;IPR006095:Glutamate/phenylalanine/leucine/valine dehydrogenase;IPR006076:FAD dependent oxidoreductase;IPR002937:Amine oxidase;IPR001613:Flavin-containing amine oxidase;IPR002937:Amine oxidase;IPR006095:Glutamate/p…	-	GO:0009055//electron carrier activity;GO:0046592//polyamine oxidase activity;GO:0009055//electron carrier activity;GO:0046592//polyamine oxidase activity;GO:0009055//electron carrier activity;GO:0046592//polyamine oxidase activity;GO:0009055//electron carrier activity;GO:0046592//polyamine oxidase activity;GO:0009055//electron carrier activity;GO:0046592//polyamine oxidase activity	GO:0055114//oxidation reduction;GO:0055114//oxidation reduction;GO:0055114//oxidation reduction;GO:0055114//oxidation reduction;GO:0055114//oxidation reduction	gi|194697824|gb|ACF82996.1|/0/unknown [Zea mays]	GRMZM2G034152
GRMZM2G391487	0	0	0	0	1	0.24	seq=gene; coord=5:211886080..211889291:-1;IPR001320:Ionotropic glutamate receptor;IPR001828:Extracellular ligand-binding receptor;	GO:0016023//cytoplasmic membrane-bounded vesicle	-	-	gi|115449127|ref|NP_001048343.1|/0/Os02g0787600 [Oryza sativa (japonica cultivar-group)]	GRMZM2G391487
GRMZM2G106622	59	14.13	6	1.44	18	4.31	seq=gene; coord=10:14360241..14363474:1;IPR004182:GRAM;	-	-	-	gi|226497210|ref|NP_001152088.1|/1.68772e-138/ABA-responsive protein [Zea mays]	GRMZM2G106622
GRMZM2G027100	5	1.2	100	23.94	98	23.46	seq=gene; coord=3:2710473..2711063:-1	-	-	-	gi|195617976|gb|ACG30818.1|/1.29702e-24/hypothetical protein [Zea mays]	GRMZM2G027100
GRMZM2G351469	0	0	2	0.48	0	0	seq=gene; coord=7:157928246..157928861:-1	-	-	-	gi|226494095|ref|NP_001143301.1|/1.29641e-09/hypothetical protein LOC100275855 [Zea mays]	GRMZM2G351469
GRMZM2G413853	2	0.48	2	0.48	0	0	seq=gene; coord=1:229079201..229096508:-1	GO:0009536//plastid;GO:0009536//plastid;GO:0009536//plastid	GO:0003725//double-stranded RNA binding;GO:0008026//ATP-dependent helicase activity;GO:0005515//protein binding;GO:0005524//ATP binding;GO:0004525//ribonuclease III activity;GO:0003725//double-stranded RNA binding;GO:0008026//ATP-dependent helicase activity;GO:0005515//protein binding;GO:0005524//ATP binding;GO:0004525//ribonuclease III activity;GO:0003725//double-stranded RNA binding;GO:0008026/…	GO:0006396//RNA processing;GO:0006396//RNA processing;GO:0006396//RNA processing	gi|242039323|ref|XP_002467056.1|/0/hypothetical protein SORBIDRAFT_01g018890 [Sorghum bicolor]	GRMZM2G413853
GRMZM2G104613	13	3.11	198	47.4	233	55.78	seq=gene; coord=10:148484783..148488498:1;IPR001804:Isocitrate/isopropylmalate dehydrogenase;IPR004429:3-isopropylmalate dehydrogenase;	-	-	-	gi|226491271|ref|NP_001149749.1|/0/3-isopropylmalate dehydrogenase 2 [Zea mays]	GRMZM2G104613
GRMZM2G469898	70	16.76	40	9.58	26	6.22	seq=gene; coord=9:61119582..61122649:1;IPR013830:Esterase, SGNH hydrolase-type;IPR001087:Lipase, GDSL;IPR001087:Lipase, GDSL;	GO:0016023//cytoplasmic membrane-bounded vesicle;GO:0005739//mitochondrion;GO:0016023//cytoplasmic membrane-bounded vesicle;GO:0005739//mitochondrion	GO:0003824//catalytic activity;GO:0003824//catalytic activity	-	gi|194703546|gb|ACF85857.1|/0/unknown [Zea mays]	GRMZM2G469898
AC198366.3_FG004	0	0	0	0	2	0.48	seq=gene; coord=10:1373548..1375068:1;IPR005202:GRAS transcription factor	-	-	-	gi|242082582|ref|XP_002441716.1|/0/hypothetical protein SORBIDRAFT_08g001190 [Sorghum bicolor]	AC198366.3_FG004
GRMZM2G070837	2	0.48	0	0	2	0.48	seq=gene; coord=8:144724049..144726031:1;IPR000873:AMP-dependent synthetase and ligase;	-	-	-	gi|242058125|ref|XP_002458208.1|/0/hypothetical protein SORBIDRAFT_03g028990 [Sorghum bicolor]	GRMZM2G070837
GRMZM2G109624	658	157.54	537	128.57	651	155.86	seq=gene; coord=9:151289435..151293937:-1;IPR001245:Tyrosine protein kinase;IPR002290:Serine/threonine protein kinase;IPR017441:Protein kinase, ATP binding site;IPR008271:Serine/threonine protein kinase, active site;IPR011009:Protein kinase-like;IPR017442:Serine/threonine protein kinase-related;	-	GO:0005524//ATP binding;GO:0004674//protein serine/threonine kinase activity	GO:0006468//protein amino acid phosphorylation	gi|242035303|ref|XP_002465046.1|/0/hypothetical protein SORBIDRAFT_01g031220 [Sorghum bicolor]	GRMZM2G109624
GRMZM2G314903	0	0	3	0.72	1	0.24	seq=gene; coord=5:34586406..34587029:1	-	-	-	gi|195629692|gb|ACG36487.1|/1.76041e-70/oxidoreductase [Zea mays]	GRMZM2G314903
GRMZM2G534593	1	0.24	1	0.24	1	0.24	seq=gene; coord=3:173417284..173419423:-1;IPR016024:Armadillo-type fold;	-	-	-	gi|242059379|ref|XP_002458835.1|/1.66778e-175/hypothetical protein SORBIDRAFT_03g041087 [Sorghum bicolor]	GRMZM2G534593
GRMZM2G154558	0	0	0	0	1	0.24	seq=gene; coord=2:84067496..84069138:-1;IPR002213:UDP-glucuronosyl/UDP-glucosyltransferase;	-	-	-	gi|38347037|emb|CAD39889.2|/3.42057e-161/OSJNBb0067G11.12 [Oryza sativa (japonica cultivar-group)]	GRMZM2G154558
GRMZM2G148937	38	9.1	26	6.22	61	14.6	seq=gene; coord=5:1547370..1550416:-1;IPR001952:Alkaline phosphatase;IPR002528:Multi antimicrobial extrusion protein MatE;	GO:0016020//membrane	-	-	gi|226498194|ref|NP_001145798.1|/0/hypothetical protein LOC100279305 [Zea mays]	GRMZM2G148937
GRMZM2G060918	16	3.83	13	3.11	4	0.96	seq=gene; coord=9:129320630..129322162:1;IPR003657:DNA-binding WRKY;	-	-	-	gi|226495355|ref|NP_001147204.1|/2.77574e-87/WRKY55 - superfamily of TFs having WRKY and zinc finger domains [Zea mays]	GRMZM2G060918
GRMZM2G003493	1	0.24	0	0	0	0	seq=gene; coord=8:160317763..160319674:1;IPR000104:Antifreeze protein, type I;IPR000644:Cystathionine beta-synthase, core;	-	-	-	gi|242059705|ref|XP_002458998.1|/0/hypothetical protein SORBIDRAFT_03g044120 [Sorghum bicolor]	GRMZM2G003493
GRMZM2G366392	3233	774.07	775	185.55	443	106.06	seq=gene; coord=4:135201362..135204081:1;IPR018166:S-adenosylmethionine decarboxylase, conserved site;IPR018167:S-adenosylmethionine decarboxylase subgroup;IPR016067:S-adenosylmethionine decarboxylase, core;IPR001985:S-adenosylmethionine decarboxylase;IPR018167:S-adenosylmethionine decarboxylase subgroup;IPR016067:S-adenosylmethionine decarboxylase, core;IPR001985:S-adenosylmethionine decarboxyla…	-	GO:0004014//adenosylmethionine decarboxylase activity;GO:0004014//adenosylmethionine decarboxylase activity;GO:0004014//adenosylmethionine decarboxylase activity;GO:0004014//adenosylmethionine decarboxylase activity	GO:0006597//spermine biosynthetic process;GO:0008295//spermidine biosynthetic process;GO:0006597//spermine biosynthetic process;GO:0008295//spermidine biosynthetic process;GO:0006597//spermine biosynthetic process;GO:0008295//spermidine biosynthetic process;GO:0006597//spermine biosynthetic process;GO:0008295//spermidine biosynthetic process	gi|226529911|ref|NP_001149694.1|/0/S-adenosylmethionine decarboxylase proenzyme [Zea mays]	GRMZM2G366392
GRMZM2G444643	39	9.34	84	20.11	40	9.58	seq=gene; coord=5:177340137..177346697:-1;IPR006634:TRAM, LAG1 and CLN8 homology;	-	-	-	gi|212723468|ref|NP_001132141.1|/1.46316e-150/hypothetical protein LOC100193560 [Zea mays]	GRMZM2G444643
GRMZM2G353885	23	5.51	7	1.68	4	0.96	seq=gene; coord=7:105251448..105255327:-1	-	-	-	gi|242044648|ref|XP_002460195.1|/1.01719e-75/hypothetical protein SORBIDRAFT_02g024425 [Sorghum bicolor]	GRMZM2G353885
GRMZM2G171987	4	0.96	67	16.04	77	18.44	seq=gene; coord=5:7239208..7243758:-1;IPR017441:Protein kinase, ATP binding site;IPR008271:Serine/threonine protein kinase, active site;IPR001245:Tyrosine protein kinase;IPR002290:Serine/threonine protein kinase;IPR011009:Protein kinase-like;IPR017442:Serine/threonine protein kinase-related;	-	-	-	gi|226508626|ref|NP_001151441.1|/0/ATP binding protein [Zea mays]	GRMZM2G171987
GRMZM2G352255	2	0.48	5	1.2	2	0.48	seq=gene; coord=5:178510526..178511201:1	-	-	-	gi|238013442|gb|ACR37756.1|/3.48864e-41/unknown [Zea mays]	GRMZM2G352255
GRMZM2G452564	10	2.39	41	9.82	2	0.48	seq=gene; coord=3:14904292..14905812:-1	-	-	-	gi|242052037|ref|XP_002455164.1|/8.18939e-37/hypothetical protein SORBIDRAFT_03g005300 [Sorghum bicolor]	GRMZM2G452564
GRMZM2G101818	1	0.24	0	0	1	0.24	seq=gene; coord=4:242312698..242313715:-1	-	-	-	gi|226507456|ref|NP_001142735.1|/2.15143e-88/hypothetical protein LOC100275075 [Zea mays]	GRMZM2G101818
GRMZM2G122447	0	0	0	0	1	0.24	seq=gene; coord=9:97339356..97341003:1;IPR008889:VQ;	-	-	-	gi|259490541|ref|NP_001158900.1|/1.37677e-85/hypothetical protein LOC100303794 [Zea mays]	GRMZM2G122447
GRMZM2G093632	1	0.24	1	0.24	2	0.48	seq=gene; coord=2:10485240..10487268:-1;IPR003072:Orphan nuclear receptor, NOR1 type;IPR012946:X8;	-	-	-	gi|226505610|ref|NP_001141530.1|/2.68337e-97/hypothetical protein LOC100273642 [Zea mays]	GRMZM2G093632
GRMZM2G316275	3	0.72	3	0.72	0	0	seq=gene; coord=4:98762436..98763449:1;IPR003676:Auxin responsive SAUR protein;	GO:0005739//mitochondrion	GO:0005516//calmodulin binding	GO:0009734//auxin mediated signaling pathway	gi|226499538|ref|NP_001151962.1|/1.44301e-70/LOC100285599 [Zea mays]	GRMZM2G316275
GRMZM2G160032	549	131.45	418	100.08	192	45.97	seq=gene; coord=3:214768156..214776689:-1;IPR005381:Region of unknown function, putative Zinc finger, XS and XH;IPR005380:Region of unknown function XS;IPR005379:Region of unknown function XH;IPR005381:Region of unknown function, putative Zinc finger, XS and XH;IPR005380:Region of unknown function XS;IPR005379:Region of unknown function XH;IPR005381:Region of unknown function, putative Zinc finge…	-	-	-	gi|226505944|ref|NP_001146275.1|/0/hypothetical protein LOC100279850 [Zea mays]	GRMZM2G160032
GRMZM2G033138	62	14.84	113	27.05	181	43.34	seq=gene; coord=5:79005777..79019040:-1;IPR001965:Zinc finger, PHD-type;IPR001356:Homeobox;IPR009057:Homeodomain-like;IPR011011:Zinc finger, FYVE/PHD-type;IPR009057:Homeodomain-like;IPR011011:Zinc finger, FYVE/PHD-type;IPR001965:Zinc finger, PHD-type;IPR001356:Homeobox;IPR001965:Zinc finger, PHD-type;IPR001356:Homeobox;IPR009057:Homeodomain-like;IPR011011:Zinc finger, FYVE/PHD-type;	-	GO:0005488//binding;GO:0005488//binding;GO:0046872//metal ion binding;GO:0003677//DNA binding	GO:0045449//regulation of transcription	gi|242060500|ref|XP_002451539.1|/0/hypothetical protein SORBIDRAFT_04g003450 [Sorghum bicolor]	GRMZM2G033138
GRMZM2G085921	0	0	2	0.48	0	0	seq=gene; coord=8:29026487..29030322:-1	-	-	-	gi|293332399|ref|NP_001168510.1|/7.69428e-81/hypothetical protein LOC100382289 [Zea mays]	GRMZM2G085921
GRMZM2G445634	15	3.59	13	3.11	1	0.24	seq=gene; coord=1:16741838..16742760:1;IPR010399:Tify;IPR018467:CCT domain-like;	-	-	-	gi|226502272|ref|NP_001149525.1|/6.06272e-56/ZIM motif family protein [Zea mays]	GRMZM2G445634
GRMZM2G011437	82	19.63	132	31.6	80	19.15	seq=gene; coord=8:151448992..151453263:1;IPR015007:NUP50 (Nucleoporin 50 kDa);IPR000156:Ran Binding Protein 1;IPR000156:Ran Binding Protein 1;IPR015007:NUP50 (Nucleoporin 50 kDa);IPR000156:Ran Binding Protein 1;IPR015007:NUP50 (Nucleoporin 50 kDa);	-	-	-	gi|238010942|gb|ACR36506.1|/0/unknown [Zea mays]	GRMZM2G011437
AC211474.3_FG006	0	0	16	3.83	3	0.72	seq=gene; coord=8:16790093..16797549:1;IPR016040:NAD(P)-binding	GO:0005739//mitochondrion	-	-	gi|242056257|ref|XP_002457274.1|/0/hypothetical protein SORBIDRAFT_03g004640 [Sorghum bicolor]	AC211474.3_FG006
GRMZM2G316593	1	0.24	0	0	2	0.48	seq=gene; coord=10:26726418..26727788:-1;IPR009053:Prefoldin;	-	-	-	gi|242083628|ref|XP_002442239.1|/1.8506e-79/hypothetical protein SORBIDRAFT_08g016770 [Sorghum bicolor]	GRMZM2G316593
GRMZM2G164090	1	0.24	0	0	2	0.48	seq=gene; coord=8:100300837..100302076:-1;IPR003854:Gibberellin regulated protein;	GO:0016023//cytoplasmic membrane-bounded vesicle	-	-	gi|226958317|ref|NP_001152944.1|/5.71247e-42/gibberellin-regulated protein 2 [Zea mays]	GRMZM2G164090
GRMZM2G145256	1	0.24	0	0	4	0.96	seq=gene; coord=9:135608266..135612714:-1	GO:0009536//plastid	-	-	gi|293337139|ref|NP_001168264.1|/0/hypothetical protein LOC100382028 [Zea mays]	GRMZM2G145256
GRMZM2G146283	1	0.24	0	0	0	0	seq=gene; coord=2:150709129..150712686:-1;IPR003851:Zinc finger, Dof-type;	-	GO:0046872//metal ion binding	GO:0045449//regulation of transcription	gi|194695116|gb|ACF81642.1|/9.56568e-129/unknown [Zea mays]	GRMZM2G146283
GRMZM2G407287	8	1.92	37	8.86	122	29.21	seq=gene; coord=1:27493275..27503625:-1	-	-	-	gi|242036473|ref|XP_002465631.1|/0/hypothetical protein SORBIDRAFT_01g042620 [Sorghum bicolor]	GRMZM2G407287
GRMZM2G143608	5	1.2	6	1.44	6	1.44	seq=gene; coord=3:228169901..228171188:-1	-	-	-	gi|226490813|ref|NP_001143556.1|/3.17457e-31/hypothetical protein LOC100276252 [Zea mays]	GRMZM2G143608
GRMZM2G124502	36	8.62	77	18.44	79	18.91	seq=gene; coord=10:146673815..146678405:1;IPR003121:SWIB/MDM2;IPR014876:DEK, C-terminal;IPR003121:SWIB/MDM2;IPR014876:DEK, C-terminal;IPR003121:SWIB/MDM2;IPR014876:DEK, C-terminal;	-	-	-	gi|239049993|ref|NP_001131941.2|/1.77693e-134/hypothetical protein LOC100193333 [Zea mays]	GRMZM2G124502
GRMZM2G377341	184	44.05	55	13.17	55	13.17	seq=gene; coord=5:37877155..37888472:-1;IPR002016:Haem peroxidase, plant/fungal/bacterial;IPR005479:Carbamoyl phosphate synthetase, large subunit, ATP-binding;IPR016185:PreATP-grasp-like fold;IPR011054:Rudiment single hybrid motif;IPR011053:Single hybrid motif;IPR005481:Carbamoyl phosphate synthase, large subunit, N-terminal;IPR005482:Biotin carboxylase, C-terminal;IPR000089:Biotin/lipoyl attachm…	-	-	-	gi|242083634|ref|XP_002442242.1|/0/hypothetical protein SORBIDRAFT_08g016820 [Sorghum bicolor]	GRMZM2G377341
GRMZM2G092147	27	6.46	135	32.32	14	3.35	seq=gene; coord=8:64835022..64840606:1	-	-	-	gi|224033853|gb|ACN36002.1|/1.22719e-34/unknown [Zea mays]	GRMZM2G092147
GRMZM2G411071	6	1.44	2	0.48	7	1.68	seq=gene; coord=10:148814854..148816275:-1	-	-	-	gi|195549563|gb|ACG50009.1|/9.09545e-175/SnRK2.5 [Zea mays]	GRMZM2G411071
GRMZM2G040152	86	20.59	102	24.42	162	38.79	seq=gene; coord=1:21345401..21349791:-1;IPR001680:WD40 repeat;IPR011046:WD40 repeat-like;	-	-	-	gi|226509728|ref|NP_001146889.1|/0/LOC100280497 [Zea mays]	GRMZM2G040152
GRMZM2G374971	16	3.83	6	1.44	2	0.48	seq=gene; coord=7:154612892..154614210:1;IPR001938:Thaumatin, pathogenesis-related;IPR017949:Thaumatin, conserved site;	-	-	GO:0050832//defense response to fungus;GO:0006805//xenobiotic metabolic process	gi|162458913|ref|NP_001105356.1|/7.54072e-129/stress-induced protein1 precursor [Zea mays]	GRMZM2G374971
GRMZM2G070780	377	90.26	277	66.32	376	90.02	seq=gene; coord=10:81872202..81874885:1	-	-	-	gi|226533198|ref|NP_001144546.1|/6.55385e-95/hypothetical protein LOC100277547 [Zea mays]	GRMZM2G070780
GRMZM2G359664	55	13.17	6	1.44	28	6.7	seq=gene; coord=8:66971001..66974901:-1;IPR005512:Rop nucleotide exchanger, PRONE;	GO:0005739//mitochondrion;GO:0005739//mitochondrion	-	-	gi|219887505|gb|ACL54127.1|/0/unknown [Zea mays]	GRMZM2G359664
GRMZM2G122362	43	10.3	41	9.82	9	2.15	seq=gene; coord=3:209562833..209568425:1;IPR011948:Dullard-like phosphatase domain;IPR004274:NLI interacting factor;IPR004274:NLI interacting factor;IPR011948:Dullard-like phosphatase domain;	-	-	-	gi|115439031|ref|NP_001043795.1|/1.33097e-144/Os01g0665300 [Oryza sativa (japonica cultivar-group)]	GRMZM2G122362
GRMZM2G044382	75	17.96	177	42.38	66	15.8	seq=gene; coord=10:120539717..120544789:-1;IPR001932:Protein phosphatase 2C-related;IPR014045:Protein phosphatase 2C, N-terminal;	-	-	-	gi|219887567|gb|ACL54158.1|/0/unknown [Zea mays]	GRMZM2G044382
GRMZM2G337048	1	0.24	0	0	0	0	seq=gene; coord=5:31526650..31528539:1;IPR002213:UDP-glucuronosyl/UDP-glucosyltransferase;	-	-	-	gi|242034341|ref|XP_002464565.1|/0/hypothetical protein SORBIDRAFT_01g020920 [Sorghum bicolor]	GRMZM2G337048
GRMZM2G015989	373	89.31	324	77.57	42	10.06	seq=gene; coord=4:246364467..246369738:-1;IPR001844:Chaperonin Cpn60;IPR017998:Chaperone, tailless complex polypeptide 1;IPR018370:Chaperonin Cpn60, conserved site;IPR002423:Chaperonin Cpn60/TCP-1;IPR001844:Chaperonin Cpn60;IPR017998:Chaperone, tailless complex polypeptide 1;IPR002423:Chaperonin Cpn60/TCP-1;IPR018370:Chaperonin Cpn60, conserved site;IPR002423:Chaperonin Cpn60/TCP-1;	GO:0009536//plastid;GO:0009536//plastid;GO:0009536//plastid	-	-	gi|195630027|gb|ACG36615.1|/0/ruBisCO large subunit-binding protein subunit beta [Zea mays]	GRMZM2G015989
GRMZM2G126988	34	8.14	159	38.07	168	40.22	seq=gene; coord=5:32364622..32366243:-1;IPR001296:Glycosyl transferase, group 1;	GO:0009536//plastid	-	-	gi|194706962|gb|ACF87565.1|/0/unknown [Zea mays]	GRMZM2G126988
AC203909.3_FG007	0	0	1	0.24	0	0	seq=gene; coord=4:32005078..32006712:1;IPR006094:FAD linked oxidase, N-terminal	-	-	-	gi|242080639|ref|XP_002445088.1|/0/hypothetical protein SORBIDRAFT_07g003940 [Sorghum bicolor]	AC203909.3_FG007
GRMZM2G076450	121	28.97	45	10.77	29	6.94	seq=gene; coord=8:171577832..171581994:-1;IPR000210:BTB/POZ-like;IPR002110:Ankyrin;IPR011333:BTB/POZ fold;	GO:0009536//plastid	-	-	gi|226500288|ref|NP_001147587.1|/0/regulatory protein NPR1 [Zea mays]	GRMZM2G076450
GRMZM2G170969	28	6.7	4	0.96	6	1.44	seq=gene; coord=8:161459816..161460445:-1;IPR003612:Plant lipid transfer protein/seed storage/trypsin-alpha amylase inhibitor;IPR016140:Bifunctional inhibitor/plant lipid transfer protein/seed storage;	-	-	-	gi|226508598|ref|NP_001147277.1|/6.44989e-44/protease inhibitor/seed storage/LTP family protein [Zea mays]	GRMZM2G170969
GRMZM2G034840	28	6.7	100	23.94	84	20.11	seq=gene; coord=2:3325625..3331883:1	GO:0005622//intracellular;GO:0005622//intracellular	-	GO:0006417//regulation of translation;GO:0006417//regulation of translation	gi|293334075|ref|NP_001169359.1|/0/hypothetical protein LOC100383226 [Zea mays]	GRMZM2G034840
GRMZM2G333916	8	1.92	16	3.83	31	7.42	seq=gene; coord=7:11012377..11018774:-1;IPR001525:C-5 cytosine-specific DNA methylase;IPR001025:Bromo adjacent region;IPR018117:C-5 cytosine-specific DNA methylase, active site;IPR017198:DNA (cytosine-5)-methyltransferase 1;IPR001025:Bromo adjacent region;	GO:0005634//nucleus;GO:0005634//nucleus	GO:0003886//DNA (cytosine-5-)-methyltransferase activity;GO:0003677//DNA binding;GO:0005515//protein binding;GO:0003886//DNA (cytosine-5-)-methyltransferase activity;GO:0003677//DNA binding;GO:0005515//protein binding	GO:0006306//DNA methylation;GO:0006306//DNA methylation	gi|3132825|gb|AAC16389.1|/0/putative cytosine-5 DNA methyltransferase [Zea mays]	GRMZM2G333916
GRMZM2G390236	0	0	0	0	1	0.24	seq=gene; coord=3:24955027..24955828:-1	-	-	-	gi|212724036|ref|NP_001131832.1|/1.5892e-52/hypothetical protein LOC100193207 [Zea mays]	GRMZM2G390236
AC234160.1_FG004	1	0.24	0	0	0	0	seq=gene; coord=8:8408578..8409720:1;IPR001399:VP6 blue-tongue virus inner capsid protein	-	-	-	gi|238012356|gb|ACR37213.1|/1.43921e-34/unknown [Zea mays]	AC234160.1_FG004
GRMZM2G082448	36	8.62	1	0.24	1	0.24	seq=gene; coord=2:211191543..211195689:1;IPR016024:Armadillo-type fold;IPR013878:Mo25-like;IPR016024:Armadillo-type fold;IPR013878:Mo25-like;	-	-	-	gi|226503593|ref|NP_001149546.1|/2.64137e-147/protein Mo25 [Zea mays]	GRMZM2G082448
GRMZM2G331567	0	0	7	1.68	5	1.2	seq=gene; coord=8:35002098..35002672:-1	-	-	-	gi|223942889|gb|ACN25528.1|/3.93293e-55/unknown [Zea mays]	GRMZM2G331567
GRMZM2G029974	27	6.46	30	7.18	36	8.62	seq=gene; coord=8:72396330..72398404:1;IPR000104:Antifreeze protein, type I;IPR011257:DNA glycosylase;IPR003265:HhH-GPD domain;IPR011257:DNA glycosylase;IPR011257:DNA glycosylase;	GO:0009536//plastid;GO:0009536//plastid;GO:0009536//plastid	-	-	gi|212723910|ref|NP_001132742.1|/1.42895e-130/hypothetical protein LOC100194229 [Zea mays]	GRMZM2G029974
GRMZM2G121269	2	0.48	4	0.96	64	15.32	seq=gene; coord=4:243977485..243981166:-1;IPR000504:RNA recognition motif, RNP-1;IPR003954:RNA recognition, region 1;IPR003954:RNA recognition, region 1;IPR000504:RNA recognition motif, RNP-1;	-	GO:0005515//protein binding	-	gi|242063870|ref|XP_002453224.1|/3.30059e-13/hypothetical protein SORBIDRAFT_04g001910 [Sorghum bicolor]	GRMZM2G121269
GRMZM2G445421	16	3.83	4	0.96	0	0	seq=gene; coord=6:161592623..161594334:1;IPR000104:Antifreeze protein, type I;IPR003657:DNA-binding WRKY;	GO:0009536//plastid	-	-	gi|242088629|ref|XP_002440147.1|/1.01224e-57/hypothetical protein SORBIDRAFT_09g026830 [Sorghum bicolor]	GRMZM2G445421
GRMZM2G053669	531	127.14	216	51.71	1810	433.35	seq=gene; coord=1:45276025..45280058:-1;IPR006426:Asparagine synthase, glutamine-hydrolyzing;IPR000583:Glutamine amidotransferase, class-II;IPR001962:Asparagine synthase;	-	GO:0004066//asparagine synthase (glutamine-hydrolyzing) activity	GO:0006541//glutamine metabolic process;GO:0006529//asparagine biosynthetic process	gi|212275181|ref|NP_001131014.1|/0/asparagine synthetase 3 [Zea mays]	GRMZM2G053669
GRMZM2G181227	121	28.97	94	22.51	99	23.7	seq=gene; coord=10:19519949..19525989:1;IPR001165:Glycoside hydrolase, family 24, T4 lysozyme;IPR001753:Crotonase, core;IPR001165:Glycoside hydrolase, family 24, T4 lysozyme;IPR001753:Crotonase, core;	-	-	-	gi|194695892|gb|ACF82030.1|/0/unknown [Zea mays]	GRMZM2G181227
GRMZM2G352577	0	0	1	0.24	2	0.48	seq=gene; coord=3:220847851..220863392:1	-	-	-	gi|242053461|ref|XP_002455876.1|/0/hypothetical protein SORBIDRAFT_03g026680 [Sorghum bicolor]	GRMZM2G352577
GRMZM2G093951	2	0.48	3	0.72	4	0.96	seq=gene; coord=1:228003651..228005175:1;IPR010847:Harpin-induced 1;	-	-	-	gi|293332847|ref|NP_001169317.1|/5.60784e-86/hypothetical protein LOC100383182 [Zea mays]	GRMZM2G093951
GRMZM2G085254	356	85.24	318	76.13	333	79.73	seq=gene; coord=8:14363018..14368755:-1;IPR008654:IWS1, C-terminal;IPR008654:IWS1, C-terminal;IPR008654:IWS1, C-terminal;	-	-	-	gi|223949149|gb|ACN28658.1|/0/unknown [Zea mays]	GRMZM2G085254
GRMZM2G117405	0	0	2	0.48	0	0	seq=gene; coord=8:163264044..163269405:1;IPR015882:Beta-N-acetylhexosaminidase-like;IPR001540:Glycoside hydrolase, family 20;IPR017853:Glycoside hydrolase, catalytic core;IPR015882:Beta-N-acetylhexosaminidase-like;IPR015883:Glycoside hydrolase, family 20, catalytic core;	GO:0016023//cytoplasmic membrane-bounded vesicle;GO:0016023//cytoplasmic membrane-bounded vesicle	-	-	gi|293336677|ref|NP_001170188.1|/0/hypothetical protein LOC100384136 [Zea mays]	GRMZM2G117405
GRMZM2G704028	0	0	2	0.48	3	0.72	seq=gene; coord=1:263403186..263404274:-1	-	-	-	-	GRMZM2G704028
GRMZM2G306376	1	0.24	1	0.24	0	0	seq=gene; coord=2:67664654..67667448:-1	-	-	-	gi|226507798|ref|NP_001145070.1|/2.06272e-105/hypothetical protein LOC100278266 [Zea mays]	GRMZM2G306376
GRMZM2G455784	60	14.37	7	1.68	134	32.08	seq=gene; coord=1:141706277..141708945:-1	-	-	-	gi|226499650|ref|NP_001145814.1|/1.49145e-74/hypothetical protein LOC100279321 [Zea mays]	GRMZM2G455784
GRMZM2G028016	11	2.63	6	1.44	4	0.96	seq=gene; coord=6:130389434..130392800:1;IPR001891:Malic oxidoreductase;IPR015884:Malic enzyme, conserved site;IPR001917:Aminotransferase, class-II, pyridoxal-phosphate binding site;IPR016040:NAD(P)-binding;IPR012301:Malic enzyme, N-terminal;IPR012302:Malic enzyme, NAD-binding;IPR001891:Malic oxidoreductase;IPR016040:NAD(P)-binding;IPR012301:Malic enzyme, N-terminal;IPR012302:Malic enzyme, NAD-bi…	GO:0009536//plastid;GO:0009536//plastid	-	-	gi|226510109|ref|NP_001150965.1|/0/NADP-dependent malic enzyme [Zea mays]	GRMZM2G028016
GRMZM2G473367	4	0.96	9	2.15	10	2.39	seq=gene; coord=6:61452246..61457363:-1;IPR003095:Heat shock protein DnaJ;IPR001305:Heat shock protein DnaJ, cysteine-rich region;IPR008971:HSP40/DnaJ peptide-binding;IPR001623:Heat shock protein DnaJ, N-terminal;IPR002939:Chaperone DnaJ, C-terminal;	GO:0005739//mitochondrion	-	-	gi|226497142|ref|NP_001149059.1|/9.45821e-137/LOC100282679 [Zea mays]	GRMZM2G473367
GRMZM2G052750	109	26.1	100	23.94	150	35.91	seq=gene; coord=5:211705324..211727414:1	-	-	-	gi|242063298|ref|XP_002452938.1|/0/hypothetical protein SORBIDRAFT_04g035280 [Sorghum bicolor]	GRMZM2G052750
GRMZM2G065284	1	0.24	0	0	0	0	seq=gene; coord=10:124799659..124801467:1;IPR001878:Zinc finger, CCHC-type;	-	-	-	gi|242089645|ref|XP_002440655.1|/8.30497e-44/hypothetical protein SORBIDRAFT_09g004685 [Sorghum bicolor]	GRMZM2G065284
GRMZM2G108581	143	34.24	101	24.18	90	21.55	seq=gene; coord=5:60463234..60466392:1	-	-	-	gi|194700966|gb|ACF84567.1|/0/unknown [Zea mays]	GRMZM2G108581
GRMZM2G039586	0	0	0	0	1	0.24	seq=gene; coord=9:76598766..76600953:1;IPR000104:Antifreeze protein, type I;IPR000679:Zinc finger, GATA-type;	-	-	-	gi|212274543|ref|NP_001130465.1|/3.41853e-134/hypothetical protein LOC100191563 [Zea mays]	GRMZM2G039586
GRMZM2G030494	20	4.79	26	6.22	14	3.35	seq=gene; coord=1:196191597..196193484:-1;IPR001179:Peptidyl-prolyl cis-trans isomerase, FKBP-type;	GO:0009536//plastid;GO:0009536//plastid	GO:0003755//peptidyl-prolyl cis-trans isomerase activity;GO:0005515//protein binding;GO:0003755//peptidyl-prolyl cis-trans isomerase activity;GO:0005515//protein binding	GO:0006457//protein folding;GO:0006457//protein folding	gi|242082001|ref|XP_002445769.1|/1.10307e-69/hypothetical protein SORBIDRAFT_07g025510 [Sorghum bicolor]	GRMZM2G030494
GRMZM2G473480	2	0.48	1	0.24	3	0.72	seq=gene; coord=4:2637238..2639138:1	-	GO:0020037//heme binding;GO:0004497//monooxygenase activity;GO:0009055//electron carrier activity	GO:0055114//oxidation reduction	gi|293335459|ref|NP_001168758.1|/0/hypothetical protein LOC100382554 [Zea mays]	GRMZM2G473480
GRMZM2G026391	2	0.48	2	0.48	1	0.24	seq=gene; coord=10:133437610..133441514:-1;IPR004813:Oligopeptide transporter OPT superfamily;IPR004813:Oligopeptide transporter OPT superfamily;	GO:0005886//plasma membrane;GO:0005886//plasma membrane	GO:0005381//iron ion transmembrane transporter activity;GO:0005381//iron ion transmembrane transporter activity	GO:0006826//iron ion transport;GO:0006826//iron ion transport	gi|238011758|gb|ACR36914.1|/0/unknown [Zea mays]	GRMZM2G026391
AC197699.3_FG007	74	17.72	2	0.48	251	60.09	seq=gene; coord=9:16916883..16924632:1	GO:0005739//mitochondrion	-	-	gi|226495353|ref|NP_001145764.1|/1.82141e-49/hypothetical protein LOC100279271 [Zea mays]	AC197699.3_FG007
GRMZM2G009575	22	5.27	177	42.38	150	35.91	seq=gene; coord=7:58845007..58849330:-1;IPR001374:Single-stranded nucleic acid binding R3H;IPR001374:Single-stranded nucleic acid binding R3H;	-	-	-	gi|52077166|dbj|BAD46211.1|/1.01859e-149/unknown protein [Oryza sativa Japonica Group]	GRMZM2G009575
GRMZM2G071154	588	140.78	812	194.41	1553	371.82	seq=gene; coord=3:225190880..225193233:-1;IPR001116:Somatostatin receptor, type 1;IPR013989:Development and cell death domain;IPR013989:Development and cell death domain;IPR013989:Development and cell death domain;	-	-	-	gi|219885621|gb|ACL53185.1|/3.83724e-90/unknown [Zea mays]	GRMZM2G071154
GRMZM2G004079	70	16.76	57	13.65	39	9.34	seq=gene; coord=1:201021268..201024508:-1;IPR017441:Protein kinase, ATP binding site;IPR008271:Serine/threonine protein kinase, active site;IPR001245:Tyrosine protein kinase;IPR002290:Serine/threonine protein kinase;IPR011009:Protein kinase-like;IPR017442:Serine/threonine protein kinase-related;IPR011009:Protein kinase-like;IPR017442:Serine/threonine protein kinase-related;IPR001245:Tyrosine prot…	-	GO:0005515//protein binding;GO:0005515//protein binding;GO:0005515//protein binding	-	gi|219362635|ref|NP_001136999.1|/4.6902e-123/hypothetical protein LOC100217162 [Zea mays]	GRMZM2G004079
GRMZM2G125698	14	3.35	61	14.6	158	37.83	seq=gene; coord=10:127646621..127647707:-1;IPR000823:Plant peroxidase;IPR002016:Haem peroxidase, plant/fungal/bacterial;IPR002207:Plant ascorbate peroxidase;IPR010255:Haem peroxidase;	-	-	-	gi|238006440|gb|ACR34255.1|/1.38923e-102/unknown [Zea mays]	GRMZM2G125698
GRMZM2G093858	14	3.35	26	6.22	22	5.27	seq=gene; coord=10:83434525..83438607:-1;IPR001245:Tyrosine protein kinase;IPR002290:Serine/threonine protein kinase;IPR008271:Serine/threonine protein kinase, active site;IPR011009:Protein kinase-like;IPR017442:Serine/threonine protein kinase-related;IPR001245:Tyrosine protein kinase;IPR011009:Protein kinase-like;IPR017442:Serine/threonine protein kinase-related;IPR002290:Serine/threonine protei…	-	-	-	gi|125560089|gb|EAZ05537.1|/5.85281e-163/hypothetical protein OsI_27753 [Oryza sativa Indica Group]	GRMZM2G093858
GRMZM2G174896	132	31.6	40	9.58	200	47.88	seq=gene; coord=1:52237750..52242868:-1;IPR001245:Tyrosine protein kinase;IPR011009:Protein kinase-like;IPR017442:Serine/threonine protein kinase-related;IPR004041:NAF;IPR008271:Serine/threonine protein kinase, active site;IPR002290:Serine/threonine protein kinase;IPR001245:Tyrosine protein kinase;IPR002290:Serine/threonine protein kinase;IPR017441:Protein kinase, ATP binding site;IPR008271:Serin…	GO:0005739//mitochondrion;GO:0005739//mitochondrion;GO:0005739//mitochondrion	-	-	gi|226498074|ref|NP_001147857.1|/0/CIPK-like protein 1 [Zea mays]	GRMZM2G174896
GRMZM2G161335	418	100.08	88	21.07	78	18.67	seq=gene; coord=1:180169460..180171364:1;IPR002213:UDP-glucuronosyl/UDP-glucosyltransferase;	-	-	-	gi|226505740|ref|NP_001142152.1|/0/benzoxazinone synthesis9 [Zea mays]	GRMZM2G161335
GRMZM2G110220	2	0.48	4	0.96	0	0	seq=gene; coord=9:2249309..2250668:-1;IPR001818:Peptidase M10A and M12B, matrixin and adamalysin;IPR002477:Peptidoglycan binding-like;IPR006026:Peptidase, metallopeptidases;	GO:0016023//cytoplasmic membrane-bounded vesicle	-	-	gi|226502831|ref|NP_001142095.1|/1.46467e-167/hypothetical protein LOC100274259 [Zea mays]	GRMZM2G110220
GRMZM2G086587	45	10.77	33	7.9	44	10.53	seq=gene; coord=5:99309313..99312778:-1;IPR005398:Tubby, N-terminal;IPR008700:Defence response, Rin4;	-	-	-	gi|238006466|gb|ACR34268.1|/1.07367e-41/unknown [Zea mays]	GRMZM2G086587
GRMZM2G034933	88	21.07	83	19.87	29	6.94	seq=gene; coord=3:190170420..190174286:1;IPR016166:FAD-binding, type 2;IPR006094:FAD linked oxidase, N-terminal;IPR006093:Oxygen oxidoreductase covalent FAD-binding site;IPR006093:Oxygen oxidoreductase covalent FAD-binding site;IPR016164:FAD-linked oxidase-like, C-terminal;IPR016166:FAD-binding, type 2;IPR006094:FAD linked oxidase, N-terminal;IPR015345:Cytokinin dehydrogenase 1, FAD and cytokinin…	GO:0016023//cytoplasmic membrane-bounded vesicle;GO:0016023//cytoplasmic membrane-bounded vesicle;GO:0016023//cytoplasmic membrane-bounded vesicle;GO:0016023//cytoplasmic membrane-bounded vesicle	GO:0019139//cytokinin dehydrogenase activity;GO:0019139//cytokinin dehydrogenase activity;GO:0019139//cytokinin dehydrogenase activity;GO:0019139//cytokinin dehydrogenase activity	GO:0022900//electron transport chain;GO:0022900//electron transport chain;GO:0022900//electron transport chain;GO:0022900//electron transport chain	gi|242058873|ref|XP_002458582.1|/2.81301e-140/hypothetical protein SORBIDRAFT_03g036160 [Sorghum bicolor]	GRMZM2G034933
GRMZM2G061969	28	6.7	31	7.42	20	4.79	seq=gene; coord=8:17431358..17436121:-1;IPR000008:C2 calcium-dependent membrane targeting;IPR001736:Phospholipase D/Transphosphatidylase;IPR011402:Phospholipase D, plant;IPR008973:C2 calcium/lipid-binding region, CaLB;IPR011402:Phospholipase D, plant;IPR008973:C2 calcium/lipid-binding region, CaLB;IPR001736:Phospholipase D/Transphosphatidylase;	GO:0016020//membrane;GO:0016020//membrane	GO:0005509//calcium ion binding;GO:0070290//NAPE-specific phospholipase D activity;GO:0004630//phospholipase D activity;GO:0005509//calcium ion binding;GO:0070290//NAPE-specific phospholipase D activity;GO:0004630//phospholipase D activity	GO:0046470//phosphatidylcholine metabolic process;GO:0016042//lipid catabolic process;GO:0046470//phosphatidylcholine metabolic process;GO:0016042//lipid catabolic process	gi|223943633|gb|ACN25900.1|/0/unknown [Zea mays]	GRMZM2G061969
GRMZM2G018689	41	9.82	108	25.86	60	14.37	seq=gene; coord=10:126919462..126922347:1;IPR002661:Ribosome recycling factor;	GO:0005739//mitochondrion	-	-	gi|226508144|ref|NP_001149112.1|/4.45528e-115/LOC100282734 [Zea mays]	GRMZM2G018689
GRMZM2G149428	129	30.89	66	15.8	443	106.06	seq=gene; coord=2:216362165..216364645:-1;IPR001344:Chlorophyll A-B binding protein;	GO:0016020//membrane;GO:0005739//mitochondrion;GO:0009507//chloroplast;GO:0016020//membrane;GO:0005739//mitochondrion;GO:0009507//chloroplast;GO:0016020//membrane;GO:0005739//mitochondrion;GO:0009507//chloroplast	-	GO:0009765//photosynthesis, light harvesting;GO:0009765//photosynthesis, light harvesting;GO:0009765//photosynthesis, light harvesting	gi|224034685|gb|ACN36418.1|/1.59241e-34/unknown [Zea mays]	GRMZM2G149428
GRMZM2G701109	0	0	1	0.24	0	0	seq=gene; coord=6:129806453..129807031:1	-	-	-	-	GRMZM2G701109
GRMZM2G130749	84	20.11	92	22.03	127	30.41	seq=gene; coord=6:132718825..132725081:-1;IPR004299:Membrane bound O-acyl transferase, MBOAT;IPR004299:Membrane bound O-acyl transferase, MBOAT;	GO:0016020//membrane;GO:0016020//membrane	-	-	gi|242087173|ref|XP_002439419.1|/0/hypothetical protein SORBIDRAFT_09g006110 [Sorghum bicolor]	GRMZM2G130749
GRMZM2G105473	201	48.13	188	45.01	127	30.41	seq=gene; coord=6:159745038..159749564:1;IPR000104:Antifreeze protein, type I;IPR000104:Antifreeze protein, type I;IPR000158:Cell division protein FtsZ, N-terminal;IPR000104:Antifreeze protein, type I;	-	-	-	gi|226505526|ref|NP_001144109.1|/0/hypothetical protein LOC100276949 [Zea mays]	GRMZM2G105473
GRMZM2G098884	77	18.44	117	28.01	112	26.82	seq=gene; coord=4:30806668..30821937:1;IPR001005:SANT, DNA-binding;IPR009057:Homeodomain-like;IPR014778:Myb, DNA-binding;	-	-	-	gi|226494077|ref|NP_001149078.1|/0/LOC100282699 [Zea mays]	GRMZM2G098884
GRMZM2G010433	14	3.35	28	6.7	15	3.59	seq=gene; coord=6:113205457..113207370:1;IPR001991:Sodium:dicarboxylate symporter;IPR013057:Amino acid transporter, transmembrane;	GO:0016020//membrane	GO:0005275//amine transmembrane transporter activity	-	gi|115467218|ref|NP_001057208.1|/9.94291e-174/Os06g0228500 [Oryza sativa (japonica cultivar-group)]	GRMZM2G010433
GRMZM2G067183	64	15.32	35	8.38	0	0	seq=gene; coord=5:198616503..198618447:1	-	-	-	gi|224031571|gb|ACN34861.1|/7.06191e-46/unknown [Zea mays]	GRMZM2G067183
GRMZM2G359298	4	0.96	0	0	1	0.24	seq=gene; coord=10:103483934..103489503:-1;IPR000269:Copper amine oxidase;IPR015798:Copper amine oxidase, C-terminal;IPR016182:Copper amine oxidase, N-terminal region;IPR015800:Copper amine oxidase, N2-terminal;IPR015802:Copper amine oxidase, N3-terminal;	-	-	-	gi|242072548|ref|XP_002446210.1|/0/hypothetical protein SORBIDRAFT_06g004290 [Sorghum bicolor]	GRMZM2G359298
GRMZM2G703415	77	18.44	137	32.8	132	31.6	seq=gene; coord=2:228318077..228324848:1	-	-	-	gi|77552592|gb|ABA95389.1|/0/retrotransposon protein, putative, unclassified, expressed [Oryza sativa (japonica cultivar-group)]	GRMZM2G703415
GRMZM2G032955	32	7.66	25	5.99	32	7.66	seq=gene; coord=6:132336106..132337091:1;IPR004895:Prenylated rab acceptor PRA1;	-	-	-	gi|226531776|ref|NP_001150209.1|/6.38687e-68/prenylated rab acceptor family protein [Zea mays]	GRMZM2G032955
AC189280.3_FG001	0	0	1	0.24	0	0	seq=gene; coord=4:170933099..170936789:1	-	-	-	gi|219888197|gb|ACL54473.1|/4.40931e-11/unknown [Zea mays]	AC189280.3_FG001
GRMZM2G124573	84	20.11	103	24.66	140	33.52	seq=gene; coord=5:125868567..125874334:1	GO:0009536//plastid	-	-	gi|226502018|ref|NP_001146928.1|/1.29361e-66/LOC100280537 [Zea mays]	GRMZM2G124573
GRMZM2G467169	250	59.86	590	141.26	476	113.96	seq=gene; coord=9:11972035..11979271:-1	-	-	-	gi|242095002|ref|XP_002437991.1|/0/hypothetical protein SORBIDRAFT_10g006020 [Sorghum bicolor]	GRMZM2G467169
GRMZM2G032071	121	28.97	235	56.26	151	36.15	seq=gene; coord=7:151194078..151200558:1;IPR005398:Tubby, N-terminal;IPR001841:Zinc finger, RING-type;IPR007087:Zinc finger, C2H2-type;IPR014977:WRC;IPR005398:Tubby, N-terminal;IPR017859:Treacher Collins Syndrome, treacle-like;IPR001841:Zinc finger, RING-type;IPR007087:Zinc finger, C2H2-type;IPR014977:WRC;	-	-	-	gi|242045958|ref|XP_002460850.1|/7.54188e-148/hypothetical protein SORBIDRAFT_02g036200 [Sorghum bicolor]	GRMZM2G032071
GRMZM2G043348	6	1.44	8	1.92	1	0.24	seq=gene; coord=5:55520035..55523822:1	-	-	-	gi|293332297|ref|NP_001170309.1|/1.5816e-141/hypothetical protein LOC100384273 [Zea mays]	GRMZM2G043348
GRMZM2G106680	76	18.2	128	30.65	61	14.6	seq=gene; coord=5:182125197..182127752:-1;IPR000533:Tropomyosin;IPR018247:EF-HAND 1;IPR002048:Calcium-binding EF-hand;IPR018247:EF-HAND 1;IPR002048:Calcium-binding EF-hand;	GO:0005739//mitochondrion;GO:0005739//mitochondrion	GO:0005509//calcium ion binding	-	gi|242065722|ref|XP_002454150.1|/3.05844e-71/hypothetical protein SORBIDRAFT_04g025540 [Sorghum bicolor]	GRMZM2G106680
GRMZM2G325038	8	1.92	13	3.11	16	3.83	seq=gene; coord=5:199445581..199446513:-1	-	-	-	gi|226507530|ref|NP_001150134.1|/3.78299e-33/transcription factor GT-3b [Zea mays]	GRMZM2G325038
GRMZM2G054833	1	0.24	0	0	2	0.48	seq=gene; coord=5:75945048..75947029:1;IPR009060:UBA-like;IPR009060:UBA-like;	-	-	-	gi|238015304|gb|ACR38687.1|/4.75844e-63/unknown [Zea mays]	GRMZM2G054833
GRMZM2G047867	9	2.15	12	2.87	27	6.46	seq=gene; coord=9:63040495..63045516:-1;IPR001045:Spermine synthase;IPR001045:Spermine synthase;	-	GO:0005515//protein binding;GO:0005515//protein binding	-	gi|224031649|gb|ACN34900.1|/0/unknown [Zea mays]	GRMZM2G047867
GRMZM2G168330	38	9.1	7	1.68	11	2.63	seq=gene; coord=7:141558464..141561377:-1;IPR002784:Ribosomal protein L14;IPR002784:Ribosomal protein L14;IPR002784:Ribosomal protein L14;	-	-	-	gi|194703236|gb|ACF85702.1|/9.20927e-69/unknown [Zea mays]	GRMZM2G168330
GRMZM2G010599	45	10.77	273	65.36	20	4.79	seq=gene; coord=10:106109133..106111058:1;IPR001854:Ribosomal protein L29;IPR001854:Ribosomal protein L29;IPR001854:Ribosomal protein L29;	-	-	-	gi|223945769|gb|ACN26968.1|/7.93871e-49/unknown [Zea mays]	GRMZM2G010599
GRMZM2G010065	18	4.31	58	13.89	2	0.48	seq=gene; coord=8:158700667..158705301:-1;IPR009053:Prefoldin;IPR004127:Prefoldin alpha-like;	-	-	-	gi|293334225|ref|NP_001169771.1|/0/hypothetical protein LOC100383656 [Zea mays]	GRMZM2G010065
GRMZM2G177915	1	0.24	3	0.72	5	1.2	seq=gene; coord=5:49206314..49206856:1;IPR002143:Ribosomal protein L1;	-	-	-	gi|242093976|ref|XP_002437478.1|/5.41229e-29/hypothetical protein SORBIDRAFT_10g027865 [Sorghum bicolor]	GRMZM2G177915
GRMZM2G405090	141	33.76	1	0.24	61	14.6	seq=gene; coord=5:27627804..27628821:1;IPR007608:Protein of unknown function DUF584;	-	-	-	gi|226498642|ref|NP_001144892.1|/6.98547e-57/hypothetical protein LOC100277997 [Zea mays]	GRMZM2G405090
AC233939.1_FG004	12	2.87	1	0.24	5	1.2	seq=gene; coord=9:134547338..134547767:-1;IPR006476:Conserved hypothetical protein CHP01589, plant	-	-	-	gi|226504314|ref|NP_001148858.1|/1.20805e-41/plant-specific domain TIGR01589 family protein [Zea mays]	AC233939.1_FG004
GRMZM2G435104	1	0.24	0	0	25	5.99	seq=gene; coord=4:148489445..148490874:-1	-	-	-	gi|238013150|gb|ACR37610.1|/8.34797e-52/unknown [Zea mays]	GRMZM2G435104
GRMZM2G173812	49	11.73	8	1.92	14	3.35	seq=gene; coord=3:14927271..14935501:-1;IPR001563:Peptidase S10, serine carboxypeptidase;IPR018202:Peptidase S10, serine carboxypeptidase, active site;	GO:0016023//cytoplasmic membrane-bounded vesicle	-	-	gi|242036353|ref|XP_002465571.1|/5.88552e-16/hypothetical protein SORBIDRAFT_01g041330 [Sorghum bicolor]	GRMZM2G173812
AC213099.3_FG002	34	8.14	8	1.92	18	4.31	seq=gene; coord=1:62975348..62978164:1;IPR007402:Protein of unknown function DUF455	-	-	-	gi|219363027|ref|NP_001136475.1|/0/hypothetical protein LOC100216588 [Zea mays]	AC213099.3_FG002
GRMZM2G166537	116	27.77	101	24.18	106	25.38	seq=gene; coord=6:12075226..12079361:-1;IPR007248:Mpv17/PMP22;	-	-	-	gi|226494642|ref|NP_001141905.1|/2.00586e-118/hypothetical protein LOC100274053 [Zea mays]	GRMZM2G166537
GRMZM2G091895	8	1.92	11	2.63	15	3.59	seq=gene; coord=4:34385209..34385780:1	-	-	-	gi|242078163|ref|XP_002443850.1|/3.43841e-25/hypothetical protein SORBIDRAFT_07g003310 [Sorghum bicolor]	GRMZM2G091895
GRMZM2G330453	23	5.51	42	10.06	27	6.46	seq=gene; coord=1:258972161..258974455:-1;IPR007603:Protein of unknown function DUF580;	-	-	-	gi|224030781|gb|ACN34466.1|/0/unknown [Zea mays]	GRMZM2G330453
GRMZM2G368758	3	0.72	7	1.68	0	0	seq=gene; coord=9:110314538..110316529:-1;IPR000104:Antifreeze protein, type I;	GO:0009536//plastid	-	-	gi|242040149|ref|XP_002467469.1|/1.33371e-101/hypothetical protein SORBIDRAFT_01g028660 [Sorghum bicolor]	GRMZM2G368758
GRMZM2G104546	88	21.07	322	77.09	128	30.65	seq=gene; coord=2:169971817..169987680:-1;IPR001412:Aminoacyl-tRNA synthetase, class I, conserved site;IPR001342:Homoserine dehydrogenase, catalytic;IPR016040:NAD(P)-binding;IPR001048:Aspartate/glutamate/uridylate kinase;IPR002912:Amino acid-binding ACT;IPR005106:Aspartate/homoserine dehydrogenase, NAD-binding;	GO:0009507//chloroplast	GO:0004072//aspartate kinase activity;GO:0050661//NADP or NADPH binding;GO:0016597//amino acid binding;GO:0004412//homoserine dehydrogenase activity	GO:0009086//methionine biosynthetic process;GO:0055114//oxidation reduction	gi|162460512|ref|NP_001105691.1|/0/aspartate kinase homoserine dehydrogenase2 precursor [Zea mays]	GRMZM2G104546
GRMZM2G133512	7	1.68	6	1.44	2	0.48	seq=gene; coord=10:72963458..72975768:-1;IPR007121:RNA polymerase, beta subunit, conserved site;IPR007644:RNA polymerase, beta subunit, protrusion;IPR007645:RNA polymerase Rpb2, domain 3;IPR007646:RNA polymerase Rpb2, domain 4;IPR007647:RNA polymerase Rpb2, domain 5;IPR007120:DNA-directed RNA polymerase, subunit 2, domain 6;IPR007641:RNA polymerase Rpb2, domain 7;	-	-	-	gi|242080725|ref|XP_002445131.1|/0/hypothetical protein SORBIDRAFT_07g004600 [Sorghum bicolor]	GRMZM2G133512
GRMZM2G064954	122	29.21	149	35.67	163	39.03	seq=gene; coord=8:159803013..159807198:1;IPR017451:F-box associated type 1;IPR001810:Cyclin-like F-box;IPR011043:Galactose oxidase/kelch, beta-propeller;	-	-	-	gi|242059713|ref|XP_002459002.1|/0/hypothetical protein SORBIDRAFT_03g044270 [Sorghum bicolor]	GRMZM2G064954
GRMZM2G099630	66	15.8	213	51	211	50.52	seq=gene; coord=5:4340591..4355851:-1;IPR001878:Zinc finger, CCHC-type;IPR017151:5'-3' exoribonuclease 2;IPR004859:Putative 5-3 exonuclease;IPR017151:5'-3' exoribonuclease 2;IPR004859:Putative 5-3 exonuclease;IPR001878:Zinc finger, CCHC-type;IPR001878:Zinc finger, CCHC-type;IPR004859:Putative 5-3 exonuclease;	-	-	-	gi|242037819|ref|XP_002466304.1|/0/hypothetical protein SORBIDRAFT_01g005340 [Sorghum bicolor]	GRMZM2G099630
GRMZM2G019284	297	71.11	128	30.65	147	35.19	seq=gene; coord=4:244583617..244586658:1	-	-	-	gi|226502076|ref|NP_001144060.1|/3.37129e-92/hypothetical protein LOC100276886 [Zea mays]	GRMZM2G019284
GRMZM2G158462	47	11.25	69	16.52	43	10.3	seq=gene; coord=1:204835819..204838220:1;IPR002343:Paraneoplastic encephalomyelitis antigen;IPR000504:RNA recognition motif, RNP-1;IPR003954:RNA recognition, region 1;	GO:0009536//plastid	GO:0005488//binding	-	gi|212274649|ref|NP_001130287.1|/3.84767e-132/hypothetical protein LOC100191381 [Zea mays]	GRMZM2G158462
GRMZM2G140299	2	0.48	2	0.48	3	0.72	seq=gene; coord=2:105284479..105285925:-1;IPR000104:Antifreeze protein, type I;IPR007087:Zinc finger, C2H2-type;IPR015880:Zinc finger, C2H2-like;	-	-	-	gi|212275123|ref|NP_001130923.1|/1.71512e-44/hypothetical protein LOC100192028 [Zea mays]	GRMZM2G140299
GRMZM2G469012	4	0.96	1	0.24	3	0.72	seq=gene; coord=8:55643885..55644965:1;IPR001932:Protein phosphatase 2C-related;IPR011009:Protein kinase-like;	-	-	-	gi|293335199|ref|NP_001170745.1|/2.45028e-122/hypothetical protein LOC100384837 [Zea mays]	GRMZM2G469012
GRMZM2G348909	97	23.22	80	19.15	119	28.49	seq=gene; coord=2:3397010..3402352:-1	-	-	-	gi|242074684|ref|XP_002447278.1|/0/hypothetical protein SORBIDRAFT_06g031840 [Sorghum bicolor]	GRMZM2G348909
GRMZM2G066749	5	1.2	10	2.39	13	3.11	seq=gene; coord=1:266973653..266976208:1;IPR002885:Pentatricopeptide repeat;	-	-	-	gi|242038361|ref|XP_002466575.1|/0/hypothetical protein SORBIDRAFT_01g010260 [Sorghum bicolor]	GRMZM2G066749
AC166636.1_FG008	3	0.72	2	0.48	1	0.24	seq=gene; coord=1:19919853..19920401:1;IPR003578:Ras small GTPase, Rho type	-	GO:0005525//GTP binding	GO:0015031//protein transport;GO:0007264//small GTPase mediated signal transduction	gi|226507380|ref|NP_001147620.1|/1.94133e-31/LOC100281229 [Zea mays]	AC166636.1_FG008
AC225193.3_FG004	0	0	2	0.48	4	0.96	seq=gene; coord=9:109550328..109551802:1;IPR000104:Antifreeze protein, type I	-	-	-	gi|242079515|ref|XP_002444526.1|/7.20212e-129/hypothetical protein SORBIDRAFT_07g023250 [Sorghum bicolor]	AC225193.3_FG004
GRMZM2G162356	176	42.14	187	44.77	138	33.04	seq=gene; coord=1:48102311..48103200:-1;IPR001841:Zinc finger, RING-type;	-	GO:0008270//zinc ion binding;GO:0005515//protein binding	-	gi|242041197|ref|XP_002467993.1|/2.32682e-51/hypothetical protein SORBIDRAFT_01g037740 [Sorghum bicolor]	GRMZM2G162356
GRMZM2G305264	168	40.22	130	31.12	191	45.73	seq=gene; coord=3:43864983..43867097:1;IPR011016:Zinc finger, RING-CH-type;IPR001841:Zinc finger, RING-type;IPR011016:Zinc finger, RING-CH-type;IPR001841:Zinc finger, RING-type;IPR011016:Zinc finger, RING-CH-type;IPR001841:Zinc finger, RING-type;	-	-	-	gi|293334891|ref|NP_001169469.1|/3.00385e-169/hypothetical protein LOC100383341 [Zea mays]	GRMZM2G305264
GRMZM2G046058	0	0	1	0.24	0	0	seq=gene; coord=5:195312649..195314436:-1;IPR002885:Pentatricopeptide repeat;	GO:0009536//plastid	-	-	gi|242062936|ref|XP_002452757.1|/0/hypothetical protein SORBIDRAFT_04g031880 [Sorghum bicolor]	GRMZM2G046058
GRMZM2G010136	31	7.42	73	17.48	136	32.56	seq=gene; coord=2:213536403..213540929:-1;IPR002189:F-actin capping protein, alpha subunit;IPR017865:F-actin capping protein, alpha subunit, conserved site;IPR018315:F-actin capping protein, alpha subunit, actin binding;IPR002189:F-actin capping protein, alpha subunit;IPR017865:F-actin capping protein, alpha subunit, conserved site;IPR018315:F-actin capping protein, alpha subunit, actin binding;I…	-	-	-	gi|226496105|ref|NP_001151489.1|/2.21977e-161/F-actin capping protein alpha subunit [Zea mays]	GRMZM2G010136
GRMZM2G107089	15	3.59	69	16.52	86	20.59	seq=gene; coord=7:7341034..7346385:1;IPR002316:Prolyl-tRNA synthetase, class IIa, conserved region;IPR004499:Prolyl-tRNA synthetase, class IIa, prokaryotic-type;IPR004154:Anticodon-binding;IPR017449:Prolyl-tRNA synthetase, class II;IPR002314:Aminoacyl-tRNA synthetase, class II (G, H, P and S), conserved region;IPR016061:Prolyl-tRNA synthetase, class II, C-terminal;IPR002316:Prolyl-tRNA synthetase…	GO:0005737//cytoplasm;GO:0005737//cytoplasm	GO:0004827//proline-tRNA ligase activity;GO:0005524//ATP binding;GO:0004827//proline-tRNA ligase activity;GO:0005524//ATP binding	GO:0006433//prolyl-tRNA aminoacylation;GO:0006433//prolyl-tRNA aminoacylation	gi|226494879|ref|NP_001149927.1|/0/prolyl-tRNA synthetase [Zea mays]	GRMZM2G107089
GRMZM2G388674	0	0	1	0.24	0	0	seq=gene; coord=8:34482212..34483373:-1	-	-	-	gi|226494560|ref|NP_001142740.1|/1.22778e-39/hypothetical protein LOC100275082 [Zea mays]	GRMZM2G388674
GRMZM2G060762	24	5.75	25	5.99	20	4.79	seq=gene; coord=7:154686600..154694988:1;IPR016196:Major facilitator superfamily, general substrate transporter;	GO:0016020//membrane	-	-	gi|212724072|ref|NP_001132176.1|/0/hypothetical protein LOC100193601 [Zea mays]	GRMZM2G060762
GRMZM2G147814	28	6.7	7	1.68	19	4.55	seq=gene; coord=5:7816624..7818809:-1;IPR015877:Cdk-activating kinase assembly factor, MAT1;IPR015877:Cdk-activating kinase assembly factor, MAT1;	GO:0005739//mitochondrion;GO:0005739//mitochondrion	GO:0005515//protein binding;GO:0005515//protein binding	-	gi|226528533|ref|NP_001150873.1|/1.58954e-53/CDK-activating kinase assembly factor MAT1 family protein [Zea mays]	GRMZM2G147814
GRMZM2G079365	85	20.35	104	24.9	75	17.96	seq=gene; coord=4:218951259..218967433:1;IPR004827:Basic-leucine zipper (bZIP) transcription factor;IPR011700:Basic leucine zipper;IPR011616:bZIP transcription factor, bZIP-1;	-	-	-	gi|226499778|ref|NP_001141497.1|/1.29739e-133/hypothetical protein LOC100273609 [Zea mays]	GRMZM2G079365
GRMZM2G096184	95	22.75	133	31.84	128	30.65	seq=gene; coord=9:31009971..31022118:-1;IPR016024:Armadillo-type fold;IPR016024:Armadillo-type fold;	-	-	-	gi|218197914|gb|EEC80341.1|/0/hypothetical protein OsI_22413 [Oryza sativa Indica Group]	GRMZM2G096184
GRMZM2G069061	364	87.15	501	119.95	333	79.73	seq=gene; coord=3:200351209..200359966:-1	GO:0005739//mitochondrion	-	-	gi|212721050|ref|NP_001131270.1|/3.67382e-84/hypothetical protein LOC100192583 [Zea mays]	GRMZM2G069061
GRMZM2G177510	0	0	1	0.24	0	0	seq=gene; coord=4:106893985..106897940:-1;IPR000169:Peptidase, cysteine peptidase active site;IPR017853:Glycoside hydrolase, catalytic core;IPR000490:Glycoside hydrolase, family 17;	-	-	-	gi|242061828|ref|XP_002452203.1|/9.17355e-178/hypothetical protein SORBIDRAFT_04g021700 [Sorghum bicolor]	GRMZM2G177510
GRMZM2G141216	38	9.1	68	16.28	1	0.24	seq=gene; coord=8:16743131..16746641:1;IPR011016:Zinc finger, RING-CH-type;IPR001841:Zinc finger, RING-type;IPR017907:Zinc finger, RING-type, conserved site;IPR017907:Zinc finger, RING-type, conserved site;IPR001841:Zinc finger, RING-type;	GO:0016020//membrane;GO:0016020//membrane	-	-	gi|226495651|ref|NP_001149464.1|/0/zinc finger, C3HC4 type family protein [Zea mays]	GRMZM2G141216
GRMZM2G100955	21	5.03	20	4.79	41	9.82	seq=gene; coord=6:87455724..87459383:1	-	-	-	gi|238011170|gb|ACR36620.1|/5.76196e-76/unknown [Zea mays]	GRMZM2G100955
GRMZM2G700759	0	0	1	0.24	1	0.24	seq=gene; coord=8:162608459..162612686:1	-	GO:0005515//protein binding;GO:0005515//protein binding;GO:0005515//protein binding	-	gi|293331911|ref|NP_001169575.1|/0/hypothetical protein LOC100383455 [Zea mays]	GRMZM2G700759
GRMZM2G088921	3	0.72	0	0	0	0	seq=gene; coord=5:211183403..211187248:1;IPR015905:Isoleucyl-tRNA synthetase, class Ia, N-terminal;IPR009080:Aminoacyl-tRNA synthetase, class 1a, anticodon-binding;IPR013155:Valyl/Leucyl/Isoleucyl-tRNA synthetase, class I, anticodon-binding;	GO:0005737//cytoplasm	GO:0005524//ATP binding;GO:0004822//isoleucine-tRNA ligase activity	GO:0006428//isoleucyl-tRNA aminoacylation	gi|218191678|gb|EEC74105.1|/5.36679e-180/hypothetical protein OsI_09155 [Oryza sativa Indica Group]	GRMZM2G088921
GRMZM2G388081	0	0	6	1.44	3	0.72	seq=gene; coord=3:219773796..219775498:-1	-	-	-	gi|226499398|ref|NP_001145975.1|/2.24673e-46/hypothetical protein LOC100279502 [Zea mays]	GRMZM2G388081
GRMZM2G025592	90	21.55	457	109.41	1171	280.36	seq=gene; coord=10:141826364..141834118:-1;IPR001525:C-5 cytosine-specific DNA methylase;IPR017984:Chromo domain subgroup;IPR018117:C-5 cytosine-specific DNA methylase, active site;IPR001025:Bromo adjacent region;IPR000953:Chromo domain;	GO:0000785//chromatin;GO:0005634//nucleus	GO:0003677//DNA binding;GO:0003886//DNA (cytosine-5-)-methyltransferase activity;GO:0003682//chromatin binding	GO:0016568//chromatin modification;GO:0006355//regulation of transcription, DNA-dependent;GO:0006333//chromatin assembly or disassembly;GO:0006306//DNA methylation	gi|162463785|ref|NP_001104978.1|/0/DNA cytosine methyltransferase MET2a [Zea mays]	GRMZM2G025592
GRMZM2G701144	7	1.68	10	2.39	7	1.68	seq=gene; coord=6:137444260..137445267:-1	-	-	-	gi|219886037|gb|ACL53393.1|/1.70312e-32/unknown [Zea mays]	GRMZM2G701144
GRMZM2G518764	3	0.72	7	1.68	10	2.39	seq=gene; coord=5:91096713..91097318:-1	-	-	-	-	GRMZM2G518764
GRMZM2G333623	5	1.2	6	1.44	5	1.2	seq=gene; coord=3:13477634..13483720:1	-	-	-	gi|242056273|ref|XP_002457282.1|/3.05078e-96/hypothetical protein SORBIDRAFT_03g004810 [Sorghum bicolor]	GRMZM2G333623
GRMZM2G308860	20	4.79	12	2.87	1	0.24	seq=gene; coord=4:3904173..3908590:-1;IPR001984:Peptidase S16, Lon protease, C-terminal region;IPR017871:ABC transporter, conserved site;IPR003593:ATPase, AAA+ type, core;IPR003439:ABC transporter-like;IPR013525:ABC-2 type transporter;IPR003593:ATPase, AAA+ type, core;IPR017871:ABC transporter, conserved site;IPR003439:ABC transporter-like;	GO:0009536//plastid;GO:0009536//plastid	-	-	gi|242072059|ref|XP_002451306.1|/0/hypothetical protein SORBIDRAFT_05g027420 [Sorghum bicolor]	GRMZM2G308860
GRMZM2G026780	6	1.44	9	2.15	3	0.72	seq=gene; coord=1:269868436..269869436:-1	-	-	-	gi|226507749|ref|NP_001142527.1|/1.47165e-35/hypothetical protein LOC100274767 [Zea mays]	GRMZM2G026780
GRMZM2G088166	3	0.72	0	0	9	2.15	seq=gene; coord=1:60099821..60100376:1	-	-	-	-	GRMZM2G088166
GRMZM2G071294	35	8.38	34	8.14	43	10.3	seq=gene; coord=7:9788849..9791162:-1;IPR004821:Cytidyltransferase-related;IPR004820:Cytidylyltransferase;	-	-	-	gi|226532536|ref|NP_001148945.1|/2.50432e-100/LOC100282565 [Zea mays]	GRMZM2G071294
GRMZM2G113202	133	31.84	164	39.26	97	23.22	seq=gene; coord=1:228528771..228544620:-1;IPR001609:Myosin head, motor region;IPR003593:ATPase, AAA+ type, core;IPR000048:IQ calmodulin-binding region;	-	-	-	gi|242039303|ref|XP_002467046.1|/0/hypothetical protein SORBIDRAFT_01g018770 [Sorghum bicolor]	GRMZM2G113202
GRMZM2G025855	80	19.15	70	16.76	73	17.48	seq=gene; coord=1:221939142..221942842:-1;IPR005712:Ribosomal protein S5, bacterial-type;IPR018192:Ribosomal protein S5, N-terminal, conserved site;IPR013810:Ribosomal protein S5, N-terminal;IPR005324:Ribosomal protein S5, C-terminal;	GO:0009536//plastid	-	-	gi|224028929|gb|ACN33540.1|/5.74599e-140/unknown [Zea mays]	GRMZM2G025855
GRMZM2G462046	0	0	2	0.48	0	0	seq=gene; coord=6:122693935..122695279:1	-	-	-	gi|195608174|gb|ACG25917.1|/2.28841e-13/hypothetical protein [Zea mays]	GRMZM2G462046
GRMZM2G137312	160	38.31	117	28.01	80	19.15	seq=gene; coord=1:6509562..6513387:-1;IPR008698:NADH-ubiquinone oxidoreductase B18 subunit;	GO:0005739//mitochondrion	GO:0008137//NADH dehydrogenase (ubiquinone) activity	-	gi|226492353|ref|NP_001149798.1|/1.38172e-48/NADH-ubiquinone oxidoreductase B18 subunit [Zea mays]	GRMZM2G137312
GRMZM2G377161	2	0.48	4	0.96	11	2.63	seq=gene; coord=4:162476276..162480275:1;IPR008700:Defence response, Rin4;	-	-	-	gi|242062680|ref|XP_002452629.1|/2.12255e-34/hypothetical protein SORBIDRAFT_04g029410 [Sorghum bicolor]	GRMZM2G377161
GRMZM2G030567	2	0.48	1	0.24	1	0.24	seq=gene; coord=1:3710480..3715397:1	-	-	-	gi|242042481|ref|XP_002468635.1|/1.34485e-84/hypothetical protein SORBIDRAFT_01g049390 [Sorghum bicolor]	GRMZM2G030567
GRMZM2G014276	27	6.46	41	9.82	44	10.53	seq=gene; coord=2:13246711..13252894:1;IPR001680:WD40 repeat;IPR011046:WD40 repeat-like;IPR013934:Small-subunit processome, Utp13;IPR001680:WD40 repeat;IPR011046:WD40 repeat-like;	-	-	-	gi|242076996|ref|XP_002448434.1|/0/hypothetical protein SORBIDRAFT_06g027070 [Sorghum bicolor]	GRMZM2G014276
GRMZM2G078204	317	75.9	125	29.93	534	127.85	seq=gene; coord=5:18170896..18179025:-1;IPR017961:DNA polymerase, Y-family, little finger domain;IPR001126:DNA-repair protein, UmuC-like;	-	-	-	gi|242038847|ref|XP_002466818.1|/0/hypothetical protein SORBIDRAFT_01g014630 [Sorghum bicolor]	GRMZM2G078204
GRMZM2G044576	0	0	3	0.72	1	0.24	seq=gene; coord=8:173491931..173493784:-1;IPR000679:Zinc finger, GATA-type;	-	-	-	gi|242058659|ref|XP_002458475.1|/2.70108e-103/hypothetical protein SORBIDRAFT_03g034360 [Sorghum bicolor]	GRMZM2G044576
GRMZM2G163296	114	27.29	3	0.72	75	17.96	seq=gene; coord=1:282261871..282263912:-1;IPR010471:Protein of unknown function DUF1068;	-	-	-	gi|226501070|ref|NP_001144072.1|/5.81578e-58/hypothetical protein LOC100276901 [Zea mays]	GRMZM2G163296
GRMZM2G179024	27	6.46	54	12.93	82	19.63	seq=gene; coord=7:137538236..137543869:-1;IPR011006:CheY-like;IPR001789:Signal transduction response regulator, receiver region;IPR010402:CCT domain;	-	-	-	gi|226497556|ref|NP_001141486.1|/0/hypothetical protein LOC100273598 [Zea mays]	GRMZM2G179024
GRMZM2G172695	28	6.7	17	4.07	26	6.22	seq=gene; coord=2:100476694..100478992:1;IPR007700:Protein of unknown function DUF668;	-	-	-	gi|242064142|ref|XP_002453360.1|/1.83468e-179/hypothetical protein SORBIDRAFT_04g004600 [Sorghum bicolor]	GRMZM2G172695
GRMZM2G016875	102	24.42	222	53.15	192	45.97	seq=gene; coord=1:254318546..254326572:1;IPR001451:Bacterial transferase hexapeptide repeat;	-	GO:0016779//nucleotidyltransferase activity	-	gi|195635397|gb|ACG37167.1|/4.13298e-51/translation initiation factor eIF-2B gamma subunit [Zea mays]	GRMZM2G016875
GRMZM2G145775	243	58.18	111	26.58	101	24.18	seq=gene; coord=2:2104773..2107332:1	-	-	-	gi|226510333|ref|NP_001143649.1|/2.17016e-92/hypothetical protein LOC100276371 [Zea mays]	GRMZM2G145775
GRMZM2G127481	88	21.07	133	31.84	101	24.18	seq=gene; coord=2:1072501..1082008:1;IPR008685:Centromere protein Mis12;IPR008685:Centromere protein Mis12;	-	-	-	gi|226507771|ref|NP_001148642.1|/4.18335e-109/LOC100282258 [Zea mays]	GRMZM2G127481
GRMZM2G408174	77	18.44	143	34.24	84	20.11	seq=gene; coord=9:7654917..7655678:-1	-	-	-	gi|212720837|ref|NP_001132845.1|/6.96578e-39/hypothetical protein LOC100194337 [Zea mays]	GRMZM2G408174
GRMZM2G103452	25	5.99	56	13.41	3	0.72	seq=gene; coord=2:159640605..159646757:-1	-	GO:0005488//binding	-	gi|255671267|dbj|BAF10121.2|/1.52035e-35/Os02g0762800 [Oryza sativa Japonica Group]	GRMZM2G103452
GRMZM2G026189	3	0.72	0	0	0	0	seq=gene; coord=7:2524882..2526597:1;IPR008280:Tubulin/FtsZ, C-terminal;IPR002182:NB-ARC;	-	-	-	gi|195609952|gb|ACG26806.1|/0/hypothetical protein [Zea mays]	GRMZM2G026189
GRMZM2G163539	1	0.24	0	0	0	0	seq=gene; coord=5:142118995..142119793:1;IPR011016:Zinc finger, RING-CH-type;IPR001841:Zinc finger, RING-type;	-	-	-	gi|226510205|ref|NP_001146951.1|/1.92025e-66/RING-H2 finger protein ATL5H [Zea mays]	GRMZM2G163539
GRMZM2G109429	445	106.55	378	90.5	519	124.26	seq=gene; coord=3:166854578..166857720:-1;IPR014912:Sep15/SelM redox;IPR014912:Sep15/SelM redox;	GO:0016023//cytoplasmic membrane-bounded vesicle;GO:0016023//cytoplasmic membrane-bounded vesicle	-	-	gi|224033123|gb|ACN35637.1|/2.27359e-92/unknown [Zea mays]	GRMZM2G109429
GRMZM2G101245	14	3.35	49	11.73	9	2.15	seq=gene; coord=1:207686003..207688573:1;IPR001245:Tyrosine protein kinase;IPR002290:Serine/threonine protein kinase;IPR008271:Serine/threonine protein kinase, active site;IPR011009:Protein kinase-like;IPR017442:Serine/threonine protein kinase-related;	GO:0009536//plastid	-	-	gi|212276193|ref|NP_001130591.1|/0/hypothetical protein LOC100191690 [Zea mays]	GRMZM2G101245
GRMZM2G168920	87	20.83	195	46.69	133	31.84	seq=gene; coord=5:52063727..52066835:1;IPR007087:Zinc finger, C2H2-type;IPR003604:Zinc finger, U1-type;IPR015880:Zinc finger, C2H2-like;	-	-	-	gi|226533026|ref|NP_001151247.1|/7.65028e-60/LOC100284880 [Zea mays]	GRMZM2G168920
GRMZM2G159768	0	0	3	0.72	0	0	seq=gene; coord=9:139341925..139342572:-1	-	-	-	-	GRMZM2G159768
GRMZM2G066400	26	6.23	113	27.05	133	31.84	seq=gene; coord=6:9179882..9183906:-1	-	-	-	gi|242080459|ref|XP_002444998.1|/0/hypothetical protein SORBIDRAFT_07g002540 [Sorghum bicolor]	GRMZM2G066400
GRMZM2G146573	3	0.72	5	1.2	15	3.59	seq=gene; coord=9:98712511..98713213:1;IPR000104:Antifreeze protein, type I;IPR003058:Cloacin;	-	-	-	-	GRMZM2G146573
GRMZM2G023110	250	59.86	162	38.79	155	37.11	seq=gene; coord=1:266933329..266936849:-1;IPR001245:Tyrosine protein kinase;IPR017441:Protein kinase, ATP binding site;IPR002016:Haem peroxidase, plant/fungal/bacterial;IPR002290:Serine/threonine protein kinase;IPR011009:Protein kinase-like;IPR013210:Leucine-rich repeat, N-terminal;IPR001611:Leucine-rich repeat;IPR017442:Serine/threonine protein kinase-related;	-	GO:0004872//receptor activity;GO:0005515//protein binding;GO:0004672//protein kinase activity;GO:0005524//ATP binding	GO:0006468//protein amino acid phosphorylation	gi|162459881|ref|NP_001105207.1|/0/atypical receptor-like kinase MARK [Zea mays]	GRMZM2G023110
GRMZM2G425236	8	1.92	16	3.83	9	2.15	seq=gene; coord=5:10166832..10168034:-1;IPR000047:Helix-turn-helix motif, lambda-like repressor;IPR006456:ZF-HD homeobox protein Cys/His-rich dimerisation region;IPR006455:Homeobox domain, ZF-HD class;	-	-	-	gi|226529707|ref|NP_001151696.1|/1.1886e-77/ZF-HD protein dimerisation region containing protein [Zea mays]	GRMZM2G425236
AC212112.4_FG002	3	0.72	1	0.24	8	1.92	seq=gene; coord=5:205110426..205115894:-1;IPR001940:Peptidase S1C, HrtA/DegP2/Q/S	-	-	-	gi|242062556|ref|XP_002452567.1|/0/hypothetical protein SORBIDRAFT_04g028270 [Sorghum bicolor]	AC212112.4_FG002
GRMZM2G165788	0	0	2	0.48	1	0.24	seq=gene; coord=3:59975555..59979605:-1;IPR001932:Protein phosphatase 2C-related;	-	-	-	gi|219887567|gb|ACL54158.1|/5.05547e-84/unknown [Zea mays]	GRMZM2G165788
GRMZM2G455075	0	0	3	0.72	0	0	seq=gene; coord=7:145582058..145583943:1;IPR002213:UDP-glucuronosyl/UDP-glucosyltransferase;	-	-	-	gi|195611832|gb|ACG27746.1|/0/anthocyanidin 5,3-O-glucosyltransferase [Zea mays]	GRMZM2G455075
GRMZM2G178603	98	23.46	28	6.7	21	5.03	seq=gene; coord=5:187802284..187803405:-1;IPR000104:Antifreeze protein, type I;IPR005333:Transcription factor, TCP;	GO:0016020//membrane	-	-	gi|242062422|ref|XP_002452500.1|/4.89948e-38/hypothetical protein SORBIDRAFT_04g026970 [Sorghum bicolor]	GRMZM2G178603
GRMZM2G083518	37	8.86	94	22.51	148	35.43	seq=gene; coord=3:9602369..9607496:-1;IPR010989:t-SNARE;IPR006011:Syntaxin, N-terminal;IPR000727:Target SNARE coiled-coil region;IPR006012:Syntaxin/epimorphin, conserved site;	-	-	GO:0009987//cellular process;GO:0006810//transport	gi|212724026|ref|NP_001131203.1|/1.00316e-158/hypothetical protein LOC100192511 [Zea mays]	GRMZM2G083518
GRMZM2G030144	101	24.18	169	40.46	200	47.88	seq=gene; coord=9:15936151..15946262:-1;IPR008152:Clathrin adaptor, alpha/beta/gamma-adaptin, appendage, Ig-like subdomain;IPR017107:Adaptor protein complex AP-1, gamma subunit;IPR016024:Armadillo-type fold;IPR013041:Clathrin/coatomer adaptor, adaptin-like, appendage, Ig-like subdomain;IPR002553:Clathrin/coatomer adaptor, adaptin-like, N-terminal;IPR017107:Adaptor protein complex AP-1, gamma subu…	-	GO:0005515//protein binding;GO:0005515//protein binding;GO:0005515//protein binding	-	gi|195613856|gb|ACG28758.1|/0/AP-1 complex subunit gamma-1 [Zea mays]	GRMZM2G030144
GRMZM2G098015	27	6.46	12	2.87	27	6.46	seq=gene; coord=8:8730778..8732028:1;IPR003072:Orphan nuclear receptor, NOR1 type;	-	-	-	gi|293331999|ref|NP_001168345.1|/8.44167e-74/hypothetical protein LOC100382113 [Zea mays]	GRMZM2G098015
GRMZM2G458538	164	39.27	292	69.91	267	63.93	seq=gene; coord=6:166995212..166998308:-1;IPR012419:Cas1p-like;	GO:0016020//membrane;GO:0016023//cytoplasmic membrane-bounded vesicle	-	-	gi|242088987|ref|XP_002440326.1|/0/hypothetical protein SORBIDRAFT_09g029750 [Sorghum bicolor]	GRMZM2G458538
GRMZM2G148198	44	10.53	29	6.94	25	5.99	seq=gene; coord=2:54467071..54469498:-1;IPR003121:SWIB/MDM2;	-	-	-	gi|226504436|ref|NP_001147217.1|/6.78478e-41/SWIb domain-containing protein [Zea mays]	GRMZM2G148198
AC234528.1_FG005	0	0	1	0.24	1	0.24	seq=gene; coord=1:203714477..203719133:-1;IPR004404:Dihydroxy-acid dehydratase	GO:0009536//plastid	-	GO:0008152//metabolic process	gi|226508194|ref|NP_001141560.1|/0/hypothetical protein LOC100273676 [Zea mays]	AC234528.1_FG005
GRMZM2G149326	6	1.44	0	0	0	0	seq=gene; coord=8:73581844..73583999:1	-	-	-	gi|212721744|ref|NP_001132326.1|/2.06744e-55/hypothetical protein LOC100193768 [Zea mays]	GRMZM2G149326
GRMZM2G164878	123	29.45	140	33.52	149	35.67	seq=gene; coord=1:201866446..201871139:-1;IPR013048:Meiotic recombination Spo11;IPR013048:Meiotic recombination Spo11;	-	-	-	gi|115477875|ref|NP_001062533.1|/0/Os08g0564800 [Oryza sativa (japonica cultivar-group)]	GRMZM2G164878
GRMZM2G023982	7	1.68	0	0	2	0.48	seq=gene; coord=5:20881098..20882329:1	-	-	-	gi|18542172|gb|AAL75481.1|AF466202_7/4.71652e-26/putative TNP2 [Zea mays]	GRMZM2G023982
GRMZM2G701684	3	0.72	0	0	1	0.24	seq=gene; coord=5:81084094..81086268:-1	-	-	-	gi|195641434|gb|ACG40185.1|/8.21359e-154/hypothetical protein [Zea mays]	GRMZM2G701684
GRMZM2G003992	19	4.55	92	22.03	34	8.14	seq=gene; coord=2:186341209..186344406:-1;IPR000533:Tropomyosin;	GO:0009536//plastid	-	-	gi|226498794|ref|NP_001145770.1|/0/hypothetical protein LOC100279277 [Zea mays]	GRMZM2G003992
AC208422.3_FG001	0	0	0	0	1	0.24	seq=gene; coord=2:146223407..146224319:-1	-	-	-	gi|218186362|gb|EEC68789.1|/5.89644e-27/hypothetical protein OsI_37334 [Oryza sativa Indica Group]	AC208422.3_FG001
GRMZM2G125294	395	94.57	453	108.46	634	151.79	seq=gene; coord=8:67396001..67407877:1;IPR009057:Homeodomain-like;IPR001356:Homeobox;IPR018500:DDT subgroup;IPR004022:DDT family;IPR018500:DDT subgroup;IPR004022:DDT family;	-	-	-	gi|222632557|gb|EEE64689.1|/0/hypothetical protein OsJ_19544 [Oryza sativa Japonica Group]	GRMZM2G125294
GRMZM2G037469	31	7.42	21	5.03	33	7.9	seq=gene; coord=3:207571169..207575363:1;IPR005027:Glycosyl transferase, family 43;	GO:0016020//membrane	GO:0015018//galactosylgalactosylxylosylprotein 3-beta-glucuronosyltransferase activity	-	gi|226495037|ref|NP_001151473.1|/0/galactosylgalactosylxylosylprotein 3-beta-glucuronosyltransferase 1 [Zea mays]	GRMZM2G037469
GRMZM2G128421	6	1.44	41	9.82	25	5.99	seq=gene; coord=5:17228447..17229880:1;IPR003311:AUX/IAA protein;IPR003311:AUX/IAA protein;IPR003311:AUX/IAA protein;	GO:0043231//intracellular membrane-bounded organelle	-	GO:0010468//regulation of gene expression;GO:0010556;GO:0031326;GO:0034961;GO:0044238//primary metabolic process	gi|219887105|gb|ACL53927.1|/2.05683e-50/unknown [Zea mays]	GRMZM2G128421
GRMZM2G007587	32	7.66	27	6.46	32	7.66	seq=gene; coord=4:36352670..36354834:-1;IPR006651:Kelch;IPR011043:Galactose oxidase/kelch, beta-propeller;IPR001810:Cyclin-like F-box;IPR006652:Kelch repeat type 1;IPR011498:Kelch repeat type 2;IPR006651:Kelch;IPR001810:Cyclin-like F-box;IPR006652:Kelch repeat type 1;IPR011043:Galactose oxidase/kelch, beta-propeller;IPR011498:Kelch repeat type 2;	-	-	-	gi|212721260|ref|NP_001131732.1|/0/hypothetical protein LOC100193097 [Zea mays]	GRMZM2G007587
GRMZM2G043584	342	81.88	339	81.16	561	134.31	seq=gene; coord=1:30305084..30309037:1;IPR001245:Tyrosine protein kinase;IPR011009:Protein kinase-like;IPR017441:Protein kinase, ATP binding site;IPR008271:Serine/threonine protein kinase, active site;IPR003591:Leucine-rich repeat, typical subtype;IPR002290:Serine/threonine protein kinase;IPR013210:Leucine-rich repeat, N-terminal;IPR001611:Leucine-rich repeat;IPR017442:Serine/threonine protein ki…	GO:0016023//cytoplasmic membrane-bounded vesicle	-	-	gi|115451705|ref|NP_001049453.1|/0/Os03g0228800 [Oryza sativa (japonica cultivar-group)]	GRMZM2G043584
GRMZM2G009421	0	0	0	0	8	1.92	seq=gene; coord=1:119023483..119026301:-1	-	-	-	gi|195656515|gb|ACG47725.1|/1.06223e-22/hypothetical protein [Zea mays]	GRMZM2G009421
GRMZM2G041238	223	53.39	1495	357.93	1614	386.42	seq=gene; coord=8:13611470..13612455:1;IPR005825:Ribosomal protein L24/L26, conserved site;IPR005824:KOW;IPR005756:Ribosomal protein L26, eukaryotic/archaeal;IPR008991:Translation protein SH3-like;	-	-	-	gi|238011054|gb|ACR36562.1|/2.63123e-64/unknown [Zea mays]	GRMZM2G041238
GRMZM2G029566	237	56.74	286	68.47	245	58.66	seq=gene; coord=4:238822409..238827571:1;IPR005959:Fumarylacetoacetase;IPR011234:Fumarylacetoacetase, C-terminal-related;IPR015377:Fumarylacetoacetase, N-terminal;IPR002529:Fumarylacetoacetase, C-terminal-like;IPR003006:Immunoglobulin/major histocompatibility complex, conserved site;IPR005959:Fumarylacetoacetase;IPR011234:Fumarylacetoacetase, C-terminal-related;IPR015377:Fumarylacetoacetase, N-te…	GO:0016023//cytoplasmic membrane-bounded vesicle	GO:0016798//hydrolase activity, acting on glycosyl bonds	-	gi|226502274|ref|NP_001141808.1|/0/hypothetical protein LOC100273946 [Zea mays]	GRMZM2G029566
GRMZM2G028041	110	26.34	221	52.91	498	119.23	seq=gene; coord=7:3670339..3676532:1;IPR000047:Helix-turn-helix motif, lambda-like repressor;IPR017970:Homeobox, conserved site;IPR001356:Homeobox;IPR009057:Homeodomain-like;IPR005540:KNOX1;IPR005541:KNOX2;IPR005539:ELK;	GO:0005634//nucleus	GO:0043565//sequence-specific DNA binding;GO:0005515//protein binding;GO:0003700//transcription factor activity	GO:0006355//regulation of transcription, DNA-dependent	gi|194688564|gb|ACF78366.1|/4.82857e-132/unknown [Zea mays]	GRMZM2G028041
GRMZM2G144707	38	9.1	1	0.24	1	0.24	seq=gene; coord=8:154676979..154678267:-1;IPR004345:TB2/DP1 and HVA22 related protein;	GO:0016020//membrane	-	-	gi|242058573|ref|XP_002458432.1|/7.88684e-76/hypothetical protein SORBIDRAFT_03g033470 [Sorghum bicolor]	GRMZM2G144707
GRMZM2G122139	14	3.35	44	10.53	24	5.75	seq=gene; coord=1:281689777..281707160:-1;IPR008380:HAD-superfamily hydrolase, subfamily IG, 5'-nucleotidase;IPR016695:Purine 5'-nucleotidase;IPR000104:Antifreeze protein, type I;IPR000814:TATA-box binding;IPR000104:Antifreeze protein, type I;	GO:0005739//mitochondrion;GO:0005739//mitochondrion;GO:0005739//mitochondrion	-	-	gi|226532413|ref|NP_001151027.1|/5.0262e-63/cytosolic purine 5-nucleotidase [Zea mays]	GRMZM2G122139
GRMZM2G008819	0	0	0	0	2	0.48	seq=gene; coord=4:178879058..178880132:-1;IPR008972:Cupredoxin;IPR003245:Plastocyanin-like;	GO:0016023//cytoplasmic membrane-bounded vesicle	-	-	gi|293333579|ref|NP_001168456.1|/8.8672e-64/hypothetical protein LOC100382230 [Zea mays]	GRMZM2G008819
GRMZM2G087850	193	46.21	158	37.83	101	24.18	seq=gene; coord=6:91888386..91894679:-1;IPR000462:CDP-alcohol phosphatidyltransferase;IPR014387:CDP-diacylglycerol-inositol 3-phosphatidyltransferase, eukaryote;IPR000462:CDP-alcohol phosphatidyltransferase;IPR014387:CDP-diacylglycerol-inositol 3-phosphatidyltransferase, eukaryote;IPR014387:CDP-diacylglycerol-inositol 3-phosphatidyltransferase, eukaryote;IPR000462:CDP-alcohol phosphatidyltransfer…	GO:0016023//cytoplasmic membrane-bounded vesicle;GO:0016020//membrane;GO:0016023//cytoplasmic membrane-bounded vesicle;GO:0016020//membrane;GO:0016023//cytoplasmic membrane-bounded vesicle;GO:0016020//membrane;GO:0016023//cytoplasmic membrane-bounded vesicle;GO:0016020//membrane;GO:0016023//cytoplasmic membrane-bounded vesicle;GO:0016020//membrane;GO:0016023//cytoplasmic membrane-bounded vesicle;…	GO:0016780//phosphotransferase activity, for other substituted phosphate groups;GO:0016780//phosphotransferase activity, for other substituted phosphate groups;GO:0016780//phosphotransferase activity, for other substituted phosphate groups;GO:0016780//phosphotransferase activity, for other substituted phosphate groups;GO:0016780//phosphotransferase activity, for other substituted phosphate groups…	GO:0008654//phospholipid biosynthetic process;GO:0008654//phospholipid biosynthetic process;GO:0008654//phospholipid biosynthetic process;GO:0008654//phospholipid biosynthetic process;GO:0008654//phospholipid biosynthetic process;GO:0008654//phospholipid biosynthetic process	gi|167860166|ref|NP_001108118.1|/1.55411e-109/phosphatidylinositol synthase 2 [Zea mays]	GRMZM2G087850
GRMZM2G071325	0	0	2	0.48	0	0	seq=gene; coord=5:195574597..195576467:-1;IPR011059:Metal-dependent hydrolase, composite;IPR006740:Protein of unknown function DUF604;	-	-	-	gi|242062928|ref|XP_002452753.1|/0/hypothetical protein SORBIDRAFT_04g031800 [Sorghum bicolor]	GRMZM2G071325
GRMZM2G074850	369	88.35	279	66.8	135	32.32	seq=gene; coord=6:67638572..67640495:1;IPR016040:NAD(P)-binding;IPR001509:NAD-dependent epimerase/dehydratase;	GO:0005622//intracellular	GO:0008446//GDP-mannose 4,6-dehydratase activity;GO:0050662//coenzyme binding	GO:0019673//GDP-mannose metabolic process	gi|226509148|ref|NP_001149057.1|/1.21931e-158/GDP-mannose 4,6 dehydratase 2 [Zea mays]	GRMZM2G074850
GRMZM2G069316	384	91.94	91	21.79	201	48.12	seq=gene; coord=5:95178680..95182212:1	-	-	-	gi|195653651|gb|ACG46293.1|/8.79883e-33/hypothetical protein [Zea mays]	GRMZM2G069316
GRMZM2G365423	10	2.39	15	3.59	10	2.39	seq=gene; coord=4:73175756..73182843:1;IPR001341:Aspartate kinase region;IPR001048:Aspartate/glutamate/uridylate kinase;IPR018042:Aspartate kinase, conserved site;	GO:0009507//chloroplast	GO:0004072//aspartate kinase activity;GO:0050661//NADP or NADPH binding;GO:0016597//amino acid binding;GO:0004412//homoserine dehydrogenase activity	GO:0009086//methionine biosynthetic process;GO:0055114//oxidation reduction	gi|224029995|gb|ACN34073.1|/0/unknown [Zea mays]	GRMZM2G365423
GRMZM2G021313	1	0.24	2	0.48	1	0.24	seq=gene; coord=5:1100541..1105552:-1	-	-	-	gi|242037427|ref|XP_002466108.1|/2.77431e-164/hypothetical protein SORBIDRAFT_01g001380 [Sorghum bicolor]	GRMZM2G021313
GRMZM2G102605	118	28.25	810	193.93	622	148.92	seq=gene; coord=6:164990952..164994330:1;IPR008892:Cold acclimation WCOR413;IPR008892:Cold acclimation WCOR413;	GO:0009536//plastid;GO:0016020//membrane;GO:0009536//plastid;GO:0016020//membrane;GO:0009536//plastid;GO:0016020//membrane	-	-	gi|219885013|gb|ACL52881.1|/1.07798e-70/unknown [Zea mays]	GRMZM2G102605
GRMZM2G181273	115	27.53	255	61.05	163	39.03	seq=gene; coord=5:197727634..197731931:1;IPR002933:Peptidase M20;IPR011650:Peptidase M20, dimerisation;IPR002933:Peptidase M20;IPR011650:Peptidase M20, dimerisation;	-	GO:0016787//hydrolase activity	-	gi|226491976|ref|NP_001149829.1|/0/LOC100283456 [Zea mays]	GRMZM2G181273
GRMZM2G123499	11	2.63	44	10.53	43	10.3	seq=gene; coord=3:1764243..1773099:-1;IPR018205:VHS subgroup;IPR008942:ENTH/VHS;	-	GO:0005515//protein binding;GO:0005515//protein binding	-	gi|242055841|ref|XP_002457066.1|/0/hypothetical protein SORBIDRAFT_03g000740 [Sorghum bicolor]	GRMZM2G123499
GRMZM2G010372	1	0.24	0	0	0	0	seq=gene; coord=4:245847663..245849775:1;IPR000620:Protein of unknown function DUF6, transmembrane;	GO:0005887//integral to plasma membrane;GO:0016023//cytoplasmic membrane-bounded vesicle;GO:0005938//cell cortex;GO:0005739//mitochondrion	-	GO:0006810//transport;GO:0009734//auxin mediated signaling pathway	gi|212722740|ref|NP_001132593.1|/2.37527e-20/hypothetical protein LOC100194065 [Zea mays]	GRMZM2G010372
GRMZM2G469523	918	219.79	585	140.06	981	234.87	seq=gene; coord=1:219493368..219495243:1;IPR008089:Nucleotide sugar epimerase;IPR016040:NAD(P)-binding;IPR008089:Nucleotide sugar epimerase;IPR016040:NAD(P)-binding;	-	-	-	gi|195639520|gb|ACG39228.1|/1.96053e-103/UDP-glucose 4-epimerase GEPI48 [Zea mays]	GRMZM2G469523
GRMZM2G034835	1	0.24	0	0	5	1.2	seq=gene; coord=9:142119278..142121646:1;IPR000743:Glycoside hydrolase, family 28;IPR006626:Parallel beta-helix repeat;IPR011050:Pectin lyase fold/virulence factor;	GO:0016023//cytoplasmic membrane-bounded vesicle	-	-	gi|219886807|gb|ACL53778.1|/0/unknown [Zea mays]	GRMZM2G034835
GRMZM2G118014	90	21.55	71	17	59	14.13	seq=gene; coord=1:295928049..295934046:-1;IPR004882:LUC7 related;IPR004882:LUC7 related;IPR004882:LUC7 related;IPR004882:LUC7 related;IPR004882:LUC7 related;	-	-	-	gi|226533514|ref|NP_001149200.1|/5.62767e-143/LOC100282822 [Zea mays]	GRMZM2G118014
GRMZM2G082260	17	4.07	90	21.55	75	17.96	seq=gene; coord=3:179004581..179011238:1;IPR001900:Ribonuclease II and R;IPR001900:Ribonuclease II and R;IPR001900:Ribonuclease II and R;	-	-	-	gi|242059199|ref|XP_002458745.1|/4.68832e-124/hypothetical protein SORBIDRAFT_03g039500 [Sorghum bicolor]	GRMZM2G082260
GRMZM2G111113	0	0	2	0.48	0	0	seq=gene; coord=3:220325269..220327580:1;IPR002885:Pentatricopeptide repeat;	-	-	-	gi|242051555|ref|XP_002454923.1|/0/hypothetical protein SORBIDRAFT_03g001460 [Sorghum bicolor]	GRMZM2G111113
GRMZM2G092152	144	34.48	166	39.74	372	89.06	seq=gene; coord=3:207317316..207320253:-1;IPR014878:Region of unknown function DUF1794;	-	-	-	gi|226503922|ref|NP_001148838.1|/2.06859e-85/THAP domain-containing protein 4 [Zea mays]	GRMZM2G092152
GRMZM2G082976	264	63.21	278	66.56	142	34	seq=gene; coord=5:923899..928546:1;IPR001046:Natural resistance-associated macrophage protein;IPR007599:Der1-like;	GO:0016021//integral to membrane;GO:0005789//endoplasmic reticulum membrane	-	GO:0006950//response to stress	gi|162463819|ref|NP_001105798.1|/1.65118e-133/derlin-2.1 [Zea mays]	GRMZM2G082976
GRMZM2G428035	44	10.53	8	1.92	43	10.3	seq=gene; coord=4:195074147..195115939:1;IPR001245:Tyrosine protein kinase;IPR011009:Protein kinase-like;IPR017442:Serine/threonine protein kinase-related;IPR008271:Serine/threonine protein kinase, active site;IPR002290:Serine/threonine protein kinase;IPR001245:Tyrosine protein kinase;IPR011009:Protein kinase-like;IPR017442:Serine/threonine protein kinase-related;IPR002290:Serine/threonine protei…	-	-	-	gi|222615747|gb|EEE51879.1|/9.495e-134/hypothetical protein OsJ_33427 [Oryza sativa Japonica Group]	GRMZM2G428035
GRMZM2G079904	59	14.13	360	86.19	5	1.2	seq=gene; coord=3:199499840..199507012:-1;IPR001680:WD40 repeat;IPR011046:WD40 repeat-like;	-	GO:0005515//protein binding	-	gi|242054261|ref|XP_002456276.1|/0/hypothetical protein SORBIDRAFT_03g033340 [Sorghum bicolor]	GRMZM2G079904
GRMZM2G414601	1	0.24	6	1.44	10	2.39	seq=gene; coord=3:170146875..170149095:1	-	-	-	gi|226494644|ref|NP_001142907.1|/2.00599e-30/hypothetical protein LOC100275338 [Zea mays]	GRMZM2G414601
GRMZM2G477879	1	0.24	2	0.48	1	0.24	seq=gene; coord=1:268947885..268950107:1;IPR016024:Armadillo-type fold;IPR000357:HEAT;	-	-	-	gi|242038321|ref|XP_002466555.1|/4.55782e-176/hypothetical protein SORBIDRAFT_01g009860 [Sorghum bicolor]	GRMZM2G477879
GRMZM2G063824	28	6.7	31	7.42	7	1.68	seq=gene; coord=1:131039498..131041236:1;IPR003663:Sugar/inositol transporter;IPR016196:Major facilitator superfamily, general substrate transporter;IPR005828:General substrate transporter;IPR011701:Major facilitator superfamily MFS-1;IPR005829:Sugar transporter, conserved site;	GO:0016020//membrane	GO:0005351//sugar:hydrogen symporter activity	GO:0008643//carbohydrate transport	gi|226491229|ref|NP_001151390.1|/0/carbohydrate transporter/ sugar porter [Zea mays]	GRMZM2G063824
GRMZM2G020766	17	4.07	20	4.79	21	5.03	seq=gene; coord=7:166540989..166552187:-1;IPR018519:Potassium uptake protein, kup;IPR003855:K+ potassium transporter;	GO:0016020//membrane	GO:0015079//potassium ion transmembrane transporter activity	GO:0006813//potassium ion transport	gi|242051242|ref|XP_002463365.1|/0/hypothetical protein SORBIDRAFT_02g042430 [Sorghum bicolor]	GRMZM2G020766
GRMZM2G161452	51	12.21	55	13.17	43	10.3	seq=gene; coord=1:38178475..38182357:1;IPR001245:Tyrosine protein kinase;IPR017441:Protein kinase, ATP binding site;IPR008271:Serine/threonine protein kinase, active site;IPR002290:Serine/threonine protein kinase;IPR011009:Protein kinase-like;IPR017442:Serine/threonine protein kinase-related;IPR011009:Protein kinase-like;	-	-	-	gi|226529139|ref|NP_001142074.1|/0/hypothetical protein LOC100274231 [Zea mays]	GRMZM2G161452
GRMZM2G410757	2	0.48	2	0.48	2	0.48	seq=gene; coord=6:15002340..15003245:-1	-	-	-	gi|242086767|ref|XP_002439216.1|/5.65009e-28/hypothetical protein SORBIDRAFT_09g002380 [Sorghum bicolor]	GRMZM2G410757
AC200881.4_FG004	3	0.72	5	1.2	4	0.96	seq=gene; coord=1:216931711..216934190:1;IPR011046:WD40 repeat-like	-	-	-	gi|239047736|ref|NP_001142007.2|/1.23026e-179/hypothetical protein LOC100274157 [Zea mays]	AC200881.4_FG004
AC212579.3_FG002	0	0	1	0.24	0	0	seq=gene; coord=5:76567662..76568697:1	-	-	-	gi|212275205|ref|NP_001130735.1|/1.98715e-09/hypothetical protein LOC100191839 [Zea mays]	AC212579.3_FG002
GRMZM2G157505	25	5.99	24	5.75	26	6.22	seq=gene; coord=7:158772467..158773310:1	-	-	-	gi|226491892|ref|NP_001152610.1|/1.36874e-25/EGG APPARATUS-1 protein [Zea mays]	GRMZM2G157505
GRMZM2G171507	41	9.82	8	1.92	216	51.71	seq=gene; coord=9:87446052..87458373:-1	-	GO:0005515//protein binding;GO:0005524//ATP binding;GO:0004674//protein serine/threonine kinase activity;GO:0005515//protein binding;GO:0005524//ATP binding;GO:0004674//protein serine/threonine kinase activity;GO:0005515//protein binding;GO:0005524//ATP binding;GO:0004674//protein serine/threonine kinase activity;GO:0005515//protein binding;GO:0005524//ATP binding;GO:0004674//protein serine/threo…	GO:0006468//protein amino acid phosphorylation;GO:0007165//signal transduction;GO:0006468//protein amino acid phosphorylation;GO:0007165//signal transduction;GO:0006468//protein amino acid phosphorylation;GO:0007165//signal transduction;GO:0006468//protein amino acid phosphorylation;GO:0007165//signal transduction	gi|212720797|ref|NP_001132150.1|/2.02772e-132/hypothetical protein LOC100193569 [Zea mays]	GRMZM2G171507
GRMZM2G124644	4	0.96	7	1.68	4	0.96	seq=gene; coord=4:12914620..12915955:1;IPR001623:Heat shock protein DnaJ, N-terminal;	-	-	-	gi|226500672|ref|NP_001148857.1|/1.19612e-106/LOC100282476 [Zea mays]	GRMZM2G124644
GRMZM2G348551	46	11.01	115	27.53	64	15.32	seq=gene; coord=6:113380769..113385825:1;IPR016160:Aldehyde dehydrogenase, conserved site;IPR011835:Glycogen/starch synthases, ADP-glucose type;IPR013534:Starch synthase catalytic region;IPR001296:Glycosyl transferase, group 1;	-	GO:0016740//transferase activity	-	gi|5825480|gb|AAD53263.1|AF155217_1/0/starch synthase IIA [Triticum aestivum]	GRMZM2G348551
GRMZM2G090217	485	116.12	304	72.78	221	52.91	seq=gene; coord=1:250457714..250472421:1;IPR001680:WD40 repeat;IPR011046:WD40 repeat-like;IPR001680:WD40 repeat;IPR011046:WD40 repeat-like;	-	GO:0005515//protein binding;GO:0005515//protein binding;GO:0005515//protein binding	-	gi|162458007|ref|NP_001105556.1|/3.65797e-86/MSI type nucleosome/chromatin assembly factor C [Zea mays]	GRMZM2G090217
GRMZM2G125138	49	11.73	40	9.58	30	7.18	seq=gene; coord=6:5160002..5164210:-1	-	-	-	gi|212722396|ref|NP_001132458.1|/9.87377e-175/hypothetical protein LOC100193914 [Zea mays]	GRMZM2G125138
GRMZM2G163507	13	3.11	8	1.92	38	9.1	seq=gene; coord=3:133634240..133636794:1;IPR002273:Lutropin-choriogonadotropic hormone receptor;	-	-	-	gi|242085180|ref|XP_002443015.1|/0/hypothetical protein SORBIDRAFT_08g006355 [Sorghum bicolor]	GRMZM2G163507
GRMZM2G169259	1	0.24	0	0	4	0.96	seq=gene; coord=8:166714573..166716945:-1	-	-	-	gi|219885703|gb|ACL53226.1|/1.19938e-177/unknown [Zea mays]	GRMZM2G169259
GRMZM2G704349	0	0	1	0.24	2	0.48	seq=gene; coord=7:9076428..9080409:1	-	-	-	-	GRMZM2G704349
GRMZM2G063737	14	3.35	32	7.66	34	8.14	seq=gene; coord=8:173263655..173268800:1;IPR001401:Dynamin, GTPase region;	-	-	-	gi|242058673|ref|XP_002458482.1|/0/hypothetical protein SORBIDRAFT_03g034500 [Sorghum bicolor]	GRMZM2G063737
GRMZM2G039263	425	101.76	401	96.01	372	89.06	seq=gene; coord=4:173992519..173997991:-1;IPR017998:Chaperone, tailless complex polypeptide 1;IPR001844:Chaperonin Cpn60;IPR012715:T-complex protein 1, alpha subunit;IPR002423:Chaperonin Cpn60/TCP-1;IPR002194:Chaperonin TCP-1, conserved site;IPR017998:Chaperone, tailless complex polypeptide 1;IPR001844:Chaperonin Cpn60;IPR003842:Vacuolating cytotoxin;IPR012715:T-complex protein 1, alpha subunit;I…	GO:0005737//cytoplasm;GO:0005737//cytoplasm	GO:0051082//unfolded protein binding;GO:0005524//ATP binding;GO:0051082//unfolded protein binding;GO:0005524//ATP binding	GO:0006457//protein folding;GO:0006457//protein folding	gi|226507822|ref|NP_001150087.1|/0/LOC100283716 [Zea mays]	GRMZM2G039263
GRMZM2G703457	14	3.35	18	4.31	15	3.59	seq=gene; coord=9:13845072..13848381:1	-	-	-	-	GRMZM2G703457
GRMZM2G332821	6	1.44	3	0.72	11	2.63	seq=gene; coord=1:171986284..171988908:1;IPR001245:Tyrosine protein kinase;IPR017441:Protein kinase, ATP binding site;IPR008271:Serine/threonine protein kinase, active site;IPR002290:Serine/threonine protein kinase;IPR011009:Protein kinase-like;IPR002902:Protein of unknown function DUF26;IPR017442:Serine/threonine protein kinase-related;	-	-	-	gi|242093356|ref|XP_002437168.1|/0/hypothetical protein SORBIDRAFT_10g022290 [Sorghum bicolor]	GRMZM2G332821
GRMZM2G073498	586	140.3	318	76.13	83	19.87	seq=gene; coord=9:142737331..142741464:-1;IPR002208:SecY protein;IPR002208:SecY protein;IPR002208:SecY protein;IPR002208:SecY protein;	-	GO:0015450//P-P-bond-hydrolysis-driven protein transmembrane transporter activity;GO:0015450//P-P-bond-hydrolysis-driven protein transmembrane transporter activity;GO:0015450//P-P-bond-hydrolysis-driven protein transmembrane transporter activity	GO:0009306//protein secretion;GO:0009306//protein secretion;GO:0009306//protein secretion	gi|219887481|gb|ACL54115.1|/0/unknown [Zea mays]	GRMZM2G073498
GRMZM2G066578	9	2.15	5	1.2	4	0.96	seq=gene; coord=5:29218552..29226374:1;IPR006694:Fatty acid hydroxylase;IPR006694:Fatty acid hydroxylase;	GO:0043668//exine;GO:0005783//endoplasmic reticulum;GO:0043668//exine;GO:0005783//endoplasmic reticulum	-	GO:0010025//wax biosynthetic process;GO:0010143//cutin biosynthetic process;GO:0048653//anther development;GO:0010025//wax biosynthetic process;GO:0010143//cutin biosynthetic process;GO:0048653//anther development	gi|226506068|ref|NP_001146661.1|/0/hypothetical protein LOC100280261 [Zea mays]	GRMZM2G066578
GRMZM2G032332	20	4.79	3	0.72	67	16.04	seq=gene; coord=6:13567016..13578512:-1;IPR000047:Helix-turn-helix motif, lambda-like repressor;IPR017970:Homeobox, conserved site;IPR001356:Homeobox;IPR009057:Homeodomain-like;IPR005540:KNOX1;IPR005541:KNOX2;IPR005539:ELK;IPR005540:KNOX1;IPR005541:KNOX2;	GO:0005634//nucleus;GO:0005634//nucleus	GO:0043565//sequence-specific DNA binding;GO:0003700//transcription factor activity;GO:0043565//sequence-specific DNA binding;GO:0003700//transcription factor activity	GO:0006355//regulation of transcription, DNA-dependent;GO:0006355//regulation of transcription, DNA-dependent	gi|195627526|gb|ACG35593.1|/2.60251e-137/homeotic protein knotted-1 [Zea mays]	GRMZM2G032332
GRMZM2G701204	6	1.44	1	0.24	3	0.72	seq=gene; coord=6:154463569..154469099:-1	-	-	-	gi|242090875|ref|XP_002441270.1|/1.72984e-60/hypothetical protein SORBIDRAFT_09g023540 [Sorghum bicolor]	GRMZM2G701204
GRMZM2G378452	36	8.62	39	9.34	45	10.77	seq=gene; coord=3:23488234..23491816:-1;IPR001245:Tyrosine protein kinase;IPR000104:Antifreeze protein, type I;IPR011009:Protein kinase-like;IPR017442:Serine/threonine protein kinase-related;IPR008271:Serine/threonine protein kinase, active site;IPR002290:Serine/threonine protein kinase;IPR011009:Protein kinase-like;IPR001245:Tyrosine protein kinase;IPR008271:Serine/threonine protein kinase, acti…	-	-	-	gi|212275640|ref|NP_001130823.1|/0/hypothetical protein LOC100191927 [Zea mays]	GRMZM2G378452
GRMZM2G159481	5	1.2	1	0.24	0	0	seq=gene; coord=2:51159501..51161520:1	-	-	-	gi|238014102|gb|ACR38086.1|/1.9275e-06/unknown [Zea mays]	GRMZM2G159481
GRMZM2G077054	51	12.21	21	5.03	9	2.15	seq=gene; coord=8:149895033..149906176:-1;IPR000759:Adrenodoxin reductase;IPR013027:FAD-dependent pyridine nucleotide-disulphide oxidoreductase;IPR000103:Pyridine nucleotide-disulphide oxidoreductase, class-II;IPR000960:Flavin-containing monooxygenase FMO;IPR006005:Glutamate synthase, NADH/NADPH, small subunit 1;IPR012220:Glutamate synthase, eukaryotic;IPR002489:Glutamate synthase, alpha subunit,…	-	-	-	gi|242058361|ref|XP_002458326.1|/0/hypothetical protein SORBIDRAFT_03g031310 [Sorghum bicolor]	GRMZM2G077054
GRMZM2G164335	0	0	2	0.48	2	0.48	seq=gene; coord=4:202719454..202720982:-1;IPR006766:Phosphate-induced protein 1 conserved region;	GO:0016023//cytoplasmic membrane-bounded vesicle	-	-	gi|293334411|ref|NP_001169340.1|/2.87014e-143/hypothetical protein LOC100383207 [Zea mays]	GRMZM2G164335
GRMZM2G416750	21	5.03	71	17	33	7.9	seq=gene; coord=6:109347456..109348832:-1;IPR011016:Zinc finger, RING-CH-type;IPR001841:Zinc finger, RING-type;	-	-	-	gi|242092278|ref|XP_002436629.1|/2.05887e-92/hypothetical protein SORBIDRAFT_10g006200 [Sorghum bicolor]	GRMZM2G416750
GRMZM2G132000	1101	263.61	1332	318.9	1030	246.6	seq=gene; coord=2:142232053..142235744:-1;IPR000626:Ubiquitin;IPR000626:Ubiquitin;IPR000626:Ubiquitin;	-	-	-	gi|115487294|ref|NP_001066134.1|/2.49755e-37/Os12g0143100 [Oryza sativa (japonica cultivar-group)]	GRMZM2G132000
GRMZM2G108368	1	0.24	2	0.48	6	1.44	seq=gene; coord=1:238747294..238748138:1	-	GO:0003677//DNA binding	GO:0006334//nucleosome assembly	gi|219362481|ref|NP_001136523.1|/4.55389e-45/hypothetical protein LOC100216638 [Zea mays]	GRMZM2G108368
GRMZM2G092129	168	40.22	289	69.19	273	65.36	seq=gene; coord=7:36378539..36393238:1;IPR000008:C2 calcium-dependent membrane targeting;IPR008973:C2 calcium/lipid-binding region, CaLB;IPR008973:C2 calcium/lipid-binding region, CaLB;IPR000008:C2 calcium-dependent membrane targeting;	GO:0016020//membrane;GO:0016020//membrane	-	-	gi|293330971|ref|NP_001170442.1|/0/hypothetical protein LOC100384434 [Zea mays]	GRMZM2G092129
GRMZM2G459896	0	0	12	2.87	0	0	seq=gene; coord=2:75346711..75352795:-1	GO:0005739//mitochondrion;GO:0009536//plastid	GO:0004357//glutamate-cysteine ligase activity	GO:0006750//glutathione biosynthetic process	gi|255537467|ref|XP_002509800.1|/3.36979e-20/Glutamate--cysteine ligase, chloroplast precursor, putative [Ricinus communis]	GRMZM2G459896
GRMZM2G144818	222	53.15	57	13.65	67	16.04	seq=gene; coord=9:109975363..109982166:-1;IPR007523:Protein of unknown function DUF498;	GO:0005739//mitochondrion	-	-	gi|242040131|ref|XP_002467460.1|/3.88002e-92/hypothetical protein SORBIDRAFT_01g028480 [Sorghum bicolor]	GRMZM2G144818
GRMZM2G109680	13	3.11	56	13.41	78	18.67	seq=gene; coord=4:234547380..234551135:-1	GO:0005739//mitochondrion;GO:0009536//plastid;GO:0005739//mitochondrion;GO:0009536//plastid;GO:0005739//mitochondrion;GO:0009536//plastid	-	-	gi|219363647|ref|NP_001136450.1|/6.09564e-32/hypothetical protein LOC100216558 [Zea mays]	GRMZM2G109680
GRMZM2G095873	12	2.87	16	3.83	7	1.68	seq=gene; coord=4:207723685..207726160:1;IPR001841:Zinc finger, RING-type;	-	-	-	gi|226497808|ref|NP_001151286.1|/2.34489e-73/protein binding protein [Zea mays]	GRMZM2G095873
AC196125.3_FG002	251	60.1	321	76.85	396	94.81	seq=gene; coord=1:295085374..295086573:1;IPR003954:RNA recognition, region 1	-	GO:0008270//zinc ion binding;GO:0003676//nucleic acid binding;GO:0000166//nucleotide binding	-	gi|238014210|gb|ACR38140.1|/9.76137e-44/unknown [Zea mays]	AC196125.3_FG002
GRMZM2G303525	15	3.59	16	3.83	19	4.55	seq=gene; coord=2:214867959..214870821:1;IPR001623:Heat shock protein DnaJ, N-terminal;IPR001440:Tetratricopeptide TPR-1;IPR013105:Tetratricopeptide TPR2;IPR013026:Tetratricopeptide region;	GO:0005739//mitochondrion	-	-	gi|242047024|ref|XP_002461258.1|/0/hypothetical protein SORBIDRAFT_02g043740 [Sorghum bicolor]	GRMZM2G303525
GRMZM2G022987	36	8.62	47	11.25	74	17.72	seq=gene; coord=4:236937160..236949957:-1;IPR017890:Transcription elongation factor S-IIM;IPR003618:Transcription elongation factor S-II, central region;IPR012921:Spen paralogue and orthologue C-terminal;	-	-	-	gi|242060932|ref|XP_002451755.1|/0/hypothetical protein SORBIDRAFT_04g007300 [Sorghum bicolor]	GRMZM2G022987
GRMZM2G080652	75	17.96	61	14.6	39	9.34	seq=gene; coord=1:183753967..183757883:-1;IPR000555:Mov34/MPN/PAD-1;	GO:0009536//plastid	GO:0005515//protein binding	-	gi|226490811|ref|NP_001151056.1|/2.49719e-150/COP9 signalosome complex subunit 6a [Zea mays]	GRMZM2G080652
GRMZM2G037350	0	0	1	0.24	6	1.44	seq=gene; coord=8:127134190..127136699:-1;IPR001680:WD40 repeat;IPR011044:Quinoprotein amine dehydrogenase, beta chain-like;IPR001680:WD40 repeat;IPR011044:Quinoprotein amine dehydrogenase, beta chain-like;	-	-	-	gi|223973163|gb|ACN30769.1|/8.79445e-94/unknown [Zea mays]	GRMZM2G037350
GRMZM2G145504	72	17.24	92	22.03	120	28.73	seq=gene; coord=5:215708647..215710533:-1;IPR002885:Pentatricopeptide repeat;	GO:0005739//mitochondrion	-	-	gi|226501132|ref|NP_001144243.1|/0/hypothetical protein LOC100277111 [Zea mays]	GRMZM2G145504
GRMZM2G034471	29	6.94	39	9.34	101	24.18	seq=gene; coord=2:192123069..192125451:1;IPR002401:Cytochrome P450, E-class, group I;IPR002403:Cytochrome P450, E-class, group IV;IPR002397:Cytochrome P450, B-class;IPR017973:Cytochrome P450, C-terminal region;IPR017972:Cytochrome P450, conserved site;IPR001128:Cytochrome P450;	-	GO:0005515//protein binding	-	gi|242049930|ref|XP_002462709.1|/0/hypothetical protein SORBIDRAFT_02g030640 [Sorghum bicolor]	GRMZM2G034471
GRMZM2G427672	21	5.03	38	9.1	37	8.86	seq=gene; coord=7:41834131..41845211:-1;IPR004087:K Homology;IPR018111:K Homology, type 1, subgroup;IPR018111:K Homology, type 1, subgroup;IPR004087:K Homology;IPR004087:K Homology;IPR018111:K Homology, type 1, subgroup;	-	-	-	gi|242048332|ref|XP_002461912.1|/0/hypothetical protein SORBIDRAFT_02g010550 [Sorghum bicolor]	GRMZM2G427672
GRMZM2G113950	215	51.48	223	53.39	227	54.35	seq=gene; coord=4:169335065..169339485:-1;IPR003441:No apical meristem (NAM) protein;	-	-	-	gi|223949493|gb|ACN28830.1|/0/unknown [Zea mays]	GRMZM2G113950
GRMZM2G312817	11	2.63	4	0.96	12	2.87	seq=gene; coord=6:109667601..109670261:-1;IPR001055:Adrenodoxin;IPR001041:Ferredoxin;IPR018298:Adrenodoxin, iron-sulphur binding site;IPR001055:Adrenodoxin;IPR018298:Adrenodoxin, iron-sulphur binding site;IPR001041:Ferredoxin;	GO:0005739//mitochondrion;GO:0009507//chloroplast;GO:0005739//mitochondrion	GO:0051920//peroxiredoxin activity	GO:0045454//cell redox homeostasis;GO:0055114//oxidation reduction	gi|242095034|ref|XP_002438007.1|/1.64141e-68/hypothetical protein SORBIDRAFT_10g006400 [Sorghum bicolor]	GRMZM2G312817
GRMZM2G146475	67	16.04	1	0.24	0	0	seq=gene; coord=3:145588551..145589607:1;IPR005442:Glutathione S-transferase, omega-class;IPR010987:Glutathione S-transferase, C-terminal-like;IPR012336:Thioredoxin-like fold;IPR004045:Glutathione S-transferase, N-terminal;IPR004046:Glutathione S-transferase, C-terminal;	-	GO:0016740//transferase activity	-	gi|195641012|gb|ACG39974.1|/6.00406e-114/glutathione S-transferase [Zea mays]	GRMZM2G146475
GRMZM2G075683	69	16.52	91	21.79	111	26.58	seq=gene; coord=5:185296081..185303387:1;IPR017441:Protein kinase, ATP binding site;IPR008271:Serine/threonine protein kinase, active site;IPR001245:Tyrosine protein kinase;IPR002290:Serine/threonine protein kinase;IPR011009:Protein kinase-like;IPR017442:Serine/threonine protein kinase-related;IPR008271:Serine/threonine protein kinase, active site;IPR002290:Serine/threonine protein kinase;IPR0110…	GO:0005634//nucleus;GO:0005634//nucleus;GO:0005634//nucleus	-	GO:0009826//unidimensional cell growth;GO:0048364//root development;GO:0009741//response to brassinosteroid stimulus;GO:0009850//auxin metabolic process;GO:0009826//unidimensional cell growth;GO:0048364//root development;GO:0009741//response to brassinosteroid stimulus;GO:0009850//auxin metabolic process;GO:0009826//unidimensional cell growth;GO:0048364//root development;GO:0009741//response to b…	gi|219362843|ref|NP_001137014.1|/0/hypothetical protein LOC100217181 [Zea mays]	GRMZM2G075683
GRMZM2G465091	289	69.19	81	19.39	493	118.03	seq=gene; coord=10:131654810..131655854:1;IPR005333:Transcription factor, TCP;	-	-	-	gi|242073764|ref|XP_002446818.1|/1.80162e-39/hypothetical protein SORBIDRAFT_06g023130 [Sorghum bicolor]	GRMZM2G465091
GRMZM2G144742	27	6.46	81	19.39	75	17.96	seq=gene; coord=4:135043392..135047831:-1	GO:0009536//plastid;GO:0009536//plastid;GO:0009536//plastid;GO:0009536//plastid;GO:0009536//plastid;GO:0009536//plastid;GO:0009536//plastid	-	-	gi|242062284|ref|XP_002452431.1|/8.9966e-22/hypothetical protein SORBIDRAFT_04g025690 [Sorghum bicolor]	GRMZM2G144742
GRMZM2G084498	74	17.72	88	21.07	29	6.94	seq=gene; coord=4:177843508..177844342:1	-	-	-	gi|226531606|ref|NP_001145673.1|/3.20117e-43/hypothetical protein LOC100279175 [Zea mays]	GRMZM2G084498
GRMZM2G024898	18	4.31	8	1.92	16	3.83	seq=gene; coord=2:12699966..12704308:-1;IPR000023:Phosphofructokinase;IPR003657:DNA-binding WRKY;	-	-	-	gi|242074190|ref|XP_002447031.1|/0/hypothetical protein SORBIDRAFT_06g027290 [Sorghum bicolor]	GRMZM2G024898
GRMZM2G000593	7	1.68	6	1.44	8	1.92	seq=gene; coord=3:214907800..214911783:-1	GO:0016020//membrane;GO:0016020//membrane;GO:0016020//membrane;GO:0016020//membrane;GO:0016020//membrane	-	-	gi|293332615|ref|NP_001170118.1|/9.20346e-63/hypothetical protein LOC100384039 [Zea mays]	GRMZM2G000593
GRMZM2G475482	1	0.24	1	0.24	0	0	seq=gene; coord=2:77782727..77784718:-1;IPR001133:NADH-ubiquinone oxidoreductase, chain 4L;	GO:0016023//cytoplasmic membrane-bounded vesicle;GO:0005747//mitochondrial respiratory chain complex I	GO:0016651//oxidoreductase activity, acting on NADH or NADPH	GO:0022900//electron transport chain	gi|94502667|ref|YP_588279.1|/4.2059e-47/hypothetical protein ZeamMp013 [Zea mays subsp. mays]	GRMZM2G475482
GRMZM2G026558	31	7.42	92	22.03	79	18.91	seq=gene; coord=2:23761010..23763160:1;IPR000735:Adrenergic receptor, alpha-2C;IPR017859:Treacher Collins Syndrome, treacle-like;IPR003072:Orphan nuclear receptor, NOR1 type;	-	-	-	gi|242076560|ref|XP_002448216.1|/0/hypothetical protein SORBIDRAFT_06g023300 [Sorghum bicolor]	GRMZM2G026558
GRMZM2G104538	656	157.06	764	182.91	675	161.61	seq=gene; coord=2:2483218..2485065:-1;IPR000374:Phosphatidate cytidylyltransferase;IPR000374:Phosphatidate cytidylyltransferase;	GO:0016021//integral to membrane;GO:0009507//chloroplast;GO:0016020//membrane;GO:0009536//plastid;GO:0016021//integral to membrane;GO:0009507//chloroplast;GO:0016021//integral to membrane;GO:0009507//chloroplast;GO:0016020//membrane;GO:0009536//plastid	GO:0016301//kinase activity;GO:0016301//kinase activity;GO:0016301//kinase activity;GO:0016772//transferase activity, transferring phosphorus-containing groups	-	gi|162464255|ref|NP_001105847.1|/9.67998e-90/probable phytol kinase, chloroplastic precursor [Zea mays]	GRMZM2G104538
GRMZM2G106204	353	84.52	69	16.52	39	9.34	seq=gene; coord=7:6207937..6221255:1;IPR009071:High mobility group, superfamily;IPR006780:YABBY protein;IPR009071:High mobility group, superfamily;IPR006780:YABBY protein;	GO:0005634//nucleus;GO:0005634//nucleus	-	GO:0048833//specification of floral organ number;GO:0048833//specification of floral organ number	gi|226500754|ref|NP_001149388.1|/1.16197e-92/LOC100283014 [Zea mays]	GRMZM2G106204
GRMZM2G171122	13	3.11	141	33.76	285	68.23	seq=gene; coord=8:4234871..4239392:-1	-	-	-	gi|242052527|ref|XP_002455409.1|/1.59377e-70/hypothetical protein SORBIDRAFT_03g010300 [Sorghum bicolor]	GRMZM2G171122
GRMZM2G091320	17	4.07	0	0	0	0	seq=gene; coord=1:229048087..229051818:1	-	-	-	gi|242034137|ref|XP_002464463.1|/8.65448e-55/hypothetical protein SORBIDRAFT_01g018880 [Sorghum bicolor]	GRMZM2G091320
GRMZM2G007453	78	18.68	35	8.38	30	7.18	seq=gene; coord=2:9939239..9945774:-1;IPR014044:SCP-like extracellular;IPR014044:SCP-like extracellular;IPR014044:SCP-like extracellular;IPR014044:SCP-like extracellular;	-	-	-	gi|293333533|ref|NP_001169188.1|/0/hypothetical protein LOC100383040 [Zea mays]	GRMZM2G007453
GRMZM2G138077	50	11.97	180	43.09	70	16.76	seq=gene; coord=3:125335290..125337548:-1	-	-	-	gi|212722172|ref|NP_001131548.1|/4.98536e-102/hypothetical protein LOC100192888 [Zea mays]	GRMZM2G138077
GRMZM2G144873	44	10.53	262	62.73	285	68.23	seq=gene; coord=6:4804226..4808741:-1;IPR002659:Glycosyl transferase, family 31;IPR006058:2Fe-2S ferredoxin, iron-sulphur binding site;IPR006058:2Fe-2S ferredoxin, iron-sulphur binding site;IPR002659:Glycosyl transferase, family 31;IPR002659:Glycosyl transferase, family 31;IPR006058:2Fe-2S ferredoxin, iron-sulphur binding site;IPR002659:Glycosyl transferase, family 31;IPR006058:2Fe-2S ferredoxin,…	-	-	-	gi|194702464|gb|ACF85316.1|/0/unknown [Zea mays]	GRMZM2G144873
GRMZM2G066080	167	39.98	216	51.71	206	49.32	seq=gene; coord=10:97999854..98021000:1;IPR005479:Carbamoyl phosphate synthetase, large subunit, ATP-binding;IPR011054:Rudiment single hybrid motif;IPR016185:PreATP-grasp-like fold;IPR011053:Single hybrid motif;IPR005481:Carbamoyl phosphate synthase, large subunit, N-terminal;IPR005482:Biotin carboxylase, C-terminal;IPR000089:Biotin/lipoyl attachment;IPR013537:Acetyl-CoA carboxylase, central regi…	-	GO:0009374//biotin binding;GO:0003989//acetyl-CoA carboxylase activity;GO:0005524//ATP binding;GO:0009374//biotin binding;GO:0003989//acetyl-CoA carboxylase activity;GO:0005524//ATP binding;GO:0009374//biotin binding;GO:0003989//acetyl-CoA carboxylase activity;GO:0005524//ATP binding;GO:0009374//biotin binding;GO:0003989//acetyl-CoA carboxylase activity;GO:0005524//ATP binding;GO:0009374//biotin …	GO:0006633//fatty acid biosynthetic process;GO:0006633//fatty acid biosynthetic process;GO:0006633//fatty acid biosynthetic process;GO:0006633//fatty acid biosynthetic process;GO:0006633//fatty acid biosynthetic process;GO:0006633//fatty acid biosynthetic process	gi|162461024|ref|NP_001105373.1|/0/acetyl-coenzyme A carboxylase [Zea mays]	GRMZM2G066080
GRMZM2G153087	4	0.96	6	1.44	14	3.35	seq=gene; coord=3:132191853..132197163:-1;IPR004052:Potassium channel, voltage dependent, Kv1.5;IPR011011:Zinc finger, FYVE/PHD-type;IPR001965:Zinc finger, PHD-type;	-	GO:0003677//DNA binding;GO:0003677//DNA binding	GO:0006355//regulation of transcription, DNA-dependent;GO:0006355//regulation of transcription, DNA-dependent	gi|223944727|gb|ACN26447.1|/1.56073e-116/unknown [Zea mays]	GRMZM2G153087
GRMZM2G419994	16	3.83	58	13.89	38	9.1	seq=gene; coord=4:242515225..242516716:-1	-	-	-	gi|226529485|ref|NP_001146118.1|/4.49699e-64/hypothetical protein LOC100279659 [Zea mays]	GRMZM2G419994
GRMZM2G128215	11	2.63	0	0	21	5.03	seq=gene; coord=8:164293348..164295669:1;IPR001810:Cyclin-like F-box;IPR001810:Cyclin-like F-box;	-	-	-	gi|226533387|ref|NP_001150772.1|/0/F-box protein interaction domain containing protein [Zea mays]	GRMZM2G128215
GRMZM2G100881	70	16.76	2	0.48	135	32.32	seq=gene; coord=3:17668136..17674603:-1;IPR008654:IWS1, C-terminal;IPR008654:IWS1, C-terminal;	-	-	-	gi|223949149|gb|ACN28658.1|/1.85229e-176/unknown [Zea mays]	GRMZM2G100881
GRMZM2G115988	0	0	2	0.48	0	0	seq=gene; coord=1:237253656..237254413:-1;IPR011016:Zinc finger, RING-CH-type;IPR001841:Zinc finger, RING-type;	GO:0016023//cytoplasmic membrane-bounded vesicle	-	-	gi|226500012|ref|NP_001151998.1|/3.43501e-46/protein binding protein [Zea mays]	GRMZM2G115988
GRMZM2G043162	1	0.24	0	0	0	0	seq=gene; coord=4:39974931..39975684:-1;IPR000104:Antifreeze protein, type I;IPR010241:Ferredoxin [2Fe-2S], plant;IPR001041:Ferredoxin;IPR006058:2Fe-2S ferredoxin, iron-sulphur binding site;IPR010916:TonB box, conserved site;	GO:0009507//chloroplast	GO:0009055//electron carrier activity;GO:0005506//iron ion binding;GO:0005515//protein binding;GO:0051537//2 iron, 2 sulfur cluster binding	GO:0006810//transport;GO:0022900//electron transport chain	gi|259489872|ref|NP_001158976.1|/4.59616e-51/ferredoxin-1 [Zea mays]	GRMZM2G043162
GRMZM2G145556	42	10.06	55	13.17	92	22.03	seq=gene; coord=6:165490716..165499809:-1;IPR001680:WD40 repeat;IPR002290:Serine/threonine protein kinase;IPR011046:WD40 repeat-like;IPR011009:Protein kinase-like;	-	GO:0005515//protein binding	-	gi|242091417|ref|XP_002441541.1|/0/hypothetical protein SORBIDRAFT_09g029030 [Sorghum bicolor]	GRMZM2G145556
GRMZM2G103266	97	23.22	8	1.92	140	33.52	seq=gene; coord=6:80527910..80534611:1;IPR002470:Peptidase S9A, prolyl oligopeptidase;IPR004106:Peptidase S9A, oligopeptidase, N-terminal beta-propeller;IPR001375:Peptidase S9, prolyl oligopeptidase active site region;IPR002470:Peptidase S9A, prolyl oligopeptidase;IPR004106:Peptidase S9A, oligopeptidase, N-terminal beta-propeller;IPR001375:Peptidase S9, prolyl oligopeptidase active site region;IP…	GO:0005739//mitochondrion;GO:0005739//mitochondrion;GO:0005739//mitochondrion;GO:0005739//mitochondrion;GO:0005739//mitochondrion;GO:0005739//mitochondrion;GO:0005739//mitochondrion;GO:0005739//mitochondrion;GO:0005739//mitochondrion;GO:0005739//mitochondrion;GO:0005739//mitochondrion	-	-	gi|226510034|ref|NP_001147906.1|/0/protease 2 [Zea mays]	GRMZM2G103266
GRMZM2G095798	189	45.25	33	7.9	21	5.03	seq=gene; coord=1:273479529..273483231:1;IPR000104:Antifreeze protein, type I;	-	-	-	gi|115455233|ref|NP_001051217.1|/2.66864e-27/Os03g0740200 [Oryza sativa (japonica cultivar-group)]	GRMZM2G095798
GRMZM2G128146	0	0	0	0	1	0.24	seq=gene; coord=5:172979201..172981795:-1;IPR002347:Glucose/ribitol dehydrogenase;IPR002198:Short-chain dehydrogenase/reductase SDR;IPR003560:2,3-dihydro-2,3-dihydroxybenzoate dehydrogenase;IPR002424:Insect alcohol dehydrogenase family;IPR016040:NAD(P)-binding;IPR013120:Male sterility, NAD-binding;	-	-	-	gi|226492367|ref|NP_001144211.1|/1.55989e-112/hypothetical protein LOC100277072 [Zea mays]	GRMZM2G128146
GRMZM2G052100	0	0	1	0.24	0	0	seq=gene; coord=10:115864705..115865752:-1;IPR003496:ABA/WDS induced protein;	-	-	-	gi|163838700|ref|NP_001106235.1|/1.87483e-13/Asr protein [Zea mays]	GRMZM2G052100
GRMZM2G075372	7	1.68	1	0.24	4	0.96	seq=gene; coord=5:203311409..203315996:-1;IPR004853:Protein of unknown function DUF250;IPR004853:Protein of unknown function DUF250;	-	-	-	gi|242066152|ref|XP_002454365.1|/3.96024e-143/hypothetical protein SORBIDRAFT_04g029470 [Sorghum bicolor]	GRMZM2G075372
GRMZM2G309327	8	1.92	5	1.2	5	1.2	seq=gene; coord=9:127322773..127323802:1;IPR008080:Parvalbumin;IPR002048:Calcium-binding EF-hand;IPR018247:EF-HAND 1;IPR018248:EF hand;	-	-	-	gi|226499912|ref|NP_001141189.1|/2.20204e-74/hypothetical protein LOC100273276 [Zea mays]	GRMZM2G309327
GRMZM2G096051	11	2.63	54	12.93	85	20.35	seq=gene; coord=6:81408144..81413035:1;IPR011048:Cytochrome cd1-nitrite reductase-like, C-terminal haem d1;IPR001680:WD40 repeat;IPR012952:BING4, C-terminal;IPR001680:WD40 repeat;IPR011048:Cytochrome cd1-nitrite reductase-like, C-terminal haem d1;IPR012952:BING4, C-terminal;IPR001680:WD40 repeat;IPR011048:Cytochrome cd1-nitrite reductase-like, C-terminal haem d1;IPR012952:BING4, C-terminal;IPR011…	GO:0005730//nucleolus;GO:0005730//nucleolus	-	-	gi|212274919|ref|NP_001130549.1|/0/hypothetical protein LOC100191648 [Zea mays]	GRMZM2G096051
GRMZM2G176495	39	9.34	15	3.59	42	10.06	seq=gene; coord=6:142791192..142795162:1;IPR001164:Arf GTPase activating protein;IPR016160:Aldehyde dehydrogenase, conserved site;IPR000008:C2 calcium-dependent membrane targeting;IPR008973:C2 calcium/lipid-binding region, CaLB;IPR001164:Arf GTPase activating protein;IPR000008:C2 calcium-dependent membrane targeting;IPR016160:Aldehyde dehydrogenase, conserved site;IPR008973:C2 calcium/lipid-bindi…	-	-	-	gi|194692408|gb|ACF80288.1|/0/unknown [Zea mays]	GRMZM2G176495
GRMZM2G159678	34	8.14	24	5.75	61	14.6	seq=gene; coord=2:84207682..84214181:-1;IPR005181:Protein of unknown function DUF303, acetylesterase putative;IPR005181:Protein of unknown function DUF303, acetylesterase putative;	GO:0005739//mitochondrion;GO:0005739//mitochondrion;GO:0005739//mitochondrion	GO:0016787//hydrolase activity;GO:0016787//hydrolase activity	-	gi|195657565|gb|ACG48250.1|/8.58348e-133/receptor protein kinase-like protein [Zea mays]	GRMZM2G159678
GRMZM2G351018	74	17.72	369	88.34	196	46.93	seq=gene; coord=8:173229680..173235257:1	GO:0005634//nucleus	GO:0043565//sequence-specific DNA binding;GO:0005515//protein binding;GO:0003700//transcription factor activity;GO:0008270//zinc ion binding	GO:0006355//regulation of transcription, DNA-dependent	gi|162464040|ref|NP_001105549.1|/0/LOC542536 [Zea mays]	GRMZM2G351018
GRMZM2G166692	13	3.11	70	16.76	17	4.07	seq=gene; coord=7:94402093..94403633:1;IPR007650:Protein of unknown function DUF581;IPR007650:Protein of unknown function DUF581;	-	-	-	gi|194707576|gb|ACF87872.1|/1.21914e-68/unknown [Zea mays]	GRMZM2G166692
GRMZM2G077180	2	0.48	2	0.48	6	1.44	seq=gene; coord=5:56138605..56143321:-1;IPR018616:Guanylyl cyclase;IPR005142:eRF1 domain 3;	-	-	-	gi|195653853|gb|ACG46394.1|/4.18274e-99/guanylyl cyclase [Zea mays]	GRMZM2G077180
GRMZM2G070360	49	11.73	255	61.05	343	82.12	seq=gene; coord=3:210597353..210606712:-1;IPR002842:ATPase, V1/A1 complex, subunit E;	-	-	-	gi|195619166|gb|ACG31413.1|/3.51715e-115/vacuolar ATP synthase subunit E [Zea mays]	GRMZM2G070360
GRMZM2G157246	11	2.63	26	6.22	22	5.27	seq=gene; coord=6:155361847..155364103:-1;IPR011016:Zinc finger, RING-CH-type;IPR001841:Zinc finger, RING-type;	-	-	-	gi|212275552|ref|NP_001130065.1|/5.17848e-166/hypothetical protein LOC100191157 [Zea mays]	GRMZM2G157246
GRMZM2G104649	170	40.7	517	123.78	1022	244.69	seq=gene; coord=10:107395981..107402824:1	-	-	-	gi|226529736|ref|NP_001140776.1|/5.11411e-155/hypothetical protein LOC100272851 [Zea mays]	GRMZM2G104649
GRMZM2G399136	87	20.83	82	19.63	293	70.15	seq=gene; coord=5:60838738..60839986:-1;IPR003095:Heat shock protein DnaJ;IPR001623:Heat shock protein DnaJ, N-terminal;IPR018253:Heat shock protein DnaJ, conserved site;	-	-	-	gi|226493673|ref|NP_001147752.1|/6.50115e-42/chaperone protein dnaJ 11 [Zea mays]	GRMZM2G399136
GRMZM2G129405	15	3.59	72	17.24	24	5.75	seq=gene; coord=4:205240943..205242361:-1	-	-	-	gi|242079997|ref|XP_002444767.1|/1.02466e-110/hypothetical protein SORBIDRAFT_07g027670 [Sorghum bicolor]	GRMZM2G129405
GRMZM2G074501	13	3.11	4	0.96	17	4.07	seq=gene; coord=1:277677834..277680445:1;IPR001092:Basic helix-loop-helix dimerisation region bHLH;IPR011598:Helix-loop-helix DNA-binding;IPR011598:Helix-loop-helix DNA-binding;	GO:0005634//nucleus;GO:0005634//nucleus;GO:0005634//nucleus	GO:0030528//transcription regulator activity;GO:0030528//transcription regulator activity;GO:0030528//transcription regulator activity	GO:0045449//regulation of transcription;GO:0045449//regulation of transcription;GO:0045449//regulation of transcription	gi|226495765|ref|NP_001142090.1|/7.81248e-73/hypothetical protein LOC100274252 [Zea mays]	GRMZM2G074501
GRMZM2G124436	2	0.48	0	0	0	0	seq=gene; coord=1:193390177..193391596:-1;IPR000104:Antifreeze protein, type I;	-	-	-	gi|242079871|ref|XP_002444704.1|/3.13192e-163/hypothetical protein SORBIDRAFT_07g026350 [Sorghum bicolor]	GRMZM2G124436
GRMZM2G104394	13	3.11	56	13.41	112	26.82	seq=gene; coord=3:58709954..58717511:1;IPR000823:Plant peroxidase;IPR002016:Haem peroxidase, plant/fungal/bacterial;IPR002207:Plant ascorbate peroxidase;IPR010255:Haem peroxidase;	-	-	-	gi|195641104|gb|ACG40020.1|/3.26241e-158/peroxidase 1 precursor [Zea mays]	GRMZM2G104394
GRMZM2G017739	1	0.24	1	0.24	0	0	seq=gene; coord=9:108020795..108022842:-1	-	-	-	-	GRMZM2G017739
GRMZM2G136347	1	0.24	0	0	0	0	seq=gene; coord=1:182140163..182141670:-1;IPR011051:Cupin, RmlC-type;IPR012864:Protein of unknown function DUF1637;	-	-	-	gi|226496579|ref|NP_001147194.1|/1.87802e-111/cupin, RmlC-type [Zea mays]	GRMZM2G136347
GRMZM2G091717	63	15.08	94	22.51	83	19.87	seq=gene; coord=2:50916471..50917778:1;IPR016181:Acyl-CoA N-acyltransferase;	-	-	-	gi|226497364|ref|NP_001145102.1|/1.60304e-67/hypothetical protein LOC100278317 [Zea mays]	GRMZM2G091717
GRMZM2G051613	640	153.23	338	80.92	391	93.61	seq=gene; coord=9:130107705..130118027:1;IPR006806:ETC complex I subunit;IPR006806:ETC complex I subunit;	-	-	-	gi|242041137|ref|XP_002467963.1|/1.11827e-31/hypothetical protein SORBIDRAFT_01g037220 [Sorghum bicolor]	GRMZM2G051613
GRMZM2G078441	0	0	1	0.24	3	0.72	seq=gene; coord=9:144013131..144015953:-1	-	-	-	gi|242041881|ref|XP_002468335.1|/8.13443e-165/hypothetical protein SORBIDRAFT_01g043980 [Sorghum bicolor]	GRMZM2G078441
AC232238.2_FG006	0	0	3	0.72	1	0.24	seq=gene; coord=8:165497057..165499756:-1;IPR000490:Glycoside hydrolase, family 17	GO:0016023//cytoplasmic membrane-bounded vesicle	-	-	gi|194702980|gb|ACF85574.1|/0/unknown [Zea mays]	AC232238.2_FG006
GRMZM2G450424	60	14.37	128	30.65	125	29.93	seq=gene; coord=8:166977123..166979801:1;IPR005578:Hrf1;IPR005578:Hrf1;IPR005578:Hrf1;IPR005578:Hrf1;	GO:0016020//membrane;GO:0016020//membrane;GO:0016020//membrane	-	-	gi|226503265|ref|NP_001140563.1|/4.45143e-146/hypothetical protein LOC100272628 [Zea mays]	GRMZM2G450424
GRMZM2G122810	285	68.24	354	84.75	396	94.81	seq=gene; coord=7:18017780..18026599:-1;IPR004033:UbiE/COQ5 methyltransferase;IPR003333:Cyclopropane-fatty-acyl-phospholipid synthase;IPR013216:Methyltransferase type 11;IPR013217:Methyltransferase type 12;IPR013705:Sterol methyltransferase C-terminal;IPR004033:UbiE/COQ5 methyltransferase;IPR003333:Cyclopropane-fatty-acyl-phospholipid synthase;IPR013216:Methyltransferase type 11;IPR013217:Methylt…	-	GO:0003838//sterol 24-C-methyltransferase activity;GO:0003838//sterol 24-C-methyltransferase activity;GO:0003838//sterol 24-C-methyltransferase activity;GO:0003838//sterol 24-C-methyltransferase activity	GO:0006694//steroid biosynthetic process;GO:0006694//steroid biosynthetic process;GO:0006694//steroid biosynthetic process;GO:0006694//steroid biosynthetic process	gi|162464376|ref|NP_001106071.1|/1.78076e-173/sterol methyltransferase1 [Zea mays]	GRMZM2G122810
AC205536.3_FG003	2	0.48	0	0	3	0.72	seq=gene; coord=5:99998854..100000233:-1;IPR010108:Lycopene cyclase, beta and epsilon	-	GO:0016705//oxidoreductase activity, acting on paired donors, with incorporation or reduction of molecular oxygen	GO:0016117//carotenoid biosynthetic process	gi|293334857|ref|NP_001169155.1|/0/hypothetical protein LOC100383002 [Zea mays]	AC205536.3_FG003
GRMZM2G046681	2	0.48	5	1.2	9	2.15	seq=gene; coord=3:224994063..224999034:1;IPR016196:Major facilitator superfamily, general substrate transporter;IPR011701:Major facilitator superfamily MFS-1;IPR016196:Major facilitator superfamily, general substrate transporter;IPR011701:Major facilitator superfamily MFS-1;IPR016196:Major facilitator superfamily, general substrate transporter;IPR011701:Major facilitator superfamily MFS-1;	GO:0016020//membrane;GO:0009536//plastid;GO:0016020//membrane;GO:0009536//plastid;GO:0016020//membrane;GO:0009536//plastid	GO:0005215//transporter activity;GO:0005215//transporter activity;GO:0005215//transporter activity	GO:0006810//transport;GO:0006810//transport;GO:0006810//transport	gi|212275784|ref|NP_001130577.1|/0/hypothetical protein LOC100191676 [Zea mays]	GRMZM2G046681
GRMZM2G000581	9	2.15	4	0.96	0	0	seq=gene; coord=8:159048505..159052197:1;IPR004263:Exostosin-like;	GO:0016023//cytoplasmic membrane-bounded vesicle	-	GO:0009987//cellular process	gi|226503833|ref|NP_001149319.1|/0/secondary cell wall-related glycosyltransferase family 47 [Zea mays]	GRMZM2G000581
GRMZM2G550861	4	0.96	1	0.24	0	0	seq=gene; coord=1:51113953..51114705:1;IPR017997:Vinculin;IPR011598:Helix-loop-helix DNA-binding;	-	-	-	gi|242041139|ref|XP_002467964.1|/4.28838e-33/hypothetical protein SORBIDRAFT_01g037235 [Sorghum bicolor]	GRMZM2G550861
GRMZM2G396451	70	16.76	210	50.28	218	52.19	seq=gene; coord=1:273494602..273510897:-1	-	-	-	gi|194704310|gb|ACF86239.1|/0/unknown [Zea mays]	GRMZM2G396451
GRMZM2G027344	3	0.72	17	4.07	11	2.63	seq=gene; coord=7:148022862..148026977:1;IPR001806:Ras GTPase;IPR003579:Ras small GTPase, Rab type;IPR003578:Ras small GTPase, Rho type;IPR013684:Miro-like;IPR013753:Ras;	-	-	-	gi|226499814|ref|NP_001151110.1|/2.36507e-90/septum-promoting GTP-binding protein 1 [Zea mays]	GRMZM2G027344
AC215198.3_FG002	0	0	1	0.24	0	0	seq=gene; coord=9:12602132..12604495:1;IPR002885:Pentatricopeptide repeat	-	-	-	gi|115466812|ref|NP_001057005.1|/0/Os06g0185800 [Oryza sativa (japonica cultivar-group)]	AC215198.3_FG002
GRMZM2G104999	165	39.51	75	17.96	49	11.73	seq=gene; coord=2:162506304..162510250:1;IPR001910:Inosine/uridine-preferring nucleoside hydrolase;IPR001910:Inosine/uridine-preferring nucleoside hydrolase;IPR001910:Inosine/uridine-preferring nucleoside hydrolase;IPR001910:Inosine/uridine-preferring nucleoside hydrolase;IPR001910:Inosine/uridine-preferring nucleoside hydrolase;	-	GO:0016787//hydrolase activity;GO:0016787//hydrolase activity;GO:0016787//hydrolase activity;GO:0016787//hydrolase activity;GO:0016787//hydrolase activity	-	gi|226502610|ref|NP_001148615.1|/0/pyrimidine-specific ribonucleoside hydrolase rihB [Zea mays]	GRMZM2G104999
GRMZM2G169356	0	0	0	0	1	0.24	seq=gene; coord=7:103263247..103264614:-1;IPR009057:Homeodomain-like;IPR014778:Myb, DNA-binding;IPR001005:SANT, DNA-binding;	-	-	-	gi|242044636|ref|XP_002460189.1|/1.27965e-103/hypothetical protein SORBIDRAFT_02g024250 [Sorghum bicolor]	GRMZM2G169356
GRMZM2G028730	93	22.27	179	42.86	128	30.65	seq=gene; coord=2:83298640..83301619:-1	-	-	-	gi|226529621|ref|NP_001143476.1|/6.10894e-32/hypothetical protein LOC100276147 [Zea mays]	GRMZM2G028730
GRMZM2G037685	360	86.19	103	24.66	24	5.75	seq=gene; coord=2:191196280..191197630:-1	-	-	-	gi|238007636|gb|ACR34853.1|/4.02978e-92/unknown [Zea mays]	GRMZM2G037685
GRMZM2G152908	236	56.5	681	163.04	793	189.86	seq=gene; coord=9:117891216..117897889:-1;IPR012820:Sucrose synthase, plants and cyanobacteria;IPR000368:Sucrose synthase;IPR001296:Glycosyl transferase, group 1;IPR001296:Glycosyl transferase, group 1;IPR000368:Sucrose synthase;IPR000368:Sucrose synthase;	GO:0005739//mitochondrion	GO:0016157//sucrose synthase activity;GO:0016157//sucrose synthase activity;GO:0016157//sucrose synthase activity;GO:0016157//sucrose synthase activity	GO:0009058//biosynthetic process;GO:0005985//sucrose metabolic process;GO:0009058//biosynthetic process;GO:0005985//sucrose metabolic process;GO:0009058//biosynthetic process;GO:0005985//sucrose metabolic process;GO:0009058//biosynthetic process;GO:0005985//sucrose metabolic process	gi|223948981|gb|ACN28574.1|/0/unknown [Zea mays]	GRMZM2G152908
GRMZM2G455587	13	3.11	6	1.44	7	1.68	seq=gene; coord=6:165904335..165907188:1;IPR003527:MAP kinase, conserved site;IPR002885:Pentatricopeptide repeat;	-	-	-	gi|242088929|ref|XP_002440297.1|/0/hypothetical protein SORBIDRAFT_09g029295 [Sorghum bicolor]	GRMZM2G455587
GRMZM2G371137	11	2.63	30	7.18	17	4.07	seq=gene; coord=1:5742505..5747301:1;IPR001245:Tyrosine protein kinase;IPR003591:Leucine-rich repeat, typical subtype;IPR002290:Serine/threonine protein kinase;IPR011009:Protein kinase-like;IPR013210:Leucine-rich repeat, N-terminal;IPR001611:Leucine-rich repeat;	GO:0016023//cytoplasmic membrane-bounded vesicle	GO:0004713//protein tyrosine kinase activity;GO:0005524//ATP binding;GO:0004674//protein serine/threonine kinase activity	GO:0006468//protein amino acid phosphorylation	gi|242042397|ref|XP_002468593.1|/0/hypothetical protein SORBIDRAFT_01g048690 [Sorghum bicolor]	GRMZM2G371137
GRMZM2G386088	3	0.72	0	0	0	0	seq=gene; coord=4:175816698..175822769:-1	-	-	-	gi|242063252|ref|XP_002452915.1|/1.13959e-44/hypothetical protein SORBIDRAFT_04g034930 [Sorghum bicolor]	GRMZM2G386088
GRMZM2G016774	72	17.24	113	27.05	212	50.76	seq=gene; coord=1:296666547..296675133:-1;IPR000873:AMP-dependent synthetase and ligase;	GO:0009536//plastid	-	-	gi|115456555|ref|NP_001051878.1|/8.71997e-137/Os03g0845500 [Oryza sativa (japonica cultivar-group)]	GRMZM2G016774
GRMZM2G703490	357	85.48	267	63.92	712	170.47	seq=gene; coord=1:11371026..11375569:-1	-	GO:0042802//identical protein binding;GO:0042802//identical protein binding	-	gi|242036895|ref|XP_002465842.1|/1.59378e-30/hypothetical protein SORBIDRAFT_01g046840 [Sorghum bicolor]	GRMZM2G703490
GRMZM2G317770	28	6.7	32	7.66	72	17.24	seq=gene; coord=1:195762771..195775957:1;IPR001245:Tyrosine protein kinase;IPR017441:Protein kinase, ATP binding site;IPR008271:Serine/threonine protein kinase, active site;IPR002482:Peptidoglycan-binding Lysin subgroup;IPR002290:Serine/threonine protein kinase;IPR011009:Protein kinase-like;IPR018392:Peptidoglycan-binding lysin domain;IPR017442:Serine/threonine protein kinase-related;	GO:0016023//cytoplasmic membrane-bounded vesicle	-	-	gi|226510246|ref|NP_001146346.1|/0/hypothetical protein LOC100279924 [Zea mays]	GRMZM2G317770
GRMZM2G075974	0	0	5	1.2	2	0.48	seq=gene; coord=1:260687785..260691405:-1;IPR011702:Glutamine amidotransferase superfamily;IPR000104:Antifreeze protein, type I;IPR006220:Anthranilate synthase component II/delta crystallin;IPR000991:Glutamine amidotransferase class-I, C-terminal;IPR011702:Glutamine amidotransferase superfamily;IPR000104:Antifreeze protein, type I;IPR006220:Anthranilate synthase component II/delta crystallin;IPR0…	GO:0005739//mitochondrion;GO:0005739//mitochondrion	-	-	gi|224034667|gb|ACN36409.1|/5.02727e-140/unknown [Zea mays]	GRMZM2G075974
GRMZM2G071620	82	19.63	227	54.35	565	135.27	seq=gene; coord=5:6878250..6885264:1;IPR002100:Transcription factor, MADS-box;IPR002487:Transcription factor, K-box;	GO:0005634//nucleus	GO:0043565//sequence-specific DNA binding;GO:0003700//transcription factor activity	GO:0006355//regulation of transcription, DNA-dependent	gi|162458594|ref|NP_001105150.1|/4.68626e-135/m31 protein [Zea mays]	GRMZM2G071620
GRMZM2G084968	19	4.55	89	21.31	92	22.03	seq=gene; coord=9:27041932..27044865:-1;IPR008580:Protein of unknown function DUF862, eukaryotic;	-	-	-	gi|242091692|ref|XP_002436336.1|/3.93647e-133/hypothetical protein SORBIDRAFT_10g000670 [Sorghum bicolor]	GRMZM2G084968
GRMZM2G017086	159	38.07	240	57.46	264	63.21	seq=gene; coord=3:225045564..225054359:-1;IPR000626:Ubiquitin;IPR001394:Peptidase C19, ubiquitin carboxyl-terminal hydrolase 2;IPR018200:Peptidase C19, ubiquitin carboxyl-terminal hydrolase 2, conserved site;IPR018200:Peptidase C19, ubiquitin carboxyl-terminal hydrolase 2, conserved site;IPR000626:Ubiquitin;IPR001394:Peptidase C19, ubiquitin carboxyl-terminal hydrolase 2;IPR000626:Ubiquitin;IPR01…	-	-	-	gi|226509912|ref|NP_001148768.1|/0/ubiquitin carboxyl-terminal hydrolase 6 [Zea mays]	GRMZM2G017086
GRMZM2G106836	1	0.24	0	0	3	0.72	seq=gene; coord=10:148327787..148328518:1;IPR006458:Protein of unknown function DUF623, plant;	-	-	-	gi|242074842|ref|XP_002447357.1|/5.65077e-67/hypothetical protein SORBIDRAFT_06g033540 [Sorghum bicolor]	GRMZM2G106836
GRMZM2G030636	4	0.96	16	3.83	46	11.01	seq=gene; coord=1:80805809..80809563:-1;IPR000073:Alpha/beta hydrolase fold-1;	GO:0016023//cytoplasmic membrane-bounded vesicle	-	-	gi|242035269|ref|XP_002465029.1|/0/hypothetical protein SORBIDRAFT_01g030740 [Sorghum bicolor]	GRMZM2G030636
GRMZM2G443340	62	14.84	15	3.59	5	1.2	seq=gene; coord=8:126518592..126522045:-1;IPR013219:Ribosomal protein S27/S33, mitochondrial;	-	-	-	gi|242086883|ref|XP_002439274.1|/5.70761e-37/hypothetical protein SORBIDRAFT_09g003610 [Sorghum bicolor]	GRMZM2G443340
GRMZM2G164426	131	31.37	132	31.6	127	30.41	seq=gene; coord=2:196442337..196445283:-1;IPR000104:Antifreeze protein, type I;IPR001841:Zinc finger, RING-type;	-	-	-	gi|226509626|ref|NP_001146810.1|/8.50538e-107/hypothetical protein LOC100280415 [Zea mays]	GRMZM2G164426
GRMZM2G006474	267	63.93	301	72.06	115	27.53	seq=gene; coord=5:14380122..14386451:-1;IPR000904:SEC7-like;IPR016024:Armadillo-type fold;IPR000104:Antifreeze protein, type I;	-	-	-	gi|242038609|ref|XP_002466699.1|/9.9491e-73/hypothetical protein SORBIDRAFT_01g012520 [Sorghum bicolor]	GRMZM2G006474
GRMZM2G303775	14	3.35	1	0.24	22	5.27	seq=gene; coord=9:25692387..25693481:1;IPR017859:Treacher Collins Syndrome, treacle-like;	-	-	-	gi|226495175|ref|NP_001144624.1|/6.52571e-72/hypothetical protein LOC100277642 [Zea mays]	GRMZM2G303775
GRMZM2G087079	4	0.96	15	3.59	3	0.72	seq=gene; coord=1:45666961..45668187:1	-	-	-	gi|293332309|ref|NP_001168569.1|/6.78564e-115/hypothetical protein LOC100382352 [Zea mays]	GRMZM2G087079
GRMZM2G087146	35	8.38	67	16.04	36	8.62	seq=gene; coord=8:21182788..21185321:1	-	-	-	gi|223947745|gb|ACN27956.1|/0/unknown [Zea mays]	GRMZM2G087146
GRMZM2G702402	1	0.24	0	0	0	0	seq=gene; coord=4:32086416..32086826:-1	-	-	-	-	GRMZM2G702402
GRMZM2G433137	14	3.35	14	3.35	0	0	seq=gene; coord=8:169503122..169504099:1;IPR007612:Protein of unknown function DUF567;	-	-	-	gi|242054779|ref|XP_002456535.1|/1.99659e-45/hypothetical protein SORBIDRAFT_03g038010 [Sorghum bicolor]	GRMZM2G433137
GRMZM2G143392	107	25.62	57	13.65	23	5.51	seq=gene; coord=4:17303016..17308067:1;IPR000943:RNA polymerase sigma-70 factor;IPR000792:Bacterial regulatory protein, LuxR;IPR014284:RNA polymerase sigma-70;IPR016262:RNA polymerase sigma factor, SigB/SigC/SigD, plastid;IPR013325:RNA polymerase sigma factor, region 2;IPR013324:RNA polymerase sigma factor, regions 3 and 4;IPR007627:RNA polymerase sigma-70 region 2;IPR007624:RNA polymerase sigma-…	GO:0009536//plastid;GO:0005739//mitochondrion	GO:0030528//transcription regulator activity;GO:0003677//DNA binding	GO:0006351//transcription, DNA-dependent	gi|162458688|ref|NP_001104923.1|/0/sigma factor SIG2A [Zea mays]	GRMZM2G143392
GRMZM2G383854	5	1.2	3	0.72	7	1.68	seq=gene; coord=1:83215786..83217871:-1;IPR002885:Pentatricopeptide repeat;IPR003527:MAP kinase, conserved site;	-	-	-	gi|242035229|ref|XP_002465009.1|/0/hypothetical protein SORBIDRAFT_01g030410 [Sorghum bicolor]	GRMZM2G383854
GRMZM2G004172	535	128.09	465	111.33	285	68.23	seq=gene; coord=9:144833343..144836800:1;IPR009346:GRIM-19;	-	-	-	gi|238006446|gb|ACR34258.1|/5.09891e-81/unknown [Zea mays]	GRMZM2G004172
GRMZM2G031479	186	44.53	78	18.67	56	13.41	seq=gene; coord=9:32613399..32619002:-1;IPR001258:NHL repeat;	-	-	-	gi|293332279|ref|NP_001170567.1|/0/hypothetical protein LOC100384592 [Zea mays]	GRMZM2G031479
GRMZM2G328374	3	0.72	4	0.96	3	0.72	seq=gene; coord=3:103731405..103745837:-1;IPR014001:DEAD-like helicase, N-terminal;IPR002464:DNA/RNA helicase, ATP-dependent, DEAH-box type, conserved site;	-	-	-	gi|222612987|gb|EEE51119.1|/1.30965e-90/hypothetical protein OsJ_31861 [Oryza sativa Japonica Group]	GRMZM2G328374
GRMZM2G067373	35	8.38	63	15.08	81	19.39	seq=gene; coord=6:112496397..112507304:-1;IPR014025:Glutaredoxin subgroup;IPR000591:Pleckstrin/G-protein, interacting region;IPR012336:Thioredoxin-like fold;IPR002109:Glutaredoxin;IPR006869:Protein of unknown function DUF547;	-	-	-	gi|242095204|ref|XP_002438092.1|/0/hypothetical protein SORBIDRAFT_10g007910 [Sorghum bicolor]	GRMZM2G067373
GRMZM2G069596	4	0.96	9	2.15	16	3.83	seq=gene; coord=5:134901691..134911145:-1;IPR001544:Aminotransferase, class IV;	GO:0009536//plastid	-	-	gi|242064772|ref|XP_002453675.1|/0/hypothetical protein SORBIDRAFT_04g010240 [Sorghum bicolor]	GRMZM2G069596
GRMZM2G461447	40	9.58	56	13.41	92	22.03	seq=gene; coord=6:37191120..37195358:-1;IPR011011:Zinc finger, FYVE/PHD-type;IPR003105:SRA-YDG;IPR001965:Zinc finger, PHD-type;IPR001841:Zinc finger, RING-type;IPR003613:U box;IPR017907:Zinc finger, RING-type, conserved site;IPR017907:Zinc finger, RING-type, conserved site;IPR001841:Zinc finger, RING-type;	-	-	-	gi|242086515|ref|XP_002439090.1|/0/hypothetical protein SORBIDRAFT_09g000320 [Sorghum bicolor]	GRMZM2G461447
GRMZM2G150859	1	0.24	17	4.07	16	3.83	seq=gene; coord=3:171720399..171721992:1	-	-	-	gi|293331675|ref|NP_001170097.1|/8.21355e-68/hypothetical protein LOC100384015 [Zea mays]	GRMZM2G150859
GRMZM2G062396	0	0	4	0.96	1	0.24	seq=gene; coord=2:3544183..3546126:1;IPR002283:Isopenicillin N synthase;IPR005123:2OG-Fe(II) oxygenase;	-	GO:0045486//naringenin 3-dioxygenase activity;GO:0005506//iron ion binding	GO:0055114//oxidation reduction	gi|212274359|ref|NP_001130275.1|/0/hypothetical protein LOC100191369 [Zea mays]	GRMZM2G062396
GRMZM2G045171	5	1.2	12	2.87	2	0.48	seq=gene; coord=4:167833903..167837431:-1;IPR012820:Sucrose synthase, plants and cyanobacteria;IPR000368:Sucrose synthase;IPR001296:Glycosyl transferase, group 1;	-	-	-	gi|242063616|ref|XP_002453097.1|/0/hypothetical protein SORBIDRAFT_04g038410 [Sorghum bicolor]	GRMZM2G045171
GRMZM2G396557	2	0.48	0	0	0	0	seq=gene; coord=9:23487844..23488661:1	-	-	-	gi|226497204|ref|NP_001145081.1|/1.3824e-75/hypothetical protein LOC100278286 [Zea mays]	GRMZM2G396557
GRMZM2G013342	17	4.07	194	46.45	153	36.63	seq=gene; coord=1:289392805..289393902:1;IPR003685:Photosystem I protein PsaD;	GO:0009536//plastid	-	-	gi|212275394|ref|NP_001130880.1|/2.2419e-88/hypothetical protein LOC100191984 [Zea mays]	GRMZM2G013342
GRMZM2G157812	47	11.25	66	15.8	50	11.97	seq=gene; coord=10:96007279..96011976:-1;IPR003882:Pistil-specific extensin-like protein;IPR003072:Orphan nuclear receptor, NOR1 type;IPR003104:Actin-binding FH2 and DRF autoregulatory;IPR015425:Actin-binding FH2;	GO:0016023//cytoplasmic membrane-bounded vesicle	-	-	gi|242072122|ref|XP_002445997.1|/0/hypothetical protein SORBIDRAFT_06g000250 [Sorghum bicolor]	GRMZM2G157812
GRMZM2G037993	0	0	0	0	2	0.48	seq=gene; coord=2:221437834..221442320:1;IPR017938:Riboflavin synthase-like beta-barrel;IPR013623:NADPH oxidase Respiratory burst;IPR013130:Ferric reductase-like transmembrane component, N-terminal;IPR013112:FAD-binding 8;IPR013121:Ferric reductase, NAD binding;	GO:0016020//membrane	GO:0016491//oxidoreductase activity;GO:0005488//binding	-	gi|256017238|ref|NP_001157759.1|/0/LOC100136880 isoform 1 [Zea mays]	GRMZM2G037993
GRMZM2G177929	0	0	4	0.96	2	0.48	seq=gene; coord=3:197432670..197436346:-1;IPR000048:IQ calmodulin-binding region;IPR000048:IQ calmodulin-binding region;	-	-	-	gi|293333822|ref|NP_001167752.1|/0/hypothetical protein LOC100381442 [Zea mays]	GRMZM2G177929
GRMZM2G077214	18	4.31	32	7.66	72	17.24	seq=gene; coord=1:254050407..254057107:-1;IPR001395:Aldo/keto reductase;IPR001395:Aldo/keto reductase;	GO:0009536//plastid;GO:0009536//plastid	-	-	gi|226491818|ref|NP_001142068.1|/0/hypothetical protein LOC100274225 [Zea mays]	GRMZM2G077214
GRMZM2G173684	153	36.63	4	0.96	239	57.22	seq=gene; coord=4:199502948..199506636:-1;IPR009262:Protein of unknown function DUF914, eukaryotic;IPR013657:UAA transporter;IPR004853:Protein of unknown function DUF250;	GO:0016020//membrane	-	-	gi|212723154|ref|NP_001132272.1|/2.14278e-164/hypothetical protein LOC100193708 [Zea mays]	GRMZM2G173684
GRMZM2G110983	1	0.24	0	0	2	0.48	seq=gene; coord=6:65079276..65081119:-1;IPR001680:WD40 repeat;IPR000608:Ubiquitin-conjugating enzyme, E2;IPR016135:Ubiquitin-conjugating enzyme/RWD-like;IPR016135:Ubiquitin-conjugating enzyme/RWD-like;IPR001680:WD40 repeat;IPR001680:WD40 repeat;IPR000608:Ubiquitin-conjugating enzyme, E2;IPR016135:Ubiquitin-conjugating enzyme/RWD-like;	-	GO:0019787//small conjugating protein ligase activity;GO:0019787//small conjugating protein ligase activity;GO:0019787//small conjugating protein ligase activity	GO:0019941//modification-dependent protein catabolic process;GO:0051246//regulation of protein metabolic process;GO:0043687//post-translational protein modification;GO:0019941//modification-dependent protein catabolic process;GO:0051246//regulation of protein metabolic process;GO:0043687//post-translational protein modification;GO:0019941//modification-dependent protein catabolic process;GO:00512…	gi|226492605|ref|NP_001151129.1|/8.6115e-43/LOC100284762 [Zea mays]	GRMZM2G110983
GRMZM2G178319	3	0.72	6	1.44	4	0.96	seq=gene; coord=3:76180157..76190799:1;IPR006868:Protein of unknown function DUF630;IPR006867:Protein of unknown function DUF632;	-	-	-	gi|293334029|ref|NP_001169630.1|/0/hypothetical protein LOC100383511 [Zea mays]	GRMZM2G178319
GRMZM2G351125	59	14.13	238	56.98	185	44.29	seq=gene; coord=UNKNOWN:2290946..2294535:-1;IPR005690:Chloroplast protein import component Toc86/159;IPR003593:ATPase, AAA+ type, core;IPR006703:AIG1;IPR002917:GTP-binding protein, HSR1-related;	-	GO:0005515//protein binding	-	gi|242089557|ref|XP_002440611.1|/0/hypothetical protein SORBIDRAFT_09g004020 [Sorghum bicolor]	GRMZM2G351125
GRMZM2G157177	5	1.2	97	23.22	84	20.11	seq=gene; coord=1:32207937..32216782:-1;IPR004827:Basic-leucine zipper (bZIP) transcription factor;IPR012900:G-box binding, MFMR;IPR011616:bZIP transcription factor, bZIP-1;IPR011700:Basic leucine zipper;IPR004827:Basic-leucine zipper (bZIP) transcription factor;IPR012900:G-box binding, MFMR;IPR011616:bZIP transcription factor, bZIP-1;IPR011700:Basic leucine zipper;	-	-	-	gi|224028699|gb|ACN33425.1|/1.35223e-179/unknown [Zea mays]	GRMZM2G157177
GRMZM2G110369	0	0	0	0	1	0.24	seq=gene; coord=3:130966156..130968532:-1;IPR002283:Isopenicillin N synthase;IPR005123:2OG-Fe(II) oxygenase;IPR002283:Isopenicillin N synthase;IPR005123:2OG-Fe(II) oxygenase;IPR005123:2OG-Fe(II) oxygenase;	-	GO:0016491//oxidoreductase activity;GO:0005506//iron ion binding;GO:0016491//oxidoreductase activity;GO:0005506//iron ion binding;GO:0016491//oxidoreductase activity;GO:0005506//iron ion binding	GO:0055114//oxidation reduction;GO:0055114//oxidation reduction;GO:0055114//oxidation reduction	gi|212275582|ref|NP_001130245.1|/0/hypothetical protein LOC100191339 [Zea mays]	GRMZM2G110369
GRMZM2G117412	6	1.44	0	0	2	0.48	seq=gene; coord=2:181076994..181079406:-1;IPR001344:Chlorophyll A-B binding protein;IPR001344:Chlorophyll A-B binding protein;IPR001344:Chlorophyll A-B binding protein;	GO:0009536//plastid;GO:0009536//plastid;GO:0009536//plastid;GO:0009536//plastid	-	-	gi|226495517|ref|NP_001141336.1|/3.75189e-160/hypothetical protein LOC100273427 [Zea mays]	GRMZM2G117412
GRMZM2G028945	146	34.96	102	24.42	268	64.16	seq=gene; coord=10:107589810..107594558:1;IPR000555:Mov34/MPN/PAD-1;IPR000555:Mov34/MPN/PAD-1;	-	-	-	gi|226529736|ref|NP_001140776.1|/4.05685e-175/hypothetical protein LOC100272851 [Zea mays]	GRMZM2G028945
GRMZM2G474531	36	8.62	1	0.24	12	2.87	seq=gene; coord=5:162865935..162869251:1;IPR002110:Ankyrin;	-	-	-	gi|242065184|ref|XP_002453881.1|/0/hypothetical protein SORBIDRAFT_04g020550 [Sorghum bicolor]	GRMZM2G474531
GRMZM2G074821	40	9.58	29	6.94	40	9.58	seq=gene; coord=3:209821775..209825710:-1;IPR001533:Transcriptional coactivator/pterin dehydratase;IPR001533:Transcriptional coactivator/pterin dehydratase;	GO:0005739//mitochondrion;GO:0005739//mitochondrion;GO:0005739//mitochondrion	-	-	gi|238006864|gb|ACR34467.1|/2.05294e-86/unknown [Zea mays]	GRMZM2G074821
GRMZM2G107945	77	18.44	44	10.53	14	3.35	seq=gene; coord=2:221889489..221893852:1;IPR001610:PAC motif;IPR001810:Cyclin-like F-box;IPR011043:Galactose oxidase/kelch, beta-propeller;IPR006652:Kelch repeat type 1;IPR011498:Kelch repeat type 2;	-	GO:0005515//protein binding	-	gi|226497550|ref|NP_001146157.1|/0/hypothetical protein LOC100279726 [Zea mays]	GRMZM2G107945
GRMZM2G337113	0	0	1	0.24	0	0	seq=gene; coord=2:42721869..42724242:-1;IPR000173:Glyceraldehyde 3-phosphate dehydrogenase;IPR016040:NAD(P)-binding;IPR000173:Glyceraldehyde 3-phosphate dehydrogenase;IPR006424:Glyceraldehyde-3-phosphate dehydrogenase, type I;IPR016040:NAD(P)-binding;IPR000173:Glyceraldehyde 3-phosphate dehydrogenase;IPR006036:Potassium uptake protein TrkA;IPR016040:NAD(P)-binding;IPR000173:Glyceraldehyde 3-phosp…	GO:0009507//chloroplast;GO:0009507//chloroplast;GO:0009507//chloroplast;GO:0009507//chloroplast;GO:0009507//chloroplast	GO:0051287//NAD or NADH binding;GO:0004365//glyceraldehyde-3-phosphate dehydrogenase (phosphorylating) activity;GO:0047100;GO:0051287//NAD or NADH binding;GO:0004365//glyceraldehyde-3-phosphate dehydrogenase (phosphorylating) activity;GO:0047100;GO:0051287//NAD or NADH binding;GO:0004365//glyceraldehyde-3-phosphate dehydrogenase (phosphorylating) activity;GO:0047100;GO:0051287//NAD or NADH bindin…	GO:0019253//reductive pentose-phosphate cycle;GO:0055114//oxidation reduction;GO:0006006//glucose metabolic process;GO:0019253//reductive pentose-phosphate cycle;GO:0055114//oxidation reduction;GO:0006006//glucose metabolic process;GO:0019253//reductive pentose-phosphate cycle;GO:0055114//oxidation reduction;GO:0006006//glucose metabolic process;GO:0019253//reductive pentose-phosphate cycle;GO:00…	gi|162461856|ref|NP_001105414.1|/1.3607e-64/glyceraldehyde-3-phosphate dehydrogenase1 precursor [Zea mays]	GRMZM2G337113
GRMZM2G393433	2	0.48	1	0.24	17	4.07	seq=gene; coord=6:45408314..45410644:-1;IPR003441:No apical meristem (NAM) protein;IPR003441:No apical meristem (NAM) protein;	-	GO:0003677//DNA binding;GO:0003677//DNA binding	GO:0045449//regulation of transcription;GO:0045449//regulation of transcription	gi|60098048|emb|CAH56057.1|/1.74276e-150/hypothetical protein [Zea mays]	GRMZM2G393433
GRMZM2G325540	8	1.92	0	0	0	0	seq=gene; coord=1:188618196..188622050:1;IPR006592:RNA polymerase, N-terminal;IPR000722:RNA polymerase, alpha subunit;IPR007066:RNA polymerase Rpb1, domain 3;	-	-	-	gi|219662986|gb|ACL30982.1|/0/mutant DNA dependent RNA polymerase D largest subunit rpd1-8 [Zea mays]	GRMZM2G325540
GRMZM2G418689	27	6.46	21	5.03	39	9.34	seq=gene; coord=8:163280751..163284400:1;IPR017441:Protein kinase, ATP binding site;IPR008271:Serine/threonine protein kinase, active site;IPR001480:Curculin-like (mannose-binding) lectin;IPR003609:Apple-like;IPR001245:Tyrosine protein kinase;IPR002290:Serine/threonine protein kinase;IPR011009:Protein kinase-like;IPR000858:S-locus glycoprotein;IPR013227:PAN-like, type 2;IPR017442:Serine/threonine…	GO:0009536//plastid	GO:0005488//binding;GO:0016301//kinase activity	-	gi|242059503|ref|XP_002458897.1|/0/hypothetical protein SORBIDRAFT_03g042320 [Sorghum bicolor]	GRMZM2G418689
GRMZM2G135396	0	0	0	0	2	0.48	seq=gene; coord=2:37679402..37682008:-1	-	-	-	gi|223946667|gb|ACN27417.1|/4.33759e-61/unknown [Zea mays]	GRMZM2G135396
GRMZM2G451792	3	0.72	9	2.15	8	1.92	seq=gene; coord=4:200585931..200599832:1	-	-	-	gi|218201551|gb|EEC83978.1|/0/hypothetical protein OsI_30122 [Oryza sativa Indica Group]	GRMZM2G451792
GRMZM2G165945	19	4.55	18	4.31	29	6.94	seq=gene; coord=5:80220933..80225971:1;IPR008374:SF-assemblin;IPR006869:Protein of unknown function DUF547;	GO:0005739//mitochondrion;GO:0005739//mitochondrion	-	-	gi|224030023|gb|ACN34087.1|/0/unknown [Zea mays]	GRMZM2G165945
GRMZM2G053600	177	42.38	181	43.33	149	35.67	seq=gene; coord=4:30056883..30060552:1;IPR000104:Antifreeze protein, type I;IPR005061:Protein of unknown function DUF292, eukaryotic;	-	-	-	gi|194701852|gb|ACF85010.1|/0/unknown [Zea mays]	GRMZM2G053600
GRMZM2G176443	47	11.25	174	41.66	220	52.67	seq=gene; coord=10:117130225..117133758:-1	-	GO:0016853//isomerase activity;GO:0016853//isomerase activity	GO:0045454//cell redox homeostasis;GO:0045454//cell redox homeostasis	gi|162457921|ref|NP_001105803.1|/0/protein disulfide isomerase [Zea mays]	GRMZM2G176443
GRMZM2G127562	259	62.01	38	9.1	47	11.25	seq=gene; coord=7:118050333..118054924:1;IPR000559:Formate-tetrahydrofolate ligase, FTHFS;IPR000559:Formate-tetrahydrofolate ligase, FTHFS;	-	GO:0003824//catalytic activity;GO:0005488//binding;GO:0005488//binding	GO:0008152//metabolic process;GO:0008152//metabolic process	gi|242044850|ref|XP_002460296.1|/0/hypothetical protein SORBIDRAFT_02g026140 [Sorghum bicolor]	GRMZM2G127562
GRMZM2G061938	88	21.07	77	18.44	55	13.17	seq=gene; coord=5:192921543..192925093:-1	GO:0005739//mitochondrion;GO:0005739//mitochondrion;GO:0005739//mitochondrion	-	-	gi|226504890|ref|NP_001140757.1|/1.84214e-102/hypothetical protein LOC100272832 [Zea mays]	GRMZM2G061938
GRMZM2G021055	7	1.68	0	0	4	0.96	seq=gene; coord=1:252798444..252803794:1;IPR002528:Multi antimicrobial extrusion protein MatE;	GO:0016023//cytoplasmic membrane-bounded vesicle;GO:0016020//membrane;GO:0016023//cytoplasmic membrane-bounded vesicle;GO:0016020//membrane	-	-	gi|242033637|ref|XP_002464213.1|/0/hypothetical protein SORBIDRAFT_01g014210 [Sorghum bicolor]	GRMZM2G021055
GRMZM2G028190	47	11.25	26	6.22	32	7.66	seq=gene; coord=8:139821618..139836950:1;IPR018545:CASC3/Barentsz eIF4AIII binding;IPR018545:CASC3/Barentsz eIF4AIII binding;	-	-	-	gi|242053475|ref|XP_002455883.1|/2.33518e-45/hypothetical protein SORBIDRAFT_03g026810 [Sorghum bicolor]	GRMZM2G028190
GRMZM2G319630	1	0.24	0	0	0	0	seq=gene; coord=3:133504654..133505785:-1;IPR006514:Protein of unknown function DUF579, plant;	-	-	-	gi|226532448|ref|NP_001147380.1|/1.44954e-97/plant-specific domain TIGR01627 family protein [Zea mays]	GRMZM2G319630
GRMZM2G067053	3	0.72	145	34.72	264	63.21	seq=gene; coord=9:12799430..12804267:1;IPR011333:BTB/POZ fold;IPR004249:NPH3;IPR000210:BTB/POZ-like;IPR000210:BTB/POZ-like;IPR011333:BTB/POZ fold;IPR004249:NPH3;IPR004249:NPH3;	-	-	-	gi|223944543|gb|ACN26355.1|/0/unknown [Zea mays]	GRMZM2G067053
GRMZM2G401831	4	0.96	8	1.92	3	0.72	seq=gene; coord=4:242262621..242286128:1;IPR002016:Haem peroxidase, plant/fungal/bacterial;IPR008985:Concanavalin A-like lectin/glucanase;IPR016024:Armadillo-type fold;	-	-	-	gi|293334697|ref|NP_001169108.1|/3.14252e-108/hypothetical protein LOC100382952 [Zea mays]	GRMZM2G401831
GRMZM2G159389	67	16.04	53	12.69	112	26.82	seq=gene; coord=10:139982425..139985247:-1;IPR002744:Protein of unknown function DUF59;IPR002744:Protein of unknown function DUF59;	-	-	-	gi|194692926|gb|ACF80547.1|/2.7132e-60/unknown [Zea mays]	GRMZM2G159389
GRMZM2G340065	490	117.32	310	74.22	539	129.05	seq=gene; coord=10:146998109..147003312:-1;IPR000668:Peptidase C1A, papain C-terminal;IPR013201:Proteinase inhibitor I29, cathepsin propeptide;IPR000118:Granulin;IPR013090:Phospholipase A2, active site;IPR000169:Peptidase, cysteine peptidase active site;IPR018069:Whey acidic protein, 4-disulphide core, conserved site;IPR018254:Ribosomal protein L29, conserved site;IPR013032:EGF-like region, conse…	GO:0016023//cytoplasmic membrane-bounded vesicle	-	-	gi|226529105|ref|NP_001150196.1|/0/cysteine protease 1 [Zea mays]	GRMZM2G340065
AC231180.2_FG006	229	54.83	88	21.07	337	80.68	seq=gene; coord=8:74957960..74959587:1;IPR011050:Pectin lyase fold/virulence factor	GO:0016023//cytoplasmic membrane-bounded vesicle	-	-	gi|226509250|ref|NP_001149385.1|/0/LOC100283011 [Zea mays]	AC231180.2_FG006
GRMZM2G302832	1	0.24	2	0.48	1	0.24	seq=gene; coord=1:195267304..195271027:1;IPR005475:Transketolase, central region;IPR005475:Transketolase, central region;	GO:0005739//mitochondrion;GO:0005739//mitochondrion	GO:0050661//NADP or NADPH binding;GO:0004739//pyruvate dehydrogenase (acetyl-transferring) activity;GO:0004616//phosphogluconate dehydrogenase (decarboxylating) activity;GO:0050661//NADP or NADPH binding;GO:0004739//pyruvate dehydrogenase (acetyl-transferring) activity;GO:0004616//phosphogluconate dehydrogenase (decarboxylating) activity	GO:0055114//oxidation reduction;GO:0006098//pentose-phosphate shunt;GO:0055114//oxidation reduction;GO:0006098//pentose-phosphate shunt	gi|162464059|ref|NP_001104914.1|/9.9056e-129/pyruvate dehydrogenase2 [Zea mays]	GRMZM2G302832
GRMZM2G085246	229	54.83	42	10.06	25	5.99	seq=gene; coord=9:102461168..102469719:-1;IPR011009:Protein kinase-like;IPR001245:Tyrosine protein kinase;IPR002290:Serine/threonine protein kinase;IPR011009:Protein kinase-like;IPR013210:Leucine-rich repeat, N-terminal;IPR001611:Leucine-rich repeat;IPR011009:Protein kinase-like;	GO:0016020//membrane;GO:0016023//cytoplasmic membrane-bounded vesicle;GO:0005739//mitochondrion;GO:0016020//membrane;GO:0016023//cytoplasmic membrane-bounded vesicle;GO:0005739//mitochondrion;GO:0016020//membrane;GO:0016023//cytoplasmic membrane-bounded vesicle;GO:0005739//mitochondrion	-	-	gi|242093828|ref|XP_002437404.1|/1.03625e-64/hypothetical protein SORBIDRAFT_10g026340 [Sorghum bicolor]	GRMZM2G085246
GRMZM2G002135	54	12.93	31	7.42	21	5.03	seq=gene; coord=8:158591608..158595193:1;IPR000872:Tafazzin;IPR002123:Phospholipid/glycerol acyltransferase;IPR000872:Tafazzin;	-	-	-	gi|226500266|ref|NP_001150818.1|/4.84805e-115/acyltransferase [Zea mays]	GRMZM2G002135
GRMZM2G010884	36	8.62	75	17.96	31	7.42	seq=gene; coord=9:99394886..99396754:-1;IPR000565:DNA topoisomerase, type IIA, subunit B;IPR001344:Chlorophyll A-B binding protein;IPR001344:Chlorophyll A-B binding protein;	GO:0009523//photosystem II;GO:0016021//integral to membrane;GO:0009507//chloroplast;GO:0009579//thylakoid;GO:0009522//photosystem I;GO:0005739//mitochondrion;GO:0009523//photosystem II;GO:0016021//integral to membrane;GO:0009507//chloroplast;GO:0009579//thylakoid;GO:0009522//photosystem I;GO:0005739//mitochondrion	GO:0000287//magnesium ion binding;GO:0016168//chlorophyll binding;GO:0000287//magnesium ion binding;GO:0016168//chlorophyll binding	GO:0009765//photosynthesis, light harvesting;GO:0018298//protein-chromophore linkage;GO:0009765//photosynthesis, light harvesting;GO:0018298//protein-chromophore linkage	gi|195613254|gb|ACG28457.1|/3.92735e-141/chlorophyll a-b binding protein 8 [Zea mays]	GRMZM2G010884
GRMZM2G137582	22	5.27	162	38.79	124	29.69	seq=gene; coord=6:102383220..102386229:-1;IPR001810:Cyclin-like F-box;IPR006553:Leucine-rich repeat, cysteine-containing subtype;IPR003590:Leucine-rich repeat, ribonuclease inhibitor subtype;	-	-	-	gi|226505408|ref|NP_001147557.1|/0/LOC100281166 [Zea mays]	GRMZM2G137582
GRMZM2G006226	0	0	6	1.44	22	5.27	seq=gene; coord=1:32740039..32742990:-1;IPR002885:Pentatricopeptide repeat;	-	-	-	gi|108707104|gb|ABF94899.1|/0/pentatricopeptide, putative, expressed [Oryza sativa (japonica cultivar-group)]	GRMZM2G006226
GRMZM2G146313	16	3.83	6	1.44	16	3.83	seq=gene; coord=9:137070666..137075059:1	-	-	-	gi|293336602|ref|NP_001168579.1|/0/hypothetical protein LOC100382363 [Zea mays]	GRMZM2G146313
GRMZM2G144581	265	63.45	171	40.94	337	80.68	seq=gene; coord=5:126888326..126891875:1;IPR018169:MtN3 and saliva related transmembrane protein, conserved region;IPR005384:Duffy antigen/chemokine receptor;IPR018169:MtN3 and saliva related transmembrane protein, conserved region;IPR018169:MtN3 and saliva related transmembrane protein, conserved region;IPR018169:MtN3 and saliva related transmembrane protein, conserved region;IPR018169:MtN3 and …	GO:0016020//membrane;GO:0016020//membrane;GO:0016020//membrane;GO:0016020//membrane;GO:0016020//membrane;GO:0016020//membrane	-	-	gi|223947341|gb|ACN27754.1|/6.87811e-100/unknown [Zea mays]	GRMZM2G144581
GRMZM2G399067	5	1.2	12	2.87	3	0.72	seq=gene; coord=4:170689940..170696517:-1;IPR002290:Serine/threonine protein kinase;IPR011009:Protein kinase-like;	-	GO:0004252//serine-type endopeptidase activity	-	gi|212275017|ref|NP_001130868.1|/1.91885e-85/hypothetical protein LOC100191972 [Zea mays]	GRMZM2G399067
GRMZM2G173641	69	16.52	171	40.94	126	30.17	seq=gene; coord=9:20388417..20394169:-1	-	-	-	gi|242094640|ref|XP_002437810.1|/0/hypothetical protein SORBIDRAFT_10g002960 [Sorghum bicolor]	GRMZM2G173641
GRMZM2G038335	16	3.83	2	0.48	62	14.84	seq=gene; coord=4:231881222..231882273:1;IPR011016:Zinc finger, RING-CH-type;IPR001841:Zinc finger, RING-type;	-	-	-	gi|195650399|gb|ACG44667.1|/4.13292e-84/RING-H2 finger protein ATL1N precursor [Zea mays]	GRMZM2G038335
GRMZM2G170567	3	0.72	14	3.35	10	2.39	seq=gene; coord=1:9504635..9523240:1;IPR008081:Cytoplasmic FMR1-interacting;	-	-	-	gi|218192076|gb|EEC74503.1|/0/hypothetical protein OsI_09982 [Oryza sativa Indica Group]	GRMZM2G170567
GRMZM2G148985	300	71.83	170	40.7	145	34.72	seq=gene; coord=8:173006933..173012990:1	-	-	GO:0050794//regulation of cellular process;GO:0050794//regulation of cellular process	gi|226491944|ref|NP_001149211.1|/4.8247e-49/heat- and acid-stable phosphoprotein [Zea mays]	GRMZM2G148985
GRMZM2G444438	132	31.6	163	39.02	136	32.56	seq=gene; coord=6:108981502..108986424:1	-	-	-	gi|218197720|gb|EEC80147.1|/0/hypothetical protein OsI_21951 [Oryza sativa Indica Group]	GRMZM2G444438
GRMZM2G135990	2	0.48	3	0.72	1	0.24	seq=gene; coord=2:140602051..140603406:-1	-	-	-	gi|226508408|ref|NP_001142440.1|/1.88038e-121/hypothetical protein LOC100274630 [Zea mays]	GRMZM2G135990
GRMZM2G058498	3	0.72	14	3.35	10	2.39	seq=gene; coord=10:58976650..58983189:-1;IPR001680:WD40 repeat;IPR000169:Peptidase, cysteine peptidase active site;IPR011046:WD40 repeat-like;	GO:0009536//plastid	-	-	gi|226508590|ref|NP_001150048.1|/2.51445e-165/rae1-like protein [Zea mays]	GRMZM2G058498
GRMZM2G147452	4	0.96	2	0.48	2	0.48	seq=gene; coord=4:200939877..200942379:-1;IPR007053:NC;IPR017441:Protein kinase, ATP binding site;	GO:0005739//mitochondrion;GO:0005739//mitochondrion	-	-	gi|242079725|ref|XP_002444631.1|/1.55243e-64/hypothetical protein SORBIDRAFT_07g025110 [Sorghum bicolor]	GRMZM2G147452
GRMZM2G009048	110	26.34	150	35.91	72	17.24	seq=gene; coord=10:16424750..16425749:1;IPR000104:Antifreeze protein, type I;IPR008796:Photosystem I reaction centre subunit N;	GO:0009522//photosystem I;GO:0042651//thylakoid membrane	GO:0005515//protein binding	GO:0015979//photosynthesis	gi|259490749|ref|NP_001159046.1|/3.73684e-55/photosystem I reaction center subunit N [Zea mays]	GRMZM2G009048
GRMZM2G378770	4	0.96	64	15.32	2	0.48	seq=gene; coord=6:85493001..85493862:1;IPR001813:Ribosomal protein 60S;	GO:0005622//intracellular	-	-	gi|226502240|ref|NP_001147388.1|/1.36066e-28/60S acidic ribosomal protein P3 [Zea mays]	GRMZM2G378770
GRMZM2G340020	12	2.87	53	12.69	58	13.89	seq=gene; coord=6:159626385..159627997:-1;IPR003591:Leucine-rich repeat, typical subtype;IPR001611:Leucine-rich repeat;	-	-	-	gi|242091197|ref|XP_002441431.1|/8.00665e-147/hypothetical protein SORBIDRAFT_09g026470 [Sorghum bicolor]	GRMZM2G340020
GRMZM2G115480	1	0.24	2	0.48	0	0	seq=gene; coord=5:168306716..168315592:1	-	-	-	gi|226492702|ref|NP_001142587.1|/1.40298e-53/hypothetical protein LOC100274851 [Zea mays]	GRMZM2G115480
GRMZM2G099130	127	30.41	123	29.45	72	17.24	seq=gene; coord=2:18430128..18434653:-1;IPR013256:Chromatin SPT2;	-	-	-	gi|242076744|ref|XP_002448308.1|/0/hypothetical protein SORBIDRAFT_06g024990 [Sorghum bicolor]	GRMZM2G099130
GRMZM2G433433	64	15.32	41	9.82	32	7.66	seq=gene; coord=9:20741202..20742911:1;IPR001245:Tyrosine protein kinase;IPR002290:Serine/threonine protein kinase;IPR003613:U box;IPR017441:Protein kinase, ATP binding site;IPR008271:Serine/threonine protein kinase, active site;IPR011009:Protein kinase-like;IPR017442:Serine/threonine protein kinase-related;	-	GO:0005515//protein binding;GO:0004713//protein tyrosine kinase activity;GO:0005524//ATP binding;GO:0004674//protein serine/threonine kinase activity	GO:0006468//protein amino acid phosphorylation	gi|242094614|ref|XP_002437797.1|/1.59248e-175/hypothetical protein SORBIDRAFT_10g002760 [Sorghum bicolor]	GRMZM2G433433
GRMZM2G063216	66	15.8	61	14.6	67	16.04	seq=gene; coord=4:183702410..183706023:-1;IPR003657:DNA-binding WRKY;IPR003657:DNA-binding WRKY;IPR003657:DNA-binding WRKY;	-	-	-	gi|212722988|ref|NP_001131395.1|/4.29924e-25/hypothetical protein LOC100192722 [Zea mays]	GRMZM2G063216
GRMZM2G320373	46	11.01	115	27.53	64	15.32	seq=gene; coord=6:162765403..162766230:1;IPR000104:Antifreeze protein, type I;IPR016140:Bifunctional inhibitor/plant lipid transfer protein/seed storage;IPR003612:Plant lipid transfer protein/seed storage/trypsin-alpha amylase inhibitor;	GO:0016023//cytoplasmic membrane-bounded vesicle	-	-	gi|226503631|ref|NP_001152727.1|/6.33918e-36/nonspecific lipid-transfer protein AKCS9 [Zea mays]	GRMZM2G320373
GRMZM2G041955	4	0.96	1	0.24	3	0.72	seq=gene; coord=1:43273270..43276190:1;IPR002885:Pentatricopeptide repeat;	-	-	-	gi|242036089|ref|XP_002465439.1|/0/hypothetical protein SORBIDRAFT_01g038860 [Sorghum bicolor]	GRMZM2G041955
GRMZM2G024708	6	1.44	3	0.72	0	0	seq=gene; coord=2:204770421..204772562:-1;IPR003663:Sugar/inositol transporter;IPR005829:Sugar transporter, conserved site;IPR016196:Major facilitator superfamily, general substrate transporter;IPR005828:General substrate transporter;IPR011701:Major facilitator superfamily MFS-1;IPR005829:Sugar transporter, conserved site;IPR016196:Major facilitator superfamily, general substrate transporter;	GO:0016023//cytoplasmic membrane-bounded vesicle;GO:0016020//membrane;GO:0016023//cytoplasmic membrane-bounded vesicle;GO:0016020//membrane	GO:0005351//sugar:hydrogen symporter activity;GO:0005351//sugar:hydrogen symporter activity	GO:0008643//carbohydrate transport;GO:0008643//carbohydrate transport	gi|195626628|gb|ACG35144.1|/4.32996e-115/proton myo-inositol cotransporter [Zea mays]	GRMZM2G024708
GRMZM2G478430	23	5.51	9	2.15	39	9.34	seq=gene; coord=10:114152391..114153234:-1	-	-	-	-	GRMZM2G478430
GRMZM2G135617	115	27.53	21	5.03	64	15.32	seq=gene; coord=1:194596194..194599394:1;IPR002912:Amino acid-binding ACT;	-	-	-	gi|226501350|ref|NP_001147811.1|/0/ACR4 [Zea mays]	GRMZM2G135617
GRMZM2G382273	2	0.48	1	0.24	5	1.2	seq=gene; coord=7:30445255..30450290:1;IPR001611:Leucine-rich repeat;IPR002182:NB-ARC;	-	-	-	gi|242043640|ref|XP_002459691.1|/0/hypothetical protein SORBIDRAFT_02g008880 [Sorghum bicolor]	GRMZM2G382273
GRMZM2G085547	62	14.84	63	15.08	116	27.77	seq=gene; coord=4:169312670..169319688:1;IPR001576:Phosphoglycerate kinase;IPR006652:Kelch repeat type 1;IPR011043:Galactose oxidase/kelch, beta-propeller;IPR011498:Kelch repeat type 2;IPR006651:Kelch;IPR006652:Kelch repeat type 1;IPR011043:Galactose oxidase/kelch, beta-propeller;IPR011498:Kelch repeat type 2;IPR001576:Phosphoglycerate kinase;IPR006652:Kelch repeat type 1;IPR011043:Galactose oxid…	-	-	-	gi|242067032|ref|XP_002454805.1|/2.36103e-161/hypothetical protein SORBIDRAFT_04g037760 [Sorghum bicolor]	GRMZM2G085547
GRMZM2G472770	9	2.15	112	26.81	74	17.72	seq=gene; coord=2:132294477..132300920:1	-	-	-	gi|242070263|ref|XP_002450408.1|/0/hypothetical protein SORBIDRAFT_05g004840 [Sorghum bicolor]	GRMZM2G472770
GRMZM2G097511	1	0.24	0	0	0	0	seq=gene; coord=2:224977472..224979165:-1;IPR002119:Histone H2A;IPR009072:Histone-fold;IPR007125:Histone core;IPR002119:Histone H2A;IPR009072:Histone-fold;IPR007125:Histone core;	GO:0043229//intracellular organelle	GO:0003677//DNA binding;GO:0005515//protein binding;GO:0003677//DNA binding	GO:0006334//nucleosome assembly;GO:0006334//nucleosome assembly	gi|293334481|ref|NP_001169736.1|/2.19141e-52/hypothetical protein LOC100383617 [Zea mays]	GRMZM2G097511
GRMZM2G002297	45	10.77	36	8.62	8	1.92	seq=gene; coord=8:147522511..147530178:-1	-	-	-	gi|226528976|ref|NP_001145465.1|/8.0907e-87/hypothetical protein LOC100278854 [Zea mays]	GRMZM2G002297
GRMZM2G014454	12	2.87	22	5.27	41	9.82	seq=gene; coord=3:179927246..179929034:1	GO:0016020//membrane	-	-	gi|242059169|ref|XP_002458730.1|/2.423e-122/hypothetical protein SORBIDRAFT_03g039220 [Sorghum bicolor]	GRMZM2G014454
GRMZM2G112790	0	0	1	0.24	0	0	seq=gene; coord=5:161923165..161926121:-1;IPR008999:Actin_cross-linking;IPR007679:Protein of unknown function DUF569;	-	-	-	gi|242037749|ref|XP_002466269.1|/1.93269e-39/hypothetical protein SORBIDRAFT_01g004790 [Sorghum bicolor]	GRMZM2G112790
GRMZM2G377686	3	0.72	2	0.48	5	1.2	seq=gene; coord=4:101204160..101207623:1	-	-	-	gi|242061472|ref|XP_002452025.1|/1.55393e-161/hypothetical protein SORBIDRAFT_04g016320 [Sorghum bicolor]	GRMZM2G377686
GRMZM2G000660	8	1.92	33	7.9	29	6.94	seq=gene; coord=3:229175473..229178808:1;IPR000340:Protein-tyrosine phosphatase, dual specificity;	-	GO:0008138//protein tyrosine/serine/threonine phosphatase activity	GO:0006470//protein amino acid dephosphorylation	gi|223944219|gb|ACN26193.1|/4.19209e-159/unknown [Zea mays]	GRMZM2G000660
GRMZM2G309624	0	0	26	6.22	0	0	seq=gene; coord=5:235289..239277:-1;IPR001965:Zinc finger, PHD-type;IPR011011:Zinc finger, FYVE/PHD-type;IPR009057:Homeodomain-like;	-	-	-	gi|218185299|gb|EEC67726.1|/5.8374e-139/hypothetical protein OsI_35213 [Oryza sativa Indica Group]	GRMZM2G309624
GRMZM2G323470	118	28.25	169	40.46	133	31.84	seq=gene; coord=4:183528396..183545110:1	-	-	-	gi|226528060|ref|NP_001141430.1|/0/hypothetical protein LOC100273540 [Zea mays]	GRMZM2G323470
GRMZM2G059634	26	6.23	15	3.59	15	3.59	seq=gene; coord=6:118288004..118291431:-1;IPR003982:Leukotriene B4 type 2 receptor;IPR002902:Protein of unknown function DUF26;	-	-	-	gi|242095366|ref|XP_002438173.1|/5.26324e-110/hypothetical protein SORBIDRAFT_10g009120 [Sorghum bicolor]	GRMZM2G059634
AC205730.3_FG002	2	0.48	0	0	3	0.72	seq=gene; coord=1:166195680..166212199:-1	-	-	-	gi|222617395|gb|EEE53527.1|/4.55879e-118/hypothetical protein OsJ_36721 [Oryza sativa Japonica Group]	AC205730.3_FG002
GRMZM2G145632	1	0.24	4	0.96	8	1.92	seq=gene; coord=8:95977221..95978886:1	-	-	-	gi|238013126|gb|ACR37598.1|/1.26321e-94/unknown [Zea mays]	GRMZM2G145632
GRMZM2G179120	145	34.72	171	40.94	132	31.6	seq=gene; coord=2:172954409..172957471:1;IPR001199:Cytochrome b5;IPR012171:Fatty acid/sphingolipid desaturase;IPR005804:Fatty acid desaturase, type 1;IPR001199:Cytochrome b5;IPR012171:Fatty acid/sphingolipid desaturase;IPR005804:Fatty acid desaturase, type 1;	-	-	-	gi|226492529|ref|NP_001145881.1|/0/hypothetical protein LOC100279397 [Zea mays]	GRMZM2G179120
GRMZM2G356639	1093	261.69	21	5.03	12	2.87	seq=gene; coord=4:110500307..110504989:-1	GO:0016023//cytoplasmic membrane-bounded vesicle;GO:0005747//mitochondrial respiratory chain complex I;GO:0016023//cytoplasmic membrane-bounded vesicle;GO:0005747//mitochondrial respiratory chain complex I	GO:0008137//NADH dehydrogenase (ubiquinone) activity;GO:0008137//NADH dehydrogenase (ubiquinone) activity	GO:0042773//ATP synthesis coupled electron transport;GO:0042773//ATP synthesis coupled electron transport	gi|94502712|ref|YP_588266.1|/2.03933e-59/NADH dehydrogenase subunit 2 [Zea mays subsp. mays]	GRMZM2G356639
GRMZM2G106164	6	1.44	6	1.44	15	3.59	seq=gene; coord=4:30525244..30527316:-1;IPR014946:Protein of unknown function DUF1817;IPR014946:Protein of unknown function DUF1817;	GO:0005739//mitochondrion;GO:0009536//plastid;GO:0005739//mitochondrion;GO:0009536//plastid	-	-	gi|226529603|ref|NP_001141945.1|/1.08181e-100/hypothetical protein LOC100274094 [Zea mays]	GRMZM2G106164
GRMZM2G414540	8	1.92	0	0	0	0	seq=gene; coord=1:284698863..284700286:1;IPR010989:t-SNARE;IPR006011:Syntaxin, N-terminal;IPR000727:Target SNARE coiled-coil region;IPR006012:Syntaxin/epimorphin, conserved site;	GO:0016020//membrane	GO:0005484//SNAP receptor activity	GO:0016192//vesicle-mediated transport;GO:0006886//intracellular protein transport	gi|226532198|ref|NP_001150776.1|/1.38008e-139/syntaxin 121 [Zea mays]	GRMZM2G414540
GRMZM2G021549	9	2.15	47	11.25	48	11.49	seq=gene; coord=6:164657478..164664538:-1	-	-	-	gi|242091373|ref|XP_002441519.1|/0/hypothetical protein SORBIDRAFT_09g028510 [Sorghum bicolor]	GRMZM2G021549
GRMZM2G400725	1	0.24	9	2.15	0	0	seq=gene; coord=9:41319382..41321986:-1	GO:0016023//cytoplasmic membrane-bounded vesicle;GO:0016020//membrane	-	-	gi|28564585|dbj|BAC57694.1|/0/putative receptor-like protein kinase [Oryza sativa Japonica Group]	GRMZM2G400725
GRMZM2G057296	48	11.49	72	17.24	71	17	seq=gene; coord=7:26579578..26583018:-1;IPR006626:Parallel beta-helix repeat;IPR011050:Pectin lyase fold/virulence factor;IPR000743:Glycoside hydrolase, family 28;	GO:0016023//cytoplasmic membrane-bounded vesicle	-	-	gi|238009236|gb|ACR35653.1|/0/unknown [Zea mays]	GRMZM2G057296
GRMZM2G012724	15	3.59	10	2.39	6	1.44	seq=gene; coord=6:141602428..141604628:-1;IPR003657:DNA-binding WRKY;IPR003657:DNA-binding WRKY;IPR003657:DNA-binding WRKY;IPR003657:DNA-binding WRKY;	-	-	-	gi|226533536|ref|NP_001147949.1|/1.8173e-140/WRKY53 - superfamily of TFs having WRKY and zinc finger domains [Zea mays]	GRMZM2G012724
GRMZM2G426802	18	4.31	50	11.97	36	8.62	seq=gene; coord=1:3337175..3341894:-1;IPR001680:WD40 repeat;IPR011046:WD40 repeat-like;	-	-	-	gi|226507556|ref|NP_001147943.1|/0/signal transducer [Zea mays]	GRMZM2G426802
GRMZM2G148930	1	0.24	1	0.24	3	0.72	seq=gene; coord=9:132430997..132432159:-1;IPR009798:Wound-induced protein, Wun1;	-	-	-	gi|212723072|ref|NP_001131159.1|/8.17199e-76/hypothetical protein LOC100192467 [Zea mays]	GRMZM2G148930
GRMZM2G138338	0	0	1	0.24	0	0	seq=gene; coord=3:143580703..143584537:-1;IPR003591:Leucine-rich repeat, typical subtype;IPR001245:Tyrosine protein kinase;IPR002290:Serine/threonine protein kinase;IPR017441:Protein kinase, ATP binding site;IPR011009:Protein kinase-like;IPR013210:Leucine-rich repeat, N-terminal;IPR001611:Leucine-rich repeat;	-	-	-	gi|224029487|gb|ACN33819.1|/0/unknown [Zea mays]	GRMZM2G138338
GRMZM2G127648	78	18.68	42	10.06	110	26.34	seq=gene; coord=6:159128940..159132956:-1;IPR001806:Ras GTPase;IPR001019:Guanine nucleotide binding protein (G-protein), alpha subunit;IPR001401:Dynamin, GTPase region;IPR002030:Mitochondrial brown fat uncoupling protein;IPR005225:Small GTP-binding protein;IPR013684:Miro-like;IPR013753:Ras;IPR006688:ADP-ribosylation factor;IPR003577:Ras small GTPase, Ras type;IPR003579:Ras small GTPase, Rab type;…	-	GO:0003677//DNA binding;GO:0005525//GTP binding	GO:0015031//protein transport;GO:0007264//small GTPase mediated signal transduction	gi|226492842|ref|NP_001148331.1|/3.4782e-117/ras-related protein RIC2 [Zea mays]	GRMZM2G127648
GRMZM2G089688	610	146.05	424	101.51	497	118.99	seq=gene; coord=6:31001429..31003890:1;IPR010742:Rab5-interacting;IPR010742:Rab5-interacting;	-	-	-	gi|223949947|gb|ACN29057.1|/4.42453e-25/unknown [Zea mays]	GRMZM2G089688
GRMZM2G056079	7	1.68	8	1.92	4	0.96	seq=gene; coord=8:66498977..66504727:1	-	-	-	gi|212275558|ref|NP_001130496.1|/2.95158e-88/hypothetical protein LOC100191594 [Zea mays]	GRMZM2G056079
GRMZM2G085733	6	1.44	8	1.92	4	0.96	seq=gene; coord=2:154669919..154699846:1;IPR004102:Poly(ADP-ribose) polymerase, regulatory region;IPR001357:BRCT;IPR001510:Zinc finger, PARP-type;IPR012982:PADR1;IPR008893:WGR;	GO:0005634//nucleus	GO:0051287//NAD or NADH binding;GO:0003677//DNA binding;GO:0003950//NAD+ ADP-ribosyltransferase activity;GO:0008270//zinc ion binding	GO:0006471//protein amino acid ADP-ribosylation	gi|75216547|sp|Q9ZSV1.1|PARP1_MAIZE/0/RecName: Full=Poly [ADP-ribose] polymerase 1; Short=PARP-1; AltName: Full=NAD(+) ADP-ribosyltransferase 1; Short=ADPRT-1; AltName: Full=Poly[ADP-ribose] synthase 1	GRMZM2G085733
GRMZM2G050591	3	0.72	0	0	1	0.24	seq=gene; coord=6:11305359..11309242:-1;IPR004254:Hly-III related;	-	-	-	gi|238014870|gb|ACR38470.1|/0/unknown [Zea mays]	GRMZM2G050591
GRMZM2G135277	658	157.54	359	85.95	445	106.54	seq=gene; coord=2:33443786..33447532:1;IPR002347:Glucose/ribitol dehydrogenase;IPR002198:Short-chain dehydrogenase/reductase SDR;IPR003560:2,3-dihydro-2,3-dihydroxybenzoate dehydrogenase;IPR002424:Insect alcohol dehydrogenase family;IPR016040:NAD(P)-binding;IPR013968:Polyketide synthase, KR;IPR002347:Glucose/ribitol dehydrogenase;IPR003560:2,3-dihydro-2,3-dihydroxybenzoate dehydrogenase;IPR002198…	-	-	-	gi|293336969|ref|NP_001169234.1|/1.11093e-79/hypothetical protein LOC100383092 [Zea mays]	GRMZM2G135277
GRMZM2G394027	6	1.44	19	4.55	17	4.07	seq=gene; coord=7:127321497..127326933:1;IPR003992:Pertactin virulence factor, N-terminal;	-	-	-	gi|226501454|ref|NP_001145696.1|/0/hypothetical protein LOC100279200 [Zea mays]	GRMZM2G394027
GRMZM2G161780	185	44.29	323	77.33	164	39.26	seq=gene; coord=1:29256571..29262210:1;IPR004254:Hly-III related;	-	-	-	gi|242041679|ref|XP_002468234.1|/0/hypothetical protein SORBIDRAFT_01g042200 [Sorghum bicolor]	GRMZM2G161780
GRMZM2G369814	25	5.99	89	21.31	97	23.22	seq=gene; coord=2:212627993..212632705:1;IPR000104:Antifreeze protein, type I;IPR008351:JNK MAP kinase;IPR017441:Protein kinase, ATP binding site;IPR008271:Serine/threonine protein kinase, active site;IPR001245:Tyrosine protein kinase;IPR002290:Serine/threonine protein kinase;IPR011009:Protein kinase-like;IPR017442:Serine/threonine protein kinase-related;	GO:0009536//plastid	GO:0005524//ATP binding;GO:0004674//protein serine/threonine kinase activity	GO:0006468//protein amino acid phosphorylation	gi|293333845|ref|NP_001170286.1|/0/hypothetical protein LOC100384249 [Zea mays]	GRMZM2G369814
AC192244.3_FG008	25	5.99	73	17.48	63	15.08	seq=gene; coord=5:75525122..75528960:1;IPR003980:Histamine H3 receptor	GO:0005739//mitochondrion;GO:0009536//plastid	-	-	gi|212275758|ref|NP_001130250.1|/9.73585e-165/hypothetical protein LOC100191344 [Zea mays]	AC192244.3_FG008
GRMZM2G012861	56	13.41	1	0.24	99	23.7	seq=gene; coord=3:2725738..2730518:1;IPR000104:Antifreeze protein, type I;IPR003071:Orphan nuclear receptor, HMR type;IPR017859:Treacher Collins Syndrome, treacle-like;IPR000104:Antifreeze protein, type I;IPR003071:Orphan nuclear receptor, HMR type;IPR017859:Treacher Collins Syndrome, treacle-like;IPR001245:Tyrosine protein kinase;IPR003505:Glial cell line-derived neurotrophic factor receptor, al…	GO:0016023//cytoplasmic membrane-bounded vesicle	GO:0004672//protein kinase activity;GO:0005524//ATP binding;GO:0004672//protein kinase activity;GO:0005524//ATP binding;GO:0004672//protein kinase activity;GO:0005524//ATP binding	GO:0006468//protein amino acid phosphorylation;GO:0006468//protein amino acid phosphorylation;GO:0006468//protein amino acid phosphorylation	gi|7573610|dbj|BAA94519.1|/0/putative receptor-like kinase [Oryza sativa Japonica Group]	GRMZM2G012861
GRMZM2G097048	0	0	1	0.24	1	0.24	seq=gene; coord=4:76220927..76223269:-1	-	-	-	gi|293332085|ref|NP_001170722.1|/1.22432e-59/hypothetical protein LOC100384805 [Zea mays]	GRMZM2G097048
GRMZM2G073609	78	18.68	103	24.66	95	22.74	seq=gene; coord=5:216663571..216664750:-1	GO:0016023//cytoplasmic membrane-bounded vesicle	-	-	gi|226532670|ref|NP_001143408.1|/2.95657e-112/hypothetical protein LOC100276052 [Zea mays]	GRMZM2G073609
GRMZM2G067675	151	36.15	126	30.17	127	30.41	seq=gene; coord=8:17344211..17349377:-1;IPR001245:Tyrosine protein kinase;IPR011009:Protein kinase-like;IPR013210:Leucine-rich repeat, N-terminal;IPR001611:Leucine-rich repeat;IPR017442:Serine/threonine protein kinase-related;IPR017441:Protein kinase, ATP binding site;IPR008271:Serine/threonine protein kinase, active site;IPR003591:Leucine-rich repeat, typical subtype;IPR002290:Serine/threonine p…	GO:0016023//cytoplasmic membrane-bounded vesicle;GO:0016023//cytoplasmic membrane-bounded vesicle	-	-	gi|293332835|ref|NP_001169689.1|/0/hypothetical protein LOC100383570 [Zea mays]	GRMZM2G067675
GRMZM2G074604	87	20.83	117	28.01	299	71.59	seq=gene; coord=5:185858700..185862441:-1;IPR004058:Zeta tubulin;IPR005922:Phenylalanine ammonia-lyase;IPR008948:L-Aspartase-like;IPR001106:Phenylalanine/histidine ammonia-lyase;IPR005922:Phenylalanine ammonia-lyase;IPR008948:L-Aspartase-like;IPR001106:Phenylalanine/histidine ammonia-lyase;IPR008948:L-Aspartase-like;	GO:0005737//cytoplasm;GO:0005737//cytoplasm;GO:0005737//cytoplasm	GO:0045548//phenylalanine ammonia-lyase activity;GO:0016211//ammonia ligase activity;GO:0045548//phenylalanine ammonia-lyase activity;GO:0016211//ammonia ligase activity;GO:0045548//phenylalanine ammonia-lyase activity;GO:0016211//ammonia ligase activity	GO:0009698//phenylpropanoid metabolic process;GO:0009058//biosynthetic process;GO:0006559//L-phenylalanine catabolic process;GO:0009698//phenylpropanoid metabolic process;GO:0009058//biosynthetic process;GO:0006559//L-phenylalanine catabolic process;GO:0009698//phenylpropanoid metabolic process;GO:0009058//biosynthetic process;GO:0006559//L-phenylalanine catabolic process	gi|219886341|gb|ACL53545.1|/0/unknown [Zea mays]	GRMZM2G074604
GRMZM2G074414	29	6.94	32	7.66	47	11.25	seq=gene; coord=4:245249279..245252492:1;IPR011053:Single hybrid motif;	-	-	-	gi|222622066|gb|EEE56198.1|/1.4721e-77/hypothetical protein OsJ_05157 [Oryza sativa Japonica Group]	GRMZM2G074414
AC207798.2_FG003	0	0	1	0.24	0	0	seq=gene; coord=6:128724676..128725986:1	-	-	-	gi|121701685|ref|XP_001269107.1|/7.13879e-07/conserved proline-rich protein [Aspergillus clavatus NRRL 1]	AC207798.2_FG003
GRMZM2G096391	163	39.03	205	49.08	142	34	seq=gene; coord=3:166654867..166663425:1;IPR001763:Rhodanese-like;	-	-	-	gi|238009964|gb|ACR36017.1|/0/unknown [Zea mays]	GRMZM2G096391
GRMZM2G112240	199	47.65	347	83.08	366	87.63	seq=gene; coord=4:170005783..170009304:1;IPR006186:Serine/threonine-specific protein phosphatase and bis(5-nucleosyl)-tetraphosphatase;IPR004843:Metallophosphoesterase;IPR006186:Serine/threonine-specific protein phosphatase and bis(5-nucleosyl)-tetraphosphatase;IPR004843:Metallophosphoesterase;	GO:0008287//protein serine/threonine phosphatase complex;GO:0008287//protein serine/threonine phosphatase complex	GO:0030145//manganese ion binding;GO:0004722//protein serine/threonine phosphatase activity;GO:0005506//iron ion binding;GO:0030145//manganese ion binding;GO:0004722//protein serine/threonine phosphatase activity;GO:0005506//iron ion binding	GO:0006470//protein amino acid dephosphorylation;GO:0006470//protein amino acid dephosphorylation	gi|162462902|ref|NP_001105341.1|/0/ser/thr protein phosphatase1 [Zea mays]	GRMZM2G112240
GRMZM2G447847	0	0	103	24.66	0	0	seq=gene; coord=2:4915458..4921030:-1;IPR016027:Nucleic acid-binding, OB-fold-like;	-	-	-	gi|242093032|ref|XP_002437006.1|/1.37992e-167/hypothetical protein SORBIDRAFT_10g016776 [Sorghum bicolor]	GRMZM2G447847
GRMZM2G075715	0	0	0	0	1	0.24	seq=gene; coord=7:41934713..41941364:1;IPR001680:WD40 repeat;IPR011046:WD40 repeat-like;IPR010525:Auxin response factor;	GO:0009536//plastid	-	-	gi|242074738|ref|XP_002447305.1|/3.52951e-54/hypothetical protein SORBIDRAFT_06g032500 [Sorghum bicolor]	GRMZM2G075715
GRMZM2G128895	98	23.46	58	13.89	111	26.58	seq=gene; coord=3:41888287..41895991:1;IPR002005:Rab GTPase activator;IPR016664:Rab protein geranylgeranyltransferase component A, eukaryota;IPR018203:GDP dissociation inhibitor;	-	-	-	gi|222618169|gb|EEE54301.1|/0/hypothetical protein OsJ_01236 [Oryza sativa Japonica Group]	GRMZM2G128895
GRMZM2G438456	1	0.24	3	0.72	3	0.72	seq=gene; coord=2:231899716..231902235:1;IPR002885:Pentatricopeptide repeat;	-	-	-	gi|242042646|ref|XP_002459194.1|/0/hypothetical protein SORBIDRAFT_02g000310 [Sorghum bicolor]	GRMZM2G438456
GRMZM2G438195	3	0.72	4	0.96	2	0.48	seq=gene; coord=10:141463084..141464810:-1	-	-	-	gi|238010054|gb|ACR36062.1|/1.06774e-27/unknown [Zea mays]	GRMZM2G438195
GRMZM2G179793	60	14.37	38	9.1	56	13.41	seq=gene; coord=6:162646799..162650789:1;IPR001328:Peptidyl-tRNA hydrolase;IPR018171:Peptidyl-tRNA hydrolase, conserved site;IPR018171:Peptidyl-tRNA hydrolase, conserved site;IPR001328:Peptidyl-tRNA hydrolase;	GO:0005739//mitochondrion;GO:0005739//mitochondrion;GO:0005739//mitochondrion	GO:0016301//kinase activity;GO:0016301//kinase activity	-	gi|242088699|ref|XP_002440182.1|/3.03001e-27/hypothetical protein SORBIDRAFT_09g027420 [Sorghum bicolor]	GRMZM2G179793
GRMZM2G059958	20	4.79	18	4.31	6	1.44	seq=gene; coord=5:207524046..207526914:-1;IPR001613:Flavin-containing amine oxidase;IPR007526:SWIRM;IPR006076:FAD dependent oxidoreductase;IPR002937:Amine oxidase;	-	-	-	gi|242062486|ref|XP_002452532.1|/0/hypothetical protein SORBIDRAFT_04g027490 [Sorghum bicolor]	GRMZM2G059958
AC204530.4_FG005	6	1.44	1	0.24	20	4.79	seq=gene; coord=1:61691125..61694813:1;IPR006439:HAD-superfamily hydrolase, subfamily IA, variant 1	GO:0005739//mitochondrion	-	-	gi|223949509|gb|ACN28838.1|/1.36627e-60/unknown [Zea mays]	AC204530.4_FG005
GRMZM2G140721	0	0	5	1.2	0	0	seq=gene; coord=6:155762459..155768748:1;IPR001245:Tyrosine protein kinase;IPR008271:Serine/threonine protein kinase, active site;IPR002290:Serine/threonine protein kinase;IPR011009:Protein kinase-like;IPR002902:Protein of unknown function DUF26;IPR017442:Serine/threonine protein kinase-related;	-	-	-	gi|226500408|ref|NP_001146710.1|/0/hypothetical protein LOC100280312 [Zea mays]	GRMZM2G140721
GRMZM2G380184	16	3.83	14	3.35	25	5.99	seq=gene; coord=5:205983803..205986821:-1;IPR016158:Cullin homology;IPR016159:Cullin repeat-like;IPR001373:Cullin, N-terminal region;	-	GO:0005515//protein binding	-	gi|242062528|ref|XP_002452553.1|/0/hypothetical protein SORBIDRAFT_04g027970 [Sorghum bicolor]	GRMZM2G380184
GRMZM2G092517	1	0.24	6	1.44	0	0	seq=gene; coord=3:182372131..182374239:-1;IPR004883:Lateral organ boundaries, LOB;	-	-	-	gi|224033041|gb|ACN35596.1|/5.53184e-109/unknown [Zea mays]	GRMZM2G092517
GRMZM2G003530	22	5.27	29	6.94	35	8.38	seq=gene; coord=1:66614352..66618679:-1	-	-	-	gi|226496856|ref|NP_001145331.1|/0/hypothetical protein LOC100278656 [Zea mays]	GRMZM2G003530
GRMZM2G145753	17	4.07	13	3.11	14	3.35	seq=gene; coord=3:182924082..182927905:1;IPR001245:Tyrosine protein kinase;IPR017441:Protein kinase, ATP binding site;IPR003591:Leucine-rich repeat, typical subtype;IPR002290:Serine/threonine protein kinase;IPR011009:Protein kinase-like;IPR013210:Leucine-rich repeat, N-terminal;IPR001611:Leucine-rich repeat;IPR017442:Serine/threonine protein kinase-related;	GO:0016023//cytoplasmic membrane-bounded vesicle	GO:0004713//protein tyrosine kinase activity;GO:0005524//ATP binding;GO:0004674//protein serine/threonine kinase activity	GO:0006468//protein amino acid phosphorylation	gi|242059081|ref|XP_002458686.1|/0/hypothetical protein SORBIDRAFT_03g038240 [Sorghum bicolor]	GRMZM2G145753
GRMZM2G008066	0	0	0	0	6	1.44	seq=gene; coord=9:124672538..124675504:-1	-	GO:0016740//transferase activity	-	gi|226498744|ref|NP_001147550.1|/1.7993e-47/stachyose synthase [Zea mays]	GRMZM2G008066
GRMZM2G107463	142	34	129	30.88	211	50.52	seq=gene; coord=1:53260883..53265679:-1;IPR001841:Zinc finger, RING-type;IPR001841:Zinc finger, RING-type;	-	-	-	gi|293335195|ref|NP_001169391.1|/0/hypothetical protein LOC100383259 [Zea mays]	GRMZM2G107463
GRMZM2G135526	1	0.24	14	3.35	10	2.39	seq=gene; coord=4:39436703..39439260:-1;IPR011032:GroES-like;IPR013154:Alcohol dehydrogenase GroES-like;IPR013149:Alcohol dehydrogenase, zinc-binding;IPR011032:GroES-like;IPR013154:Alcohol dehydrogenase GroES-like;IPR013149:Alcohol dehydrogenase, zinc-binding;	-	-	-	gi|226531053|ref|NP_001142329.1|/0/hypothetical protein LOC100274499 [Zea mays]	GRMZM2G135526
GRMZM2G086497	258	61.77	204	48.84	417	99.84	seq=gene; coord=5:6781110..6784830:1;IPR018781:Protein of unknown function, transmembrane-40;IPR018781:Protein of unknown function, transmembrane-40;	-	-	-	gi|239046531|ref|NP_001131372.2|/3.70476e-162/hypothetical protein LOC100192697 [Zea mays]	GRMZM2G086497
GRMZM2G018941	677	162.09	901	215.71	631	151.07	seq=gene; coord=1:51116319..51118358:1;IPR006806:ETC complex I subunit;IPR006806:ETC complex I subunit;	-	-	-	gi|223973939|gb|ACN31157.1|/1.8191e-31/unknown [Zea mays]	GRMZM2G018941
GRMZM2G009448	2052	491.31	1672	400.3	2512	601.42	seq=gene; coord=10:17650861..17654593:1;IPR000817:Prion protein;IPR003954:RNA recognition, region 1;IPR000504:RNA recognition motif, RNP-1;IPR000817:Prion protein;	-	-	-	gi|238007748|gb|ACR34909.1|/1.00873e-29/unknown [Zea mays]	GRMZM2G009448
GRMZM2G125839	2	0.48	0	0	0	0	seq=gene; coord=7:126111674..126112360:1	-	-	-	gi|242045126|ref|XP_002460434.1|/4.22026e-58/hypothetical protein SORBIDRAFT_02g028060 [Sorghum bicolor]	GRMZM2G125839
GRMZM2G059799	411	98.4	435	104.15	263	62.97	seq=gene; coord=3:208503806..208506397:1;IPR006015:Universal stress protein A;IPR006016:UspA;IPR001810:Cyclin-like F-box;IPR001810:Cyclin-like F-box;	-	-	-	gi|212723140|ref|NP_001132042.1|/1.01654e-174/hypothetical protein LOC100193452 [Zea mays]	GRMZM2G059799
GRMZM2G072337	84	20.11	29	6.94	376	90.02	seq=gene; coord=10:117371916..117375929:-1;IPR006638:Elongator protein 3/MiaB/NifB;IPR005839:Uncharacterised protein family UPF0004;IPR006466:MiaB-like tRNA modifying enzyme, archaeal-type;IPR013848:Uncharacterised protein family UPF0004, N-terminal;IPR007197:Radical SAM;IPR005839:Uncharacterised protein family UPF0004;IPR013848:Uncharacterised protein family UPF0004, N-terminal;IPR005839:Unchara…	-	GO:0051536//iron-sulfur cluster binding;GO:0051536//iron-sulfur cluster binding	GO:0008152//metabolic process;GO:0008152//metabolic process	gi|194693708|gb|ACF80938.1|/0/unknown [Zea mays]	GRMZM2G072337
GRMZM2G076017	50	11.97	159	38.07	193	46.21	seq=gene; coord=2:184495008..184502616:1;IPR001220:Legume lectin, beta domain;	GO:0009536//plastid	-	-	gi|195651705|gb|ACG45320.1|/3.42227e-74/threonine endopeptidase [Zea mays]	GRMZM2G076017
GRMZM2G062154	226	54.11	14	3.35	223	53.39	seq=gene; coord=3:208104277..208109041:-1;IPR000007:Tubby, C-terminal;IPR018066:Tubby, C-terminal, conserved site;IPR000007:Tubby, C-terminal;IPR018066:Tubby, C-terminal, conserved site;IPR000007:Tubby, C-terminal;IPR018066:Tubby, C-terminal, conserved site;	-	-	-	gi|226491017|ref|NP_001150446.1|/0/tubby protein [Zea mays]	GRMZM2G062154
GRMZM2G067988	1	0.24	0	0	0	0	seq=gene; coord=3:82240201..82241218:-1;IPR018117:C-5 cytosine-specific DNA methylase, active site;	-	-	-	gi|226504944|ref|NP_001145162.1|/1.02079e-79/hypothetical protein LOC100278397 [Zea mays]	GRMZM2G067988
GRMZM2G155499	7	1.68	0	0	11	2.63	seq=gene; coord=4:173935850..173937406:-1;IPR011598:Helix-loop-helix DNA-binding;IPR011598:Helix-loop-helix DNA-binding;	-	-	-	gi|226531534|ref|NP_001142315.1|/3.29653e-70/hypothetical protein LOC100274484 [Zea mays]	GRMZM2G155499
GRMZM2G002492	20	4.79	18	4.31	39	9.34	seq=gene; coord=1:23972196..23976806:-1;IPR001441:Di-trans-poly-cis-decaprenylcistransferase-like;IPR001441:Di-trans-poly-cis-decaprenylcistransferase-like;IPR001441:Di-trans-poly-cis-decaprenylcistransferase-like;IPR001441:Di-trans-poly-cis-decaprenylcistransferase-like;IPR001441:Di-trans-poly-cis-decaprenylcistransferase-like;	GO:0016023//cytoplasmic membrane-bounded vesicle;GO:0016023//cytoplasmic membrane-bounded vesicle;GO:0016023//cytoplasmic membrane-bounded vesicle;GO:0016023//cytoplasmic membrane-bounded vesicle	-	-	gi|195628094|gb|ACG35877.1|/5.83512e-146/hypothetical protein [Zea mays]	GRMZM2G002492
GRMZM2G015925	16	3.83	84	20.11	134	32.08	seq=gene; coord=1:219286751..219295601:1;IPR012337:Polynucleotidyl transferase, Ribonuclease H fold;IPR013520:Exonuclease, RNase T and DNA polymerase III;IPR006055:Exonuclease;IPR006055:Exonuclease;IPR012337:Polynucleotidyl transferase, Ribonuclease H fold;IPR013520:Exonuclease, RNase T and DNA polymerase III;	GO:0009536//plastid;GO:0016020//membrane;GO:0009536//plastid;GO:0016020//membrane	-	-	gi|226492676|ref|NP_001144959.1|/1.54818e-110/hypothetical protein LOC100278096 [Zea mays]	GRMZM2G015925
GRMZM2G017709	2	0.48	1	0.24	0	0	seq=gene; coord=1:270435315..270439745:1	-	-	-	gi|255674860|dbj|BAF13051.2|/2.22611e-15/Os03g0726800 [Oryza sativa Japonica Group]	GRMZM2G017709
GRMZM2G049547	211	50.52	121	28.97	68	16.28	seq=gene; coord=1:285621509..285627980:-1;IPR008915:Peptidase M50;IPR008915:Peptidase M50;	-	-	-	gi|212723720|ref|NP_001131230.1|/0/hypothetical protein LOC100192539 [Zea mays]	GRMZM2G049547
GRMZM2G431509	0	0	0	0	1	0.24	seq=gene; coord=3:198489056..198491130:-1;IPR002048:Calcium-binding EF-hand;IPR018247:EF-HAND 1;IPR013623:NADPH oxidase Respiratory burst;IPR018248:EF hand;	GO:0016020//membrane	GO:0046872//metal ion binding;GO:0016491//oxidoreductase activity;GO:0043169//cation binding	-	gi|209962259|gb|ACJ02085.1|/1.25409e-140/respiratory burst oxidase protein B variant beta [Zea mays]	GRMZM2G431509
GRMZM2G142740	34	8.14	56	13.41	50	11.97	seq=gene; coord=7:87301993..87307586:1;IPR001890:RNA-binding, CRM domain;	GO:0009536//plastid	-	-	gi|242044486|ref|XP_002460114.1|/0/hypothetical protein SORBIDRAFT_02g022940 [Sorghum bicolor]	GRMZM2G142740
GRMZM2G493155	181	43.34	2	0.48	5	1.2	seq=gene; coord=4:166371632..166382202:1;IPR002110:Ankyrin;IPR002885:Pentatricopeptide repeat;IPR004167:E3 binding;	GO:0005739//mitochondrion	-	-	gi|242043130|ref|XP_002459436.1|/3.0345e-72/hypothetical protein SORBIDRAFT_02g004626 [Sorghum bicolor]	GRMZM2G493155
GRMZM2G066222	171	40.94	2411	577.23	2603	623.21	seq=gene; coord=4:223146246..223148783:1;IPR000592:Ribosomal protein S27e;IPR011332:Ribosomal protein, zinc-binding;IPR011332:Ribosomal protein, zinc-binding;	GO:0005840//ribosome;GO:0005840//ribosome;GO:0030529//ribonucleoprotein complex	GO:0003735//structural constituent of ribosome;GO:0008270//zinc ion binding;GO:0003735//structural constituent of ribosome;GO:0008270//zinc ion binding;GO:0046872//metal ion binding	GO:0006412//translation;GO:0006412//translation	gi|223945035|gb|ACN26601.1|/5.64202e-22/unknown [Zea mays]	GRMZM2G066222
GRMZM2G361049	23	5.51	4	0.96	36	8.62	seq=gene; coord=2:12910935..12916297:1;IPR000597:Ribosomal protein L3;IPR003960:ATPase, AAA-type, conserved site;IPR009000:Translation elongation and initiation factors/Ribosomal, beta-barrel;	GO:0005840//ribosome	GO:0003735//structural constituent of ribosome	GO:0006412//translation	gi|194693910|gb|ACF81039.1|/2.31913e-169/unknown [Zea mays]	GRMZM2G361049
GRMZM2G477139	32	7.66	52	12.45	50	11.97	seq=gene; coord=1:118231071..118233387:1;IPR001938:Thaumatin, pathogenesis-related;IPR017949:Thaumatin, conserved site;	GO:0031225//anchored to membrane	-	GO:0051707//response to other organism	gi|242039915|ref|XP_002467352.1|/1.78675e-147/hypothetical protein SORBIDRAFT_01g026270 [Sorghum bicolor]	GRMZM2G477139
GRMZM2G032295	1	0.24	0	0	2	0.48	seq=gene; coord=1:216886922..216888487:1;IPR007650:Protein of unknown function DUF581;	-	-	-	gi|226499570|ref|NP_001140351.1|/6.23664e-71/hypothetical protein LOC100272399 [Zea mays]	GRMZM2G032295
GRMZM2G079417	113	27.06	0	0	122	29.21	seq=gene; coord=5:31665872..31667938:-1	-	-	-	gi|224030051|gb|ACN34101.1|/7.37128e-36/unknown [Zea mays]	GRMZM2G079417
GRMZM2G054120	20	4.79	14	3.35	23	5.51	seq=gene; coord=6:102444830..102447483:-1	-	-	-	gi|226506156|ref|NP_001145061.1|/9.07236e-40/hypothetical protein LOC100278255 [Zea mays]	GRMZM2G054120
GRMZM2G081949	102	24.42	151	36.15	40	9.58	seq=gene; coord=7:153250408..153252067:-1;IPR005516:Remorin, C-terminal region;IPR005516:Remorin, C-terminal region;	-	-	-	gi|194698756|gb|ACF83462.1|/5.65664e-87/unknown [Zea mays]	GRMZM2G081949
GRMZM2G000129	1	0.24	0	0	2	0.48	seq=gene; coord=1:103845261..103846036:1	-	-	-	gi|226499356|ref|NP_001149581.1|/5.30633e-12/guanylate kinase [Zea mays]	GRMZM2G000129
GRMZM2G165631	4	0.96	0	0	2	0.48	seq=gene; coord=5:171383864..171388940:1;IPR013526:ABC-2 transporter;IPR004240:Nonaspanin (TM9SF);	GO:0016023//cytoplasmic membrane-bounded vesicle	-	-	gi|242061932|ref|XP_002452255.1|/0/hypothetical protein SORBIDRAFT_04g022500 [Sorghum bicolor]	GRMZM2G165631
AC165171.2_FG003	2	0.48	9	2.15	9	2.15	seq=gene; coord=3:140867252..140869985:-1;IPR001680:WD40 repeat	-	-	-	gi|212723422|ref|NP_001132308.1|/2.67315e-150/hypothetical protein LOC100193750 [Zea mays]	AC165171.2_FG003
GRMZM2G153666	0	0	0	0	1	0.24	seq=gene; coord=6:99320319..99322185:-1;IPR011050:Pectin lyase fold/virulence factor;IPR000743:Glycoside hydrolase, family 28;IPR000408:Regulator of chromosome condensation, RCC1;IPR006626:Parallel beta-helix repeat;IPR000743:Glycoside hydrolase, family 28;IPR000408:Regulator of chromosome condensation, RCC1;IPR006626:Parallel beta-helix repeat;IPR011050:Pectin lyase fold/virulence factor;	GO:0016023//cytoplasmic membrane-bounded vesicle;GO:0016023//cytoplasmic membrane-bounded vesicle	-	-	gi|226502008|ref|NP_001152243.1|/0/polygalacturonase [Zea mays]	GRMZM2G153666
GRMZM2G002100	65	15.56	43	10.29	22	5.27	seq=gene; coord=6:73555832..73561172:-1;IPR008351:JNK MAP kinase;IPR008350:ERK3/4 MAP kinase;IPR008352:MAP kinase, p38;IPR001245:Tyrosine protein kinase;IPR002290:Serine/threonine protein kinase;IPR017441:Protein kinase, ATP binding site;IPR008271:Serine/threonine protein kinase, active site;IPR003527:MAP kinase, conserved site;IPR011009:Protein kinase-like;IPR017442:Serine/threonine protein kina…	-	GO:0004707//MAP kinase activity;GO:0005524//ATP binding;GO:0004707//MAP kinase activity;GO:0005524//ATP binding	GO:0006468//protein amino acid phosphorylation;GO:0006468//protein amino acid phosphorylation	gi|194702650|gb|ACF85409.1|/0/unknown [Zea mays]	GRMZM2G002100
GRMZM2G064608	67	16.04	80	19.15	104	24.9	seq=gene; coord=5:215064443..215066496:-1;IPR007853:Zinc finger, Zim17-type;	GO:0005739//mitochondrion	-	-	gi|224035959|gb|ACN37055.1|/1.31764e-82/unknown [Zea mays]	GRMZM2G064608
GRMZM2G063806	6	1.44	61	14.6	79	18.91	seq=gene; coord=7:42311250..42318034:-1;IPR000223:Peptidase S26A, signal peptidase I;	-	-	-	gi|218199527|gb|EEC81954.1|/0/hypothetical protein OsI_25833 [Oryza sativa Indica Group]	GRMZM2G063806
GRMZM2G093006	0	0	0	0	1	0.24	seq=gene; coord=3:183965686..183971262:-1;IPR004087:K Homology;	-	-	-	gi|212721042|ref|NP_001132285.1|/3.65461e-139/hypothetical protein LOC100193725 [Zea mays]	GRMZM2G093006
GRMZM2G115939	276	66.08	228	54.59	35	8.38	seq=gene; coord=5:56045112..56056738:1;IPR016135:Ubiquitin-conjugating enzyme/RWD-like;IPR000608:Ubiquitin-conjugating enzyme, E2;IPR010916:TonB box, conserved site;IPR016135:Ubiquitin-conjugating enzyme/RWD-like;IPR000608:Ubiquitin-conjugating enzyme, E2;IPR010916:TonB box, conserved site;IPR000608:Ubiquitin-conjugating enzyme, E2;IPR010916:TonB box, conserved site;IPR016135:Ubiquitin-conjugatin…	-	GO:0005524//ATP binding;GO:0004842//ubiquitin-protein ligase activity;GO:0005524//ATP binding;GO:0004842//ubiquitin-protein ligase activity;GO:0005524//ATP binding;GO:0004842//ubiquitin-protein ligase activity;GO:0005524//ATP binding;GO:0004842//ubiquitin-protein ligase activity	GO:0016579//protein deubiquitination;GO:0019941//modification-dependent protein catabolic process;GO:0051246//regulation of protein metabolic process;GO:0016579//protein deubiquitination;GO:0019941//modification-dependent protein catabolic process;GO:0051246//regulation of protein metabolic process;GO:0016579//protein deubiquitination;GO:0019941//modification-dependent protein catabolic process;G…	gi|162463955|ref|NP_001105261.1|/4.57214e-12/hypothetical protein LOC542170 [Zea mays]	GRMZM2G115939
GRMZM2G335407	16	3.83	16	3.83	0	0	seq=gene; coord=7:35211700..35212173:-1	GO:0016023//cytoplasmic membrane-bounded vesicle	-	-	gi|195629382|gb|ACG36332.1|/6.25615e-37/hypothetical protein [Zea mays]	GRMZM2G335407
GRMZM2G164400	3	0.72	1	0.24	5	1.2	seq=gene; coord=2:7472751..7481296:1	-	-	-	gi|226500778|ref|NP_001143704.1|/6.74931e-120/hypothetical protein LOC100276441 [Zea mays]	GRMZM2G164400
AC184169.3_FG001	3	0.72	2	0.48	1	0.24	seq=gene; coord=4:26646630..26647773:1;IPR000104:Antifreeze protein, type I	-	-	-	gi|242080881|ref|XP_002445209.1|/5.40896e-32/hypothetical protein SORBIDRAFT_07g005960 [Sorghum bicolor]	AC184169.3_FG001
GRMZM2G015881	182	43.58	132	31.6	274	65.6	seq=gene; coord=3:193637910..193644675:-1;IPR012479:HCNGP-like;IPR012479:HCNGP-like;IPR012479:HCNGP-like;	GO:0005739//mitochondrion;GO:0005739//mitochondrion;GO:0005739//mitochondrion	-	-	gi|226497554|ref|NP_001150202.1|/2.69165e-178/transcription regulator [Zea mays]	GRMZM2G015881
GRMZM2G123387	20	4.79	100	23.94	326	78.05	seq=gene; coord=2:21418113..21423040:-1;IPR003657:DNA-binding WRKY;IPR003657:DNA-binding WRKY;	-	-	-	gi|224031607|gb|ACN34879.1|/5.71069e-58/unknown [Zea mays]	GRMZM2G123387
GRMZM2G306079	110	26.34	130	31.12	28	6.7	seq=gene; coord=1:105334881..105338129:1;IPR017907:Zinc finger, RING-type, conserved site;IPR001841:Zinc finger, RING-type;IPR017907:Zinc finger, RING-type, conserved site;IPR001841:Zinc finger, RING-type;	GO:0009536//plastid;GO:0009536//plastid	-	-	gi|212275015|ref|NP_001130302.1|/0/hypothetical protein LOC100191396 [Zea mays]	GRMZM2G306079
GRMZM2G156174	29	6.94	298	71.35	135	32.32	seq=gene; coord=10:141289398..141297567:-1	-	-	-	gi|242074254|ref|XP_002447063.1|/0/hypothetical protein SORBIDRAFT_06g027930 [Sorghum bicolor]	GRMZM2G156174
GRMZM2G177575	31	7.42	103	24.66	89	21.31	seq=gene; coord=2:112836008..112841146:1;IPR001461:Peptidase A1;IPR001969:Peptidase aspartic, active site;IPR009007:Peptidase aspartic, catalytic;IPR001461:Peptidase A1;IPR009007:Peptidase aspartic, catalytic;IPR001969:Peptidase aspartic, active site;IPR001461:Peptidase A1;IPR001969:Peptidase aspartic, active site;IPR009007:Peptidase aspartic, catalytic;IPR001461:Peptidase A1;IPR001969:Peptidase …	-	-	-	gi|195647908|gb|ACG43422.1|/0/aspartic-type endopeptidase/ pepsin A [Zea mays]	GRMZM2G177575
AC233979.1_FG010	4	0.96	1	0.24	0	0	seq=gene; coord=10:134807799..134809396:1	-	-	-	gi|195621490|gb|ACG32575.1|/2.99692e-32/hypothetical protein [Zea mays]	AC233979.1_FG010
GRMZM2G125656	9	2.15	8	1.92	9	2.15	seq=gene; coord=10:138953687..138957146:1;IPR000009:Protein phosphatase 2A, regulatory subunit PR55;IPR011046:WD40 repeat-like;IPR001680:WD40 repeat;IPR001680:WD40 repeat;IPR011046:WD40 repeat-like;	-	-	-	gi|242074026|ref|XP_002446949.1|/2.6276e-153/hypothetical protein SORBIDRAFT_06g025690 [Sorghum bicolor]	GRMZM2G125656
GRMZM2G454018	0	0	1	0.24	0	0	seq=gene; coord=1:119755809..119756663:1;IPR001232:SKP1 component;IPR016072:SKP1 component, dimerisation;	-	-	-	gi|226498146|ref|NP_001143432.1|/2.23089e-39/hypothetical protein LOC100276081 [Zea mays]	GRMZM2G454018
GRMZM2G321053	3	0.72	5	1.2	0	0	seq=gene; coord=1:6184429..6187368:-1	-	-	-	gi|108705988|gb|ABF93783.1|/2.14803e-119/expressed protein [Oryza sativa (japonica cultivar-group)]	GRMZM2G321053
GRMZM2G121621	12	2.87	26	6.22	19	4.55	seq=gene; coord=9:96074000..96076283:-1;IPR008166:Protein of unknown function DUF23;	-	-	-	gi|212274613|ref|NP_001130404.1|/0/hypothetical protein LOC100191500 [Zea mays]	GRMZM2G121621
GRMZM2G132971	146	34.96	274	65.6	263	62.97	seq=gene; coord=1:286629025..286633231:1;IPR000232:Heat shock factor (HSF)-type, DNA-binding;IPR000232:Heat shock factor (HSF)-type, DNA-binding;	-	-	-	gi|226510570|ref|NP_001147891.1|/1.11525e-148/heat shock factor protein HSF30 [Zea mays]	GRMZM2G132971
GRMZM2G312154	99	23.7	34	8.14	75	17.96	seq=gene; coord=2:231076976..231087628:1	-	-	-	gi|226533560|ref|NP_001142976.1|/0/hypothetical protein LOC100275430 [Zea mays]	GRMZM2G312154
GRMZM2G080930	59	14.13	143	34.24	111	26.58	seq=gene; coord=5:212237625..212241262:-1;IPR001878:Zinc finger, CCHC-type;IPR000504:RNA recognition motif, RNP-1;IPR001878:Zinc finger, CCHC-type;IPR000504:RNA recognition motif, RNP-1;IPR001878:Zinc finger, CCHC-type;IPR000504:RNA recognition motif, RNP-1;	-	-	-	gi|212722094|ref|NP_001132794.1|/1.12203e-26/hypothetical protein LOC100194283 [Zea mays]	GRMZM2G080930
GRMZM2G011507	2	0.48	84	20.11	26	6.22	seq=gene; coord=6:146162295..146167650:1;IPR010121:Pyruvate, phosphate dikinase;IPR018274:PEP-utilising enzyme, mobile region, conserved site;IPR000121:PEP-utilizing enzyme;IPR015813:Pyruvate/Phosphoenolpyruvate kinase, catalytic core;IPR002192:Pyruvate phosphate dikinase, PEP/pyruvate-binding;IPR008279:PEP-utilising enzyme, mobile region;IPR018274:PEP-utilising enzyme, mobile region, conserved s…	-	GO:0005524//ATP binding;GO:0004674//protein serine/threonine kinase activity;GO:0005524//ATP binding;GO:0004674//protein serine/threonine kinase activity;GO:0005524//ATP binding;GO:0004674//protein serine/threonine kinase activity;GO:0005524//ATP binding;GO:0004674//protein serine/threonine kinase activity	GO:0006468//protein amino acid phosphorylation;GO:0006468//protein amino acid phosphorylation;GO:0006468//protein amino acid phosphorylation;GO:0006468//protein amino acid phosphorylation	gi|219885341|gb|ACL53045.1|/0/unknown [Zea mays]	GRMZM2G011507
GRMZM2G055826	2	0.48	0	0	1	0.24	seq=gene; coord=5:116869180..116870816:1;IPR001810:Cyclin-like F-box;	-	-	-	gi|226503537|ref|NP_001150620.1|/0/F-box domain containing protein [Zea mays]	GRMZM2G055826
GRMZM2G362926	2	0.48	0	0	2	0.48	seq=gene; coord=6:143266343..143267724:-1	-	-	-	gi|226501728|ref|NP_001141812.1|/1.17348e-95/hypothetical protein LOC100273951 [Zea mays]	GRMZM2G362926
GRMZM2G472096	7	1.68	2	0.48	37	8.86	seq=gene; coord=7:21095072..21095959:-1;IPR002100:Transcription factor, MADS-box;	-	-	-	gi|242043398|ref|XP_002459570.1|/3.22627e-52/hypothetical protein SORBIDRAFT_02g006730 [Sorghum bicolor]	GRMZM2G472096
GRMZM2G358467	15	3.59	13	3.11	17	4.07	seq=gene; coord=7:149713478..149719036:1	-	GO:0016798//hydrolase activity, acting on glycosyl bonds;GO:0016161//beta-amylase activity	GO:0005975//carbohydrate metabolic process;GO:0000272//polysaccharide catabolic process	gi|4321978|gb|AAD15902.1|/3.38073e-114/beta-amylase [Zea mays]	GRMZM2G358467
GRMZM2G136113	7	1.68	0	0	0	0	seq=gene; coord=1:14614379..14623214:-1;IPR004348:Protein of unknown function DUF246, plant;IPR004348:Protein of unknown function DUF246, plant;	-	-	-	gi|242036799|ref|XP_002465794.1|/0/hypothetical protein SORBIDRAFT_01g045900 [Sorghum bicolor]	GRMZM2G136113
AC205008.4_FG002	38	9.1	116	27.77	7	1.68	seq=gene; coord=7:21621029..21624167:1;IPR018303:ATPase, P-type phosphorylation site	-	-	-	gi|242043416|ref|XP_002459579.1|/0/hypothetical protein SORBIDRAFT_02g006950 [Sorghum bicolor]	AC205008.4_FG002
GRMZM2G457424	61	14.61	27	6.46	19	4.55	seq=gene; coord=3:184354676..184356180:1	-	-	-	gi|194694178|gb|ACF81173.1|/1.52038e-43/unknown [Zea mays]	GRMZM2G457424
GRMZM2G354093	2	0.48	1	0.24	0	0	seq=gene; coord=5:75947241..75948188:1	-	-	-	gi|226508530|ref|NP_001143257.1|/7.49133e-143/hypothetical protein LOC100275786 [Zea mays]	GRMZM2G354093
GRMZM2G092672	5	1.2	1	0.24	0	0	seq=gene; coord=5:179147552..179149746:1;IPR003591:Leucine-rich repeat, typical subtype;IPR001611:Leucine-rich repeat;IPR003591:Leucine-rich repeat, typical subtype;IPR001611:Leucine-rich repeat;	-	-	-	gi|242062170|ref|XP_002452374.1|/0/hypothetical protein SORBIDRAFT_04g024650 [Sorghum bicolor]	GRMZM2G092672
GRMZM2G312244	18	4.31	10	2.39	15	3.59	seq=gene; coord=3:184495193..184499034:-1;IPR001876:Zinc finger, RanBP2-type;	-	-	-	gi|242054765|ref|XP_002456528.1|/0/hypothetical protein SORBIDRAFT_03g037900 [Sorghum bicolor]	GRMZM2G312244
GRMZM2G451147	1	0.24	0	0	0	0	seq=gene; coord=8:150733689..150737403:1;IPR001245:Tyrosine protein kinase;IPR017441:Protein kinase, ATP binding site;IPR008271:Serine/threonine protein kinase, active site;IPR002290:Serine/threonine protein kinase;IPR011009:Protein kinase-like;IPR017442:Serine/threonine protein kinase-related;	-	-	-	gi|242054059|ref|XP_002456175.1|/7.43413e-179/hypothetical protein SORBIDRAFT_03g031680 [Sorghum bicolor]	GRMZM2G451147
GRMZM2G117335	0	0	1	0.24	0	0	seq=gene; coord=6:138676794..138679563:-1;IPR000104:Antifreeze protein, type I;	-	-	-	gi|242036349|ref|XP_002465569.1|/7.11516e-28/hypothetical protein SORBIDRAFT_01g041260 [Sorghum bicolor]	GRMZM2G117335
GRMZM2G424582	97	23.22	114	27.29	109	26.1	seq=gene; coord=6:144203015..144221552:-1;IPR002110:Ankyrin;IPR011009:Protein kinase-like;IPR017442:Serine/threonine protein kinase-related;IPR001245:Tyrosine protein kinase;IPR017907:Zinc finger, RING-type, conserved site;IPR001841:Zinc finger, RING-type;IPR002290:Serine/threonine protein kinase;	-	GO:0005515//protein binding	-	gi|242090433|ref|XP_002441049.1|/0/hypothetical protein SORBIDRAFT_09g019370 [Sorghum bicolor]	GRMZM2G424582
GRMZM2G061018	100	23.94	56	13.41	103	24.66	seq=gene; coord=3:2902798..2908240:1	-	-	-	gi|293335293|ref|NP_001168194.1|/0/hypothetical protein LOC100381950 [Zea mays]	GRMZM2G061018
GRMZM2G078379	121	28.97	234	56.02	258	61.77	seq=gene; coord=5:22608087..22621113:-1;IPR005427:Salmonella/Shigella invasin protein C;IPR003121:SWIB/MDM2;IPR018144:Plus-3 domain, subgroup;IPR003169:GYF;IPR000571:Zinc finger, CCCH-type;IPR004343:Plus-3;	-	-	-	gi|242039111|ref|XP_002466950.1|/0/hypothetical protein SORBIDRAFT_01g017290 [Sorghum bicolor]	GRMZM2G078379
GRMZM2G180922	30	7.18	145	34.72	32	7.66	seq=gene; coord=5:201956451..201961027:1;IPR016040:NAD(P)-binding;IPR002198:Short-chain dehydrogenase/reductase SDR;IPR005913:dTDP-4-dehydrorhamnose reductase;IPR001509:NAD-dependent epimerase/dehydratase;IPR002225:3-beta hydroxysteroid dehydrogenase/isomerase;IPR013120:Male sterility, NAD-binding;IPR003869:Polysaccharide biosynthesis protein CapD;	-	-	-	gi|212723954|ref|NP_001132313.1|/0/hypothetical protein LOC100193755 [Zea mays]	GRMZM2G180922
GRMZM2G092051	996	238.47	14	3.35	315	75.42	seq=gene; coord=4:185576974..185578613:-1	-	-	-	gi|226507318|ref|NP_001145204.1|/2.36447e-20/hypothetical protein LOC100278459 [Zea mays]	GRMZM2G092051
GRMZM2G070693	580	138.87	187	44.77	242	57.94	seq=gene; coord=4:45077312..45080997:-1;IPR000348:emp24/gp25L/p24;IPR000348:emp24/gp25L/p24;IPR000348:emp24/gp25L/p24;IPR000348:emp24/gp25L/p24;IPR000348:emp24/gp25L/p24;	GO:0016023//cytoplasmic membrane-bounded vesicle;GO:0016023//cytoplasmic membrane-bounded vesicle;GO:0016023//cytoplasmic membrane-bounded vesicle;GO:0016023//cytoplasmic membrane-bounded vesicle;GO:0016023//cytoplasmic membrane-bounded vesicle;GO:0016023//cytoplasmic membrane-bounded vesicle	-	-	gi|212721526|ref|NP_001132648.1|/6.19081e-122/hypothetical protein LOC100194123 [Zea mays]	GRMZM2G070693
GRMZM2G000071	1	0.24	0	0	2	0.48	seq=gene; coord=5:140167310..140168829:1;IPR006058:2Fe-2S ferredoxin, iron-sulphur binding site;IPR001041:Ferredoxin;	-	-	-	gi|226531914|ref|NP_001150615.1|/2.09577e-132/photoperiod responsive protein [Zea mays]	GRMZM2G000071
GRMZM2G009353	67	16.04	79	18.91	97	23.22	seq=gene; coord=10:63360358..63365350:1;IPR003855:K+ potassium transporter;IPR018519:Potassium uptake protein, kup;IPR003855:K+ potassium transporter;	GO:0016020//membrane;GO:0016020//membrane	-	-	gi|125560531|gb|EAZ05979.1|/0/hypothetical protein OsI_28221 [Oryza sativa Indica Group]	GRMZM2G009353
GRMZM2G013957	611	146.29	14	3.35	74	17.72	seq=gene; coord=1:48781231..48784536:-1;IPR012482:Lg106-like;IPR012482:Lg106-like;IPR012482:Lg106-like;	-	-	-	gi|212723106|ref|NP_001131487.1|/1.02822e-23/hypothetical protein LOC100192824 [Zea mays]	GRMZM2G013957
GRMZM2G005996	3	0.72	153	36.63	5	1.2	seq=gene; coord=5:193129129..193133348:1;IPR016688:Membrane protein, At2g17000, predicted;IPR010920:Like-Sm ribonucleoprotein-related, core;IPR006685:Mechanosensitive ion channel MscS;	-	-	-	gi|259490196|ref|NP_001159287.1|/0/hypothetical protein LOC100304377 [Zea mays]	GRMZM2G005996
GRMZM2G168506	213	51	123	29.45	199	47.64	seq=gene; coord=5:33406826..33412967:-1;IPR005123:2OG-Fe(II) oxygenase;IPR003582:Metridin-like ShK toxin;IPR006620:Prolyl 4-hydroxylase, alpha subunit;IPR006620:Prolyl 4-hydroxylase, alpha subunit;IPR003582:Metridin-like ShK toxin;IPR005123:2OG-Fe(II) oxygenase;IPR005123:2OG-Fe(II) oxygenase;IPR003582:Metridin-like ShK toxin;IPR006620:Prolyl 4-hydroxylase, alpha subunit;	-	-	-	gi|212720650|ref|NP_001132477.1|/8.72088e-121/hypothetical protein LOC100193935 [Zea mays]	GRMZM2G168506
GRMZM2G377168	57	13.65	234	56.02	139	33.28	seq=gene; coord=5:177312298..177313349:1;IPR000104:Antifreeze protein, type I;	-	-	-	gi|226508866|ref|NP_001143858.1|/1.59992e-19/hypothetical protein LOC100276652 [Zea mays]	GRMZM2G377168
GRMZM2G465208	0	0	0	0	1	0.24	seq=gene; coord=10:131875614..131877956:-1;IPR017859:Treacher Collins Syndrome, treacle-like;IPR003072:Orphan nuclear receptor, NOR1 type;	-	-	-	gi|242076560|ref|XP_002448216.1|/0/hypothetical protein SORBIDRAFT_06g023300 [Sorghum bicolor]	GRMZM2G465208
GRMZM2G143723	7	1.68	14	3.35	29	6.94	seq=gene; coord=3:5690636..5693535:-1;IPR007087:Zinc finger, C2H2-type;IPR015880:Zinc finger, C2H2-like;	-	GO:0008270//zinc ion binding	-	gi|242056083|ref|XP_002457187.1|/7.76968e-177/hypothetical protein SORBIDRAFT_03g002960 [Sorghum bicolor]	GRMZM2G143723
GRMZM2G480171	362	86.67	389	93.13	648	155.14	seq=gene; coord=10:144158906..144167577:1;IPR002298:DNA polymerase A;IPR002562:3'-5' exonuclease;IPR001098:DNA-directed DNA polymerase, family A;IPR012337:Polynucleotidyl transferase, Ribonuclease H fold;IPR002562:3'-5' exonuclease;IPR001098:DNA-directed DNA polymerase, family A;IPR012337:Polynucleotidyl transferase, Ribonuclease H fold;	GO:0009536//plastid;GO:0009536//plastid	-	-	gi|242074498|ref|XP_002447185.1|/0/hypothetical protein SORBIDRAFT_06g030120 [Sorghum bicolor]	GRMZM2G480171
GRMZM2G110858	11	2.63	8	1.92	18	4.31	seq=gene; coord=3:227367970..227370451:1	-	-	-	gi|219363263|ref|NP_001136574.1|/1.01195e-114/hypothetical protein LOC100216696 [Zea mays]	GRMZM2G110858
GRMZM2G075124	118	28.25	135	32.32	160	38.31	seq=gene; coord=4:171176241..171180486:1;IPR017441:Protein kinase, ATP binding site;IPR008271:Serine/threonine protein kinase, active site;IPR001245:Tyrosine protein kinase;IPR002290:Serine/threonine protein kinase;IPR011009:Protein kinase-like;IPR017442:Serine/threonine protein kinase-related;IPR011009:Protein kinase-like;IPR017441:Protein kinase, ATP binding site;	-	GO:0005515//protein binding	-	gi|219886749|gb|ACL53749.1|/6.57266e-14/unknown [Zea mays]	GRMZM2G075124
GRMZM2G177901	5	1.2	10	2.39	16	3.83	seq=gene; coord=5:67494804..67495529:1	-	-	-	gi|226504144|ref|NP_001145453.1|/5.39599e-54/hypothetical protein LOC100278836 [Zea mays]	GRMZM2G177901
GRMZM2G478238	1	0.24	14	3.35	19	4.55	seq=gene; coord=4:1703235..1712053:-1;IPR017997:Vinculin;IPR003594:ATP-binding region, ATPase-like;	-	-	-	gi|224028307|gb|ACN33229.1|/3.54291e-39/unknown [Zea mays]	GRMZM2G478238
GRMZM2G038922	43	10.3	34	8.14	24	5.75	seq=gene; coord=1:166665762..166667968:-1;IPR000544:Lipoate-protein ligase B;IPR004143:Biotin/lipoate A/B protein ligase;	-	-	-	gi|224032725|gb|ACN35438.1|/4.06323e-77/unknown [Zea mays]	GRMZM2G038922
GRMZM2G022706	3	0.72	10	2.39	5	1.2	seq=gene; coord=6:90196071..90197494:-1	-	-	-	gi|226505840|ref|NP_001145391.1|/7.04879e-126/hypothetical protein LOC100278741 [Zea mays]	GRMZM2G022706
GRMZM2G173777	20	4.79	50	11.97	294	70.39	seq=gene; coord=7:43273716..43281341:-1;IPR003954:RNA recognition, region 1;IPR000504:RNA recognition motif, RNP-1;IPR001876:Zinc finger, RanBP2-type;IPR000467:D111/G-patch;IPR001876:Zinc finger, RanBP2-type;IPR003954:RNA recognition, region 1;IPR000504:RNA recognition motif, RNP-1;IPR001876:Zinc finger, RanBP2-type;IPR003954:RNA recognition, region 1;IPR000504:RNA recognition motif, RNP-1;	-	-	-	gi|242058555|ref|XP_002458423.1|/0/hypothetical protein SORBIDRAFT_03g033240 [Sorghum bicolor]	GRMZM2G173777
GRMZM2G125495	6	1.44	26	6.22	2	0.48	seq=gene; coord=2:200700786..200705284:1;IPR002455:GPCR, family 3, gamma-aminobutyric acid receptor, type B;IPR001638:Extracellular solute-binding protein, family 3;IPR001320:Ionotropic glutamate receptor;IPR017103:Ionotropic glutamate-like receptor, plant;IPR001828:Extracellular ligand-binding receptor;	GO:0016023//cytoplasmic membrane-bounded vesicle	-	-	gi|242045842|ref|XP_002460792.1|/0/hypothetical protein SORBIDRAFT_02g034960 [Sorghum bicolor]	GRMZM2G125495
GRMZM2G473586	3	0.72	1	0.24	5	1.2	seq=gene; coord=5:7245250..7245940:1	-	-	-	gi|226500364|ref|NP_001146818.1|/2.32375e-32/hypothetical protein LOC100280423 [Zea mays]	GRMZM2G473586
GRMZM2G330719	11	2.63	40	9.58	19	4.55	seq=gene; coord=8:159647688..159649166:1;IPR004064:EDG-6 sphingosine 1-phosphate receptor;	-	-	-	gi|226494403|ref|NP_001142396.1|/5.93576e-92/hypothetical protein LOC100274570 [Zea mays]	GRMZM2G330719
GRMZM2G450825	1	0.24	1	0.24	6	1.44	seq=gene; coord=1:233988859..233992067:-1;IPR000883:Cytochrome c oxidase, subunit I;IPR014241:Cytochrome c oxidase, subunit I bacterial type;IPR000883:Cytochrome c oxidase, subunit I;	GO:0005751//mitochondrial respiratory chain complex IV;GO:0016021//integral to membrane;GO:0005886//plasma membrane;GO:0005751//mitochondrial respiratory chain complex IV;GO:0016021//integral to membrane;GO:0005886//plasma membrane	GO:0005507//copper ion binding;GO:0004129//cytochrome-c oxidase activity;GO:0009055//electron carrier activity;GO:0020037//heme binding;GO:0005507//copper ion binding;GO:0004129//cytochrome-c oxidase activity;GO:0009055//electron carrier activity;GO:0020037//heme binding	GO:0006810//transport;GO:0009060//aerobic respiration;GO:0006123//mitochondrial electron transport, cytochrome c to oxygen;GO:0006810//transport;GO:0009060//aerobic respiration;GO:0006123//mitochondrial electron transport, cytochrome c to oxygen	gi|289065057|ref|YP_003433868.1|/0/cytochrome c oxidase subunit 1 [Oryza rufipogon]	GRMZM2G450825
GRMZM2G068471	414	99.12	1021	244.44	656	157.06	seq=gene; coord=1:263196960..263204034:1;IPR001357:BRCT;IPR010613:Pescadillo, N-terminal;IPR010613:Pescadillo, N-terminal;	GO:0005634//nucleus;GO:0005730//nucleolus	-	GO:0009987//cellular process	gi|223945377|gb|ACN26772.1|/0/unknown [Zea mays]	GRMZM2G068471
GRMZM2G312419	2	0.48	9	2.15	3	0.72	seq=gene; coord=8:2740206..2741997:-1;IPR001005:SANT, DNA-binding;IPR009057:Homeodomain-like;IPR014778:Myb, DNA-binding;	-	-	-	gi|242056985|ref|XP_002457638.1|/2.15224e-69/hypothetical protein SORBIDRAFT_03g010960 [Sorghum bicolor]	GRMZM2G312419
GRMZM2G054267	0	0	0	0	2	0.48	seq=gene; coord=7:13836497..13837791:1	GO:0016023//cytoplasmic membrane-bounded vesicle	-	-	gi|226493404|ref|NP_001143659.1|/1.83197e-94/hypothetical protein LOC100276382 [Zea mays]	GRMZM2G054267
GRMZM2G153536	4	0.96	0	0	1	0.24	seq=gene; coord=1:29612426..29615642:-1;IPR005786:Branched-chain amino acid aminotransferase II;IPR001544:Aminotransferase, class IV;IPR018300:Aminotransferase, class IV, conserved site;IPR018300:Aminotransferase, class IV, conserved site;IPR005786:Branched-chain amino acid aminotransferase II;IPR001544:Aminotransferase, class IV;IPR018300:Aminotransferase, class IV, conserved site;IPR005786:Bran…	-	-	-	gi|223949187|gb|ACN28677.1|/0/unknown [Zea mays]	GRMZM2G153536
GRMZM2G323818	13	3.11	0	0	4	0.96	seq=gene; coord=4:146942675..146945485:-1;IPR001005:SANT, DNA-binding;IPR009057:Homeodomain-like;IPR014778:Myb, DNA-binding;	-	-	-	gi|226528523|ref|NP_001141302.1|/7.06365e-137/hypothetical protein LOC100273393 [Zea mays]	GRMZM2G323818
GRMZM2G378665	20	4.79	63	15.08	65	15.56	seq=gene; coord=5:204705564..204710046:-1;IPR003316:Transcription factor E2F/dimerisation partner (TDP);	-	-	-	gi|242062578|ref|XP_002452578.1|/1.54406e-160/hypothetical protein SORBIDRAFT_04g028440 [Sorghum bicolor]	GRMZM2G378665
GRMZM2G040627	29	6.94	44	10.53	73	17.48	seq=gene; coord=2:2057038..2066999:1;IPR018085:Uracil-DNA glycosylase, active site;IPR002043:Uracil-DNA glycosylase;IPR005122:Uracil-DNA glycosylase-like;	GO:0009536//plastid;GO:0009536//plastid	GO:0016787//hydrolase activity;GO:0016798//hydrolase activity, acting on glycosyl bonds	GO:0006281//DNA repair;GO:0006284//base-excision repair	gi|194704478|gb|ACF86323.1|/9.33755e-136/unknown [Zea mays]	GRMZM2G040627
GRMZM2G127312	316	75.66	442	105.82	242	57.94	seq=gene; coord=8:17994859..17997325:-1;IPR007023:Ribosomal biogenesis regulatory protein;IPR005819:Histone H5;	GO:0005739//mitochondrion;GO:0005739//mitochondrion	-	-	gi|242056177|ref|XP_002457234.1|/5.31648e-140/hypothetical protein SORBIDRAFT_03g003790 [Sorghum bicolor]	GRMZM2G127312
GRMZM2G023239	13	3.11	29	6.94	29	6.94	seq=gene; coord=2:5824592..5828601:1;IPR011011:Zinc finger, FYVE/PHD-type;IPR001394:Peptidase C19, ubiquitin carboxyl-terminal hydrolase 2;IPR001607:Zinc finger, UBP-type;IPR000215:Protease inhibitor I4, serpin;IPR018200:Peptidase C19, ubiquitin carboxyl-terminal hydrolase 2, conserved site;IPR018200:Peptidase C19, ubiquitin carboxyl-terminal hydrolase 2, conserved site;IPR001607:Zinc finger, UBP…	-	-	-	gi|242077396|ref|XP_002448634.1|/0/hypothetical protein SORBIDRAFT_06g030580 [Sorghum bicolor]	GRMZM2G023239
[truncated: 21,634 more rows]

## Sheet: Table S4
Table S4. The same new transcripts in all samples
Tag	F1 Copy Num	F1 TPM	B73 Copy Num	B73 TPM	MO17 Copy Num	Mo17 TPM	hits	+/-	chr	start	type	mismatch
CATGTTTGATGGTTGAGAAGG	2124	508.54	3656	875.31	3022	723.53	1	+	chr1	73063954	0
CATGCTAGAGATTTTTCCTGG	3650	873.91	1850	442.92	2596	621.54	1	+	chr5	79662715	0
CATGCTTCTTAAAAAAAAAAA	7259	1738.01	583	139.58	112	26.82	1	+	chr1	12309527	1	4:T>C
CATGGGGTTGTAAGCTGTCTC	1483	355.07	788	188.66	5178	1239.72	1	-	chr9	119088462	0
CATGAATCTGTTTGGCTGTCG	3258	780.06	1995	477.64	1038	248.52	1	-	chr5	5422534	0
CATGCTCCATTTTGTGTTCAA	3647	873.19	1708	408.92	534	127.85	1	-	chr8	16208404	1	20:G>T
CATGCTCGTGTCTAGATCTGT	740	177.18	2422	579.87	2530	605.73	1	-	chr2	192841068	1	4:A>G
CATGGAGGAGTTCAGGAAGGA	2063	493.94	2256	540.12	1204	288.26	2	-	chr7	141323617	1	2:C>A
CATGGAGGAGTTCAGGAAGGA	2063	493.94	2256	540.12	1204	288.26	2	+	chr2	194725336	1	2:G>T
CATGTTCTGTTTCTCGTTCTG	1063	254.51	872	208.77	3374	807.8	1	-	chr2	192840941	0
[truncated: 9,732 more rows]

## Sheet: Table S5
Table S5. Differentially expressed DGE tags.
[truncated: 32,980 more rows]

[truncated: 12 more sheets: Table S6, Table S7, Table S8, Table S9, Table S10, Table S11, Table S12, Table S13-a, Table S13-b, Table S14, Table S15, Table S16]
